# Supplementary material for: The human cytoplasmic dynein interactome reveals novel activators of motility
Source: eLife journal article supplement (doi:10.7554/elife.28257), 2017-07-18
Supplement: supp [file elife_poa_e28257_Supplementary_File_4.xlsx]

## Sheet: stats and notes
	Number of hits in activator NT and CT datasets after contrasting (specific and shared hits)
			NT & CT contrasted separately				NT & CT contrasted together
	NT input	CT input	NT specific	NT shared	CT specific	CT shared	NT specific	NT shared	CT specific	CT shared	CT shared with other CT
BICD1	24	180	8	16	45	135	7	17	45	135	92
BICD2	52	245	33	19	136	109	13	39	132	113	87
HOOK1	50	86	18	32	21	65	13	37	17	69	39
HOOK3	46	87	17	29	24	63	14	32	23	64	37
NIN	78	166	67	11	49	117	58	20	41	125	74
NINL	44	124	32	12	39	85	4	40	31	93	53
	Unique hits
all NT	225
all CT	547
overall	678
	green tabs = Filtered NT and CT datasets from Supplemental File 1. ≥3-fold enrichment, p<0.05, average spectral counts ≥ 2.
	blue tabs = NT BioID datasets contrasted. Venn analysis and hits.
	orange tabs = CT BioID datasets contrasted. Venn analysis and hits.
	magenta tabs = NT and CT BioID datasets contrasted together. Venn analysis and hits.

## Sheet: NT BICD1
				BioID-BICD1								BioID control
				distributed normalized spectral abundance factor (dNSAF)				distributed Spectral Counts				distributed normalized spectral abundance factor (dNSAF)					distributed Spectral Counts
NCBI_Gene	Description	enrichment ratio	p-value	dNSAF 1	dNSAF 2	dNSAF 3	avg dNSAF	dSC 1	dSC 2	dSC 3	avg dSCs	dNSAF 1	dNSAF 2	dNSAF 3	dNSAF 4	avg dNSAF	dSC 1	dSC 2	dSC 3	dSC 4	avg dSCs
BICD1	protein bicaudal D homolog 1 isoform 1 [Homo sapiens]	∞	0.000959208	0.203218	0.217303	0.341009	0.253843	2377.86	2409.67	1986.02	2257.85	0	0	0	0	0	0	0	0	0	0
DBI	acyl-CoA-binding protein isoform 2 [Homo sapiens]	∞	0.0384764	0.00094689	0.00299745	0.00570724	0.00321719	1	3	3	2.33333	0	0	0	0	0	0	0	0	0	0
DBT	lipoamide acyltransferase component of branched-chain alpha-keto acid dehydrogenase complex, mitochondrial precursor [Homo sapiens]	∞	0.00215569	0.00138301	0.00145934	0.00069466	0.001179	8	8	2	6	0	0	0	0	0	0	0	0	0	0
TMEM57	macoilin isoform a [Homo sapiens]	∞	0.00750657	0.00075295	0.00026483	0.00075638	0.000591387	6	2	3	3.66667	0	0	0	0	0	0	0	0	0	0
TUBA8	tubulin alpha-8 chain isoform 2 [Homo sapiens]	∞	0.000471463	0.00181301	0.00107132	0.00145703	0.00144712	8.33333	4.66667	3.33333	5.44444	0	0	0	0	0	0	0	0	0	0
RAD50	DNA repair protein RAD50 [Homo sapiens]	38.0707	0.00174655	0.00946311	0.00502621	0.00625244	0.00691392	149	75	49	91	7.962e-05	0.00031334	0.00016158	0.00017189	0.000181608	5	12	7	6	7.5
BRWD1	bromodomain and WD repeat-containing protein 1 isoform A [Homo sapiens]	29.5306	0.0094158	0.00068241	0.00026529	0.0003608	0.000436167	19	7	5	10.3333	0	1.477e-05	0	0	1.477e-05	0	1	0	0	0.25
NBN	nibrin [Homo sapiens]	15.8561	0.00124215	0.00751483	0.00536413	0.00421861	0.00569919	68	46	19	44.3333	0.00022166	0.00045435	0.00056232	0.0001994	0.000359433	8	10	14	4	9
KRI1	protein KRI1 homolog [Homo sapiens]	9.51063	0.00125755	0.0049361	0.00359637	0.00283349	0.00378865	42	29	12	27.6667	0.00032412	0.00028991	0.00055529	0.00042412	0.00039836	11	6	13	8	9.5
UBR5	1 genes:UBR5. 4 proteins in this group did not match any genes. gi|15147337|ref|NP_056986.2|:UBR5:E3 ubiquitin-protein ligase UBR5 isoform 1 [Homo sapiens] ;gi|530389102|ref|XP_005251013.1|:PREDICTED: E3 ubiquitin-protein ligase UBR5 isoform X1 [Homo sapiens] ;gi|530389104|ref|XP_005251014.1|:PREDICTED: E3 ubiquitin-protein ligase UBR5 isoform X2 [Homo sapiens] ;gi|530389108|ref|XP_005251016.1|:P…	8.36205	0.0163016	0.00056563	0.00037696	0.00017943	0.000374007	19	12	3	11.3333	0	8.568e-05	2.164e-05	2.686e-05	4.47267e-05	0	7	2	2	2.75
KIAA1671	PREDICTED: uncharacterized protein KIAA1671 isoform X3 [Homo sapiens]	8.34347	3.00702e-06	0.00276831	0.00296979	0.00305903	0.00293238	60	61	33	51.3333	0.00031233	0.00017072	0.00040246	0.00052032	0.000351457	27	9	24	25	21.25
PCCB	propionyl-CoA carboxylase beta chain, mitochondrial isoform 1 precursor [Homo sapiens]	7.39943	0.000273194	0.0463782	0.0324622	0.0441049	0.0409818	300	199	142	213.667	0.0018992	0.00788129	0.00623677	0.00613675	0.0055385	49	124	111	88	93
BICD2	protein bicaudal D homolog 2 isoform 1 [Homo sapiens]	7.14795	0.000171892	0.00897989	0.0122712	0.00939542	0.0102155	92.1416	119.327	47.9839	86.4841	0.00180813	0.00140238	0.00127515	0.00123094	0.00142915	74	35	36	28	43.25
ACACA	acetyl-CoA carboxylase 1 isoform 2 [Homo sapiens]	6.29729	0.000455446	0.00770749	0.0053782	0.00784968	0.00697846	217	143.5	110	156.833	0.00054766	0.00159171	0.00131996	0.00097334	0.00110817	61.5	109	102.25	60.75	83.375
KRT19	keratin, type I cytoskeletal 19 [Homo sapiens]	5.98941	0.0123958	0.00114077	0.00249121	0.00251118	0.00204772	5.47619	11.3333	6	7.60317	0.00014798	0.00012847	0.00015142	0.00093969	0.00034189	2.83333	1.5	2	10	4.08333
TP53	cellular tumor antigen p53 isoform a [Homo sapiens]	5.75709	0.00596516	0.0231108	0.0174508	0.0106496	0.0170704	109	78	25	70.6667	0.0022858	0.00244079	0.002543	0.00459085	0.00296511	43	28	33	48	38
INA	alpha-internexin [Homo sapiens]	5.6828	0.000116357	0.00100192	0.00123342	0.0010117	0.00108235	6	7	3.01554	5.33851	0.00016746	0.00027531	0.00024374	7.533e-05	0.00019046	4	4.01013	4.016	1	3.25653
IFT22	rab-like protein 5 isoform a [Homo sapiens]	5.49411	0.0122198	0.00180165	0.00380217	0.00452466	0.00337616	4	8	5	5.66667	0.00112925	0.00055554	0.0001637	0.00060953	0.000614505	10	3	1	3	4.25
PRDX4	peroxiredoxin-4 precursor [Homo sapiens]	5.16517	0.000726126	0.00276729	0.00259558	0.00185327	0.00240538	9	8	3	6.66667	0.00023127	0.00037924	0.00055876	0.0006935	0.000465693	3	3	5	5	4
C4B	3 genes:C4A,C4B,C4B_2. 1 proteins in this group did not match any genes. gi|178557739|ref|NP_001002029.3|:C4B:complement C4-B preproprotein [Homo sapiens] ;gi|338858017|ref|NP_001229752.1|:C4B_2:complement C4-B-like preproprotein [Homo sapiens] ;gi|356582273|ref|NP_001239133.1|:C4A:complement C4-A isoform 2 preproprotein [Homo sapiens] ;gi|578841949|ref|XP_006726010.1|:PREDICTED: complement C4-A …	4.13145	5.45572e-05	0.00047779	0.00040333	0.00038397	0.000421697	10	8	4	7.33333	9.583e-05	0.00011786	8.683e-05	0.00010776	0.00010207	8	6	5	5	6
PCCA	propionyl-CoA carboxylase alpha chain, mitochondrial isoform a precursor [Homo sapiens]	4.09267	0.011992	0.0171688	0.0291071	0.0142576	0.0201779	150	241	62	151	0.00218095	0.00550578	0.00640642	0.00562782	0.00493024	76	117	154	109	114
HSPA9	stress-70 protein, mitochondrial precursor [Homo sapiens]	3.75063	0.0153007	0.00576779	0.00673359	0.00271213	0.00507117	47	52	11	36.6667	0.0011384	0.00116044	0.00133807	0.00177143	0.00135209	37	23	30	32	30.5
MCCC2	methylcrotonoyl-CoA carboxylase beta chain, mitochondrial [Homo sapiens]	3.35676	0.000233595	0.0711898	0.0555974	0.0669054	0.0645642	481	356	225	354	0.0136553	0.0242789	0.0168369	0.0221653	0.0192341	368	399	313	332	353
RPL21	60S ribosomal protein L21 [Homo sapiens]	3.0174	0.0071427	0.0046871	0.00384673	0.00627796	0.00493726	9	7	6	7.33333	0.00078342	0.00128468	0.0018928	0.00258415	0.00163626	6	6	10	11	8.25

## Sheet: NT BICD2
				BioID-BICD2										BioID control
				distributed normalized spectral abundance factor (dNSAF)					distributed Spectral Counts					distributed normalized spectral abundance factor (dNSAF)					distributed Spectral Counts
NCBI_Gene	Description	enrichment ratio	p-value	dNSAF 1	dNSAF 2	dNSAF 3	dNSAF 4	avg dNSAF	dSC 1	dSC 2	dSC 3	dSC 4	avg dSCs	dNSAF 1	dNSAF 2	dNSAF 3	dNSAF 4	avg dNSAF	dSC 1	dSC 2	dSC 3	dSC 4	avg dSCs
BICD1	protein bicaudal D homolog 1 isoform 1 [Homo sapiens]	∞	0.000152996	0.00037971	0.00042861	0.00063054	0.00058181	0.000505168	8	8.5	8	10.5	8.75	0	0	0	0	0	0	0	0	0	0
BICD1	protein bicaudal D homolog 1 isoform 2 [Homo sapiens]	∞	0.000152978	0.00044338	0.00050047	0.00073626	0.00067935	0.000589865	8	8.5	8	10.5	8.75	0	0	0	0	0	0	0	0	0	0
FAM83B	PREDICTED: protein FAM83B isoform X1 [Homo sapiens]	∞	0.00109933	9.155e-05	0.00019451	0.00015202	0.00010687	0.000136237	2	4	2	2	2.5	0	0	0	0	0	0	0	0	0	0
TMEM201	1 genes:TMEM201. 1 proteins in this group did not match any genes. gi|262399371|ref|NP_001124396.2|:TMEM201:transmembrane protein 201 isoform 1 [Homo sapiens] ;gi|578798547|ref|XP_006710480.1|:TMEM201:PREDICTED: transmembrane protein 201 isoform X2 [Homo sapiens] ;gi|578798549|ref|XP_006710481.1|:PREDICTED: transmembrane protein 201 isoform X3 [Homo sapiens] ;	∞	0.0470807	6.949e-05	0.00051674	0.00011539	0.00032447	0.000256522	1	7	1	4	3.25	0	0	0	0	0	0	0	0	0	0
TMEM57	macoilin isoform a [Homo sapiens]	∞	0.000564942	0.00069695	0.00125871	0.00069441	0.00105772	0.000926947	10	17	6	13	11.5	0	0	0	0	0	0	0	0	0	0
USP53	1 genes:USP53. 1 proteins in this group did not match any genes. gi|530377852|ref|XP_005263131.1|:PREDICTED: inactive ubiquitin carboxyl-terminal hydrolase 53 isoform X2 [Homo sapiens] ;gi|530377856|ref|XP_005263133.1|:USP53:PREDICTED: inactive ubiquitin carboxyl-terminal hydrolase 53 isoform X4 [Homo sapiens] ;	∞	0.00133854	0.00043129	0.00059565	0.00028648	0.0003021	0.00040388	10	13	4	6	8.25	0	0	0	0	0	0	0	0	0	0
BICD2	protein bicaudal D homolog 2 isoform 1 [Homo sapiens]	137.327	2.53626e-06	0.17055	0.188604	0.224701	0.201187	0.196261	3151	3280	2500	3184	3028.75	0.00180813	0.00140238	0.00127515	0.00123094	0.00142915	74	35	36	28	43.25
HERC2	1 genes:HERC2. 1 proteins in this group did not match any genes. gi|126032348|ref|NP_004658.3|:HERC2:E3 ubiquitin-protein ligase HERC2 [Homo sapiens] ;gi|530405222|ref|XP_005268334.1|:PREDICTED: E3 ubiquitin-protein ligase HERC2 isoform X3 [Homo sapiens] ;	32.7718	0.000317947	0.000718	0.00062039	0.00076307	0.00039116	0.000623155	75	61	48	35	54.75	3.025e-05	0	0	7.78e-06	1.9015e-05	7	0	0	1	2
TTC17	PREDICTED: tetratricopeptide repeat protein 17 isoform X1 [Homo sapiens]	24.8809	2.95597e-05	0.00046355	0.00041038	0.00057732	0.00040586	0.000464277	12	10	9	9	10	8.72e-06	2.86e-05	0	0	1.866e-05	0.5	1	0	0	0.375
CCDC138	coiled-coil domain-containing protein 138 [Homo sapiens]	17.1933	0.00424615	0.00048713	0.00022179	0.00052002	0.00024372	0.000368165	7	3	4.5	3	4.375	1.571e-05	2.576e-05	2.277e-05	0	2.14133e-05	0.5	0.5	0.5	0	0.375
USP54	1 genes:USP54. 5 proteins in this group did not match any genes. gi|124001558|ref|NP_689799.3|:USP54:inactive ubiquitin carboxyl-terminal hydrolase 54 [Homo sapiens] ;gi|530393170|ref|XP_005269635.1|:PREDICTED: inactive ubiquitin carboxyl-terminal hydrolase 54 isoform X1 [Homo sapiens] ;gi|578818975|ref|XP_006717708.1|:PREDICTED: inactive ubiquitin carboxyl-terminal hydrolase 54 isoform X6 [Homo …	13.9529	0.0393263	8.244e-05	0.00011678	0.00036507	0.00012833	0.000173155	3	4	8	4	4.75	1.241e-05	0	0	0	1.241e-05	1	0	0	0	0.25
DYNC1LI1	cytoplasmic dynein 1 light intermediate chain 1 [Homo sapiens]	13.9274	0.0214343	0.00396014	0.00214611	0.00058774	0.00255101	0.00231125	44.7551	22.8302	4	24.6957	24.0702	8.433e-05	0.00026201	0.00017372	0.00014374	0.00016595	2.11111	4	3	2	2.77778
DYNC1LI2	cytoplasmic dynein 1 light intermediate chain 2 isoform 1 [Homo sapiens]	10.1333	0.000256879	0.00538445	0.0032146	0.00577919	0.00508452	0.00486569	57.2449	32.1698	37	46.3043	43.1798	0.00071713	0.00041778	0	0.00030559	0.000480167	16.8889	6	0	4	6.72222
DYNC1H1	cytoplasmic dynein 1 heavy chain 1 [Homo sapiens]	9.41526	2.2271e-06	0.00394444	0.00354495	0.00411861	0.00333731	0.00373633	396	335	249	287	316.75	0.00020235	0.0004498	0.00044978	0.00048542	0.000396838	45	61	69	60	58.75
SIPA1L3	1 genes:SIPA1L3. 1 proteins in this group did not match any genes. gi|530416035|ref|XP_005258728.1|:SIPA1L3:PREDICTED: signal-induced proliferation-associated 1-like protein 3 isoform X1 [Homo sapiens] ;gi|530416037|ref|XP_005258729.1|:PREDICTED: signal-induced proliferation-associated 1-like protein 3 isoform X2 [Homo sapiens] ;	7.88164	7.91138e-06	0.00028582	0.00022084	0.00025889	0.00024267	0.000252055	11	8	6	8	8.25	2.346e-05	3.847e-05	3.401e-05	0	3.198e-05	2	2	2	0	1.5
TMEM131	1 genes:TMEM131.gi|150456424|ref|NP_056163.1|:TMEM131:transmembrane protein 131 [Homo sapiens] ;gi|530368574|ref|XP_005263966.1|:TMEM131:PREDICTED: transmembrane protein 131 isoform X1 [Homo sapiens] ;gi|530368576|ref|XP_005263967.1|:TMEM131:PREDICTED: transmembrane protein 131 isoform X2 [Homo sapiens] ;gi|530368578|ref|XP_005263968.1|:TMEM131:PREDICTED: transmembrane protein 131 isoform X3 [Hom…	7.72233	7.89953e-06	0.00027034	0.00026109	0.00020406	0.00025822	0.000248428	11	10	5	9	8.75	0	0	3.217e-05	0	3.217e-05	0	0	2	0	0.5
MIB1	E3 ubiquitin-protein ligase MIB1 [Homo sapiens]	7.55862	6.50145e-06	0.00041401	0.00039096	0.00045834	0.00042962	0.000423233	9	8	6	8	7.75	0.00010383	3.405e-05	3.01e-05	0	5.59933e-05	5	1	1	0	1.75
RGPD6	RANBP2-like and GRIP domain-containing protein 5/6 isoform 1 [Homo sapiens]	7.50388	0.0355965	6.55e-06	0.00011374	5.442e-05	7.652e-05	6.28075e-05	0.25	4.08333	1.25	2.5	2.02083	0	0	0	8.37e-06	8.37e-06	0	0	0	0.392857	0.0982143
DYNC1I2	1 genes:DYNC1I2. 2 proteins in this group did not match any genes. gi|422398885|ref|NP_001258714.1|:DYNC1I2:cytoplasmic dynein 1 intermediate chain 2 isoform 1 [Homo sapiens] ;gi|422398887|ref|NP_001258716.1|:DYNC1I2:cytoplasmic dynein 1 intermediate chain 2 isoform 2 [Homo sapiens] ;gi|422398896|ref|NP_001258717.1|:DYNC1I2:cytoplasmic dynein 1 intermediate chain 2 isoform 3 [Homo sapiens] ;gi|53…	7.43017	0.0100822	0.00050775	0.00015412	0.0002409	0.00050807	0.00035271	7	2	2	6	4.25	0	0	4.747e-05	0	4.747e-05	0	0	1	0	0.25
PLEC	plectin isoform 1e [Homo sapiens]	6.88526	0.00534759	7.159e-05	8.297e-05	0.000176	0.00015251	0.000120767	7	7.63636	10.3636	12.7742	9.44355	2.457e-05	0	0	1.051e-05	1.754e-05	5.32258	0	0	1.26471	1.64682
CEP170B	centrosomal protein of 170 kDa protein B isoform 2 [Homo sapiens]	6.37776	0.00501156	0.00018279	6.473e-05	0.00010118	0.00014226	0.00012274	6	2	2	4	3.5	1.375e-05	0	0	2.474e-05	1.9245e-05	1	0	0	1	0.5
TNRC6A	PREDICTED: trinucleotide repeat-containing gene 6A protein isoform X2 [Homo sapiens]	6.07978	9.54653e-05	0.0008225	0.00125929	0.00096411	0.00107315	0.00102976	34	49	24	38	36.25	0.00017473	0.00017908	0.0002058	0.00011789	0.000169375	16	10	13	6	11.25
RANBP2	E3 SUMO-protein ligase RanBP2 [Homo sapiens]	6.06714	3.06569e-05	0.00851059	0.0070689	0.00592687	0.00704119	0.00713689	592.905	463.557	248.651	420.192	431.326	0.00099687	0.00120451	0.00130305	0.00120084	0.00117632	153.84	113.355	138.717	103	127.228
KPNB1	importin subunit beta-1 isoform 1 [Homo sapiens]	5.69385	0.00027499	0.00945624	0.00600515	0.0078953	0.00629057	0.00741181	179	107	90	102	119.5	0.00145475	0.00148609	0.00127916	0.00098689	0.00130172	61	38	37	23	39.75
EIF4ENIF1	1 genes:EIF4ENIF1. 2 proteins in this group did not match any genes. gi|256818796|ref|NP_001157973.1|:EIF4ENIF1:eukaryotic translation initiation factor 4E transporter isoform a [Homo sapiens] ;gi|530420262|ref|XP_005261745.1|:EIF4ENIF1:PREDICTED: eukaryotic translation initiation factor 4E transporter isoform X3 [Homo sapiens] ;gi|578837305|ref|XP_006724344.1|:PREDICTED: eukaryotic translation i…	5.1193	0.00869277	0.00018793	0.00024956	0.00039009	0.00016454	0.00024803	4	5	5	3	4.25	2.121e-05	3.478e-05	6.149e-05	7.632e-05	4.845e-05	1	1	2	2	1.5
PKD1L1	polycystic kidney disease protein 1-like 1 [Homo sapiens]	5.08516	0.0349692	0.00047106	0.00013805	0.00037763	0.00013274	0.00027987	29	8	14	7	14.5	0	9.62e-05	4.252e-05	2.639e-05	5.50367e-05	0	8	4	2	3.5
CENPE	centromere-associated protein E isoform 1 [Homo sapiens]	4.63782	0.00226642	6.853e-05	0.00010921	0.00014226	0.00014001	0.000115003	4	6	5	7	5.5	0	3.805e-05	2.242e-05	1.392e-05	2.47967e-05	0	3	2	1	1.5
NEURL4	1 genes:NEURL4.gi|53829368|ref|NP_001005408.1|:NEURL4:neuralized-like protein 4 isoform 2 [Homo sapiens] ;gi|53829370|ref|NP_115818.2|:NEURL4:neuralized-like protein 4 isoform 1 [Homo sapiens] ;	4.47357	0.00947847	2.967e-05	9.455e-05	9.852e-05	0.00010389	8.16575e-05	1	3	2	3	2.25	1.339e-05	2.196e-05	1.941e-05	0	1.82533e-05	1	1	1	0	0.75
GPATCH1	G patch domain-containing protein 1 [Homo sapiens]	4.38197	0.00722322	0.00089473	0.00126738	0.00181595	0.0008124	0.00119761	18	24	22	14	19.5	0.00017952	0.00025758	0.00029276	0.00036336	0.000273305	8	7	9	9	8.25
TJP2	tight junction protein ZO-2 isoform 1 [Homo sapiens]	4.248	0.0070813	0.00365553	0.00414879	0.00148529	0.00413131	0.00335523	94	100.421	23	91	77.1053	0.00086023	0.00057577	0.00071259	0.00101076	0.000789838	49	20	28	32	32.25
CEP55	centrosomal protein of 55 kDa [Homo sapiens]	4.24721	0.00274528	0.00039894	0.00074169	0.00049686	0.00046573	0.000525805	4	7	3	4	4.5	0.00022512	0	6.527e-05	8.101e-05	0.0001238	5	0	1	1	1.75
NUP88	nuclear pore complex protein Nup88 [Homo sapiens]	4.21635	0.000115623	0.00206094	0.00245487	0.0025927	0.00298923	0.00252444	33	37	25	41	34	0.00062025	0.00087841	0.00049044	0.0004058	0.000598725	22	19	12	8	15.25
TAB1	TGF-beta-activated kinase 1 and MAP3K7-binding protein 1 isoform alpha [Homo sapiens]	4.21363	0.000533364	0.00348917	0.00380433	0.00259208	0.00450207	0.00359691	38	39	17	42	34	0.00082902	0.00108756	0.00090134	0.00059663	0.000853637	20	16	15	8	14.75
ALMS1	Alstrom syndrome protein 1 [Homo sapiens]	4.14569	0.0016458	0.00053282	0.00062501	0.00036866	0.0003758	0.000475572	48	53	20	29	37.5	6.013e-05	0.00017256	0.00010896	0.00011721	0.000114715	12	21	15	13	15.25
MAST2	microtubule-associated serine/threonine-protein kinase 2 [Homo sapiens]	4.04146	0.0152284	7.721e-05	0.00021094	0.00034192	0.00024038	0.000217613	3	7.71429	8	8	6.67857	0	5.716e-05	5.053e-05	0	5.3845e-05	0	3	3	0	1.5
LRCH2	leucine-rich repeat and calponin homology domain-containing protein 2 isoform 1 [Homo sapiens]	4.00198	0.0128955	0.00012099	0.00025706	0.00020091	0.0003531	0.000233015	2	4	2	5	3.25	5.462e-05	8.956e-05	3.959e-05	4.913e-05	5.8225e-05	2	2	1	1	1.5
ARF3	PREDICTED: ADP-ribosylation factor 3 isoform X1 [Homo sapiens]	3.93883	0.0147766	0.00076703	0.00067906	0.001486	0.00052234	0.000863608	3	2.5	3.5	1.75	2.6875	0.00023084	0	0	0.00020767	0.000219255	2	0	0	1	0.75
RGPD1	RANBP2-like and GRIP domain-containing protein 1 [Homo sapiens]	3.86621	0.0467134	6.104e-05	0.00022044	9.786e-05	0.00017952	0.000139715	2.30574	7.83752	2.22597	5.80838	4.5444	1.386e-05	9.104e-05	3.658e-05	3.07e-06	3.61375e-05	1.16	4.64516	2.11141	0.142857	2.01486
TANC1	1 genes:TANC1. 1 proteins in this group did not match any genes. gi|530371093|ref|XP_005246975.1|:TANC1:PREDICTED: protein TANC1 isoform X1 [Homo sapiens] ;gi|530371095|ref|XP_005246976.1|:PREDICTED: protein TANC1 isoform X2 [Homo sapiens] ;gi|578805057|ref|XP_006712873.1|:TANC1:PREDICTED: protein TANC1 isoform X4 [Homo sapiens] ;	3.84973	0.00436758	0.00022261	0.0004467	0.00024644	0.0003465	0.000315562	9	17	6	12	11	0.00011166	5.493e-05	8.093e-05	8.036e-05	8.197e-05	10	3	5	4	5.5
DIS3L	1 genes:DIS3L. 1 proteins in this group did not match any genes. gi|219521928|ref|NP_001137160.1|:DIS3L:DIS3-like exonuclease 1 isoform 1 [Homo sapiens] ;gi|530405353|ref|XP_005254201.1|:PREDICTED: DIS3-like exonuclease 1 isoform X1 [Homo sapiens] ;	3.69615	0.00212271	0.00057078	0.00097954	0.00087492	0.0007176	0.00078571	13	21	12	14	15	0.00039642	0	2.873e-05	0	0.000212575	20	0	1	0	5.25
PLK1	serine/threonine-protein kinase PLK1 [Homo sapiens]	3.66086	0.0194838	0.00107444	0.00065225	0.00038233	0.00053756	0.000661645	14	8	3	6	7.75	0.00027716	0.00017044	0.00015067	0.00012467	0.000180735	8	3	3	2	4
ABI2	PREDICTED: abl interactor 2 isoform X14 [Homo sapiens]	3.65102	0.0290405	0.00017108	0.00027263	0.00042614	9.986e-05	0.000242427	2	3	3	1	2.25	0	6.332e-05	0	6.948e-05	6.64e-05	0	1	0	1	0.5
CAPZA1	F-actin-capping protein subunit alpha-1 [Homo sapiens]	3.57074	0.0187038	0.00155337	0.00212727	0.00080609	0.00239271	0.00171986	9.6	12.375	3	12.6667	9.41042	0.00106109	0	0.00012102	0.00026285	0.000481653	14.5263	0	1.14286	2	4.41729
CAPZB	F-actin-capping protein subunit beta isoform 1 [Homo sapiens]	3.55547	0.0260923	0.00170138	0.00126524	0.00042379	0.0009931	0.00109588	10	7	1.5	5	5.875	0.00057604	0.00012595	0.00022268	0	0.000308223	7.5	1	2	0	2.625
NUP62	nuclear pore glycoprotein p62 [Homo sapiens]	3.42854	0.00260126	0.00195039	0.00150693	0.00117774	0.00134545	0.00149513	22	16	8	13	14.75	0.00080043	0.00039377	0.00040612	0.00014401	0.000436082	20	6	7	2	8.75
CEP192	centrosomal protein of 192 kDa [Homo sapiens]	3.33758	0.00280044	0.00016417	0.00025838	0.0003332	0.00026831	0.000256015	9	13.3333	11	12.6	11.4833	9.47e-05	0	8.356e-05	5.186e-05	7.67067e-05	11.5	0	7	3.5	5.5
HSPD1	PREDICTED: 60 kDa heat shock protein, mitochondrial isoform X1 [Homo sapiens]	3.32804	0.000105185	0.00145374	0.00163021	0.00201172	0.0017914	0.00172177	18	19	15	19	17.75	0.00051043	0.0004783	0.00068709	0.00039359	0.000517352	14	8	13	6	10.25
RANGAP1	1 genes:RANGAP1.gi|530420276|ref|XP_005261752.1|:RANGAP1:PREDICTED: ran GTPase-activating protein 1 isoform X1 [Homo sapiens] ;gi|530420278|ref|XP_005261753.1|:RANGAP1:PREDICTED: ran GTPase-activating protein 1 isoform X2 [Homo sapiens] ;gi|578837322|ref|XP_006724352.1|:RANGAP1:PREDICTED: ran GTPase-activating protein 1 isoform X3 [Homo sapiens] ;	3.30221	0.00110284	0.00771291	0.00957236	0.0126882	0.0122019	0.0105438	107	125	106	145	120.75	0.0023104	0.002508	0.00367947	0.00427398	0.00319296	71	47	78	73	67.25
SVIL	1 genes:SVIL. 4 proteins in this group did not match any genes. gi|150417971|ref|NP_003165.2|:SVIL:supervillin isoform 1 [Homo sapiens] ;gi|530392393|ref|XP_005252623.1|:PREDICTED: supervillin isoform X3 [Homo sapiens] ;gi|530392399|ref|XP_005252626.1|:PREDICTED: supervillin isoform X6 [Homo sapiens] ;gi|578818555|ref|XP_006717558.1|:PREDICTED: supervillin isoform X14 [Homo sapiens] ;gi|578818557…	3.19477	0.0405031	7.765e-05	0.00019248	0.00025788	0.00042301	0.000237755	3	7	6	14	7.5	0	0.00011496	3.388e-05	0	7.442e-05	0	6	2	0	2
SYNJ2	1 genes:SYNJ2. 2 proteins in this group did not match any genes. gi|26190608|ref|NP_003889.1|:SYNJ2:synaptojanin-2 isoform 1 [Homo sapiens] ;gi|530384171|ref|XP_005267254.1|:PREDICTED: synaptojanin-2 isoform X1 [Homo sapiens] ;gi|578813039|ref|XP_006715654.1|:PREDICTED: synaptojanin-2 isoform X7 [Homo sapiens] ;	3.19065	0.0130213	6.187e-05	0.00013145	0.00010274	0.00018056	0.000119155	2	4	2	5	3.25	1.396e-05	0	6.073e-05	0	3.7345e-05	1	0	3	0	1
KIAA1671	PREDICTED: uncharacterized protein KIAA1671 isoform X3 [Homo sapiens]	3.16452	0.0304667	0.00161433	0.00122501	0.00038296	0.00122648	0.0011122	63	45	9	41	39.5	0.00031233	0.00017072	0.00040246	0.00052032	0.000351457	27	9	24	25	21.25
LUZP1	leucine zipper protein 1 [Homo sapiens]	3.02047	0.0157018	0.00081717	0.00109659	0.00042852	0.00120502	0.000886825	19	24	6	24	18.25	0.0002524	0.00031838	0.00039404	0.0002096	0.000293605	13	10	14	6	10.75
IFT22	rab-like protein 5 isoform a [Homo sapiens]	3.00701	0.00742609	0.00200119	0.00239175	0.00124618	0.00175216	0.00184782	8	9	3	6	6.5	0.00112925	0.00055554	0.0001637	0.00060953	0.000614505	10	3	1	3	4.25

## Sheet: NT HOOK1
				BioID-HOOK1										BioID control
				distributed normalized spectral abundance factor (dNSAF)					distributed Spectral Counts					distributed normalized spectral abundance factor (dNSAF)					distributed Spectral Counts
NCBI_Gene	Description	enrichment ratio	p-value	dNSAF 1	dNSAF 2	dNSAF 3	dNSAF 4	avg dNSAF	dSC 1	dSC 2	dSC 3	dSC 4	avg dSCs	dNSAF 1	dNSAF 2	dNSAF 3	dNSAF 4	avg dNSAF	dSC 1	dSC 2	dSC 3	dSC 4	avg dSCs
AMER1	APC membrane recruitment protein 1 [Homo sapiens]	∞	0.0152612	0.00037263	0.00016674	6.949e-05	0.00029796	0.000226705	12	6	2	6	6.5	0	0	0	0	0	0	0	0	0	0
BRPF1	peregrin isoform 2 [Homo sapiens]	∞	0.00106475	0.00032902	0.00056119	0.00038984	0.00025535	0.00038385	11.3333	21.6	12	5.5	12.6083	0	0	0	0	0	0	0	0	0	0
BRPF1	PREDICTED: peregrin isoform X1 [Homo sapiens]	∞	0.00262761	0.00064063	0.00036422	0.00037952	0.0002486	0.000408243	22.6667	14.4	12	5.5	13.6417	0	0	0	0	0	0	0	0	0	0
DBT	lipoamide acyltransferase component of branched-chain alpha-keto acid dehydrogenase complex, mitochondrial precursor [Homo sapiens]	∞	2.49103e-05	0.00116993	0.00085069	0.00130916	0.00116937	0.00112479	16	13	16	10	13.75	0	0	0	0	0	0	0	0	0	0
DHX37	probable ATP-dependent RNA helicase DHX37 [Homo sapiens]	∞	0.0037228	9.139e-05	5.452e-05	3.409e-05	9.743e-05	6.93575e-05	3	2	1	2	2	0	0	0	0	0	0	0	0	0	0
FAM160B1	1 genes:FAM160B1.gi|205277427|ref|NP_065991.3|:FAM160B1:protein FAM160B1 isoform a [Homo sapiens] ;gi|205277429|ref|NP_001128523.1|:FAM160B1:protein FAM160B1 isoform b [Homo sapiens] ;	∞	0.0439627	9.214e-05	0.00020615	0	0.00014736	0.00014855	2	5	0	2	2.25	0	0	0	0	0	0	0	0	0	0
FARP1	1 genes:FARP1. 1 proteins in this group did not match any genes. gi|558472848|ref|NP_001273768.1|:FARP1:FERM, RhoGEF and pleckstrin domain-containing protein 1 isoform 3 [Homo sapiens] ;gi|578825181|ref|XP_006719976.1|:PREDICTED: FERM, RhoGEF and pleckstrin domain-containing protein 1 isoform X1 [Homo sapiens] ;	∞	0.00631418	6.551e-05	5.863e-05	0.00014661	0.00015715	0.000106975	2	2	4	3	2.75	0	0	0	0	0	0	0	0	0	0
FBN2	fibrillin-2 precursor [Homo sapiens]	∞	0.0278825	0	4.333e-05	5.417e-05	3.871e-05	4.54033e-05	0	4	4	2	2.5	0	0	0	0	0	0	0	0	0	0
LRP1B	low-density lipoprotein receptor-related protein 1B precursor [Homo sapiens]	∞	8.54118e-06	7.663e-05	5.487e-05	6.86e-05	6.128e-05	6.5345e-05	10	8	8	5	7.75	0	0	0	0	0	0	0	0	0	0
LRP2	1 genes:LRP2. 1 proteins in this group did not match any genes. gi|126012573|ref|NP_004516.2|:LRP2:low-density lipoprotein receptor-related protein 2 precursor [Homo sapiens] ;gi|578804333|ref|XP_006712589.1|:PREDICTED: low-density lipoprotein receptor-related protein 2 isoform X1 [Homo sapiens] ;	∞	0.000339998	2.271e-05	4.065e-05	2.542e-05	3.632e-05	3.1275e-05	3	6	3	3	3.75	0	0	0	0	0	0	0	0	0	0
RAB21	ras-related protein Rab-21 [Homo sapiens]	∞	0.00599136	0.00031328	0.00056073	0.00052584	0.00100202	0.000600467	2	4	3	4	3.25	0	0	0	0	0	0	0	0	0	0
UBE3C	ubiquitin-protein ligase E3C [Homo sapiens]	∞	0.000309246	6.509e-05	5.825e-05	7.283e-05	0.00010409	7.5065e-05	2	2	2	2	2	0	0	0	0	0	0	0	0	0	0
HOOK1	PREDICTED: protein Hook homolog 1 isoform X1 [Homo sapiens]	178.051	4.72555e-08	0.0854933	0.0755542	0.0760491	0.0771856	0.0785705	1765.94	1743.88	1403.8	996.94	1477.64	0.00045915	0.00061175	0.0003328	0.00036142	0.00044128	16	13	8	7	11
FAM160A2	1 genes:FAM160A2.gi|149393138|ref|NP_001092264.1|:FAM160A2:FTS and Hook-interacting protein isoform 2 [Homo sapiens] ;gi|578820852|ref|XP_006718406.1|:FAM160A2:PREDICTED: FTS and Hook-interacting protein isoform X3 [Homo sapiens] ;	33.4878	8.92599e-06	0.00174045	0.00136287	0.00137953	0.00127572	0.00143964	48	42	34	22	36.5	4.299e-05	0	0	0	4.299e-05	2	0	0	0	0.5
HOOK3	protein Hook homolog 3 [Homo sapiens]	15.8503	0.000875556	0.00088654	0.00132308	0.00171352	0.0009467	0.00121746	18.0607	30.1188	31.1957	12.0598	22.8588	5.819e-05	9.543e-05	0	0	7.681e-05	2	2	0	0	1
RAD50	DNA repair protein RAD50 [Homo sapiens]	14.1723	2.20126e-06	0.00252512	0.00274059	0.00279556	0.00223392	0.0025738	94	114	93	52	88.25	7.962e-05	0.00031334	0.00016158	0.00017189	0.000181608	5	12	7	6	7.5
FAM160A1	PREDICTED: protein FAM160A1 isoform X1 [Homo sapiens]	13.9026	0.00012563	0.00243998	0.00172868	0.00170647	0.00157168	0.0018617	72	57	45	29	50.75	0.0001607	9.882e-05	0.00020384	7.228e-05	0.00013391	8	3	7	2	5
KIF1B	kinesin-like protein KIF1B isoform alpha [Homo sapiens]	10.5725	2.84876e-05	0.00090683	0.00077579	0.00062329	0.00073326	0.000759792	29.6667	28.3595	18.2222	15	22.8121	0.00010871	0	3.502e-05	0	7.1865e-05	6	0	1.33333	0	1.83333
UBR5	1 genes:UBR5. 4 proteins in this group did not match any genes. gi|15147337|ref|NP_056986.2|:UBR5:E3 ubiquitin-protein ligase UBR5 isoform 1 [Homo sapiens] ;gi|530389102|ref|XP_005251013.1|:PREDICTED: E3 ubiquitin-protein ligase UBR5 isoform X1 [Homo sapiens] ;gi|530389104|ref|XP_005251014.1|:PREDICTED: E3 ubiquitin-protein ligase UBR5 isoform X2 [Homo sapiens] ;gi|530389108|ref|XP_005251016.1|:P…	9.9847	0.00494044	0.00065477	0.00052962	0.00038043	0.00022151	0.000446583	52	47	27	11	34.25	0	8.568e-05	2.164e-05	2.686e-05	4.47267e-05	0	7	2	2	2.75
KRT19	keratin, type I cytoskeletal 19 [Homo sapiens]	8.32435	0.000103735	0.0033482	0.00275982	0.00286297	0.00241306	0.00284601	38	35	29.0374	17.125	29.7906	0.00014798	0.00012847	0.00015142	0.00093969	0.00034189	2.83333	1.5	2	10	4.08333
AKTIP	PREDICTED: AKT-interacting protein isoform X5 [Homo sapiens]	7.73888	0.0117301	0.00336805	0.0022606	0.00349965	0.00673285	0.00396529	28	21	26	35	27.5	0.00064171	0.00058461	0.00031008	0.00051314	0.000512385	9	5	3	4	5.25
DYNC1LI1	cytoplasmic dynein 1 light intermediate chain 1 [Homo sapiens]	7.13039	0.00515753	0.00180505	0.000784	0.00128194	0.00086216	0.00118329	26.7857	13	17	8	16.1964	8.433e-05	0.00026201	0.00017372	0.00014374	0.00016595	2.11111	4	3	2	2.77778
ACACA	acetyl-CoA carboxylase 1 isoform 1 [Homo sapiens]	6.98494	1.70675e-07	0.00744669	0.00746497	0.00781154	0.00775797	0.00762029	503.5	564	472	328	466.875	0.00053916	0.00156699	0.00129947	0.00095822	0.00109096	61.5	109	102.25	60.75	83.375
ACACA	acetyl-CoA carboxylase 1 isoform 2 [Homo sapiens]	6.98493	1.70682e-07	0.00756413	0.0075827	0.00793474	0.00788033	0.00774048	503.5	564	472	328	466.875	0.00054766	0.00159171	0.00131996	0.00097334	0.00110817	61.5	109	102.25	60.75	83.375
AP4B1	AP-4 complex subunit beta-1 isoform 1 [Homo sapiens]	6.93998	0.0172676	0.00052461	0.0004268	0.00010673	0.00022881	0.000321738	11	10	2	3	6.5	0	4.636e-05	0	0	4.636e-05	0	1	0	0	0.25
ZNF326	DBIRD complex subunit ZNF326 isoform 1 [Homo sapiens]	6.73647	0.00215213	0.00102947	0.00065033	0.00142303	0.0008716	0.000993608	17	12	21	9	14.75	0	0.00011773	0.00026018	6.458e-05	0.000147497	0	2	5	1	2
KRI1	protein KRI1 homolog [Homo sapiens]	6.0557	0.00241277	0.00164042	0.00191291	0.00339315	0.00270291	0.00241235	33	43	61	34	42.75	0.00032412	0.00028991	0.00055529	0.00042412	0.00039836	11	6	13	8	9.5
MCCC1	methylcrotonoyl-CoA carboxylase subunit alpha, mitochondrial precursor [Homo sapiens]	6.00753	6.4316e-05	0.0641201	0.05251	0.0625574	0.0789867	0.0645436	1319	1207	1150	1016	1173	0.010777	0.0119549	0.0106519	0.00959132	0.0107438	374	253	255	185	266.75
TNIK	1 genes:TNIK.gi|239735580|ref|NP_001155032.1|:TNIK:TRAF2 and NCK-interacting protein kinase isoform 2 [Homo sapiens] ;gi|239735582|ref|NP_001155033.1|:TNIK:TRAF2 and NCK-interacting protein kinase isoform 3 [Homo sapiens] ;gi|239735584|ref|NP_001155034.1|:TNIK:TRAF2 and NCK-interacting protein kinase isoform 4 [Homo sapiens] ;gi|239735586|ref|NP_001155035.1|:TNIK:TRAF2 and NCK-interacting protein…	5.56247	0.0468995	0.00013034	9.332e-05	0.00011668	0	0.000113447	5	4	4	0	3.25	1.545e-05	2.534e-05	0	0	2.0395e-05	1	1	0	0	0.5
HYOU1	1 genes:HYOU1.gi|195976805|ref|NP_001124463.1|:HYOU1:hypoxia up-regulated protein 1 precursor [Homo sapiens] ;gi|530397769|ref|XP_005271451.1|:HYOU1:PREDICTED: hypoxia up-regulated protein 1 isoform X6 [Homo sapiens] ;	5.51536	1.02133e-05	0.00024696	0.00025258	0.00019739	0.00022568	0.000230653	7	8	5	4	6	4.182e-05	0	0	0	4.182e-05	2	0	0	0	0.5
PCCB	propionyl-CoA carboxylase beta chain, mitochondrial isoform 1 precursor [Homo sapiens]	5.35434	3.7301e-06	0.0298824	0.0317164	0.0279507	0.0290706	0.029655	457	542	382	278	414.75	0.0018992	0.00788129	0.00623677	0.00613675	0.0055385	49	124	111	88	93
NBN	nibrin [Homo sapiens]	5.30847	9.70602e-06	0.00200995	0.00204973	0.00177839	0.00179407	0.00190803	43	49	34	24	37.5	0.00022166	0.00045435	0.00056232	0.0001994	0.000359433	8	10	14	4	9
PCCA	propionyl-CoA carboxylase alpha chain, mitochondrial isoform a precursor [Homo sapiens]	5.1636	3.35599e-05	0.0225118	0.0243055	0.024974	0.0300399	0.0254578	465	561	461	388	468.75	0.00218095	0.00550578	0.00640642	0.00562782	0.00493024	76	117	154	109	114
MTPAP	poly(A) RNA polymerase, mitochondrial precursor [Homo sapiens]	5.11778	6.65669e-05	0.00078724	0.00059613	0.00060987	0.00077476	0.000692	13	11	9	8	10.25	0.00014358	0.00017659	0.00015611	6.458e-05	0.000135215	4	3	3	1	2.75
NOC2L	nucleolar complex protein 2 homolog [Homo sapiens]	4.77734	0.00134436	0.00037644	0.00046322	0.00063186	0.00037626	0.000461945	8	11	12	5	9	2.789e-05	0.00013722	0.0001213	0.00010037	9.6695e-05	1	3	3	2	2.25
AASS	alpha-aminoadipic semialdehyde synthase, mitochondrial [Homo sapiens]	4.43139	0.00354047	0.00011418	0.00020437	0.00012777	0.00024347	0.000172448	3	6	3	4	4	4.512e-05	0	3.271e-05	0	3.8915e-05	2	0	1	0	0.75
MTHFD1L	1 genes:MTHFD1L.gi|337756501|ref|NP_001229696.1|:MTHFD1L:monofunctional C1-tetrahydrofolate synthase, mitochondrial isoform 1 precursor [Homo sapiens] ;gi|337756507|ref|NP_001229697.1|:MTHFD1L:monofunctional C1-tetrahydrofolate synthase, mitochondrial isoform 3 [Homo sapiens] ;gi|36796743|ref|NP_056255.2|:MTHFD1L:monofunctional C1-tetrahydrofolate synthase, mitochondrial isoform 2 precursor [Homo…	4.41537	0.0139074	7.2e-05	0.00022552	0.00020142	0.00011515	0.000153522	2	7	5	2	4	0	3.499e-05	3.093e-05	3.839e-05	3.477e-05	0	1	1	1	0.75
USP54	1 genes:USP54. 5 proteins in this group did not match any genes. gi|124001558|ref|NP_689799.3|:USP54:inactive ubiquitin carboxyl-terminal hydrolase 54 [Homo sapiens] ;gi|530393170|ref|XP_005269635.1|:PREDICTED: inactive ubiquitin carboxyl-terminal hydrolase 54 isoform X1 [Homo sapiens] ;gi|578818975|ref|XP_006717708.1|:PREDICTED: inactive ubiquitin carboxyl-terminal hydrolase 54 isoform X6 [Homo …	4.14263	0.0326076	2.093e-05	3.746e-05	4.684e-05	0.00010041	5.141e-05	1	2	2	3	2	1.241e-05	0	0	0	1.241e-05	1	0	0	0	0.25
ACE	angiotensin-converting enzyme isoform 1 precursor [Homo sapiens]	4.1027	0.00817481	0.00086356	0.00086943	0.00099653	0.00168314	0.00110317	32	36	33	39	35	0.00011197	0.00052463	0.0002087	0.00023025	0.000268887	7	20	9	8	11
TMED5	transmembrane emp24 domain-containing protein 5 isoform 1 precursor [Homo sapiens]	4.03142	0.00296037	0.00030781	0.00068866	0.00051666	0.00049226	0.000501348	2	5	3	2	3	9.123e-05	0.0001496	0.00013225	0	0.00012436	1	1	1	0	0.75
MCCC2	methylcrotonoyl-CoA carboxylase beta chain, mitochondrial [Homo sapiens]	3.96233	0.00207296	0.056591	0.0684038	0.0731326	0.10672	0.0762119	904	1221	1044	1066	1058.75	0.0136553	0.0242789	0.0168369	0.0221653	0.0192341	368	399	313	332	353
SLC25A11	mitochondrial 2-oxoglutarate/malate carrier protein isoform 1 [Homo sapiens]	3.89136	0.0487478	0.00269382	0.00190852	0.001256	0.00053851	0.00159921	24	19	10	3	14	0.00079839	0.00043641	0.00028935	0.00011971	0.000410965	12	4	3	1	5
LENG8	PREDICTED: leukocyte receptor cluster member 8 isoform X12 [Homo sapiens]	3.71981	0.042648	0.00057272	0.00027598	0.00024649	7.045e-05	0.00029141	13	7	5	1	6.5	7.834e-05	0	0	0	7.834e-05	3	0	0	0	0.75
DYNC1H1	cytoplasmic dynein 1 heavy chain 1 [Homo sapiens]	3.71384	1.06913e-05	0.0015627	0.00146638	0.00151947	0.00134661	0.00147379	206	216	179	111	178	0.00020235	0.0004498	0.00044978	0.00048542	0.000396838	45	61	69	60	58.75
TCP1	T-complex protein 1 subunit alpha isoform a [Homo sapiens]	3.37441	0.00209514	0.00919138	0.01231	0.00985959	0.00618377	0.00938619	145	217	139	61	140.5	0.00259261	0.00227977	0.00294134	0.00331258	0.00278157	69	37	54	49	52.25
RBM14	RNA-binding protein 14 isoform 1 [Homo sapiens]	3.34334	0.00760631	0.00079023	0.00136724	0.00147378	0.00092676	0.0011395	15	29	25	11	20	0.00021859	0.00015362	0.00031688	0.00067422	0.000340827	7	3	7	12	7.25
HNRNPH1	heterogeneous nuclear ribonucleoprotein H [Homo sapiens]	3.32828	0.00220147	0.00210125	0.00275929	0.00239883	0.00141223	0.0021679	26.7692	39.2799	27.3103	11.25	26.1524	0.00062779	0.00050357	0.00088134	0.00059273	0.000651358	13.4928	6.6	13.0667	7.08042	10.06
PC	PREDICTED: pyruvate carboxylase, mitochondrial isoform X5 [Homo sapiens]	3.3204	0.000539049	0.0417365	0.0363067	0.0417484	0.0570813	0.0442182	1395	1356	1247	1193	1297.75	0.0164576	0.0132321	0.012443	0.0111359	0.0133172	928	455	484	349	554
ARF1	ADP-ribosylation factor 1 [Homo sapiens]	3.29944	0.00750181	0.00204455	0.00331091	0.00283259	0.00217981	0.00259196	10.5	19	13	7	12.375	0.00023084	0.00105451	0.00164929	0.00020767	0.000785578	2	5.57143	9.85714	1	4.60714
DCTN1	1 genes:DCTN1.gi|205277392|ref|NP_001128512.1|:DCTN1:dynactin subunit 1 isoform 3 [Homo sapiens] ;gi|299890871|ref|NP_001177765.1|:DCTN1:dynactin subunit 1 isoform 5 [Homo sapiens] ;	3.16876	0.00544759	0.00045005	0.00072999	0.0003777	0.00053979	0.000524383	16	29	12	12	17.25	6.669e-05	0.00024607	0.00016919	0.00017999	0.000165485	4	9	7	6	6.5
PLEC	plectin isoform 1e [Homo sapiens]	3.16705	0.00337234	4.673e-05	7.19e-05	6.62e-05	3.737e-05	5.555e-05	6	10.315	7.59574	3	6.72768	2.457e-05	0	0	1.051e-05	1.754e-05	5.32258	0	0	1.26471	1.64682
HSPH1	heat shock protein 105 kDa isoform 1 [Homo sapiens]	3.11571	0.0479033	4.108e-05	0.00014704	0.00022983	0.00026277	0.00017018	1	4	5	4	3.5	4.87e-05	7.986e-05	3.53e-05	0	5.462e-05	2	2	1	0	1.25

## Sheet: NT HOOK3
				BioID-HOOK3										BioID control
				distributed normalized spectral abundance factor (dNSAF)					distributed Spectral Counts					distributed normalized spectral abundance factor (dNSAF)					distributed Spectral Counts
NCBI_Gene	Description	enrichment ratio	p-value	dNSAF 1	dNSAF 2	dNSAF 3	dNSAF 4	avg dNSAF	dSC 1	dSC 2	dSC 3	dSC 4	avg dSCs	dNSAF 1	dNSAF 2	dNSAF 3	dNSAF 4	avg dNSAF	dSC 1	dSC 2	dSC 3	dSC 4	avg dSCs
BRPF1	peregrin isoform 2 [Homo sapiens]	∞	0.0248877	0.00011798	0.00010078	0.00010449	0	0.00010775	3.5	4	3.5	0	2.75	0	0	0	0	0	0	0	0	0	0
BRPF1	PREDICTED: peregrin isoform X1 [Homo sapiens]	∞	0.0248871	0.00011486	9.812e-05	0.00010173	0	0.000104903	3.5	4	3.5	0	2.75	0	0	0	0	0	0	0	0	0	0
RAB21	ras-related protein Rab-21 [Homo sapiens]	∞	0.0453366	0.00054564	0.00027189	0.00064434	0	0.00048729	3	2	4	0	2.25	0	0	0	0	0	0	0	0	0	0
RCN2	1 genes:RCN2.gi|426214088|ref|NP_001258766.1|:RCN2:reticulocalbin-2 isoform b precursor [Homo sapiens] ;gi|4506457|ref|NP_002893.1|:RCN2:reticulocalbin-2 isoform a precursor [Homo sapiens] ;	∞	0.0246209	0.00012216	0.00018261	0.00054096	0.00059161	0.000359335	1	2	5	3	2.75	0	0	0	0	0	0	0	0	0	0
TPM3	tropomyosin alpha-3 chain isoform 4 [Homo sapiens]	∞	0.0294033	0.00066005	0.00061669	0.00043844	0	0.000571727	4	5	3	0	3	0	0	0	0	0	0	0	0	0	0
HOOK3	protein Hook homolog 3 [Homo sapiens]	824.721	2.88292e-05	0.0789774	0.059365	0.0525702	0.0624747	0.0633468	1385.67	1393.5	1041.42	679	1124.9	5.819e-05	9.543e-05	0	0	7.681e-05	2	2	0	0	1
FAM160A2	1 genes:FAM160A2.gi|149393138|ref|NP_001092264.1|:FAM160A2:FTS and Hook-interacting protein isoform 2 [Homo sapiens] ;gi|578820852|ref|XP_006718406.1|:FAM160A2:PREDICTED: FTS and Hook-interacting protein isoform X3 [Homo sapiens] ;	75.1306	3.94091e-06	0.00277872	0.00308396	0.00331864	0.00373814	0.00322987	66	98	89	55	77	4.299e-05	0	0	0	4.299e-05	2	0	0	0	0.5
MYH10	myosin-10 isoform 2 [Homo sapiens]	61.4053	0.000621009	0.00368088	0.00302024	0.00437227	0.00204831	0.00328042	177.734	195.11	238.373	61.2667	168.121	3.277e-05	5.733e-05	8.205e-05	4.154e-05	5.34225e-05	3.09917	3.30682	5.35354	2.18367	3.4858
DYNC1LI1	cytoplasmic dynein 1 light intermediate chain 1 [Homo sapiens]	20.7277	0.000171402	0.0038791	0.00302861	0.00255662	0.00429473	0.00343977	49.5753	51.7841	36.8919	34	43.0628	8.433e-05	0.00026201	0.00017372	0.00014374	0.00016595	2.11111	4	3	2	2.77778
FAM160A1	PREDICTED: protein FAM160A1 isoform X1 [Homo sapiens]	12.0736	0.000193687	0.00121982	0.00161763	0.0015334	0.00209623	0.00161677	31	55	44	33	40.75	0.0001607	9.882e-05	0.00020384	7.228e-05	0.00013391	8	3	7	2	5
DYNC1I2	1 genes:DYNC1I2. 2 proteins in this group did not match any genes. gi|422398885|ref|NP_001258714.1|:DYNC1I2:cytoplasmic dynein 1 intermediate chain 2 isoform 1 [Homo sapiens] ;gi|422398887|ref|NP_001258716.1|:DYNC1I2:cytoplasmic dynein 1 intermediate chain 2 isoform 2 [Homo sapiens] ;gi|422398896|ref|NP_001258717.1|:DYNC1I2:cytoplasmic dynein 1 intermediate chain 2 isoform 3 [Homo sapiens] ;gi|53…	11.0583	0.000108945	0.00051314	0.00067121	0.00039766	0.00051774	0.000524938	8	14	7	5	8.5	0	0	4.747e-05	0	4.747e-05	0	0	1	0	0.25
DCTN1	1 genes:DCTN1.gi|205277392|ref|NP_001128512.1|:DCTN1:dynactin subunit 1 isoform 3 [Homo sapiens] ;gi|299890871|ref|NP_001177765.1|:DCTN1:dynactin subunit 1 isoform 5 [Homo sapiens] ;	10.7592	4.22884e-06	0.00166566	0.00163558	0.00176448	0.00205623	0.00178049	51	67	61	39	54.5	6.669e-05	0.00024607	0.00016919	0.00017999	0.000165485	4	9	7	6	6.5
DYNC1H1	cytoplasmic dynein 1 heavy chain 1 [Homo sapiens]	9.98219	1.03953e-07	0.00402535	0.00380538	0.00379135	0.00422315	0.00396131	457	578	486	297	454.5	0.00020235	0.0004498	0.00044978	0.00048542	0.000396838	45	61	69	60	58.75
HYOU1	1 genes:HYOU1.gi|195976805|ref|NP_001124463.1|:HYOU1:hypoxia up-regulated protein 1 precursor [Homo sapiens] ;gi|530397769|ref|XP_005271451.1|:HYOU1:PREDICTED: hypoxia up-regulated protein 1 isoform X6 [Homo sapiens] ;	9.95534	0.000535359	0.0004506	0.00055113	0.00039908	0.00026452	0.000416333	11	18	11	4	11	4.182e-05	0	0	0	4.182e-05	2	0	0	0	0.5
AKTIP	PREDICTED: AKT-interacting protein isoform X5 [Homo sapiens]	9.74868	0.00321608	0.00460907	0.004489	0.0032162	0.00766603	0.00499507	33	43	26	34	34	0.00064171	0.00058461	0.00031008	0.00051314	0.000512385	9	5	3	4	5.25
HOOK1	PREDICTED: protein Hook homolog 1 isoform X1 [Homo sapiens]	9.21741	9.03775e-05	0.00333502	0.00346647	0.00465881	0.00480954	0.00406746	59.3285	82.5031	93.5771	53	72.1022	0.00045915	0.00061175	0.0003328	0.00036142	0.00044128	16	13	8	7	11
ACOT9	1 genes:ACOT9. 1 proteins in this group did not match any genes. gi|530421012|ref|XP_005274527.1|:PREDICTED: acyl-coenzyme A thioesterase 9, mitochondrial isoform X1 [Homo sapiens] ;gi|530421016|ref|XP_005274529.1|:ACOT9:PREDICTED: acyl-coenzyme A thioesterase 9, mitochondrial isoform X3 [Homo sapiens] ;gi|81295404|ref|NP_001028755.2|:ACOT9:acyl-coenzyme A thioesterase 9, mitochondrial isoform b …	8.14091	0.0211144	0.00099812	0.00054258	0.00064291	0.00014648	0.000582522	11	8	8	1	7	0	7.596e-05	6.715e-05	0	7.1555e-05	0	1	1	0	0.5
KRT19	keratin, type I cytoskeletal 19 [Homo sapiens]	7.90178	0.00630846	0.0014323	0.00220555	0.00377078	0.00339753	0.00270154	14	28.8421	41.6154	20.5714	26.2572	0.00014798	0.00012847	0.00015142	0.00093969	0.00034189	2.83333	1.5	2	10	4.08333
ACTG1	actin, cytoplasmic 2 [Homo sapiens]	7.58524	0.000464706	0.00927587	0.00558425	0.00702081	0.00571568	0.00689915	85	68.4615	72.641	32.4444	64.6368	0.00068566	0.00109626	0.00125488	0.0006014	0.00090955	12.3077	12	15.5385	6	11.4615
ACACA	acetyl-CoA carboxylase 1 isoform 1 [Homo sapiens]	6.82146	0.00483105	0.00581302	0.0117662	0.00599251	0.00619602	0.00744194	338.5	916.667	394	223.5	468.167	0.00053916	0.00156699	0.00129947	0.00095822	0.00109096	61.5	109	102.25	60.75	83.375
ACACB	PREDICTED: acetyl-CoA carboxylase 2 isoform X7 [Homo sapiens]	6.46529	0.00735918	0.00142396	0.00281112	0.00285968	0.00427536	0.00284253	78.5	207.333	178	146	152.458	0.0001389	0.00089594	0.00045306	0.00027074	0.00043966	15	59	33.75	16.25	31
IARS2	isoleucine--tRNA ligase, mitochondrial precursor [Homo sapiens]	6.44519	0.00474439	0.00040438	0.0003627	0.00035814	0.00013056	0.000313945	10	12	10	2	8.5	4.129e-05	6.77e-05	0	3.714e-05	4.871e-05	2	2	0	1	1.25
MTHFD1L	1 genes:MTHFD1L.gi|337756501|ref|NP_001229696.1|:MTHFD1L:monofunctional C1-tetrahydrofolate synthase, mitochondrial isoform 1 precursor [Homo sapiens] ;gi|337756507|ref|NP_001229697.1|:MTHFD1L:monofunctional C1-tetrahydrofolate synthase, mitochondrial isoform 3 [Homo sapiens] ;gi|36796743|ref|NP_056255.2|:MTHFD1L:monofunctional C1-tetrahydrofolate synthase, mitochondrial isoform 2 precursor [Homo…	5.97203	0.0141016	8.36e-05	0.00018746	0.00022213	0.0003374	0.000207647	2	6	6	5	4.75	0	3.499e-05	3.093e-05	3.839e-05	3.477e-05	0	1	1	1	0.75
ZNF326	DBIRD complex subunit ZNF326 isoform 1 [Homo sapiens]	5.75316	2.18707e-05	0.00077346	0.0008409	0.00087185	0.00090808	0.000848572	11	16	14	8	12.25	0	0.00011773	0.00026018	6.458e-05	0.000147497	0	2	5	1	2
DYNC1LI2	cytoplasmic dynein 1 light intermediate chain 2 isoform 1 [Homo sapiens]	5.42677	4.45977e-05	0.00228109	0.00256241	0.0030283	0.00255122	0.00260575	27.4247	41.2159	41.1081	19	32.1872	0.00071713	0.00041778	0	0.00030559	0.000480167	16.8889	6	0	4	6.72222
RAD50	DNA repair protein RAD50 [Homo sapiens]	4.53499	0.000383766	0.0007174	0.0006761	0.0009945	0.00090635	0.000823587	23	29	36	18	26.5	7.962e-05	0.00031334	0.00016158	0.00017189	0.000181608	5	12	7	6	7.5
MCCC1	methylcrotonoyl-CoA carboxylase subunit alpha, mitochondrial precursor [Homo sapiens]	4.48227	5.6199e-05	0.0453822	0.0569145	0.0506917	0.0396379	0.0481566	804	1349	1014	435	900.5	0.010777	0.0119549	0.0106519	0.00959132	0.0107438	374	253	255	185	266.75
GFPT1	1 genes:GFPT1.gi|205277386|ref|NP_002047.2|:GFPT1:glutamine--fructose-6-phosphate aminotransferase [isomerizing] 1 isoform 2 [Homo sapiens] ;gi|347659028|ref|NP_001231639.1|:GFPT1:glutamine--fructose-6-phosphate aminotransferase [isomerizing] 1 isoform 1 [Homo sapiens] ;	4.41757	0.0215697	0.00108166	0.00130257	0.00127732	0.00029103	0.000988145	18	29	24	3	18.5	0.00021474	0.00040245	0.00022236	5.519e-05	0.000223685	7	8	5	1	5.25
PCCB	propionyl-CoA carboxylase beta chain, mitochondrial isoform 1 precursor [Homo sapiens]	4.35049	0.0223518	0.0194365	0.0214512	0.0141883	0.0413048	0.0240952	256	378	211	337	295.5	0.0018992	0.00788129	0.00623677	0.00613675	0.0055385	49	124	111	88	93
AASS	alpha-aminoadipic semialdehyde synthase, mitochondrial [Homo sapiens]	4.29642	0.0279205	0.00026516	3.303e-05	0.00015656	0.00021403	0.000167195	6	1	4	3	3.5	4.512e-05	0	3.271e-05	0	3.8915e-05	2	0	1	0	0.75
MTPAP	poly(A) RNA polymerase, mitochondrial precursor [Homo sapiens]	4.17346	0.00100757	0.00063283	0.00068323	0.00037365	0.00056755	0.000564315	9	13	6	5	8.25	0.00014358	0.00017659	0.00015611	6.458e-05	0.000135215	4	3	3	1	2.75
TUBB2B	tubulin beta-2B chain [Homo sapiens]	4.13472	0.000733785	0.00159106	0.00151853	0.00188615	0.00221232	0.00180202	17.3013	22.0919	23.158	14.9022	19.3633	0.00086678	0.00038492	0.0002382	0.0002534	0.000435825	18.4632	5	3.5	3	7.49081
HLCS	1 genes:HLCS. 2 proteins in this group did not match any genes. gi|530418853|ref|XP_005261010.1|:HLCS:PREDICTED: biotin--protein ligase isoform X1 [Homo sapiens] ;gi|578836517|ref|XP_006724056.1|:PREDICTED: biotin--protein ligase isoform X5 [Homo sapiens] ;gi|578836525|ref|XP_006724059.1|:PREDICTED: biotin--protein ligase isoform X8 [Homo sapiens] ;	4.09824	0.000516651	0.00037501	0.00049053	0.00037365	0.00052972	0.000442227	8	14	9	7	9.5	7.179e-05	7.848e-05	0.00017345	0	0.000107907	3	2	5	0	2.5
YWHAQ	14-3-3 protein theta [Homo sapiens]	3.95012	0.000640082	0.00100219	0.00174788	0.00147935	0.00134823	0.00139441	6	14	10	5	8.75	0.00042635	0.00027966	0	0	0.000353005	5	2	0	0	1.75
MCM5	1 genes:MCM5.gi|23510448|ref|NP_006730.2|:MCM5:DNA replication licensing factor MCM5 [Homo sapiens] ;gi|578837205|ref|XP_006724305.1|:MCM5:PREDICTED: DNA replication licensing factor MCM5 isoform X1 [Homo sapiens] ;	3.689	0.00330782	0.00078055	0.00050007	0.00049379	0.00045002	0.000556108	14	12	10	5	10.25	0.0002277	4.667e-05	0.00012378	0.00020484	0.000150747	8	1	3	4	4
DLD	dihydrolipoyl dehydrogenase, mitochondrial precursor [Homo sapiens]	3.64196	0.00182085	0.00080399	0.00162254	0.00142413	0.0012979	0.00128714	10	27	20	10	16.75	0.00041044	0.00033652	0.00029749	0.00036923	0.00035342	10	5	5	5	6.25
MYL6	myosin light polypeptide 6 isoform 2 [Homo sapiens]	3.62897	0.000483469	0.0021681	0.00243082	0.00192021	0.00196877	0.00212197	8	12	8	4.5	8.125	0.00034588	0.00113438	0.00056826	0.00029041	0.000584732	2.5	5	2.83333	1.16667	2.875
ABCB7	1 genes:ABCB7.gi|411147363|ref|NP_001258625.1|:ABCB7:ATP-binding cassette sub-family B member 7, mitochondrial isoform 2 [Homo sapiens] ;gi|411147365|ref|NP_001258626.1|:ABCB7:ATP-binding cassette sub-family B member 7, mitochondrial isoform 3 [Homo sapiens] ;gi|411147367|ref|NP_001258627.1|:ABCB7:ATP-binding cassette sub-family B member 7, mitochondrial isoform 4 [Homo sapiens] ;gi|411147369|ref…	3.58321	0.0116097	0.00038093	0.00020338	0.00019279	0.0001757	0.0002382	7	5	4	2	4.5	2.778e-05	9.111e-05	8.054e-05	0	6.64767e-05	1	2	2	0	1.25
PC	PREDICTED: pyruvate carboxylase, mitochondrial isoform X5 [Homo sapiens]	3.58012	7.22668e-07	0.0457517	0.0456481	0.0501817	0.0491267	0.0476771	1317	1758	1631	876	1395.5	0.0164576	0.0132321	0.012443	0.0111359	0.0133172	928	455	484	349	554
PCNA	proliferating cell nuclear antigen [Homo sapiens]	3.47411	0.00218526	0.00486058	0.00281268	0.00319392	0.0032905	0.00353942	31	24	23	13	22.75	0.00152081	0.00105006	0.00092827	0.00057606	0.0010188	19	8	8	4	9.75
CP	ceruloplasmin precursor [Homo sapiens]	3.41709	0.035907	3.843e-05	0.0001436	0.00017016	6.203e-05	0.000103555	1	5	5	1	3	0	3.217e-05	2.844e-05	0	3.0305e-05	0	1	1	0	0.5
PCCA	propionyl-CoA carboxylase alpha chain, mitochondrial isoform a precursor [Homo sapiens]	3.3935	0.000589433	0.0170887	0.015462	0.0135915	0.0207808	0.0167308	304	368	273	229	293.5	0.00218095	0.00550578	0.00640642	0.00562782	0.00493024	76	117	154	109	114
PATL1	1 genes:PATL1.gi|189217919|ref|NP_689929.2|:PATL1:protein PAT1 homolog 1 [Homo sapiens] ;gi|530396446|ref|XP_005273890.1|:PATL1:PREDICTED: protein PAT1 homolog 1 isoform X1 [Homo sapiens] ;gi|530396448|ref|XP_005273891.1|:PATL1:PREDICTED: protein PAT1 homolog 1 isoform X2 [Homo sapiens] ;	3.29829	0.0356632	0.00015944	0.00023835	4.707e-05	0.00017159	0.000154112	3	6	1	2	3	5.426e-05	4.449e-05	3.933e-05	4.882e-05	4.6725e-05	2	1	1	1	1.25
HNRNPH1	heterogeneous nuclear ribonucleoprotein H [Homo sapiens]	3.25121	0.000609796	0.00166892	0.00232596	0.0018841	0.00259182	0.0021177	18.3111	34.1429	23.3407	17.6154	23.3525	0.00062779	0.00050357	0.00088134	0.00059273	0.000651358	13.4928	6.6	13.0667	7.08042	10.06
KRI1	protein KRI1 homolog [Homo sapiens]	3.13812	0.0177514	0.00063491	0.0011217	0.00138024	0.00186356	0.0012501	11	26	27	20	21	0.00032412	0.00028991	0.00055529	0.00042412	0.00039836	11	6	13	8	9.5
SNX2	1 genes:SNX2.gi|23111038|ref|NP_003091.2|:SNX2:sorting nexin-2 isoform 1 [Homo sapiens] ;gi|503774159|ref|NP_001265128.1|:SNX2:sorting nexin-2 isoform 2 [Homo sapiens] ;	3.09534	0.00858914	0.00023655	0.00029468	0.00048884	0.00038187	0.000350485	3	5	7	3	4.5	0.00020126	6.601e-05	0	7.242e-05	0.00011323	5	1	0	1	1.75
RBM14	RNA-binding protein 14 isoform 1 [Homo sapiens]	3.07414	0.0119307	0.00079521	0.00114304	0.00146276	0.00078999	0.00104775	13	25	27	8	18.25	0.00021859	0.00015362	0.00031688	0.00067422	0.000340827	7	3	7	12	7.25

## Sheet: NT NIN
				BioID-NIN										BioID control
				distributed normalized spectral abundance factor (dNSAF)					distributed Spectral Counts					distributed normalized spectral abundance factor (dNSAF)					distributed Spectral Counts
NCBI_Gene	Description	enrichment ratio	p-value	dNSAF 1	dNSAF 2	dNSAF 3	dNSAF 4	avg dNSAF	dSC 1	dSC 2	dSC 3	dSC 4	avg dSCs	dNSAF 1	dNSAF 2	dNSAF 3	dNSAF 4	avg dNSAF	dSC 1	dSC 2	dSC 3	dSC 4	avg dSCs
APRT	adenine phosphoribosyltransferase isoform a [Homo sapiens]	∞	0.0472054	0.0004782	0.00043538	0.00088221	0	0.000598597	3	2	3	0	2	0	0	0	0	0	0	0	0	0	0
DSG2	desmoglein-2 preproprotein [Homo sapiens]	∞	0.0207928	0.00023097	7.01e-05	0.00014204	5.602e-05	0.000124782	9	2	3	2	4	0	0	0	0	0	0	0	0	0	0
EIF6	1 genes:EIF6.gi|31563374|ref|NP_852131.1|:EIF6:eukaryotic translation initiation factor 6 isoform c [Homo sapiens] ;gi|392494084|ref|NP_001254739.1|:EIF6:eukaryotic translation initiation factor 6 isoform a [Homo sapiens] ;	∞	0.0417896	0.00025391	0	0.00046843	0.00055427	0.000425537	2	0	2	4	2	0	0	0	0	0	0	0	0	0	0
ERC1	ELKS/Rab6-interacting/CAST family member 1 isoform epsilon [Homo sapiens]	∞	0.00502171	0.0002571	0.00035112	0.00028458	0.00064541	0.000384552	10	10	6	23	12.25	0	0	0	0	0	0	0	0	0	0
ERLIN1	PREDICTED: erlin-1 isoform X1 [Homo sapiens]	∞	0.00355341	8.73e-05	0.00027524	0.00030421	0.00022498	0.000222933	1.05882	2.44444	2	2.5	2.00082	0	0	0	0	0	0	0	0	0	0
FLOT2	1 genes:FLOT2. 1 proteins in this group did not match any genes. gi|530410971|ref|XP_005258007.1|:FLOT2:PREDICTED: flotillin-2 isoform X1 [Homo sapiens] ;gi|530410975|ref|XP_005258009.1|:PREDICTED: flotillin-2 isoform X3 [Homo sapiens] ;gi|530410977|ref|XP_005258010.1|:FLOT2:PREDICTED: flotillin-2 isoform X4 [Homo sapiens] ;gi|94538362|ref|NP_004466.2|:FLOT2:flotillin-2 [Homo sapiens] ;	∞	0.0254569	0.00013407	9.155e-05	0.00037102	0.00014634	0.000185745	2	1	3	2	2	0	0	0	0	0	0	0	0	0	0
GANAB	1 genes:GANAB.gi|38202257|ref|NP_938148.1|:GANAB:neutral alpha-glucosidase AB isoform 2 precursor [Homo sapiens] ;gi|499589572|ref|NP_001265121.1|:GANAB:neutral alpha-glucosidase AB isoform 4 [Homo sapiens] ;gi|499589599|ref|NP_001265122.1|:GANAB:neutral alpha-glucosidase AB isoform 5 [Homo sapiens] ;gi|499589768|ref|NP_001265123.1|:GANAB:neutral alpha-glucosidase AB isoform 6 [Homo sapiens] ;gi|…	∞	0.00505119	0.00012158	0.00020754	0.00011214	6.635e-05	0.000126903	4	5	2	2	3.25	0	0	0	0	0	0	0	0	0	0
GCAT	1 genes:GCAT. 1 proteins in this group did not match any genes. gi|530419682|ref|XP_005261467.1|:GCAT:PREDICTED: 2-amino-3-ketobutyrate coenzyme A ligase, mitochondrial isoform X2 [Homo sapiens] ;gi|530419684|ref|XP_005261468.1|:GCAT:PREDICTED: 2-amino-3-ketobutyrate coenzyme A ligase, mitochondrial isoform X3 [Homo sapiens] ;gi|578837022|ref|XP_006724235.1|:PREDICTED: 2-amino-3-ketobutyrate coen…	∞	0.00202319	0.00019343	8.805e-05	0.00011895	0.00021112	0.000152887	3	1	1	3	2	0	0	0	0	0	0	0	0	0	0
GNAI3	guanine nucleotide-binding protein G(k) subunit alpha [Homo sapiens]	∞	0.00013182	0.00038904	0.00022138	0.00029905	0.00035386	0.000315833	4.8	2	2	4	3.2	0	0	0	0	0	0	0	0	0	0
GSK3A	glycogen synthase kinase-3 alpha [Homo sapiens]	∞	0.0485991	0.00035642	0.00048676	0	0.00019451	0.000345897	6	6	0	3	3.75	0	0	0	0	0	0	0	0	0	0
HUS1	checkpoint protein HUS1 [Homo sapiens]	∞	0.000428298	0.00020494	0.00027989	0.00037809	0.00022369	0.000271653	2	2	2	2	2	0	0	0	0	0	0	0	0	0	0
LIPA	1 genes:LIPA.gi|189083851|ref|NP_001121077.1|:LIPA:lysosomal acid lipase/cholesteryl ester hydrolase isoform 1 precursor [Homo sapiens] ;gi|572876118|ref|NP_001275908.1|:LIPA:lysosomal acid lipase/cholesteryl ester hydrolase isoform 2 [Homo sapiens] ;	∞	4.53643e-06	0.00021573	0.00019641	0.00026532	0.00023546	0.00022823	3	2	2	3	2.5	0	0	0	0	0	0	0	0	0	0
MCU	1 genes:MCU.gi|24308400|ref|NP_612366.1|:MCU:calcium uniporter protein, mitochondrial isoform 1 precursor [Homo sapiens] ;gi|398303805|ref|NP_001257609.1|:MCU:calcium uniporter protein, mitochondrial isoform 3 [Homo sapiens] ;	∞	0.0103875	0.00049046	0.00033491	0.0001508	0.00017844	0.000288652	6	3	1	2	3	0	0	0	0	0	0	0	0	0	0
MEN1	1 genes:MEN1. 1 proteins in this group did not match any genes. gi|18860847|ref|NP_570711.1|:MEN1:menin isoform 2 [Homo sapiens] ;gi|18860857|ref|NP_570716.1|:MEN1:menin isoform 1 [Homo sapiens] ;gi|578821429|ref|XP_006718620.1|:PREDICTED: menin isoform X4 [Homo sapiens] ;	∞	0.0264782	4.704e-05	0.00012847	0.0003471	0.00025669	0.000194825	1	2	4	5	3	0	0	0	0	0	0	0	0	0	0
MIA3	1 genes:MIA3. 1 proteins in this group did not match any genes. gi|122891870|ref|NP_940953.2|:MIA3:melanoma inhibitory activity protein 3 precursor [Homo sapiens] ;gi|530366181|ref|XP_005273178.1|:PREDICTED: melanoma inhibitory activity protein 3 isoform X1 [Homo sapiens] ;	∞	0.0255639	0	6.164e-05	5.551e-05	4.927e-05	5.54733e-05	0	3	2	3	2	0	0	0	0	0	0	0	0	0	0
MRPL41	39S ribosomal protein L41, mitochondrial [Homo sapiens]	∞	0.00119556	0.00083772	0.00085805	0.0011591	0.00045718	0.000828012	4	3	3	2	3	0	0	0	0	0	0	0	0	0	0
MSTO1	1 genes:MSTO1. 9 proteins in this group did not match any genes. gi|374717330|ref|NP_001243461.1|:MSTO1:protein misato homolog 1 isoform b [Homo sapiens] ;gi|374717332|ref|NP_001243462.1|:MSTO1:protein misato homolog 1 isoform c [Homo sapiens] ;gi|39780571|ref|NP_060586.2|:MSTO1:protein misato homolog 1 isoform a [Homo sapiens] ;gi|578801179|ref|XP_006711475.1|:PREDICTED: protein misato homolog 1…	∞	0.0392685	0.00010085	0.0002066	0	0.00016511	0.00015752	2	3	0	3	2	0	0	0	0	0	0	0	0	0	0
NIN	ninein isoform 2 [Homo sapiens]	∞	1.89699e-06	0.00644324	0.00600718	0.00493836	0.00560849	0.00574932	479	327	199	382	346.75	0	0	0	0	0	0	0	0	0	0
PCID2	1 genes:PCID2. 2 proteins in this group did not match any genes. gi|224451003|ref|NP_001120675.1|:PCID2:PCI domain-containing protein 2 isoform 1 [Homo sapiens] ;gi|384871581|ref|NP_001245141.1|:PCI domain-containing protein 2 isoform 2 [Homo sapiens] ;gi|530426984|ref|XP_005268381.1|:PREDICTED: PCI domain-containing protein 2 isoform X3 [Homo sapiens] ;	∞	0.00408183	0.00028764	0.00029462	0.00026532	7.849e-05	0.000231517	4	3	2	1	2.5	0	0	0	0	0	0	0	0	0	0
PKP4	1 genes:PKP4.gi|53829374|ref|NP_003619.2|:PKP4:plakophilin-4 isoform a [Homo sapiens] ;gi|53829376|ref|NP_001005476.1|:PKP4:plakophilin-4 isoform b [Homo sapiens] ;	∞	0.00833029	7.221e-05	6.575e-05	0.00017763	0.00018391	0.000124875	3	2	4	7	4	0	0	0	0	0	0	0	0	0	0
PRIM1	DNA primase small subunit [Homo sapiens]	∞	0.00129915	0.00013663	0.00027989	0.00025206	0.00014913	0.000204428	2	3	2	2	2.25	0	0	0	0	0	0	0	0	0	0
PUS1	1 genes:PUS1.gi|70166634|ref|NP_001002020.1|:PUS1:tRNA pseudouridine synthase A, mitochondrial isoform 2 [Homo sapiens] ;gi|70166645|ref|NP_079491.2|:PUS1:tRNA pseudouridine synthase A, mitochondrial isoform 1 [Homo sapiens] ;	∞	0.00684672	7.191e-05	0.00019641	0.00026532	0.00031395	0.000211897	1	2	2	4	2.25	0	0	0	0	0	0	0	0	0	0
RAB3B	ras-related protein Rab-3B [Homo sapiens]	∞	0.0247119	0.00013101	0.00035785	0.0007251	0.000286	0.00037499	1	2	3	2	2	0	0	0	0	0	0	0	0	0	0
RFC5	1 genes:RFC5.gi|194306567|ref|NP_853556.2|:RFC5:replication factor C subunit 5 isoform 2 [Homo sapiens] ;gi|332164786|ref|NP_001193730.1|:RFC5:replication factor C subunit 5 isoform 4 [Homo sapiens] ;gi|6677723|ref|NP_031396.1|:RFC5:replication factor C subunit 5 isoform 1 [Homo sapiens] ;	∞	0.000711714	0.00071955	0.00073701	0.00033186	0.00058903	0.000594363	8	6	2	6	5.5	0	0	0	0	0	0	0	0	0	0
RPL35	60S ribosomal protein L35 [Homo sapiens]	∞	0.0250286	0.0006998	0.00063715	0	0.00076382	0.000700257	3	2	0	3	2	0	0	0	0	0	0	0	0	0	0
SENP1	1 genes:SENP1.gi|390131988|ref|NP_001254523.1|:SENP1:sentrin-specific protease 1 [Homo sapiens] ;gi|578823628|ref|XP_006719424.1|:SENP1:PREDICTED: sentrin-specific protease 1 isoform X1 [Homo sapiens] ;	∞	0.0449513	0	0.00036507	0.00016439	0.00024314	0.000257533	0	6	2	5	3.25	0	0	0	0	0	0	0	0	0	0
SLC25A15	mitochondrial ornithine transporter 1 [Homo sapiens]	∞	0.0255085	0.00028597	0.00039054	0.00070342	0.00010404	0.000370992	3	3	4	1	2.75	0	0	0	0	0	0	0	0	0	0
STXBP3	syntaxin-binding protein 3 [Homo sapiens]	∞	0.0261805	0.00033926	0.00033095	0	0.0002645	0.00031157	7	5	0	5	4.25	0	0	0	0	0	0	0	0	0	0
TIMM44	mitochondrial import inner membrane translocase subunit TIM44 [Homo sapiens]	∞	0.0354472	0.00019043	0	0.00035132	0.00027714	0.000272963	3	0	3	4	2.5	0	0	0	0	0	0	0	0	0	0
TMEM165	transmembrane protein 165 precursor [Homo sapiens]	∞	0.0456509	0.00017711	0.00036282	0.00098023	0.00028997	0.000452533	2	3	6	3	3.5	0	0	0	0	0	0	0	0	0	0
TUBA1C	tubulin alpha-1C chain [Homo sapiens]	8.42073	0.00100796	0.00828535	0.00665427	0.012074	0.0072189	0.00855813	129.657	76.2488	102.418	103.501	102.956	0.00082252	0.00109866	0.00024249	0.0019016	0.00101632	10.95	10.75	1.33333	22.1428	11.294
ATP6V1H	1 genes:ATP6V1H.gi|47717104|ref|NP_057025.2|:ATP6V1H:V-type proton ATPase subunit H isoform 1 [Homo sapiens] ;gi|578815670|ref|XP_006716518.1|:ATP6V1H:PREDICTED: V-type proton ATPase subunit H isoform X1 [Homo sapiens] ;	7.33749	0.0346495	0	0.00040564	0.00054795	0.00058354	0.000512377	0	5	5	9	4.75	6.983e-05	0	0	0	6.983e-05	1	0	0	0	0.25
ANXA2	1 genes:ANXA2.gi|209862831|ref|NP_001129487.1|:ANXA2:annexin A2 isoform 2 [Homo sapiens] ;gi|50845388|ref|NP_001002858.1|:ANXA2:annexin A2 isoform 1 [Homo sapiens] ;	6.60981	0.000509739	0.00076173	0.00104029	0.00093685	0.00055427	0.000823285	9	9	6	6	7.5	0	0.00013536	0	0.00011375	0.000124555	0	1	0	1	0.5
IQGAP1	ras GTPase-activating-like protein IQGAP1 [Homo sapiens]	6.16852	2.20137e-05	0.000329	0.00026013	0.00031945	0.00026459	0.000293292	19	11	10	14	13.5	4.071e-05	5.539e-05	0	4.654e-05	4.75467e-05	2	2	0	2	1.5
DCTN1	1 genes:DCTN1.gi|205277392|ref|NP_001128512.1|:DCTN1:dynactin subunit 1 isoform 3 [Homo sapiens] ;gi|299890871|ref|NP_001177765.1|:DCTN1:dynactin subunit 1 isoform 5 [Homo sapiens] ;	6.08061	5.06073e-05	0.00075565	0.00096945	0.0007604	0.00092475	0.000852563	33	31	18	37	29.75	0.00013459	7.325e-05	0.00026068	9.232e-05	0.00014021	5	2	4	3	3.5
ESYT2	extended synaptotagmin-2 [Homo sapiens]	5.85805	0.0173446	0.0006426	0.00017552	0.00035565	0.00028055	0.00036358	20	4	6	8	9.5	3.777e-05	0	0	8.636e-05	6.2065e-05	1	0	0	2	0.75
ATP1A1	sodium/potassium-transporting ATPase subunit alpha-1 isoform a [Homo sapiens]	5.77936	0.0119244	0.00030852	0.00019152	0.00020697	0.00052041	0.000306855	11	5	4	17	9.25	1.648e-05	8.971e-05	0	0	5.3095e-05	0.5	2	0	0	0.625
NUP93	PREDICTED: nuclear pore complex protein Nup93 isoform X1 [Homo sapiens]	5.59903	0.00207036	0.00077072	0.00047844	0.00103409	0.00076475	0.000762	22	10	16	20	17	4.118e-05	0.00016809	9.97e-05	0.00023541	0.000136095	1	3	1	5	2.5
DYNC1LI2	cytoplasmic dynein 1 light intermediate chain 2 isoform 1 [Homo sapiens]	5.15406	0.00561243	0.00042863	0.00071679	0.00118345	0.00070017	0.00075726	7.35	9	11	11	9.5875	0.0001371	0	0	0.00015675	0.000146925	2	0	0	2	1
NUP205	nuclear pore complex protein Nup205 [Homo sapiens]	4.47641	5.74433e-05	0.00031373	0.00029213	0.00028939	0.00024904	0.000286073	22	15	11	16	16	5.029e-05	4.561e-05	0	9.582e-05	6.39067e-05	3	2	0	5	2.5
SLC25A4	ADP/ATP translocase 1 [Homo sapiens]	4.45554	0.000209467	0.00109186	0.00100289	0.00137815	0.00147248	0.00123635	11.3402	7.627	7.75874	14.0118	10.1844	0.00028095	0	0.00027402	0	0.000277485	2.48235	0	1	0	0.870588
CEP55	centrosomal protein of 55 kDa [Homo sapiens]	4.43986	2.86219e-05	0.00092754	0.00109784	0.00125486	0.00114737	0.0011069	15	13	11	17	14	0	0	0	0.00024931	0.00024931	0	0	0	3	0.75
WDR3	WD repeat-containing protein 3 [Homo sapiens]	4.28066	0.0319121	0.00024341	0.00054019	0.00028066	0.00013284	0.000299275	8	13	5	4	7.5	7.153e-05	9.732e-05	0	4.089e-05	6.99133e-05	2	2	0	1	1.25
MYO1D	unconventional myosin-Id [Homo sapiens]	4.23794	0.00402459	0.00034225	0.00027266	0.00015785	0.00037356	0.00028658	12	7	3	12	8.5	6.705e-05	4.561e-05	8.117e-05	7.666e-05	6.76225e-05	2	1	1	2	1.5
DNAJB6	dnaJ homolog subfamily B member 6 isoform a [Homo sapiens]	4.19807	0.00400513	0.00211229	0.00168277	0.00227317	0.00096063	0.00175722	24	14	14	10	15.5	0.00041383	0	0.00025049	0.00059141	0.000418577	4	0	1	5	2.5
LMNB1	lamin-B1 isoform 1 [Homo sapiens]	4.19502	0.000205747	0.00083236	0.00066868	0.00090328	0.00101538	0.000854925	17	10	10	19	14	0.00017267	0.00023492	0	0	0.000203795	3	3	0	0	1.5
DYNC1H1	cytoplasmic dynein 1 heavy chain 1 [Homo sapiens]	4.14017	0.000161475	0.00091399	0.00119763	0.00112792	0.00117959	0.00110478	148	142	99	175	141	0.00023956	0.00032594	7.03e-05	0.00043158	0.000266845	33	33	4	52	30.5
PLOD1	procollagen-lysine,2-oxoglutarate 5-dioxygenase 1 precursor [Homo sapiens]	4.03092	0.0259997	0.00043413	0.00037729	0.00116495	0.0007323	0.000677167	11	7	16	17	12.75	0.00013918	0.00025248	0.00011232	0	0.000167993	3	4	1	0	2
AGRN	1 genes:AGRN. 1 proteins in this group did not match any genes. gi|54873613|ref|NP_940978.2|:AGRN:agrin precursor [Homo sapiens] ;gi|578799094|ref|XP_006710697.1|:PREDICTED: agrin isoform X4 [Homo sapiens] ;	4.02591	0.0245074	7.015e-05	5.748e-05	5.177e-05	0.00015314	8.3135e-05	5	3	2	10	5	0	2.244e-05	0	1.886e-05	2.065e-05	0	1	0	1	0.5
RPL7	60S ribosomal protein L7 [Homo sapiens]	3.9814	0.00425636	0.00080985	0.00079001	0.00128062	0.00063138	0.000877965	7	5	6	5	5.75	0.000136	0.00037007	0	0.00015548	0.000220517	1	2	0	1	1
KRT5	keratin, type II cytoskeletal 5 [Homo sapiens]	3.97202	0.0275466	0.00066694	0.00051803	0.00048703	0.00125399	0.000731497	13.7145	7.8	5.42857	23.625	12.642	5.986e-05	0.00010889	0.00023067	0.00033723	0.000184163	1.04722	1.4	1.66667	5.16	2.31847
NOMO2	3 genes:NOMO1,NOMO2,NOMO3. 1 proteins in this group did not match any genes. gi|27734709|ref|NP_775885.1|:NOMO2:nodal modulator 2 isoform 2 precursor [Homo sapiens] ;gi|51944953|ref|NP_055102.3|:NOMO1:nodal modulator 1 precursor [Homo sapiens] ;gi|51944969|ref|NP_001004067.1|:NOMO3:nodal modulator 3 precursor [Homo sapiens] ;gi|51944971|ref|NP_001004060.1|:NOMO2:nodal modulator 2 isoform 1 precur…	3.91837	7.46428e-05	0.00023479	0.00025653	0.0002599	0.00020502	0.00023906	10	8	6	8	8	5.52e-05	0	6.682e-05	0	6.101e-05	2	0	1	0	0.75
GFPT1	1 genes:GFPT1.gi|205277386|ref|NP_002047.2|:GFPT1:glutamine--fructose-6-phosphate aminotransferase [isomerizing] 1 isoform 2 [Homo sapiens] ;gi|347659028|ref|NP_001231639.1|:GFPT1:glutamine--fructose-6-phosphate aminotransferase [isomerizing] 1 isoform 1 [Homo sapiens] ;	3.83191	0.000356852	0.00063198	0.00051786	0.00054409	0.00045986	0.000538448	15	9	7	10	10.25	4.953e-05	0.00020215	0	0.00016987	0.000140517	1	3	0	3	1.75
ARHGEF2	1 genes:ARHGEF2.gi|253735775|ref|NP_001155855.1|:ARHGEF2:rho guanine nucleotide exchange factor 2 isoform 1 [Homo sapiens] ;gi|530365588|ref|XP_005245644.1|:ARHGEF2:PREDICTED: rho guanine nucleotide exchange factor 2 isoform X1 [Homo sapiens] ;gi|530365592|ref|XP_005245646.1|:ARHGEF2:PREDICTED: rho guanine nucleotide exchange factor 2 isoform X3 [Homo sapiens] ;gi|530365596|ref|XP_005245648.1|:AR…	3.69975	0.0016849	0.00023279	0.00015896	0.00016105	0.00025409	0.000201722	8	4	3	8	5.75	3.421e-05	4.654e-05	8.282e-05	0	5.45233e-05	1	1	1	0	0.75
PRDX4	peroxiredoxin-4 precursor [Homo sapiens]	3.66672	0.00731158	0.00243511	0.00274725	0.00117193	0.00277342	0.00228193	23	19	6	24	18	0.00099564	0.00033866	0.00030132	0.00085372	0.000622335	8	2	1	6	4.25
ACOT9	1 genes:ACOT9. 1 proteins in this group did not match any genes. gi|530421012|ref|XP_005274527.1|:PREDICTED: acyl-coenzyme A thioesterase 9, mitochondrial isoform X1 [Homo sapiens] ;gi|530421016|ref|XP_005274529.1|:ACOT9:PREDICTED: acyl-coenzyme A thioesterase 9, mitochondrial isoform X3 [Homo sapiens] ;gi|81295404|ref|NP_001028755.2|:ACOT9:acyl-coenzyme A thioesterase 9, mitochondrial isoform b …	3.66345	0.0134396	0.00089066	0.00026065	0.0007042	0.00062494	0.000620112	14	3	6	9	8	0.00014957	0.00010175	0	0.00025649	0.00016927	2	1	0	3	1.5
MCM3	DNA replication licensing factor MCM3 isoform 1 [Homo sapiens]	3.63349	0.0014033	0.00090819	0.00133218	0.00086876	0.0011014	0.00105263	27	29	14	30	25	0.00015816	0.00053796	0.00019146	0.00027123	0.000289703	4	10	2	6	5.5
TAF2	1 genes:TAF2.gi|4507347|ref|NP_003175.1|:TAF2:transcription initiation factor TFIID subunit 2 [Homo sapiens] ;gi|578816122|ref|XP_006716684.1|:TAF2:PREDICTED: transcription initiation factor TFIID subunit 2 isoform X1 [Homo sapiens] ;	3.6321	0.00587326	0.0002393	0.00013072	0.00013244	0.00013059	0.000158262	10	4	3	5	5.5	2.813e-05	3.827e-05	0	6.432e-05	4.35733e-05	1	1	0	2	1
LONP1	1 genes:LONP1.gi|21396489|ref|NP_004784.2|:LONP1:lon protease homolog, mitochondrial isoform 1 precursor [Homo sapiens] ;gi|451327634|ref|NP_001263408.1|:LONP1:lon protease homolog, mitochondrial isoform 2 [Homo sapiens] ;gi|451327636|ref|NP_001263409.1|:LONP1:lon protease homolog, mitochondrial isoform 3 [Homo sapiens] ;	3.52732	0.00391551	0.00026927	0.0002043	0.00011039	0.00019593	0.000194972	9	5	2	6	5.5	7.034e-05	0	0	4.021e-05	5.5275e-05	2	0	0	1	0.75
PFKM	PREDICTED: 6-phosphofructokinase, muscle type isoform X3 [Homo sapiens]	3.48113	0.0240502	0.00045491	0.00031064	0.00034968	0.00076806	0.000470823	14	7	5.83333	21.6562	12.1224	7.639e-05	0.00025984	9.248e-05	0.00011229	0.00013525	2	5	1	2.57143	2.64286
DHX40	1 genes:DHX40.gi|261878478|ref|NP_078888.4|:DHX40:probable ATP-dependent RNA helicase DHX40 isoform 1 [Homo sapiens] ;gi|578831405|ref|XP_006722146.1|:DHX40:PREDICTED: probable ATP-dependent RNA helicase DHX40 isoform X1 [Homo sapiens] ;	3.46963	0.0115372	0.00029465	0.0002515	0.00054359	0.00024121	0.000332738	8	5	8	6	6.75	4.33e-05	0	0	0.0001485	9.59e-05	1	0	0	3	1
FLOT1	0 genes:. 2 proteins in this group did not match any genes. gi|530429490|ref|XP_005275559.1|:PREDICTED: flotillin-1 isoform X1 [Homo sapiens] ;gi|578842266|ref|XP_006726135.1|:PREDICTED: flotillin-1 isoform X3 [Homo sapiens] ;	3.39911	0.000630772	0.00026878	0.00036707	0.00037189	0.00022002	0.00030694	4	4	3	3	3.5	0	0	0	9.03e-05	9.03e-05	0	0	0	1	0.25
MTPAP	poly(A) RNA polymerase, mitochondrial precursor [Homo sapiens]	3.35645	0.0016231	0.00069018	0.00107724	0.00100044	0.00091474	0.00092065	14	16	11	17	14.5	0.00052156	0.00023654	0.00014031	0.00019876	0.000274293	9	3	1	3	4
PPM1F	protein phosphatase 1F [Homo sapiens]	3.33876	0.0101367	0.00044239	0.00034524	0.00058295	0.00082775	0.000549583	7	4	5	12	7	0.00022287	0.00010108	0	0.00016987	0.000164607	3	1	0	2	1.5
RBM14	RNA-binding protein 14 isoform 1 [Homo sapiens]	3.29769	0.0188852	0.00098642	0.00134715	0.00055385	0.00149795	0.00109634	23	23	7	32	21.25	0.00015124	0.00048015	0.00012206	0.00057638	0.000332458	3	7	1	10	5.25
TUBB6	tubulin beta-6 chain [Homo sapiens]	3.29496	0.000398883	0.00307222	0.00370617	0.00334543	0.00358756	0.00342785	47.7559	42.1839	28.1881	51.0929	42.3052	0.00150776	0.00024007	0.00153463	0.00087886	0.00104033	19.9382	2.33333	8.38182	10.1653	10.2047
ARCN1	coatomer subunit delta isoform 1 [Homo sapiens]	3.25033	0.026583	0.00022459	0.0008435	0.00093227	0.00073542	0.000683945	4	11	9	12	9	0.00039601	0	0.0001598	7.546e-05	0.000210423	6	0	1	1	2
DNAJA3	1 genes:DNAJA3.gi|205360838|ref|NP_005138.3|:DNAJA3:dnaJ homolog subfamily A member 3, mitochondrial isoform 1 [Homo sapiens] ;gi|205360840|ref|NP_001128582.1|:DNAJA3:dnaJ homolog subfamily A member 3, mitochondrial isoform 2 [Homo sapiens] ;	3.22668	0.00404214	0.00083685	0.00057144	0.00066165	0.00039146	0.00061535	14	7	6	6	8.25	0.0002108	0.0001912	0.00017012	0	0.000190707	3	2	1	0	1.5
LTBP4	1 genes:LTBP4.gi|110347412|ref|NP_003564.2|:LTBP4:latent-transforming growth factor beta-binding protein 4 isoform b [Homo sapiens] ;gi|110347431|ref|NP_001036009.1|:LTBP4:latent-transforming growth factor beta-binding protein 4 isoform a precursor [Homo sapiens] ;gi|110347437|ref|NP_001036010.1|:LTBP4:latent-transforming growth factor beta-binding protein 4 isoform c precursor [Homo sapiens] ;	3.21071	0.00367376	0.00019887	0.00034567	0.00020012	0.00031573	0.000265098	11	14	6	16	11.75	6.376e-05	8.675e-05	0	9.719e-05	8.25667e-05	3	3	0	4	2.5
TUBB4A	tubulin beta-4A chain isoform 1 [Homo sapiens]	3.19344	0.0180755	0.00121968	0.00108212	0.00296775	0.00182858	0.00177453	21.0423	13.67	27.7531	28.9031	22.8421	0.00037475	0	0	0.00073661	0.00055568	5.5	0	0	9.45604	3.73901
AASS	alpha-aminoadipic semialdehyde synthase, mitochondrial [Homo sapiens]	3.14631	0.0068286	0.00021689	0.00025389	0.00011432	0.00013528	0.000180095	7	6	2	4	4.75	7.284e-05	0	0	4.164e-05	5.724e-05	2	0	0	1	0.75
PCM1	PREDICTED: pericentriolar material 1 protein isoform X26 [Homo sapiens]	3.08426	0.0141685	3.159e-05	5.523e-05	5.246e-05	8.365e-05	5.57325e-05	2.27273	2.90909	2.04545	5.51299	3.18506	1.422e-05	1.819e-05	1.439e-05	2.548e-05	1.807e-05	0.87013	0.818182	0.363636	1.36364	0.853896
XIAP	PREDICTED: E3 ubiquitin-protein ligase XIAP isoform X1 [Homo sapiens]	3.07171	0.0180278	0.00028865	0.00070958	0.00031951	0.0005671	0.00047121	5	9	3	9	6.5	0.00020358	9.233e-05	0.0001643	0	0.000153403	3	1	1	0	1.25
TSFM	elongation factor Ts, mitochondrial isoform 2 precursor [Homo sapiens]	3.07115	0.00967369	0.00070626	0.00048227	0.00048861	0.00096359	0.000660182	8	4	3	10	6.25	0.00020755	0.00028239	0.00025126	0.00011865	0.000214963	2	2	1	1	1.5
ETFA	electron transfer flavoprotein subunit alpha, mitochondrial isoform a [Homo sapiens]	3.06425	0.0083466	0.00086162	0.00047068	0.00047687	0.00094044	0.000687402	10	4	3	10	6.75	0.00010128	0	0	0.00034738	0.00022433	1	0	0	3	1
GTPBP1	GTP-binding protein 1 [Homo sapiens]	3.05926	0.00250696	0.00038599	0.00041	0.00055385	0.00028087	0.000407678	9	7	7	6	7.25	0.00015124	0	0	0.00011528	0.00013326	3	0	0	2	1.25
GCLM	glutamate--cysteine ligase regulatory subunit [Homo sapiens]	3.03404	0.00812379	0.00041886	0.00085805	0.00057955	0.00091435	0.000692702	4	6	3	8	5.25	0.00024618	0	0.00029802	0.00014073	0.00022831	2	0	1	1	1
LUZP1	leucine zipper protein 1 [Homo sapiens]	3.02137	0.0021886	0.00031998	0.0002185	0.00029516	0.00046567	0.000324828	12	6	6	16	10	0	0	0	0.00010751	0.00010751	0	0	0	3	0.75
PCM1	PREDICTED: pericentriolar material 1 protein isoform X21 [Homo sapiens]	3.00532	0.00931814	3.445e-05	5.349e-05	4.194e-05	7.367e-05	5.08875e-05	2.55844	2.90909	1.68831	5.01299	3.04221	1.151e-05	1.762e-05	1.393e-05	2.467e-05	1.69325e-05	0.727273	0.818182	0.363636	1.36364	0.818182
PCM1	PREDICTED: pericentriolar material 1 protein isoform X24 [Homo sapiens]	3.0046	0.00932535	3.536e-05	5.491e-05	4.305e-05	7.562e-05	5.2235e-05	2.55844	2.90909	1.68831	5.01299	3.04221	1.182e-05	1.809e-05	1.43e-05	2.533e-05	1.7385e-05	0.727273	0.818182	0.363636	1.36364	0.818182

## Sheet: NT NINL 
				BioID-NINL										BioID control
				distributed normalized spectral abundance factor (dNSAF)					distributed Spectral Counts					distributed normalized spectral abundance factor (dNSAF)					distributed Spectral Counts
NCBI_Gene	Description	enrichment ratio	p-value	dNSAF 1	dNSAF 2	dNSAF 3	dNSAF 4	avg dNSAF	dSC 1	dSC 2	dSC 3	dSC 4	avg dSCs	dNSAF 1	dNSAF 2	dNSAF 3	dNSAF 4	avg dNSAF	dSC 1	dSC 2	dSC 3	dSC 4	avg dSCs
CAMSAP3	calmodulin-regulated spectrin-associated protein 3 isoform 2 [Homo sapiens]	∞	0.00558335	0.00015225	0.00012838	5.662e-05	6.326e-05	0.000100127	4	3	1	1	2.25	0	0	0	0	0	0	0	0	0	0
CCDC14	1 genes:CCDC14.gi|530375143|ref|XP_005247767.1|:CCDC14:PREDICTED: coiled-coil domain-containing protein 14 isoform X1 [Homo sapiens] ;gi|530375145|ref|XP_005247768.1|:CCDC14:PREDICTED: coiled-coil domain-containing protein 14 isoform X2 [Homo sapiens] ;	∞	0.0312876	0.00034918	0.00022433	7.421e-05	8.291e-05	0.000182657	7	4	1	1	3.25	0	0	0	0	#DIV/0!	0	0	0	0	0
CCDC88C	protein Daple [Homo sapiens]	∞	0.0402578	2.344e-05	0.00013177	0.00031386	0.00015584	0.000156228	1	5	9	4	4.75	0	0	0	0	#DIV/0!	0	0	0	0	0
CENPE	centromere-associated protein E isoform 1 [Homo sapiens]	∞	0.000311862	0.00096803	0.00071236	0.00115208	0.00064354	0.000869002	55	36	44	22	39.25	0	0	0	0	#DIV/0!	0	0	0	0	0
CENPJ	centromere protein J [Homo sapiens]	∞	0.0291764	0.00014212	0.00019973	0.00021143	0	0.000184427	4	5	4	0	3.25	0	0	0	0	#DIV/0!	0	0	0	0	0
CEP290	1 genes:CEP290. 1 proteins in this group did not match any genes. gi|109255234|ref|NP_079390.3|:CEP290:centrosomal protein of 290 kDa [Homo sapiens] ;gi|578824257|ref|XP_006719672.1|:PREDICTED: centrosomal protein of 290 kDa isoform X5 [Homo sapiens] ;	∞	0.000770559	0.00013424	8.624e-05	0.00017117	9.561e-05	0.000121815	7	4	6	3	5	0	0	0	0	#DIV/0!	0	0	0	0	0
CEP295	1 genes:CEP295. 1 proteins in this group did not match any genes. gi|160420295|ref|NP_203753.1|:CEP295:centrosomal protein KIAA1731 [Homo sapiens] ;gi|530397534|ref|XP_005274423.1|:CEP295:PREDICTED: centrosomal protein KIAA1731 isoform X2 [Homo sapiens] ;gi|530397536|ref|XP_005274424.1|:CEP295:PREDICTED: centrosomal protein KIAA1731 isoform X3 [Homo sapiens] ;gi|578822443|ref|XP_006718993.1|:PRED…	∞	0.0111889	0.00045693	0.00020549	0.00019033	0.00015188	0.000251158	25	10	7	5	11.75	0	0	0	0	#DIV/0!	0	0	0	0	0
CEP97	PREDICTED: centrosomal protein of 97 kDa isoform X3 [Homo sapiens]	∞	0.0479952	0.00028603	0.00012863	0.00017021	0	0.000194957	5	2	2	0	2.25	0	0	0	0	#DIV/0!	0	0	0	0	0
CGNL1	1 genes:CGNL1.gi|356874770|ref|NP_001239264.1|:CGNL1:cingulin-like protein 1 [Homo sapiens] ;gi|530406570|ref|XP_005254784.1|:CGNL1:PREDICTED: cingulin-like protein 1 isoform X2 [Homo sapiens] ;	∞	0.000304529	0.00032861	0.00020525	0.00027159	0.00018205	0.000246875	9	5	5	3	5.5	0	0	0	0	#DIV/0!	0	0	0	0	0
CYLD	1 genes:CYLD. 2 proteins in this group did not match any genes. gi|14165258|ref|NP_056062.1|:CYLD:ubiquitin carboxyl-terminal hydrolase CYLD isoform 1 [Homo sapiens] ;gi|578828868|ref|XP_006721214.1|:PREDICTED: ubiquitin carboxyl-terminal hydrolase CYLD isoform X6 [Homo sapiens] ;gi|578828871|ref|XP_006721215.1|:PREDICTED: ubiquitin carboxyl-terminal hydrolase CYLD isoform X7 [Homo sapiens] ;	∞	0.000857304	0.00029836	0.00022363	0.00014795	0.00033058	0.00025013	6	4	2	4	4	0	0	0	0	#DIV/0!	0	0	0	0	0
DYNC1LI1	cytoplasmic dynein 1 light intermediate chain 1 [Homo sapiens]	∞	0.0029385	0.00090897	0.00081755	0.00027045	0.00075534	0.000688077	10	8	2	5	6.25	0	0	0	0	#DIV/0!	0	0	0	0	0
IFT74	intraflagellar transport protein 74 homolog isoform a [Homo sapiens]	∞	0.0152538	0.00055462	0.0012471	0.00070722	0.00026336	0.000693075	7	14	6	2	7.25	0	0	0	0	#DIV/0!	0	0	0	0	0
MAP7D3	MAP7 domain-containing protein 3 isoform 1 [Homo sapiens]	∞	0.0294582	0.00190714	0.00161684	0.00125136	0	0.00159178	35.1429	26.5	15.5	0	19.2857	0	0	0	0	#DIV/0!	0	0	0	0	0
MAP7D3	PREDICTED: MAP7 domain-containing protein 3 isoform X1 [Homo sapiens]	∞	0.0101323	0.00031822	0.00161869	0.00125279	0.00189621	0.00127148	5.85714	26.5	15.5	21	17.2143	0	0	0	0	#DIV/0!	0	0	0	0	0
MIS18BP1	PREDICTED: mis18-binding protein 1 isoform X1 [Homo sapiens]	∞	0.0360654	0.00016798	0.00023607	0.00031238	0	0.00023881	4	5	5	0	3.5	0	0	0	0	#DIV/0!	0	0	0	0	0
NCKAP5L	PREDICTED: nck-associated protein 5-like isoform X3 [Homo sapiens]	∞	6.11023e-05	0.00014255	0.00020033	0.00021206	0.00023691	0.000197962	4	5	4	4	4.25	0	0	0	0	#DIV/0!	0	0	0	0	0
NINL	0 genes:. 2 proteins in this group did not match any genes. gi|530425644|ref|XP_005260735.1|:PREDICTED: ninein-like protein isoform X1 [Homo sapiens] ;gi|578835370|ref|XP_006723615.1|:PREDICTED: ninein-like protein isoform X4 [Homo sapiens] ;	∞	2.06922e-06	0.0328148	0.0427807	0.0412798	0.0401826	0.0392645	965	1119	816	711	902.75	0	0	0	0	#DIV/0!	0	0	0	0	0
ODF2	1 genes:ODF2. 9 proteins in this group did not match any genes. gi|310750400|ref|NP_702913.1|:ODF2:outer dense fiber protein 2 isoform 1 [Homo sapiens] ;gi|334278913|ref|NP_001229281.1|:ODF2:outer dense fiber protein 2 isoform 11 [Homo sapiens] ;gi|530391159|ref|XP_005252067.1|:ODF2:PREDICTED: outer dense fiber protein 2 isoform X1 [Homo sapiens] ;gi|530391161|ref|XP_005252068.1|:ODF2:PREDICTED: …	∞	0.0126804	0.00010647	0.00017955	0.00031678	0.00044238	0.000261295	2	3	4	5	3.5	0	0	0	0	#DIV/0!	0	0	0	0	0
OFD1	1 genes:OFD1. 5 proteins in this group did not match any genes. gi|4503179|ref|NP_003602.1|:OFD1:oral-facial-digital syndrome 1 protein [Homo sapiens] ;gi|530421272|ref|XP_005274656.1|:PREDICTED: oral-facial-digital syndrome 1 protein isoform X1 [Homo sapiens] ;gi|530421274|ref|XP_005274657.1|:PREDICTED: oral-facial-digital syndrome 1 protein isoform X2 [Homo sapiens] ;gi|530421276|ref|XP_0052746…	∞	0.00522558	0.00061068	0.00047532	0.00062895	0.00015614	0.000467772	13	9	9	2	8.25	0	0	0	0	#DIV/0!	0	0	0	0	0
PCNT	1 genes:PCNT. 5 proteins in this group did not match any genes. gi|530419244|ref|XP_005261181.1|:PCNT:PREDICTED: pericentrin isoform X1 [Homo sapiens] ;gi|530419248|ref|XP_005261183.1|:PREDICTED: pericentrin isoform X3 [Homo sapiens] ;gi|530419250|ref|XP_005261184.1|:PREDICTED: pericentrin isoform X4 [Homo sapiens] ;gi|530419252|ref|XP_005261185.1|:PREDICTED: pericentrin isoform X5 [Homo sapiens]…	∞	0.0306918	0.00022726	3.194e-05	0.00010565	9.442e-05	0.000114818	16	2	5	4	6.75	0	0	0	0	#DIV/0!	0	0	0	0	0
TMEM131	1 genes:TMEM131.gi|150456424|ref|NP_056163.1|:TMEM131:transmembrane protein 131 [Homo sapiens] ;gi|530368580|ref|XP_005263969.1|:TMEM131:PREDICTED: transmembrane protein 131 isoform X4 [Homo sapiens] ;	∞	0.0166535	0.00017672	8.515e-05	3.756e-05	8.392e-05	9.58375e-05	7	3	1	2	3.25	0	0	0	0	#DIV/0!	0	0	0	0	0
TP53BP2	1 genes:TP53BP2. 1 proteins in this group did not match any genes. gi|112799849|ref|NP_001026855.2|:TP53BP2:apoptosis-stimulating of p53 protein 2 isoform 1 [Homo sapiens] ;gi|530366444|ref|XP_005273303.1|:PREDICTED: apoptosis-stimulating of p53 protein 2 isoform X1 [Homo sapiens] ;	∞	0.0255132	0.00016769	0.00018853	0	0.00020902	0.000188413	4	4	0	3	2.75	0	0	0	0	#DIV/0!	0	0	0	0	0
TTC17	PREDICTED: tetratricopeptide repeat protein 17 isoform X1 [Homo sapiens]	∞	0.000400522	0.0004365	0.00035691	0.00023613	0.0002638	0.000323335	11	8	4	4	6.75	0	0	0	0	#DIV/0!	0	0	0	0	0
USP54	1 genes:USP54. 7 proteins in this group did not match any genes. gi|124001558|ref|NP_689799.3|:USP54:inactive ubiquitin carboxyl-terminal hydrolase 54 [Homo sapiens] ;gi|530393170|ref|XP_005269635.1|:PREDICTED: inactive ubiquitin carboxyl-terminal hydrolase 54 isoform X1 [Homo sapiens] ;gi|530393178|ref|XP_005269639.1|:USP54:PREDICTED: inactive ubiquitin carboxyl-terminal hydrolase 54 isoform X5 …	∞	0.000137725	0.0002823	0.00022217	0.00016799	0.00018767	0.000215032	10	7	4	4	6.25	0	0	0	0	#DIV/0!	0	0	0	0	0
KIF14	kinesin-like protein KIF14 [Homo sapiens]	26.797	8.55321e-05	0.00072116	0.00107024	0.00098702	0.00071913	0.000874388	25	33	23	15	24	3.325e-05	3.373e-05	0	3.091e-05	3.263e-05	1	1	0	1	0.75
NEDD1	1 genes:NEDD1. 1 proteins in this group did not match any genes. gi|530399758|ref|XP_005268701.1|:NEDD1:PREDICTED: protein NEDD1 isoform X1 [Homo sapiens] ;gi|578823306|ref|XP_006719299.1|:PREDICTED: protein NEDD1 isoform X2 [Homo sapiens] ;	14.4701	0.000514719	0.00392	0.00552902	0.00413518	0.00272444	0.00407716	55	69	39	23	46.5	0.00041079	0	0	0.00015274	0.000281765	5	0	0	2	1.75
LUZP1	leucine zipper protein 1 [Homo sapiens]	13.6459	0.00190399	0.00225324	0.00273196	0.00433797	0.00212942	0.00286315	51	55	66	29	50.25	5.093e-05	0	0.00024713	0.00033139	0.000209817	1	0	2	7	2.5
TNRC6A	PREDICTED: trinucleotide repeat-containing gene 6A protein isoform X2 [Homo sapiens]	13.512	0.0142176	0.00168983	0.00145282	0.00103514	0.00028911	0.00111673	68	52	28	7	38.75	0	2.906e-05	0.000139	7.988e-05	8.26467e-05	0	1	2	3	1.5
HIST2H4B	histone H4 [Homo sapiens]	12.7142	0.00155593	0.0156925	0.0306154	0.0384509	0.0360526	0.0302028	34	59	56	47	49	0.0015961	0.00107938	0	0.00445106	0.00237551	3	2	0	9	3.5
PRRC2B	protein PRRC2B [Homo sapiens]	11.8348	0.000301178	0.00070381	0.00038365	0.00047592	0.0006005	0.00054097	33	16	15	16.9412	20.2353	0	0	0	4.571e-05	4.571e-05	0	0	0	2	0.5
FAM83H	1 genes:FAM83H. 3 proteins in this group did not match any genes. gi|157311635|ref|NP_940890.3|:FAM83H:protein FAM83H [Homo sapiens] ;gi|578839722|ref|XP_006725150.1|:PREDICTED: protein FAM83H isoform X1 [Homo sapiens] ;gi|578839724|ref|XP_006725151.1|:PREDICTED: protein FAM83H isoform X2 [Homo sapiens] ;gi|578839728|ref|XP_006725153.1|:PREDICTED: protein FAM83H isoform X4 [Homo sapiens] ;	10.6885	0.00603519	0.00076611	0.00045333	0.00035991	0.00026805	0.00046185	19	10	6	4	9.75	0	0	0	4.321e-05	4.321e-05	0	0	0	1	0.25
TNRC6B	1 genes:TNRC6B.gi|148491080|ref|NP_055903.2|:TNRC6B:trinucleotide repeat-containing gene 6B protein isoform 2 [Homo sapiens] ;gi|241982729|ref|NP_001155973.1|:TNRC6B:trinucleotide repeat-containing gene 6B protein isoform 1 [Homo sapiens] ;	8.50815	0.00387035	0.00057941	0.00089957	0.00094406	0.00036684	0.00069747	21	29	23	8	20.25	9.541e-05	3.226e-05	0	0.00011826	8.19767e-05	3	1	0	4	2
KIAA1671	PREDICTED: uncharacterized protein KIAA1671 isoform X3 [Homo sapiens]	6.88135	0.0120732	0.00389577	0.00195322	0.00156638	0.00144368	0.00221476	148	66	40	33	71.75	0	0.00027702	0	0.00036668	0.00032185	0	9	0	13	5.5
SIPA1L3	1 genes:SIPA1L3. 1 proteins in this group did not match any genes. gi|530416035|ref|XP_005258728.1|:SIPA1L3:PREDICTED: signal-induced proliferation-associated 1-like protein 3 isoform X1 [Homo sapiens] ;gi|530416037|ref|XP_005258729.1|:PREDICTED: signal-induced proliferation-associated 1-like protein 3 isoform X2 [Homo sapiens] ;	6.27419	0.000311961	0.00026692	0.00018006	0.00015884	0.00017745	0.000195817	10	6	4	4	6	0	3.121e-05	0	0	3.121e-05	0	1	0	0	0.25
MPHOSPH9	1 genes:MPHOSPH9. 1 proteins in this group did not match any genes. gi|508083049|ref|NP_073619.3|:MPHOSPH9:M-phase phosphoprotein 9 [Homo sapiens] ;gi|578823167|ref|XP_006719250.1|:PREDICTED: M-phase phosphoprotein 9 isoform X1 [Homo sapiens] ;	5.42233	0.000178981	0.00060278	0.00058733	0.00041847	0.00040072	0.000502325	15	13	7	6	10.25	9.264e-05	0	0	0	9.264e-05	2	0	0	0	0.5
ZNF598	zinc finger protein 598 [Homo sapiens]	5.37034	0.0346772	0.00036811	0.00029561	0.00031293	0	0.00032555	7	5	4	0	4	6.062e-05	0	0	0	6.062e-05	1	0	0	0	0.25
IFT81	intraflagellar transport protein 81 homolog isoform 1 [Homo sapiens]	4.5114	0.00998815	0.00098453	0.00063251	0.00146466	0.00046751	0.000887302	14	8	14	4	10	0	0	0.00019668	0	0.00019668	0	0	1	0	0.25
ALMS1	Alstrom syndrome protein 1 [Homo sapiens]	4.30802	0.0134881	0.00052454	0.0003205	0.00035624	0.00015161	0.000338223	46	25	21	8	25	7.887e-05	0.00012	0	3.666e-05	7.851e-05	6	9	0	3	4.5
HNRNPH2	heterogeneous nuclear ribonucleoprotein H2 [Homo sapiens]	3.86006	0.0393264	0.00049409	0.00157723	0.0026908	0.0010949	0.00146426	4.66667	13.25	17.0833	6.22222	10.3056	0.00016643	0	0.00059224	0	0.000379335	1.36364	0	2	0	0.840909
DYNC1H1	cytoplasmic dynein 1 heavy chain 1 [Homo sapiens]	3.69039	0.0074862	0.00049115	0.00031061	0.00033489	0.00022108	0.000339432	48	27	22	13	27.5	8.256e-05	4.786e-05	0.0001717	6.579e-05	9.19775e-05	7	4	6	6	5.75
CKAP2	1 genes:CKAP2. 1 proteins in this group did not match any genes. gi|148664201|ref|NP_001091995.1|:CKAP2:cytoskeleton-associated protein 2 isoform 2 [Homo sapiens] ;gi|148664244|ref|NP_060674.3|:CKAP2:cytoskeleton-associated protein 2 isoform 1 [Homo sapiens] ;gi|530402271|ref|XP_005266400.1|:PREDICTED: cytoskeleton-associated protein 2 isoform X1 [Homo sapiens] ;gi|530402273|ref|XP_005266401.1|:C…	3.53695	0.00117131	0.00041762	0.00046952	0.00072482	0.0005784	0.00054759	6	6	7	5	6	0.00016047	0	0	0.00014917	0.00015482	2	0	0	2	1
ANKRD26	1 genes:ANKRD26.gi|154354990|ref|NP_055730.2|:ANKRD26:ankyrin repeat domain-containing protein 26 isoform 1 [Homo sapiens] ;gi|365812504|ref|NP_001242982.1|:ANKRD26:ankyrin repeat domain-containing protein 26 isoform 2 [Homo sapiens] ;	3.39107	0.0153078	0.0002224	0.00025005	0.00028951	4.62e-05	0.00020204	8	8	7	1	6	0	0	0	5.958e-05	5.958e-05	0	0	0	2	0.5
ACE	angiotensin-converting enzyme isoform 1 precursor [Homo sapiens]	3.11032	0.00209235	0.00152882	0.00196437	0.0015704	0.0019964	0.001765	42	48	29	33	38	0.00075528	0.00034051	0.00101805	0.00015602	0.000567465	18	8	10	4	10
RPL19	1 genes:RPL19.gi|4506609|ref|NP_000972.1|:RPL19:60S ribosomal protein L19 [Homo sapiens] ;gi|530412640|ref|XP_005257621.1|:RPL19:PREDICTED: 60S ribosomal protein L19 isoform X1 [Homo sapiens] ;	3.02577	0.0022862	0.00121273	0.00136345	0.00108248	0.00080621	0.00111622	5	5	3	2	3.75	0.00027959	0.00056722	0	0.0002599	0.000368903	1	2	0	1	1
TOP2A	DNA topoisomerase 2-alpha [Homo sapiens]	3.02321	0.000880857	0.00262106	0.00303717	0.00336372	0.0042317	0.00331341	84.4118	87	72.8182	82	81.5575	0.00078745	0.00102517	0.0012158	0.00135554	0.00109599	22	28.2353	14	40.7407	26.244

## Sheet: CT BICD1
				BICD1-BioID										BioID control
				distributed normalized spectral abundance factor (dNSAF)					distributed Spectral Counts					distributed normalized spectral abundance factor (dNSAF)					distributed Spectral Counts
NCBI_Gene	Description	enrichment ratio	p-value	dNSAF 1	dNSAF 2	dNSAF 3	dNSAF 4	avg dNSAF	dSC 1	dSC 2	dSC 3	dSC 4	avg dSCs	dNSAF 1	dNSAF 2	dNSAF 3	dNSAF 4	avg dNSAF	dSC 1	dSC 2	dSC 3	dSC 4	avg dSCs
AGO1	protein argonaute-1 [Homo sapiens]	∞	0.00667624	0.0001204	5.876e-05	8.883e-05	3.436e-05	7.55875e-05	3.61636	2.34783	2.59048	1.2381	2.44819	0	0	0	0	0	0	0	0	0	0
AGO3	PREDICTED: protein argonaute-3 isoform X1 [Homo sapiens]	∞	0.000309665	0.0001245	9.853e-05	0.00013818	0.00018657	0.000136945	3.75273	3.95031	4.04361	6.74603	4.62317	0	0	0	0	0	0	0	0	0	0
ARFGAP3	ADP-ribosylation factor GTPase-activating protein 3 isoform 1 [Homo sapiens]	∞	0.0357475	0.00014218	0	0.00022781	0.00013828	0.000169423	2.57143	0	4	3	2.39286	0	0	0	0	0	0	0	0	0	0
ARHGAP12	1 genes:ARHGAP12. 2 proteins in this group did not match any genes. gi|398303807|ref|NP_001257624.1|:ARHGAP12:rho GTPase-activating protein 12 isoform 2 [Homo sapiens] ;gi|398303812|ref|NP_001257626.1|:ARHGAP12:rho GTPase-activating protein 12 isoform 4 [Homo sapiens] ;gi|530392550|ref|XP_005252701.1|:ARHGAP12:PREDICTED: rho GTPase-activating protein 12 isoform X1 [Homo sapiens] ;gi|578818657|ref…	∞	0.0032981	0.00010178	7.652e-05	3.494e-05	0.00011312	8.159e-05	3	3	1	4	2.75	0	0	0	0	0	0	0	0	0	0
ARHGAP32	1 genes:ARHGAP32. 1 proteins in this group did not match any genes. gi|218083800|ref|NP_001136157.1|:ARHGAP32:rho GTPase-activating protein 32 isoform 1 [Homo sapiens] ;gi|530398510|ref|XP_005271793.1|:PREDICTED: rho GTPase-activating protein 32 isoform X1 [Homo sapiens] ;	∞	0.0396466	4.101e-05	1.028e-05	5.633e-05	1.14e-05	2.9755e-05	3	1	4	1	2.25	0	0	0	0	0	0	0	0	0	0
AZI2	PREDICTED: 5-azacytidine-induced protein 2 isoform X1 [Homo sapiens]	∞	0.00183703	0.00029114	0.00010944	0.00022491	0.00018202	0.000201877	4	2	3	3	3	0	0	0	0	0	0	0	0	0	0
BICD1	protein bicaudal D homolog 1 isoform 1 [Homo sapiens]	∞	1.27485e-07	0.162246	0.163118	0.188306	0.171638	0.171327	5544.41	7414.5	6247.43	7036.13	6560.62	0	0	0	0	0	0	0	0	0	0
BORCS5	1 genes:BORCS5. 1 proteins in this group did not match any genes. gi|17157999|ref|NP_477517.1|:BORCS5:loss of heterozygosity 12 chromosomal region 1 protein [Homo sapiens] ;gi|530398989|ref|XP_005253353.1|:PREDICTED: loss of heterozygosity 12 chromosomal region 1 protein isoform X1 [Homo sapiens] ;	∞	0.010736	0.00072784	0.00043775	0.00029988	0.00109212	0.000639398	5	4	2	9	5	0	0	0	0	0	0	0	0	0	0
C20orf27	1 genes:C20orf27.gi|385862238|ref|NP_001245359.1|:C20orf27:UPF0687 protein C20orf27 isoform 2 [Homo sapiens] ;gi|85362737|ref|NP_001034229.1|:C20orf27:UPF0687 protein C20orf27 isoform 1 [Homo sapiens] ;	∞	0.00101063	0.00081987	0.00036983	0.00050669	0.00054676	0.000560787	5	3	3	4	3.75	0	0	0	0	0	0	0	0	0	0
C2CD3	1 genes:C2CD3. 1 proteins in this group did not match any genes. gi|530396566|ref|XP_005273950.1|:PREDICTED: C2 domain-containing protein 3 isoform X1 [Homo sapiens] ;gi|557440801|ref|NP_001273506.1|:C2CD3:C2 domain-containing protein 3 isoform 1 [Homo sapiens] ;	∞	0.00604128	1.212e-05	3.645e-05	4.994e-05	5.052e-05	3.72575e-05	1	4	4	5	3.5	0	0	0	0	0	0	0	0	0	0
CCDC88C	protein Daple [Homo sapiens]	∞	0.00100369	0.00014069	0.00031731	0.00021737	0.00019937	0.000218685	10	30	15	17	18	0	0	0	0	0	0	0	0	0	0
CEP120	1 genes:CEP120.gi|261245061|ref|NP_001159698.1|:CEP120:centrosomal protein of 120 kDa isoform 2 [Homo sapiens] ;gi|530379724|ref|XP_005271958.1|:CEP120:PREDICTED: centrosomal protein of 120 kDa isoform X2 [Homo sapiens] ;gi|96975038|ref|NP_694955.2|:CEP120:centrosomal protein of 120 kDa isoform 1 [Homo sapiens] ;	∞	0.0342604	5.944e-05	6.703e-05	0	9.91e-05	7.519e-05	2	3	0	4	2.25	0	0	0	0	0	0	0	0	0	0
CEP41	centrosomal protein of 41 kDa isoform 1 [Homo sapiens]	∞	0.00820018	0.00015298	0.00017252	0.00039394	0.00044635	0.000291447	2	3	5	7	4.25	0	0	0	0	0	0	0	0	0	0
CFAP97	PREDICTED: UPF0501 protein KIAA1430 isoform X1 [Homo sapiens]	∞	0.000191489	0.00021452	0.00016128	0.00016572	0.00026824	0.00020244	4	4	3	6	4.25	0	0	0	0	0	0	0	0	0	0
CLIP1	1 genes:CLIP1. 4 proteins in this group did not match any genes. gi|351542242|ref|NP_001234926.1|:CLIP1:CAP-Gly domain-containing linker protein 1 isoform c [Homo sapiens] ;gi|38044112|ref|NP_937883.1|:CLIP1:CAP-Gly domain-containing linker protein 1 isoform b [Homo sapiens] ;gi|4506751|ref|NP_002947.1|:CLIP1:CAP-Gly domain-containing linker protein 1 isoform a [Homo sapiens] ;gi|578824105|ref|XP…	∞	0.0342622	3.968e-05	4.475e-05	0	6.616e-05	5.01967e-05	2	3	0	4	2.25	0	0	0	0	0	0	0	0	0	0
CNOT4	1 genes:CNOT4.gi|300069011|ref|NP_001177776.1|:CNOT4:CCR4-NOT transcription complex subunit 4 isoform c [Homo sapiens] ;gi|300069013|ref|NP_001177777.1|:CNOT4:CCR4-NOT transcription complex subunit 4 isoform d [Homo sapiens] ;gi|300069015|ref|NP_001177778.1|:CNOT4:CCR4-NOT transcription complex subunit 4 isoform e [Homo sapiens] ;gi|300069017|ref|NP_001177779.1|:CNOT4:CCR4-NOT transcription compl…	∞	0.0284991	0	0.00013364	9.155e-05	0.00011114	0.00011211	0	4	2	3	2.25	0	0	0	0	0	0	0	0	0	0
DBT	lipoamide acyltransferase component of branched-chain alpha-keto acid dehydrogenase complex, mitochondrial precursor [Homo sapiens]	∞	0.0123688	0.00071032	0.00035602	0.00030485	0.00019738	0.000392143	12	8	5	4	7.25	0	0	0	0	0	0	0	0	0	0
ENSA	1 genes:ENSA.gi|46389550|ref|NP_996925.1|:ENSA:alpha-endosulfine isoform 1 [Homo sapiens] ;gi|46389552|ref|NP_996926.1|:ENSA:alpha-endosulfine isoform 2 [Homo sapiens] ;gi|46389554|ref|NP_996927.1|:ENSA:alpha-endosulfine isoform 4 [Homo sapiens] ;gi|4758272|ref|NP_004427.1|:ENSA:alpha-endosulfine isoform 3 [Homo sapiens] ;	∞	0.000283316	0.00104129	0.00078284	0.00085804	0.00138884	0.00101775	5	5	4	8	5.5	0	0	0	0	0	0	0	0	0	0
ERC1	ELKS/Rab6-interacting/CAST family member 1 isoform epsilon [Homo sapiens]	∞	0.0477542	0	0.00046129	0.00018433	0.00038361	0.000343077	0	24	7	18	12.25	0	0	0	0	0	0	0	0	0	0
FAM188B	protein FAM188B [Homo sapiens]	∞	0.000445159	0.00011307	5.667e-05	0.00011646	9.426e-05	9.5115e-05	3	2	3	3	2.75	0	0	0	0	0	0	0	0	0	0
GGA3	1 genes:GGA3. 2 proteins in this group did not match any genes. gi|14719400|ref|NP_054720.1|:GGA3:ADP-ribosylation factor-binding protein GGA3 isoform short [Homo sapiens] ;gi|20336267|ref|NP_619525.1|:GGA3:ADP-ribosylation factor-binding protein GGA3 isoform long [Homo sapiens] ;gi|289577109|ref|NP_001166174.1|:GGA3:ADP-ribosylation factor-binding protein GGA3 isoform 1 [Homo sapiens] ;gi|289577…	∞	0.00235463	8.27e-05	0.00015543	8.518e-05	6.894e-05	9.80625e-05	2	5	2	2	2.75	0	0	0	0	0	0	0	0	0	0
GRK2	beta-adrenergic receptor kinase 1 [Homo sapiens]	∞	0.000101817	0.00020705	0.00012453	0.00017061	0.00020712	0.000177327	5	4	4	6	4.75	0	0	0	0	0	0	0	0	0	0
HGS	1 genes:HGS. 1 proteins in this group did not match any genes. gi|4758528|ref|NP_004703.1|:HGS:hepatocyte growth factor-regulated tyrosine kinase substrate [Homo sapiens] ;gi|530413109|ref|XP_005257851.1|:PREDICTED: hepatocyte growth factor-regulated tyrosine kinase substrate isoform X1 [Homo sapiens] ;	∞	0.0241059	0.00011016	0.00022085	3.782e-05	9.183e-05	0.000115165	3	8	1	3	3.75	0	0	0	0	0	0	0	0	0	0
HSPA2	heat shock-related 70 kDa protein 2 [Homo sapiens]	∞	0.0359338	0.00033301	0.00023022	5.282e-05	8.561e-05	0.000175415	7.45823	6.85845	1.14858	2.30009	4.44133	0	0	0	0	0	0	0	0	0	0
IFFO1	PREDICTED: intermediate filament family orphan 1 isoform X4 [Homo sapiens]	∞	1.9947e-05	0.00025474	0.00034473	0.00031487	0.00038224	0.000324145	5	9	6	9	7.25	0	0	0	0	0	0	0	0	0	0
KANK2	1 genes:KANK2.gi|209969812|ref|NP_001129663.1|:KANK2:KN motif and ankyrin repeat domain-containing protein 2 isoform 2 [Homo sapiens] ;gi|258613875|ref|NP_056308.3|:KANK2:KN motif and ankyrin repeat domain-containing protein 2 isoform 1 [Homo sapiens] ;	∞	0.00646866	0.00013411	5.041e-05	0.00017267	8.384e-05	0.000110258	4	2	5	3	3.5	0	0	0	0	0	0	0	0	0	0
KIAA0232	1 genes:KIAA0232. 1 proteins in this group did not match any genes. gi|154689866|ref|NP_001094060.1|:KIAA0232:uncharacterized protein KIAA0232 [Homo sapiens] ;gi|578808307|ref|XP_006713997.1|:PREDICTED: uncharacterized protein KIAA0232 isoform X2 [Homo sapiens] ;	∞	0.00085002	4.091e-05	7.688e-05	8.427e-05	5.115e-05	6.33025e-05	2	5	4	3	3.5	0	0	0	0	0	0	0	0	0	0
KIF7	0 genes:. 3 proteins in this group did not match any genes. gi|530407114|ref|XP_005254959.1|:PREDICTED: kinesin-like protein KIF7 isoform X1 [Homo sapiens] ;gi|530407116|ref|XP_005254960.1|:PREDICTED: kinesin-like protein KIF7 isoform X2 [Homo sapiens] ;gi|530407118|ref|XP_005254961.1|:PREDICTED: kinesin-like protein KIF7 isoform X3 [Homo sapiens] ;	∞	0.00311062	0.00036116	0.0001118	0.0002407	0.00026564	0.000244825	17	7	11	15	12.5	0	0	0	0	0	0	0	0	0	0
LASP1	LIM and SH3 domain protein 1 isoform a [Homo sapiens]	∞	0.0316179	0	0.00041092	0.00045039	0.00063788	0.00049973	0	5	4	7	4	0	0	0	0	0	0	0	0	0	0
LCP1	PREDICTED: plastin-2 isoform X2 [Homo sapiens]	∞	0.00107464	0.00027303	0.00027368	0.00037496	0.00015173	0.00026835	6	8	8	4	6.5	0	0	0	0	0	0	0	0	0	0
LOC101930123	PREDICTED: eukaryotic elongation factor 2 kinase-like [Homo sapiens]	∞	0.0467652	0	5.917e-05	8.107e-05	0.00013122	9.04867e-05	0	2	2	4	2	0	0	0	0	0	0	0	0	0	0
METTL2A	2 genes:METTL2A,METTL2B.gi|165932358|ref|NP_859076.3|:METTL2A:methyltransferase-like protein 2A [Homo sapiens] ;gi|93141204|ref|NP_060866.2|:METTL2B:methyltransferase-like protein 2B [Homo sapiens] ;	∞	0.0334501	0	0.00017024	0.00015549	0.00025168	0.00019247	0	3	2	4	2.25	0	0	0	0	0	0	0	0	0	0
NADK	1 genes:NADK.gi|312222777|ref|NP_001185923.1|:NADK:NAD kinase isoform 2 [Homo sapiens] ;gi|578799623|ref|XP_006710900.1|:NADK:PREDICTED: NAD kinase isoform X4 [Homo sapiens] ;gi|578799627|ref|XP_006710902.1|:NADK:PREDICTED: NAD kinase isoform X6 [Homo sapiens] ;	∞	0.00192332	0.00014483	0.00010888	4.973e-05	0.00012073	0.000106042	3	3	1	3	2.5	0	0	0	0	0	0	0	0	0	0
NANS	sialic acid synthase [Homo sapiens]	∞	0.0246389	0.00047685	0.00017925	8.186e-05	0.000265	0.00025074	6	3	1	4	3.5	0	0	0	0	0	0	0	0	0	0
NCKAP5L	PREDICTED: nck-associated protein 5-like isoform X3 [Homo sapiens]	∞	0.00783722	6.416e-05	2.412e-05	2.203e-05	4.457e-05	3.872e-05	3	1.5	1	2.5	2	0	0	0	0	0	0	0	0	0	0
NCKAP5L	PREDICTED: nck-associated protein 5-like isoform X1 [Homo sapiens]	∞	0.00783776	6.64e-05	2.496e-05	2.28e-05	4.613e-05	4.00725e-05	3	1.5	1	2.5	2	0	0	0	0	0	0	0	0	0	0
PAN3	1 genes:PAN3.gi|281427224|ref|NP_787050.6|:PAN3:PAB-dependent poly(A)-specific ribonuclease subunit 3 [Homo sapiens] ;gi|530402250|ref|XP_005266390.1|:PAN3:PREDICTED: PAB-dependent poly(A)-specific ribonuclease subunit 3 isoform X2 [Homo sapiens] ;	∞	0.0115181	9.65e-05	9.673e-05	0.00029819	0.00021451	0.000176483	3	4	9	8	6	0	0	0	0	0	0	0	0	0	0
PIBF1	progesterone-induced-blocking factor 1 [Homo sapiens]	∞	0.00315742	0.00011307	0.00036836	0.00031057	0.00037702	0.000292255	3	13	8	12	9	0	0	0	0	0	0	0	0	0	0
PIN1	peptidyl-prolyl cis-trans isomerase NIMA-interacting 1 [Homo sapiens]	∞	0.0255583	0	0.00052638	0.00054088	0.00043774	0.000501667	0	4	3	3	2.5	0	0	0	0	0	0	0	0	0	0
POC5	1 genes:POC5.gi|151101311|ref|NP_001092741.1|:POC5:centrosomal protein POC5 isoform 1 [Homo sapiens] ;gi|530379158|ref|XP_005248493.1|:POC5:PREDICTED: centrosomal protein POC5 isoform X2 [Homo sapiens] ;	∞	0.00758385	0.00029772	0.00011191	0.00030666	0.00012409	0.000210095	6	3	6	3	4.5	0	0	0	0	0	0	0	0	0	0
PROSER3	uncharacterized protein C19orf55 [Homo sapiens]	∞	0.0145819	5.944e-05	0.00017875	0.00030612	0.00014865	0.00017324	1	4	5	3	3.25	0	0	0	0	0	0	0	0	0	0
RIBC1	PREDICTED: RIB43A-like with coiled-coils protein 1 isoform X1 [Homo sapiens]	∞	0.00287377	0.0003764	0.00022638	0.00015508	0.00018826	0.00023653	5	4	2	3	3.5	0	0	0	0	0	0	0	0	0	0
SCLT1	sodium channel and clathrin linker 1 [Homo sapiens]	∞	0.0248463	4.147e-05	6.235e-05	0.00017086	6.914e-05	8.5955e-05	1	2	4	2	2.25	0	0	0	0	0	0	0	0	0	0
SHB	SH2 domain-containing adapter protein B [Homo sapiens]	∞	0.0103453	0.00022421	4.214e-05	0.00028868	0.00023363	0.000197165	4	1	5	5	3.75	0	0	0	0	0	0	0	0	0	0
SHROOM3	1 genes:SHROOM3. 1 proteins in this group did not match any genes. gi|530378032|ref|XP_005263219.1|:PREDICTED: protein Shroom3 isoform X1 [Homo sapiens] ;gi|530378038|ref|XP_005263222.1|:SHROOM3:PREDICTED: protein Shroom3 isoform X4 [Homo sapiens] ;gi|578809297|ref|XP_006714345.1|:SHROOM3:PREDICTED: protein Shroom3 isoform X5 [Homo sapiens] ;	∞	0.000114421	7.147e-05	5.373e-05	4.417e-05	7.149e-05	6.0215e-05	5	5	3	6	4.75	0	0	0	0	0	0	0	0	0	0
SIK3	1 genes:SIK3. 1 proteins in this group did not match any genes. gi|528524618|ref|NP_079440.3|:SIK3:serine/threonine-protein kinase SIK3 isoform 1 [Homo sapiens] ;gi|528524620|ref|NP_001268677.1|:SIK3:serine/threonine-protein kinase SIK3 isoform 2 [Homo sapiens] ;gi|530397945|ref|XP_005271538.1|:SIK3:PREDICTED: serine/threonine-protein kinase SIK3 isoform X1 [Homo sapiens] ;gi|530397951|ref|XP_005…	∞	0.0057215	4.32e-05	1.624e-05	6.674e-05	5.401e-05	4.50475e-05	2	1	3	3	2.25	0	0	0	0	0	0	0	0	0	0
SNX18	1 genes:SNX18.gi|157057543|ref|NP_443102.2|:SNX18:sorting nexin-18 isoform b [Homo sapiens] ;gi|157057545|ref|NP_001096045.1|:SNX18:sorting nexin-18 isoform a [Homo sapiens] ;gi|224177511|ref|NP_001138899.1|:SNX18:sorting nexin-18 isoform c [Homo sapiens] ;	∞	0.000866003	0.0001363	0.00020494	9.359e-05	0.00018936	0.000156048	3	6	2	5	4	0	0	0	0	0	0	0	0	0	0
SNX4	sorting nexin-4 [Homo sapiens]	∞	0.000445036	0.00025361	0.00019067	0.00013061	0.00015856	0.000183362	4	4	2	3	3.25	0	0	0	0	0	0	0	0	0	0
SPATA2	PREDICTED: spermatogenesis-associated protein 2 isoform X1 [Homo sapiens]	∞	0.010821	0.00010974	0.00070125	0.00067818	0.00050312	0.000498073	2	17	12	11	10.5	0	0	0	0	0	0	0	0	0	0
SSX2IP	PREDICTED: afadin- and alpha-actinin-binding protein isoform X2 [Homo sapiens]	∞	0.000126513	9.294e-05	0.00016303	0.00011966	0.00013558	0.000127803	2	4.66667	2.5	3.5	3.16667	0	0	0	0	0	0	0	0	0	0
STIL	1 genes:STIL.gi|544711272|ref|NP_001269865.1|:STIL:SCL-interrupting locus protein isoform 2 [Homo sapiens] ;gi|544711278|ref|NP_001269866.1|:STIL:SCL-interrupting locus protein isoform 3 [Homo sapiens] ;gi|578799616|ref|XP_006710897.1|:STIL:PREDICTED: SCL-interrupting locus protein isoform X1 [Homo sapiens] ;	∞	0.0468023	0	0.0001	4.567e-05	0.00011088	8.55167e-05	0	6	2	6	3.5	0	0	0	0	0	0	0	0	0	0
STON1-GTF2A1L	2 genes:STON1,STON1-GTF2A1L.gi|29553944|ref|NP_758515.1|:STON1-GTF2A1L:STON1-GTF2A1L protein isoform 1 [Homo sapiens] ;gi|310703592|ref|NP_001185522.1|:STON1-GTF2A1L:STON1-GTF2A1L protein isoform 2 [Homo sapiens] ;gi|310703594|ref|NP_001185523.1|:STON1-GTF2A1L:STON1-GTF2A1L protein isoform 3 [Homo sapiens] ;gi|310750314|ref|NP_001185524.1|:STON1:stonin-1 [Homo sapiens] ;	∞	0.00485199	9.655e-05	3.629e-05	4.973e-05	0.00010061	7.0795e-05	4	2	2	5	3.25	0	0	0	0	0	0	0	0	0	0
SUFU	suppressor of fused homolog isoform 1 [Homo sapiens]	∞	0.0251877	0	0.00013295	0.00012144	0.00014742	0.000133937	0	3	2	3	2	0	0	0	0	0	0	0	0	0	0
TBC1D31	1 genes:TBC1D31.gi|223005859|ref|NP_663622.2|:TBC1D31:TBC1 domain family member 31 isoform 1 [Homo sapiens] ;gi|530389403|ref|XP_005251159.1|:TBC1D31:PREDICTED: TBC1 domain family member 31 isoform X1 [Homo sapiens] ;	∞	0.008503	8.029e-05	0.00012073	2.757e-05	6.693e-05	7.388e-05	3	6	1	3	3.25	0	0	0	0	0	0	0	0	0	0
TMEM57	macoilin isoform a [Homo sapiens]	∞	0.000840771	0.00085938	0.00200286	0.00154906	0.00139695	0.00145206	20	62	35	39	39	0	0	0	0	0	0	0	0	0	0
TRIM37	1 genes:TRIM37. 4 proteins in this group did not match any genes. gi|52487176|ref|NP_001005207.1|:TRIM37:E3 ubiquitin-protein ligase TRIM37 [Homo sapiens] ;gi|530412266|ref|XP_005257442.1|:TRIM37:PREDICTED: E3 ubiquitin-protein ligase TRIM37 isoform X1 [Homo sapiens] ;gi|530412268|ref|XP_005257443.1|:PREDICTED: E3 ubiquitin-protein ligase TRIM37 isoform X2 [Homo sapiens] ;gi|530412270|ref|XP_0052…	∞	0.0051395	0.00011839	6.675e-05	0.00018291	0.00022205	0.000147525	4	3	6	9	5.5	0	0	0	0	0	0	0	0	0	0
TRIP6	thyroid receptor-interacting protein 6 [Homo sapiens]	∞	0.00701072	0.00023976	0.00013519	6.174e-05	0.0001499	0.000146648	4	3	1	3	2.75	0	0	0	0	0	0	0	0	0	0
TUBB8	tubulin beta-8 chain [Homo sapiens]	∞	0.0114322	0.0001071	0.00020267	6.619e-05	7.43e-05	0.000112565	1.66667	4.19516	1	1.38702	2.06221	0	0	0	0	0	0	0	0	0	0
USP53	1 genes:USP53. 1 proteins in this group did not match any genes. gi|530377852|ref|XP_005263131.1|:PREDICTED: inactive ubiquitin carboxyl-terminal hydrolase 53 isoform X2 [Homo sapiens] ;gi|530377856|ref|XP_005263133.1|:USP53:PREDICTED: inactive ubiquitin carboxyl-terminal hydrolase 53 isoform X4 [Homo sapiens] ;	∞	6.14502e-07	0.00042544	0.00035983	0.00035605	0.00035465	0.000373992	16	18	13	16	15.75	0	0	0	0	0	0	0	0	0	0
TBKBP1	PREDICTED: TANK-binding kinase 1-binding protein 1 isoform X4 [Homo sapiens]	29.9207	7.25935e-06	0.00078867	0.00108122	0.00096765	0.00104417	0.000970428	17	31	20.25	27	23.8125	1.698e-05	5.57e-05	2.462e-05	0	3.24333e-05	0.5	1	0.5	0	0.5
CC2D1A	PREDICTED: coiled-coil and C2 domain-containing protein 1A isoform X3 [Homo sapiens]	22.0605	0.022666	0.00053729	0.00163083	0.00054307	0.00193386	0.00116126	17.8333	72	17.5	77	46.0833	8.089e-05	4.22e-05	2.132e-05	6.615e-05	5.264e-05	3.66667	1.16667	0.666667	1.66667	1.79167
MIB1	E3 ubiquitin-protein ligase MIB1 [Homo sapiens]	18.8918	1.58746e-05	0.00113445	0.0008742	0.00099323	0.00122939	0.00105782	40	41	34	52	41.75	0.00010383	3.405e-05	3.01e-05	0	5.59933e-05	5	1	1	0	1.75
USP54	1 genes:USP54. 5 proteins in this group did not match any genes. gi|124001558|ref|NP_689799.3|:USP54:inactive ubiquitin carboxyl-terminal hydrolase 54 [Homo sapiens] ;gi|530393170|ref|XP_005269635.1|:PREDICTED: inactive ubiquitin carboxyl-terminal hydrolase 54 isoform X1 [Homo sapiens] ;gi|578818975|ref|XP_006717708.1|:PREDICTED: inactive ubiquitin carboxyl-terminal hydrolase 54 isoform X6 [Homo …	18.7149	0.000765983	0.00033885	0.0002038	0.00017451	0.00021185	0.000232252	20	16	10	15	15.25	1.241e-05	0	0	0	1.241e-05	1	0	0	0	0.25
SIPA1L3	1 genes:SIPA1L3. 1 proteins in this group did not match any genes. gi|530416035|ref|XP_005258728.1|:SIPA1L3:PREDICTED: signal-induced proliferation-associated 1-like protein 3 isoform X1 [Homo sapiens] ;gi|530416037|ref|XP_005258729.1|:PREDICTED: signal-induced proliferation-associated 1-like protein 3 isoform X2 [Homo sapiens] ;	17.1832	6.72496e-06	0.00044856	0.0005781	0.00061053	0.00056088	0.000549517	28	48	37	42	38.75	2.346e-05	3.847e-05	3.401e-05	0	3.198e-05	2	2	2	0	1.5
ST7	suppressor of tumorigenicity 7 protein isoform a [Homo sapiens]	15.0423	0.00548314	0.0011421	0.00114434	0.00043953	0.00056347	0.00082236	22.1765	29.5556	8.28571	13.125	18.2857	7.542e-05	0	0	3.392e-05	5.467e-05	2	0	0	0.5	0.625
CCDC138	coiled-coil domain-containing protein 138 [Homo sapiens]	14.7911	0.0071446	0.0004934	0.00035481	0.00013258	0.00028612	0.000316727	11.5	11	3	8	8.375	1.571e-05	2.576e-05	2.277e-05	0	2.14133e-05	0.5	0.5	0.5	0	0.375
CGNL1	cingulin-like protein 1 [Homo sapiens]	13.9797	0.00856031	0.00013148	0.00024712	0.00042886	0.00049321	0.000325167	6	15	19	27	16.75	0	0	2.326e-05	0	2.326e-05	0	0	1	0	0.25
OFD1	PREDICTED: oral-facial-digital syndrome 1 protein isoform X5 [Homo sapiens]	12.0932	0.00352699	4.857e-05	6.573e-05	0.00010006	0.00012957	8.59825e-05	1.66667	3	3.33333	5.33333	3.33333	7.11e-06	0	0	0	7.11e-06	0.333333	0	0	0	0.0833333
OFD1	PREDICTED: oral-facial-digital syndrome 1 protein isoform X4 [Homo sapiens]	12.0903	0.00352683	4.842e-05	6.553e-05	9.976e-05	0.00012917	8.572e-05	1.66667	3	3.33333	5.33333	3.33333	7.09e-06	0	0	0	7.09e-06	0.333333	0	0	0	0.0833333
OFD1	oral-facial-digital syndrome 1 protein [Homo sapiens]	12.0901	0.00352514	4.699e-05	6.359e-05	9.68e-05	0.00012534	8.318e-05	1.66667	3	3.33333	5.33333	3.33333	6.88e-06	0	0	0	6.88e-06	0.333333	0	0	0	0.0833333
CYLD	1 genes:CYLD. 1 proteins in this group did not match any genes. gi|14165258|ref|NP_056062.1|:CYLD:ubiquitin carboxyl-terminal hydrolase CYLD isoform 1 [Homo sapiens] ;gi|578828868|ref|XP_006721214.1|:PREDICTED: ubiquitin carboxyl-terminal hydrolase CYLD isoform X6 [Homo sapiens] ;	11.6066	5.38458e-07	0.00173098	0.00168279	0.00178295	0.00169174	0.00172211	58	75	58	68	64.75	0.00030594	0.0001075	3.168e-05	0	0.000148373	14	3	1	0	4.5
ANKRD26	PREDICTED: ankyrin repeat domain-containing protein 26 isoform X1 [Homo sapiens]	11.442	0.00011193	0.00012393	7.764e-05	8.51e-05	9.183e-05	9.4625e-05	9	7.5	6	8	7.625	0	8.27e-06	0	0	8.27e-06	0	0.5	0	0	0.125
ST7	suppressor of tumorigenicity 7 protein isoform b [Homo sapiens]	11.4394	0.0170788	0.00033279	0.00030963	0.0010406	0.00068607	0.000592272	6.82353	8.44444	20.7143	16.875	13.2143	7.142e-05	0	0	3.213e-05	5.1775e-05	2	0	0	0.5	0.625
PPP2R3A	PREDICTED: serine/threonine-protein phosphatase 2A regulatory subunit B'' subunit alpha isoform X1 [Homo sapiens]	10.3975	0.0003959	0.00039696	0.00072743	0.00058776	0.00070318	0.000603832	16	39	23	34	28	9.083e-05	2.979e-05	7.9e-05	3.268e-05	5.8075e-05	5	1	3	1	2.5
ANKRD26	ankyrin repeat domain-containing protein 26 isoform 1 [Homo sapiens]	10.2618	0.0287058	0	9.408e-05	0.00010312	0.00011127	0.000102823	0	7.5	6	8	5.375	0	1.002e-05	0	0	1.002e-05	0	0.5	0	0	0.125
ABI2	PREDICTED: abl interactor 2 isoform X14 [Homo sapiens]	10.1856	0.00159747	0.00094929	0.00047578	0.00048889	0.00079133	0.000676322	18	12	9	18	14.25	0	6.332e-05	0	6.948e-05	6.64e-05	0	1	0	1	0.5
OCRL	1 genes:OCRL. 1 proteins in this group did not match any genes. gi|13325072|ref|NP_000267.2|:OCRL:inositol polyphosphate 5-phosphatase OCRL-1 isoform a [Homo sapiens] ;gi|578838686|ref|XP_006724823.1|:PREDICTED: inositol polyphosphate 5-phosphatase OCRL-1 isoform X3 [Homo sapiens] ;	9.8193	2.60084e-05	0.00047499	0.00054756	0.00045664	0.00063353	0.00052818	15	23	14	24	19	6.956e-05	3.802e-05	0	0	5.379e-05	3	1	0	0	1
ANXA2	1 genes:ANXA2.gi|209862831|ref|NP_001129487.1|:ANXA2:annexin A2 isoform 2 [Homo sapiens] ;gi|50845388|ref|NP_001002858.1|:ANXA2:annexin A2 isoform 1 [Homo sapiens] ;	9.74104	4.30658e-06	0.00277739	0.00297388	0.0034676	0.00336763	0.00314662	33	47	40	48	42	0.00043138	0.00030317	0.00044668	0.00011088	0.000323028	7	3	5	1	4
IFT74	intraflagellar transport protein 74 homolog isoform a [Homo sapiens]	9.67906	4.53319e-05	0.00247272	0.00350349	0.00333063	0.00332975	0.00315915	52	98	68	84	75.5	0.00073119	0.00028548	0.00010095	0.00018794	0.00032639	21	5	2	3	7.75
CEP164	PREDICTED: centrosomal protein of 164 kDa isoform X3 [Homo sapiens]	9.61647	0.00108452	9.783e-05	0.0001372	7.751e-05	7.058e-05	9.578e-05	6.93333	12.9333	5.33333	6	7.8	1.653e-05	3.39e-06	0	0	9.96e-06	1.6	0.2	0	0	0.45
NEDD1	1 genes:NEDD1. 1 proteins in this group did not match any genes. gi|530399758|ref|XP_005268701.1|:NEDD1:PREDICTED: protein NEDD1 isoform X1 [Homo sapiens] ;gi|578823306|ref|XP_006719299.1|:PREDICTED: protein NEDD1 isoform X2 [Homo sapiens] ;	9.34961	9.08536e-06	0.00252376	0.00257271	0.00264359	0.00306659	0.00270166	59	80	60	86	71.25	0.0005951	0.00010272	0	0.00016906	0.00028896	19	2	0	3	6
CEP55	centrosomal protein of 55 kDa [Homo sapiens]	9.28843	0.000190514	0.00147576	0.00110948	0.0008867	0.00112769	0.00114991	24	24	14	22	21	0.00022512	0	6.527e-05	8.101e-05	0.0001238	5	0	1	1	1.75
CENPE	centromere-associated protein E isoform 1 [Homo sapiens]	9.25507	0.0061226	8.451e-05	0.00023824	0.00030465	0.00029058	0.000229495	8	30	28	33	24.75	0	3.805e-05	2.242e-05	1.392e-05	2.47967e-05	0	3	2	1	1.5
GGA1	1 genes:GGA1. 1 proteins in this group did not match any genes. gi|289577051|ref|NP_001166158.1|:GGA1:ADP-ribosylation factor-binding protein GGA1 isoform 4 [Homo sapiens] ;gi|530419905|ref|XP_005261575.1|:GGA1:PREDICTED: ADP-ribosylation factor-binding protein GGA1 isoform X2 [Homo sapiens] ;gi|578837166|ref|XP_006724291.1|:PREDICTED: ADP-ribosylation factor-binding protein GGA1 isoform X7 [Homo…	9.21068	0.000214607	0.00044931	0.00054047	0.00064792	0.00078655	0.000606063	10	16	14	21	15.25	6.58e-05	0	0	0	6.58e-05	2	0	0	0	0.5
KIAA1462	junctional protein associated with coronary artery disease [Homo sapiens]	8.57815	0.000343467	0.00027293	0.00050508	0.00047574	0.00040252	0.000414068	13	32	22	23	22.5	4.612e-05	5.042e-05	0	0	4.827e-05	3	2	0	0	1.25
CEP192	centrosomal protein of 192 kDa [Homo sapiens]	8.36622	0.00527444	0.00041236	0.00064045	0.00049231	0.00102186	0.000641745	36.6667	75.75	42.5	109	65.9792	9.47e-05	0	8.356e-05	5.186e-05	7.67067e-05	11.5	0	7	3.5	5.5
TBK1	PREDICTED: serine/threonine-protein kinase TBK1 isoform X2 [Homo sapiens]	8.1438	0.000330893	0.00070448	0.00105926	0.00080625	0.00065251	0.000805625	18	36	20	20	23.5	0.00011463	0.00018797	4.154e-05	5.156e-05	9.8925e-05	4	4	1	1	2.5
SDCCAG3	serologically defined colon cancer antigen 3 isoform 2 [Homo sapiens]	7.50216	0.000465077	0.00069251	0.00055534	0.00092729	0.00095251	0.000781913	10	10.6667	13	16.5	12.5417	0.00010141	8.315e-05	0.00017152	6.082e-05	0.000104225	2	1	2.33333	0.666667	1.5
PPFIBP1	liprin-beta-1 isoform 1 [Homo sapiens]	7.44402	0.000257689	0.00019873	0.00014229	0.00020957	0.00012622	0.000169203	7	6.66667	7.16667	5.33333	6.54167	0	2.273e-05	0	0	2.273e-05	0	0.666667	0	0	0.166667
KIF14	kinesin-like protein KIF14 [Homo sapiens]	7.21352	2.08155e-05	0.00173127	0.00186125	0.00228255	0.00226582	0.00203522	100	143	128	157	132	0.00034227	0.0003326	0.00029403	0.00015966	0.00028214	27	16	16	7	16.5
GPBP1	1 genes:GPBP1. 1 proteins in this group did not match any genes. gi|28875782|ref|NP_075064.1|:GPBP1:vasculin isoform 1 [Homo sapiens] ;gi|530379446|ref|XP_005248631.1|:PREDICTED: vasculin isoform X4 [Homo sapiens] ;gi|578810503|ref|XP_006714736.1|:GPBP1:PREDICTED: vasculin isoform X5 [Homo sapiens] ;gi|578810505|ref|XP_006714737.1|:GPBP1:PREDICTED: vasculin isoform X6 [Homo sapiens] ;	6.98415	0.00227318	0.0003016	0.00040814	0.00024852	0.00055311	0.000377842	5	9	4	11	7.25	4.417e-05	0	6.403e-05	0	5.41e-05	1	0	1	0	0.5
IFT22	rab-like protein 5 isoform a [Homo sapiens]	6.98237	0.00137919	0.0026218	0.0040581	0.00508331	0.00539959	0.0042907	17	35	32	42	31.5	0.00112925	0.00055554	0.0001637	0.00060953	0.000614505	10	3	1	3	4.25
TJP2	tight junction protein ZO-2 isoform 1 [Homo sapiens]	6.92465	1.05839e-05	0.00450987	0.00598435	0.00550714	0.00587602	0.00546934	188.1	332	223	294	259.275	0.00086023	0.00057577	0.00071259	0.00101076	0.000789838	49	20	28	32	32.25
CAPZB	F-actin-capping protein subunit beta isoform 1 [Homo sapiens]	6.90269	0.00129514	0.00146853	0.00260238	0.0017287	0.00271067	0.00212757	14	33	16	31	23.5	0.00057604	0.00012595	0.00022268	0	0.000308223	7.5	1	2	0	2.625
TTC26	tetratricopeptide repeat protein 26 isoform 1 [Homo sapiens]	6.8928	1.19018e-05	0.00133902	0.00147129	0.00137921	0.00167432	0.00146596	26	38	26	39	32.25	0.00030168	0.00012368	0	0	0.00021268	8	2	0	0	2.5
SYNJ1	1 genes:SYNJ1. 5 proteins in this group did not match any genes. gi|237757310|ref|NP_003886.3|:SYNJ1:synaptojanin-1 isoform a [Homo sapiens] ;gi|237757326|ref|NP_001153778.1|:SYNJ1:synaptojanin-1 isoform d [Homo sapiens] ;gi|530419122|ref|XP_005261133.1|:PREDICTED: synaptojanin-1 isoform X2 [Homo sapiens] ;gi|578836711|ref|XP_006724121.1|:PREDICTED: synaptojanin-1 isoform X8 [Homo sapiens] ;gi|57…	6.87421	0.000219239	0.00017699	0.00017298	0.00016408	0.00025082	0.000191218	10	13	9	17	12.25	3.888e-05	2.125e-05	0	2.332e-05	2.78167e-05	3	1	0	1	1.25
TNRC6C	trinucleotide repeat-containing gene 6C protein isoform 1 [Homo sapiens]	6.84936	0.00322828	0.00019836	0.00026098	0.00037458	0.00045924	0.00032329	12	21	22	33.3267	22.0817	8.473e-05	0	3.509e-05	2.178e-05	4.72e-05	7	0	2	1	2.5
PLEKHG1	1 genes:PLEKHG1. 1 proteins in this group did not match any genes. gi|530383894|ref|XP_005267121.1|:PLEKHG1:PREDICTED: pleckstrin homology domain-containing family G member 1 isoform X1 [Homo sapiens] ;gi|578812857|ref|XP_006715583.1|:PREDICTED: pleckstrin homology domain-containing family G member 1 isoform X5 [Homo sapiens] ;gi|578812862|ref|XP_006715585.1|:PLEKHG1:PREDICTED: pleckstrin homolog…	6.79798	0.0214902	7.903e-05	0.00014855	6.106e-05	0.00023059	0.000129807	4	10	3	14	7.75	1.447e-05	2.372e-05	0	0	1.9095e-05	1	1	0	0	0.5
IFT81	intraflagellar transport protein 81 homolog isoform 1 [Homo sapiens]	6.78593	2.08878e-05	0.00198369	0.0023798	0.00273881	0.00242765	0.00238249	47	75	63	69	63.5	0.00052537	0.00025339	0.0004032	0.00022241	0.000351093	17	5	9	4	8.75
BICD2	protein bicaudal D homolog 2 isoform 1 [Homo sapiens]	6.5493	6.73727e-05	0.00742769	0.0113522	0.00948369	0.0091761	0.00935992	222.586	452.502	275.915	329.869	320.218	0.00180813	0.00140238	0.00127515	0.00123094	0.00142915	74	35	36	28	43.25
CTTN	src substrate cortactin isoform a [Homo sapiens]	6.53406	0.00564194	0.00233438	0.00358799	0.00347311	0.0059676	0.00384077	45	92	65	138	85	0.00093061	0.00040487	0.0006057	0.00041005	0.000587808	24.5	6.5	11	6	12
PPFIBP1	liprin-beta-1 isoform 2 [Homo sapiens]	6.48849	0.0115794	4.233e-05	0.00018388	0.00022286	0.00013723	0.000146575	1.5	8.66667	7.66667	5.83333	5.91667	0	2.259e-05	0	0	2.259e-05	0	0.666667	0	0	0.166667
PPFIBP1	liprin-beta-1 isoform 4 [Homo sapiens]	6.32876	0.0100419	4.367e-05	0.00018969	0.00021491	0.00014157	0.00014746	1.5	8.66667	7.16667	5.83333	5.79167	0	2.33e-05	0	0	2.33e-05	0	0.666667	0	0	0.166667
LIMD1	LIM domain-containing protein 1 [Homo sapiens]	6.17318	9.45535e-05	0.00202589	0.00193557	0.00239103	0.00158325	0.00198394	48	61	55	45	52.25	0.00046356	0	0.0001792	0	0.00032138	15	0	4	0	4.75
DNMBP	dynamin-binding protein [Homo sapiens]	6.10816	0.0001921	0.0004704	0.00032644	0.0003168	0.00040721	0.000380213	26	24	17	27	23.5	5.299e-05	0	3.841e-05	9.534e-05	6.22467e-05	4	0	2	4	2.5
SDCCAG3	serologically defined colon cancer antigen 3 isoform 3 [Homo sapiens]	5.9789	0.00713704	0.00078816	0.00063204	0.00105537	0.00036136	0.000709232	10	10.6667	13	5.5	9.79167	0.00011542	9.464e-05	0.00019521	6.922e-05	0.000118622	2	1	2.33333	0.666667	1.5
PDLIM5	PDZ and LIM domain protein 5 isoform a [Homo sapiens]	5.96292	0.0441871	0.00039095	0.00064782	0.00108479	0.00022613	0.000587423	8.16667	18	22	5.66667	13.4583	5.842e-05	0.00022992	8.469e-05	2.102e-05	9.85125e-05	1.66667	4	1.66667	0.333333	1.91667
NCKAP1	1 genes:NCKAP1.gi|45545411|ref|NP_995314.1|:NCKAP1:nck-associated protein 1 isoform 2 [Homo sapiens] ;gi|578803511|ref|XP_006712263.1|:NCKAP1:PREDICTED: nck-associated protein 1 isoform X1 [Homo sapiens] ;gi|578803513|ref|XP_006712264.1|:NCKAP1:PREDICTED: nck-associated protein 1 isoform X2 [Homo sapiens] ;gi|7305303|ref|NP_038464.1|:NCKAP1:nck-associated protein 1 isoform 1 [Homo sapiens] ;	5.88731	4.53272e-05	0.0007548	0.00077553	0.00072563	0.00083894	0.000773725	30	41	28	40	34.75	0.00027634	3.021e-05	5.341e-05	0.00016573	0.000131422	15	1	2	5	5.75
TAB2	PREDICTED: TGF-beta-activated kinase 1 and MAP3K7-binding protein 2 isoform X1 [Homo sapiens]	5.82902	0.00746884	0.0006999	0.00210476	0.00121635	0.00140713	0.00135703	17	68	28.6829	41	38.6707	0.00033161	0.0001483	0.00021851	0	0.000232807	11	3	5	0	4.75
PDLIM3	PDZ and LIM domain protein 3 isoform b [Homo sapiens]	5.8054	0.0013014	0.00054173	0.00027152	0.000465	0.00060212	0.000470092	6	4	5	8	5.75	6.611e-05	0	9.584e-05	0	8.0975e-05	1	0	1	0	0.5
TANK	1 genes:TANK. 4 proteins in this group did not match any genes. gi|312433953|ref|NP_001186064.1|:TANK:TRAF family member-associated NF-kappa-B activator isoform a [Homo sapiens] ;gi|530369619|ref|XP_005246263.1|:PREDICTED: TRAF family member-associated NF-kappa-B activator isoform X1 [Homo sapiens] ;gi|530369621|ref|XP_005246264.1|:PREDICTED: TRAF family member-associated NF-kappa-B activator iso…	5.7074	0.0385426	0.0002014	0.00020188	0.00069148	0.00027981	0.000343642	3	4	10	5	5.5	4.916e-05	0	7.126e-05	0	6.021e-05	1	0	1	0	0.5
SORBS1	PREDICTED: sorbin and SH3 domain-containing protein 1 isoform X68 [Homo sapiens]	5.69552	0.0286881	2.273e-05	0.00012605	7.123e-05	0.00013858	8.96475e-05	0.8	5.9	2.43333	5.85	3.74583	1.873e-05	0	6.03e-06	2.246e-05	1.574e-05	0.9	0	0.2	0.6	0.425
SORBS1	sorbin and SH3 domain-containing protein 1 isoform 2 [Homo sapiens]	5.67767	0.0230116	2.797e-05	0.00014414	9.964e-05	0.00016808	0.000109957	0.8	5.48333	2.76667	5.76667	3.70417	2.304e-05	0	7.42e-06	2.764e-05	1.93667e-05	0.9	0	0.2	0.6	0.425
IPO8	importin-8 isoform 1 [Homo sapiens]	5.66052	4.28058e-06	0.00170583	0.00163408	0.00178538	0.00139868	0.00163099	62	79	63	60.9836	66.2459	0.00034248	0.00026429	0.00029204	0.00025373	0.000288135	17	8	10	7	10.5
PXN	1 genes:PXN. 10 proteins in this group did not match any genes. gi|170932514|ref|NP_001074324.1|:PXN:paxillin isoform 2 [Homo sapiens] ;gi|170932516|ref|NP_002850.2|:PXN:paxillin isoform 1 [Homo sapiens] ;gi|344217711|ref|NP_001230685.1|:PXN:paxillin isoform 3 [Homo sapiens] ;gi|530401367|ref|XP_005253967.1|:PREDICTED: paxillin isoform X1 [Homo sapiens] ;gi|530401375|ref|XP_005253970.1|:PREDICTED…	5.39029	0.000161366	0.00043449	0.00058071	0.00054698	0.00072438	0.00057164	9	16	11	18	13.5	0.00010605	0	0	0	0.00010605	3	0	0	0	0.75
RAPH1	ras-associated and pleckstrin homology domains-containing protein 1 isoform 1 [Homo sapiens]	5.29976	0.0251397	5.706e-05	0.00020592	0.00014106	0.00026638	0.000167605	2.5	12	6	14	8.625	5.85e-05	1.37e-05	2.423e-05	3.007e-05	3.1625e-05	3.5	0.5	1	1	1.5
N4BP2	NEDD4-binding protein 2 [Homo sapiens]	5.28505	4.61934e-06	0.00090269	0.0009089	0.00078036	0.00096748	0.000889857	56	75	47	72	62.5	0.00022426	0.00015484	0.00018821	0.00010618	0.000168373	19	8	11	5	10.75
TAB1	TGF-beta-activated kinase 1 and MAP3K7-binding protein 1 isoform alpha [Homo sapiens]	5.2225	4.35187e-05	0.00356642	0.00510713	0.00472305	0.00443589	0.00445812	63	120	81	94	89.5	0.00082902	0.00108756	0.00090134	0.00059663	0.000853637	20	16	15	8	14.75
TNIK	1 genes:TNIK.gi|239735580|ref|NP_001155032.1|:TNIK:TRAF2 and NCK-interacting protein kinase isoform 2 [Homo sapiens] ;gi|239735582|ref|NP_001155033.1|:TNIK:TRAF2 and NCK-interacting protein kinase isoform 3 [Homo sapiens] ;gi|239735584|ref|NP_001155034.1|:TNIK:TRAF2 and NCK-interacting protein kinase isoform 4 [Homo sapiens] ;gi|239735586|ref|NP_001155035.1|:TNIK:TRAF2 and NCK-interacting protein…	5.22162	0.00902417	0.00010552	7.933e-05	6.521e-05	0.00017592	0.000106495	5	5	3	10	5.75	1.545e-05	2.534e-05	0	0	2.0395e-05	1	1	0	0	0.5
PTPN14	tyrosine-protein phosphatase non-receptor type 14 [Homo sapiens]	5.20162	4.59831e-06	0.00048073	0.00039756	0.0004704	0.00046085	0.000452385	20	22	19	23	21	7.04e-05	8.658e-05	0.00012757	6.333e-05	8.697e-05	4	3	5	2	3.5
EIF4ENIF1	1 genes:EIF4ENIF1. 2 proteins in this group did not match any genes. gi|256818796|ref|NP_001157973.1|:EIF4ENIF1:eukaryotic translation initiation factor 4E transporter isoform a [Homo sapiens] ;gi|530420262|ref|XP_005261745.1|:EIF4ENIF1:PREDICTED: eukaryotic translation initiation factor 4E transporter isoform X3 [Homo sapiens] ;gi|578837305|ref|XP_006724344.1|:PREDICTED: eukaryotic translation i…	5.18751	0.00890195	0.00020276	0.00013066	0.00035802	0.0003139	0.000251335	7	6	12	13	9.5	2.121e-05	3.478e-05	6.149e-05	7.632e-05	4.845e-05	1	1	2	2	1.5
STAT3	signal transducer and activator of transcription 3 isoform 1 [Homo sapiens]	5.16317	0.0158221	0.00114866	0.00095178	0.00131291	0.00030888	0.000930557	31	34.1667	34.4	10	27.3917	0.00032558	0.00011123	0.00013766	0.00014645	0.00018023	12	2.5	3.5	3	5.25
NIN	ninein isoform 2 [Homo sapiens]	5.12017	0.00831586	2.675e-05	8.045e-05	0.00011022	0.0001115	8.223e-05	2	8	8	10	7	0	1.606e-05	0	0	1.606e-05	0	1	0	0	0.25
GIGYF2	1 genes:GIGYF2.gi|156766043|ref|NP_001096616.1|:GIGYF2:PERQ amino acid-rich with GYF domain-containing protein 2 isoform b [Homo sapiens] ;gi|156766047|ref|NP_001096618.1|:GIGYF2:PERQ amino acid-rich with GYF domain-containing protein 2 isoform c [Homo sapiens] ;	5.09932	0.000583671	0.00065892	0.00075958	0.00083707	0.00108025	0.000833955	30	46	37	59	43	0.00028949	0.00018461	9.326e-05	8.681e-05	0.000163542	18	7	4	3	8
EPS8	0 genes:. 2 proteins in this group did not match any genes. gi|530399079|ref|XP_005253396.1|:PREDICTED: epidermal growth factor receptor kinase substrate 8 isoform X1 [Homo sapiens] ;gi|578822816|ref|XP_006719120.1|:PREDICTED: epidermal growth factor receptor kinase substrate 8 isoform X3 [Homo sapiens] ;	4.9775	0.00262383	0.00023976	0.00012875	0.0001764	0.00011421	0.00016478	7	5	5	4	5.25	2.508e-05	4.113e-05	0	0	3.3105e-05	1	1	0	0	0.5
TJP1	PREDICTED: tight junction protein ZO-1 isoform X3 [Homo sapiens]	4.92685	9.12335e-07	0.0016442	0.00180484	0.00186521	0.00193748	0.00181293	102.117	149.1	112.467	144.35	127.008	0.00043071	0.00027711	0.00035891	0.00040515	0.00036797	36.5333	14.3333	21	19.1	22.7417
TJP1	tight junction protein ZO-1 isoform a [Homo sapiens]	4.90685	1.01471e-06	0.00164637	0.00181122	0.0018572	0.00195387	0.00181716	100.867	147.6	110.467	143.6	125.633	0.00043663	0.00028091	0.00036383	0.00039996	0.000370332	36.5333	14.3333	21	18.6	22.6167
TJP1	PREDICTED: tight junction protein ZO-1 isoform X5 [Homo sapiens]	4.84878	1.693e-06	0.00158426	0.00181011	0.00183025	0.00190881	0.00178336	97.45	148.1	109.3	140.85	123.925	0.00040711	0.00027328	0.00037101	0.00041978	0.000367795	34.2	14	21.5	19.6	22.325
CAPZA1	F-actin-capping protein subunit alpha-1 [Homo sapiens]	4.8463	0.00253596	0.00255936	0.00173249	0.00192151	0.00312359	0.00233424	25.6552	23.1	18.7	37.561	26.254	0.00106109	0	0.00012102	0.00026285	0.000481653	14.5263	0	1.14286	2	4.41729
XRN1	5'-3' exoribonuclease 1 isoform c [Homo sapiens]	4.80416	0.00941112	0.00092634	0.00043052	0.00047881	0.00095473	0.0006976	55	34	27.6	68	46.15	0.00026515	9.1e-05	8.045e-05	0.00014423	0.000145207	21.5	4.5	4.5	6.5	9.25
CALD1	1 genes:CALD1. 1 proteins in this group did not match any genes. gi|15149463|ref|NP_149130.1|:CALD1:caldesmon isoform 4 [Homo sapiens] ;gi|15149465|ref|NP_149131.1|:CALD1:caldesmon isoform 5 [Homo sapiens] ;gi|578814641|ref|XP_006716200.1|:PREDICTED: caldesmon isoform X2 [Homo sapiens] ;	4.79512	0.0437003	0.00010226	0.00099946	0.000632	0.00080985	0.000635893	2	26	12	19	14.75	0.00022464	0.00018418	5.427e-05	6.736e-05	0.000132612	6	3	1	1	2.75
HAUS4	HAUS augmin-like complex subunit 4 isoform 1 [Homo sapiens]	4.7937	0.0133146	0.00039299	5.909e-05	0.00032383	0.0003276	0.000275878	5	1	4	5	3.75	5.755e-05	0	0	0	5.755e-05	1	0	0	0	0.25
SH3PXD2B	SH3 and PX domain-containing protein 2B [Homo sapiens]	4.7295	0.00242027	6.264e-05	0.00011773	9.678e-05	0.00015664	0.000108447	2	5	3	6	4	2.293e-05	0	0	0	2.293e-05	1	0	0	0	0.25
KRT19	keratin, type I cytoskeletal 19 [Homo sapiens]	4.71665	0.046473	0.00028531	0.00213353	0.00165307	0.00237839	0.00161257	4	39.7863	22.5	40	26.5716	0.00014798	0.00012847	0.00015142	0.00093969	0.00034189	2.83333	1.5	2	10	4.08333
SMG7	1 genes:SMG7. 5 proteins in this group did not match any genes. gi|42475558|ref|NP_775179.1|:SMG7:protein SMG7 isoform 1 [Homo sapiens] ;gi|42476070|ref|NP_963862.1|:SMG7:protein SMG7 isoform 2 [Homo sapiens] ;gi|530365711|ref|XP_005245704.1|:PREDICTED: protein SMG7 isoform X1 [Homo sapiens] ;gi|530365715|ref|XP_005245706.1|:SMG7:PREDICTED: protein SMG7 isoform X3 [Homo sapiens] ;gi|530365721|ref…	4.60645	0.00154165	0.00045168	0.00032071	0.00025847	0.00029285	0.000330928	18	17	10	14	14.75	0.00012862	6.026e-05	2.664e-05	0	7.184e-05	7	2	1	0	2.5
HERC2	1 genes:HERC2. 1 proteins in this group did not match any genes. gi|126032348|ref|NP_004658.3|:HERC2:E3 ubiquitin-protein ligase HERC2 [Homo sapiens] ;gi|530405222|ref|XP_005268334.1|:PREDICTED: E3 ubiquitin-protein ligase HERC2 isoform X3 [Homo sapiens] ;	4.58467	0.00256502	0.00011804	6.656e-05	6.079e-05	0.00010332	8.71775e-05	20	15	10	21	16.5	3.025e-05	0	0	7.78e-06	1.9015e-05	7	0	0	1	2
GSK3A	glycogen synthase kinase-3 alpha [Homo sapiens]	4.55529	0.000124482	0.00091405	0.00079303	0.00064647	0.00093013	0.00082092	15.4737	17.8571	10.625	18.8889	15.7112	8.651e-05	0.00021278	0.0001881	0.00023346	0.000180212	2	3	3	3	2.75
TNRC6B	trinucleotide repeat-containing gene 6B protein isoform 2 [Homo sapiens]	4.524	0.00668851	0.00059613	0.00105818	0.00156917	0.00102148	0.00106124	36	85	92	74	71.75	0.00032737	0.00019883	0.00028123	0.00013089	0.00023458	27	10	16	6	14.75
TNRC6A	PREDICTED: trinucleotide repeat-containing gene 6A protein isoform X2 [Homo sapiens]	4.39414	0.000771071	0.00049218	0.00074004	0.00089101	0.0008538	0.000744258	33	66	58	68.6733	56.4183	0.00017473	0.00017908	0.0002058	0.00011789	0.000169375	16	10	13	6	11.25
ABL2	Abelson tyrosine-protein kinase 2 isoform f [Homo sapiens]	4.36012	0.0325438	0.00022117	5.851e-05	0.00010125	8.194e-05	0.000115717	9	3.16667	4	4	5.04167	2.699e-05	0	2.609e-05	0	2.654e-05	1.5	0	1	0	0.625
LUZP1	leucine zipper protein 1 [Homo sapiens]	4.3458	0.00081239	0.00090155	0.00117616	0.00161142	0.00141466	0.00127595	34	59	59	64	54	0.0002524	0.00031838	0.00039404	0.0002096	0.000293605	13	10	14	6	10.75
TES	testin isoform 1 [Homo sapiens]	4.33649	0.000978443	0.00060993	0.0004076	0.00069805	0.00073442	0.0006125	9	8	10	13	10	0.00019849	8.137e-05	0.00014387	0	0.000141243	4	1	2	0	1.75
IST1	1 genes:IST1.gi|401709930|ref|NP_001257904.1|:IST1:IST1 homolog isoform a [Homo sapiens] ;gi|401709932|ref|NP_001257905.1|:IST1:IST1 homolog isoform c [Homo sapiens] ;	4.30522	0.0100364	0.00109136	0.00046885	0.00056206	0.00090977	0.00075801	14	8	7	14	10.75	0.00034248	9.36e-05	0.00016549	0.0001027	0.000176067	6	1	2	1	2.5
CSNK1E	casein kinase I isoform epsilon [Homo sapiens]	4.20687	0.00839416	0.00013717	0.00020625	0.00021193	5.717e-05	0.00015313	2	4	3	1	2.5	0	0	3.64e-05	0	3.64e-05	0	0	0.5	0	0.125
ARFGAP1	PREDICTED: ADP-ribosylation factor GTPase-activating protein 1 isoform X1 [Homo sapiens]	4.20232	0.000958157	0.00261302	0.00392895	0.00341889	0.00294355	0.0032261	37	74	47	50	52	0.00155133	0.00050878	0.00082459	0.00018608	0.000767695	30	6	11	2	12.25
SPC24	kinetochore protein Spc24 [Homo sapiens]	4.146	0.0166006	0.00057932	0.00108883	0.00164095	0.00060365	0.000978188	4	10	11	5	7.5	0.00031814	0	0.00015373	0	0.000235935	3	0	1	0	1
TAB3	PREDICTED: TGF-beta-activated kinase 1 and MAP3K7-binding protein 3 isoform X1 [Homo sapiens]	4.1232	0.000485293	0.00036065	0.00039164	0.00054966	0.00036745	0.00041735	9	13	13.3171	11	11.5793	0.00011737	0	8.507e-05	0	0.00010122	4	0	2	0	1.5
MLXIP	1 genes:MLXIP.gi|111955326|ref|NP_055753.3|:MLXIP:MLX-interacting protein [Homo sapiens] ;gi|578823443|ref|XP_006719355.1|:MLXIP:PREDICTED: MLX-interacting protein isoform X3 [Homo sapiens] ;	4.07859	0.000145045	0.00034151	0.00025675	0.00025582	0.00036232	0.0003041	11	11	8	14	11	0	7.456e-05	0	0	7.456e-05	0	2	0	0	0.5
KIAA1671	PREDICTED: uncharacterized protein KIAA1671 isoform X3 [Homo sapiens]	4.03791	9.91038e-05	0.00116906	0.00140149	0.00157842	0.00152765	0.00141916	74	118	97	116	101.25	0.00031233	0.00017072	0.00040246	0.00052032	0.000351457	27	9	24	25	21.25
DBNL	1 genes:DBNL.gi|21361670|ref|NP_054782.2|:DBNL:drebrin-like protein isoform a [Homo sapiens] ;gi|62198235|ref|NP_001014436.1|:DBNL:drebrin-like protein isoform b [Homo sapiens] ;	3.92475	0.000304542	0.00125776	0.00129396	0.00129552	0.00165549	0.00137568	19	26	19	30	23.5	0.00063013	0.00015897	0.00035133	0.00026163	0.000350515	13	2	5	3	5.75
GPATCH1	G patch domain-containing protein 1 [Homo sapiens]	3.87787	0.000391414	0.00082744	0.00126718	0.00119951	0.00094523	0.00105984	27	55	38	37	39.25	0.00017952	0.00025758	0.00029276	0.00036336	0.000273305	8	7	9	9	8.25
ARHGAP29	1 genes:ARHGAP29.gi|134304853|ref|NP_004806.3|:ARHGAP29:rho GTPase-activating protein 29 [Homo sapiens] ;gi|578800119|ref|XP_006711111.1|:ARHGAP29:PREDICTED: rho GTPase-activating protein 29 isoform X1 [Homo sapiens] ;	3.84257	0.0351221	0.00015838	3.402e-05	0.00020975	9.431e-05	0.000124115	7	2	9	5	5.75	1.657e-05	0	4.803e-05	0	3.23e-05	1	0	2	0	0.75
BCCIP	BRCA2 and CDKN1A-interacting protein isoform BCCIPalpha [Homo sapiens]	3.83874	0.0322572	0.00274681	0.00113245	0.00100393	0.00107101	0.00148855	31	17	11	14.5	18.375	0	0.00042557	0.00032918	0.00040856	0.00038777	0	4	3.5	3.5	2.75
CKB	creatine kinase B-type [Homo sapiens]	3.80794	0.00471188	0.00112328	0.00061929	0.00123414	0.00131092	0.00107191	15	11	16	21	15.75	0.0001645	8.992e-05	0.00047693	0.00039462	0.000281493	3	1	6	4	3.5
IRAK1	interleukin-1 receptor-associated kinase 1 isoform 1 [Homo sapiens]	3.79998	0.00487985	0.00076137	0.00090379	0.00144463	0.00146979	0.00114489	19	30	35	44	32	8.802e-05	0.00043304	0.00038281	0	0.00030129	3	9	9	0	5.25
NFATC3	1 genes:NFATC3.gi|27886555|ref|NP_775186.1|:NFATC3:nuclear factor of activated T-cells, cytoplasmic 3 isoform 3 [Homo sapiens] ;gi|27886561|ref|NP_775188.1|:NFATC3:nuclear factor of activated T-cells, cytoplasmic 3 isoform 1 [Homo sapiens] ;gi|4758804|ref|NP_004546.1|:NFATC3:nuclear factor of activated T-cells, cytoplasmic 3 isoform 2 [Homo sapiens] ;	3.79481	0.00120719	0.00024111	0.00018127	0.00016557	0.00029032	0.000219568	9	9	6	13	9.25	5.885e-05	0	5.687e-05	0	5.786e-05	3	0	2	0	1.25
PPM1A	1 genes:PPM1A. 1 proteins in this group did not match any genes. gi|193211600|ref|NP_808821.2|:PPM1A:protein phosphatase 1A isoform 3 [Homo sapiens] ;gi|29557855|ref|NP_808820.1|:PPM1A:protein phosphatase 1A isoform 2 [Homo sapiens] ;gi|578825910|ref|XP_006720243.1|:PREDICTED: protein phosphatase 1A isoform X7 [Homo sapiens] ;	3.73411	0.0120666	0.00031353	0.00018857	0.00038753	0.00010454	0.000248542	5	4	6	2	4.25	0	0	6.656e-05	0	6.656e-05	0	0	1	0	0.25
CRKL	crk-like protein [Homo sapiens]	3.71262	0.00017822	0.00235407	0.001699	0.00193979	0.00180538	0.00194956	25	24	20	23	23	0.00068948	0.00033919	0.00069965	0.00037215	0.000525118	10	3	7	3	5.75
SASS6	spindle assembly abnormal protein 6 homolog [Homo sapiens]	3.70617	0.00163949	0.00047769	0.00039178	0.00031311	0.00028961	0.000368047	11	12	7	8	9.5	9.539e-05	0.00015643	4.61e-05	0	9.93067e-05	3	3	1	0	1.75
WASF2	wiskott-Aldrich syndrome protein family member 2 isoform 1 [Homo sapiens]	3.62913	0.000286244	0.00074479	0.00086144	0.00084977	0.00062087	0.000769217	13	20	14.4	13	15.1	0.00020975	0.00027517	0	0.00015095	0.000211957	5	4	0	2	2.75
TTC30A	tetratricopeptide repeat protein 30A [Homo sapiens]	3.58371	0.0344916	0.00030033	0.00048383	0.0005745	0.0009299	0.00057214	7	15	13	26	15.25	0.00037698	0.00010303	4.554e-05	0.00011305	0.00015965	12	2	1	2	4.25
AAK1	AP2-associated protein kinase 1 [Homo sapiens]	3.57314	0.00161123	0.00023751	0.0002232	0.00030581	0.00034649	0.000278252	8	10	10	14	10.5	2.174e-05	0	9.454e-05	0.00011734	7.78733e-05	1	0	3	3	1.75
CARMIL1	1 genes:CARMIL1.gi|291190781|ref|NP_060110.4|:CARMIL1:leucine-rich repeat-containing protein 16A isoform 1 [Homo sapiens] ;gi|291190783|ref|NP_001167448.1|:CARMIL1:leucine-rich repeat-containing protein 16A isoform 2 [Homo sapiens] ;gi|530382226|ref|XP_005249275.1|:CARMIL1:PREDICTED: leucine-rich repeat-containing protein 16A isoform X1 [Homo sapiens] ;	3.56122	0.0111926	0.00033297	0.0001721	0.00034297	0.00015613	0.000251042	16	11	16	9	13	0.00010667	4.998e-05	0	5.483e-05	7.04933e-05	7	2	0	2	2.75
IFT27	1 genes:IFT27.gi|578836866|ref|XP_006724169.1|:IFT27:PREDICTED: intraflagellar transport protein 27 homolog isoform X1 [Homo sapiens] ;gi|6857824|ref|NP_006851.1|:IFT27:intraflagellar transport protein 27 homolog isoform 2 [Homo sapiens] ;	3.54483	0.00112226	0.00214752	0.00172983	0.00189599	0.00204593	0.00195482	14	15	12	16	14.25	0.00112318	0.00036837	0.00016282	0	0.000551457	10	2	1	0	3.25
RASSF8	PREDICTED: ras association domain-containing protein 8 isoform X2 [Homo sapiens]	3.54203	0.010886	0.00013619	0.00030716	0.00042083	0.00022705	0.000272807	2	6	6	4	4.5	0	8.176e-05	7.228e-05	0	7.702e-05	0	1	1	0	0.5
SNX9	sorting nexin-9 [Homo sapiens]	3.52316	4.70246e-05	0.00244554	0.00252352	0.00207444	0.00227846	0.00233049	51	70	42	57	55	0.00101823	0.00046061	0.00066169	0.00050538	0.000661478	29	8	13	8	14.5
CORO1B	coronin-1B [Homo sapiens]	3.47866	0.00633399	0.00035008	0.00026319	0.0001202	0.00029183	0.000256325	6	6	2	6	5	8.544e-05	0	6.193e-05	0	7.3685e-05	2	0	1	0	0.75
POLR2B	DNA-directed RNA polymerase II subunit RPB2 [Homo sapiens]	3.4784	0.0462268	4.861e-05	7.308e-05	0.00015019	0.00018233	0.000113553	2	4	6	9	5.25	1.779e-05	2.918e-05	5.159e-05	3.202e-05	3.2645e-05	1	1	2	1	1.25
SEC24B	1 genes:SEC24B. 1 proteins in this group did not match any genes. gi|112382212|ref|NP_006314.2|:SEC24B:protein transport protein Sec24B isoform a [Homo sapiens] ;gi|112382214|ref|NP_001036199.1|:SEC24B:protein transport protein Sec24B isoform b [Homo sapiens] ;gi|530377065|ref|XP_005262745.1|:SEC24B:PREDICTED: protein transport protein Sec24B isoform X1 [Homo sapiens] ;gi|530377067|ref|XP_0052627…	3.47142	0.00180897	9e-05	0.00011841	9.271e-05	0.00015006	0.000112795	4	7	4	8	5.75	4.943e-05	2.702e-05	2.388e-05	2.964e-05	3.24925e-05	3	1	1	1	1.5
PTPN23	1 genes:PTPN23. 1 proteins in this group did not match any genes. gi|24308073|ref|NP_056281.1|:PTPN23:tyrosine-protein phosphatase non-receptor type 23 [Homo sapiens] ;gi|530372233|ref|XP_005265088.1|:PREDICTED: tyrosine-protein phosphatase non-receptor type 23 isoform X1 [Homo sapiens] ;	3.44655	0.0191546	0.00038367	0.00031467	0.00017963	0.00014538	0.000255838	22	24	10	10	16.5	0.0001277	2.094e-05	7.405e-05	0	7.423e-05	10	1	4	0	3.75
CNKSR3	connector enhancer of kinase suppressor of ras 3 [Homo sapiens]	3.44208	0.0467057	0.00015422	0	0.0001059	0.00012856	0.00012956	3	0	2	3	2	3.764e-05	0	0	0	3.764e-05	1	0	0	0	0.25
HAUS5	HAUS augmin-like complex subunit 5 [Homo sapiens]	3.37841	0.000107799	0.00063102	0.00054218	0.00051069	0.0005636	0.000561872	14	16	11	15	14	0.00019802	0.00021648	0.00019137	5.938e-05	0.000166313	6	4	4	1	3.75
DOCK4	1 genes:DOCK4.gi|578814791|ref|XP_006716251.1|:DOCK4:PREDICTED: dedicator of cytokinesis protein 4 isoform X1 [Homo sapiens] ;gi|578814793|ref|XP_006716252.1|:DOCK4:PREDICTED: dedicator of cytokinesis protein 4 isoform X2 [Homo sapiens] ;gi|92091572|ref|NP_055520.3|:DOCK4:dedicator of cytokinesis protein 4 [Homo sapiens] ;	3.37131	0.0369198	0.00015891	9.775e-05	4.464e-05	4.817e-05	8.73675e-05	11	9	3	4	6.75	2.116e-05	0	3.067e-05	0	2.5915e-05	2	0	2	0	1
SH3GL1	endophilin-A2 isoform 1 [Homo sapiens]	3.33918	0.00316164	0.00131802	0.00073276	0.00119788	0.00084019	0.00102221	17	12.5714	15	13	14.3929	0.00042577	0.00018619	0	0.00030642	0.000306127	7.5	2	0	3	3.125
IFT46	intraflagellar transport protein 46 homolog isoform 1 [Homo sapiens]	3.30668	0.00645569	0.00216999	0.0021752	0.00372522	0.00200991	0.00252008	27	36	45	30	34.5	0.00111812	0.00086852	0.00042655	0.00063528	0.000762118	19	9	5	6	9.75
ARFIP2	1 genes:ARFIP2.gi|338827746|ref|NP_001229783.1|:ARFIP2:arfaptin-2 isoform 1 [Homo sapiens] ;gi|338827748|ref|NP_001229784.1|:ARFIP2:arfaptin-2 isoform 3 [Homo sapiens] ;gi|530395177|ref|XP_005252897.1|:ARFIP2:PREDICTED: arfaptin-2 isoform X1 [Homo sapiens] ;	3.28018	0.00178406	0.00083916	0.00057353	0.00062862	0.00057234	0.000653413	11	10	8	9	9.5	0.00033515	0	0.00016195	0.0001005	0.0001992	6	0	2	1	2.25
VCPIP1	deubiquitinating protein VCIP135 [Homo sapiens]	3.26427	0.00585373	0.00056035	0.00054415	0.00048098	0.00025302	0.000459625	24	31	20	13	22	0.00018805	0.00014017	0.00017348	6.152e-05	0.000140805	11	5	7	2	6.25
PCM1	PREDICTED: pericentriolar material 1 protein isoform X21 [Homo sapiens]	3.24834	0.00249203	5.355e-05	7.203e-05	9.868e-05	7.41e-05	7.459e-05	4	7.15584	7.15584	6.63961	6.23782	1.337e-05	2.505e-05	3.488e-05	1.855e-05	2.29625e-05	1.36364	1.55844	2.45455	1.05195	1.60714
PCM1	PREDICTED: pericentriolar material 1 protein isoform X22 [Homo sapiens]	3.24805	0.00249354	5.368e-05	7.22e-05	9.892e-05	7.428e-05	7.477e-05	4	7.15584	7.15584	6.63961	6.23782	1.34e-05	2.511e-05	3.497e-05	1.86e-05	2.302e-05	1.36364	1.55844	2.45455	1.05195	1.60714
PCM1	pericentriolar material 1 protein [Homo sapiens]	3.2477	0.00249146	5.639e-05	7.584e-05	0.0001039	7.802e-05	7.85375e-05	4	7.15584	7.15584	6.63961	6.23782	1.408e-05	2.638e-05	3.673e-05	1.954e-05	2.41825e-05	1.36364	1.55844	2.45455	1.05195	1.60714
FHL1	1 genes:FHL1.gi|228480205|ref|NP_001153171.1|:FHL1:four and a half LIM domains protein 1 isoform 5 [Homo sapiens] ;gi|228480209|ref|NP_001153173.1|:FHL1:four and a half LIM domains protein 1 isoform 3 precursor [Homo sapiens] ;gi|578838653|ref|XP_006724810.1|:FHL1:PREDICTED: four and a half LIM domains protein 1 isoform X5 [Homo sapiens] ;	3.23966	0.0278394	0.0009639	0.00188412	0.00198567	0.00160702	0.00161018	10	26	20	20	19	0.00141157	0.00034721	0.00010231	0.00012699	0.00049702	20	3	1	1	6.25
PCM1	PREDICTED: pericentriolar material 1 protein isoform X18 [Homo sapiens]	3.21761	0.00271025	5.318e-05	7.152e-05	9.799e-05	7.082e-05	7.33775e-05	4	7.15584	7.15584	6.38961	6.17532	1.327e-05	2.488e-05	3.464e-05	1.843e-05	2.2805e-05	1.36364	1.55844	2.45455	1.05195	1.60714
PCM1	PREDICTED: pericentriolar material 1 protein isoform X25 [Homo sapiens]	3.21751	0.00271078	5.508e-05	7.408e-05	0.00010149	7.334e-05	7.59975e-05	4	7.15584	7.15584	6.38961	6.17532	1.375e-05	2.577e-05	3.588e-05	1.908e-05	2.362e-05	1.36364	1.55844	2.45455	1.05195	1.60714
PCM1	PREDICTED: pericentriolar material 1 protein isoform X24 [Homo sapiens]	3.2175	0.00271256	5.497e-05	7.394e-05	0.0001013	7.32e-05	7.58525e-05	4	7.15584	7.15584	6.38961	6.17532	1.372e-05	2.572e-05	3.581e-05	1.905e-05	2.3575e-05	1.36364	1.55844	2.45455	1.05195	1.60714
ITSN2	intersectin-2 isoform 1 [Homo sapiens]	3.19197	0.027495	0.00015132	0.00015168	8.659e-05	4.205e-05	0.00010791	9	12	5	3	7.25	3.693e-05	2.019e-05	0	4.43e-05	3.38067e-05	3	1	0	2	1.5
BTF3L4	transcription factor BTF3 homolog 4 isoform 1 [Homo sapiens]	3.18916	0.00890628	0.00108347	0.00040728	0.000744	0.00105372	0.000822117	6	3	4	7	5	0.00013222	0	0.00038335	0	0.000257785	1	0	2	0	0.75
CNN3	calponin-3 isoform 1 [Homo sapiens]	3.18135	0.0123376	0.00225476	0.00273829	0.0025011	0.00375916	0.00281333	26	42	28	52	37	0.00209547	0.00093715	0.00027615	0.0002285	0.000884317	33	9	3	2	11.75
WDR83	WD repeat domain-containing protein 83 [Homo sapiens]	3.15903	0.00895041	0.00054345	0.00095333	0.00121283	0.00098156	0.000922793	6	14	13	13	11.5	0.00053057	0.00032627	0.00019228	0.00011933	0.000292112	8	3	2	1	3.5
UNK	1 genes:UNK. 2 proteins in this group did not match any genes. gi|331028525|ref|NP_001073888.2|:UNK:RING finger protein unkempt homolog [Homo sapiens] ;gi|578831550|ref|XP_006722207.1|:PREDICTED: RING finger protein unkempt homolog isoform X1 [Homo sapiens] ;gi|578831552|ref|XP_006722208.1|:UNK:PREDICTED: RING finger protein unkempt homolog isoform X2 [Homo sapiens] ;gi|578831554|ref|XP_006722209…	3.15633	0.00361313	0.00017612	0.00010593	7.256e-05	0.00011745	0.000118015	5	4	2	4	3.75	0	0	3.739e-05	0	3.739e-05	0	0	1	0	0.25
PCM1	PREDICTED: pericentriolar material 1 protein isoform X26 [Homo sapiens]	3.131	0.00283215	5.529e-05	7.251e-05	9.934e-05	7.281e-05	7.49875e-05	4	6.97727	6.97727	6.31818	6.06818	1.38e-05	2.942e-05	3.602e-05	1.656e-05	2.395e-05	1.36364	1.77273	2.45455	0.909091	1.625
TTC28	1 genes:TTC28.gi|224028289|ref|NP_001138890.1|:TTC28:tetratricopeptide repeat protein 28 [Homo sapiens] ;gi|530419672|ref|XP_005261462.1|:TTC28:PREDICTED: tetratricopeptide repeat protein 28 isoform X1 [Homo sapiens] ;gi|578837019|ref|XP_006724234.1|:TTC28:PREDICTED: tetratricopeptide repeat protein 28 isoform X2 [Homo sapiens] ;	3.10931	0.000832267	0.0001495	0.00021614	0.0002369	0.00020131	0.000200962	13	25	20	21	19.75	7.578e-05	5.523e-05	3.662e-05	9.09e-05	6.46325e-05	9	4	3	6	5.5
WASL	neural Wiskott-Aldrich syndrome protein [Homo sapiens]	3.08215	0.00827765	0.00073447	0.00042475	0.00040736	0.00056516	0.000532935	13	10	7	12	10.5	0.00033095	6.784e-05	0.00011994	0	0.00017291	8	1	2	0	2.75
CEP170B	centrosomal protein of 170 kDa protein B isoform 2 [Homo sapiens]	3.06144	0.00587847	5.635e-05	7.061e-05	7.739e-05	3.132e-05	5.89175e-05	3	5	4	2	3.5	1.375e-05	0	0	2.474e-05	1.9245e-05	1	0	0	1	0.5
CLINT1	clathrin interactor 1 isoform 1 [Homo sapiens]	3.05309	0.00274577	0.00084307	0.00116757	0.00150824	0.00110967	0.00115714	19	35	33	30	29.25	0.00048735	0.00015984	0.00051809	0.00035074	0.000379005	15	3	11	6	8.75
TRIM25	E3 ubiquitin/ISG15 ligase TRIM25 [Homo sapiens]	3.04648	0.000719015	0.00099633	0.00146404	0.00130613	0.00151009	0.00131915	22	43	28	40	33.25	0.00066321	0.00032627	0.00038457	0.00035798	0.000433007	20	6	8	6	10
RPS6KB1	1 genes:RPS6KB1.gi|440546395|ref|NP_001258971.1|:RPS6KB1:ribosomal protein S6 kinase beta-1 isoform b [Homo sapiens] ;gi|440546397|ref|NP_001258972.1|:RPS6KB1:ribosomal protein S6 kinase beta-1 isoform c [Homo sapiens] ;gi|440546399|ref|NP_001258973.1|:RPS6KB1:ribosomal protein S6 kinase beta-1 isoform d [Homo sapiens] ;gi|440546416|ref|NP_001258989.1|:RPS6KB1:ribosomal protein S6 kinase beta-1 i…	3.04229	0.0100113	0.00039785	0.00021364	0.00011708	0.00028427	0.00025321	7	5	2	6	5	8.323e-05	0	0	0	8.323e-05	2	0	0	0	0.5
SIPA1L2	0 genes:. 2 proteins in this group did not match any genes. gi|578802285|ref|XP_006711861.1|:PREDICTED: signal-induced proliferation-associated 1-like protein 2 isoform X7 [Homo sapiens] ;gi|578802290|ref|XP_006711862.1|:PREDICTED: signal-induced proliferation-associated 1-like protein 2 isoform X8 [Homo sapiens] ;	3.02684	0.00121381	0.00013255	0.00011211	0.00020479	0.00013812	0.000146893	8	9	12	10	9.75	4.853e-05	0	0	0	4.853e-05	4	0	0	0	1

## Sheet: CT BICD2
				BICD2-BioID										BioID control
				distributed normalized spectral abundance factor (dNSAF)					distributed Spectral Counts					distributed normalized spectral abundance factor (dNSAF)					distributed Spectral Counts
NCBI_Gene	Description	enrichment ratio	p-value	dNSAF 1	dNSAF 2	dNSAF 3	dNSAF 4	avg dNSAF	dSC 1	dSC 2	dSC 3	dSC 4	avg dSCs	dNSAF 1	dNSAF 2	dNSAF 3	dNSAF 4	avg dNSAF	dSC 1	dSC 2	dSC 3	dSC 4	avg dSCs
ARFGAP3	ADP-ribosylation factor GTPase-activating protein 3 isoform 1 [Homo sapiens]	∞	0.0180301	0.00024088	0.0003491	6.755e-05	0.00013648	0.000198502	3	6	1	2	3	0	0	0	0	0	0	0	0	0	0
ARHGAP1	rho GTPase-activating protein 1 [Homo sapiens]	∞	0.000149209	0.00037751	0.00020517	0.00031758	0.00032084	0.000305275	4	3	4	4	3.75	0	0	0	0	0	0	0	0	0	0
ARHGAP12	1 genes:ARHGAP12. 2 proteins in this group did not match any genes. gi|398303807|ref|NP_001257624.1|:ARHGAP12:rho GTPase-activating protein 12 isoform 2 [Homo sapiens] ;gi|398303812|ref|NP_001257626.1|:ARHGAP12:rho GTPase-activating protein 12 isoform 4 [Homo sapiens] ;gi|530392550|ref|XP_005252701.1|:ARHGAP12:PREDICTED: rho GTPase-activating protein 12 isoform X1 [Homo sapiens] ;gi|578818657|ref…	∞	0.000787101	0.0001478	7.14e-05	0.00016578	0.00012561	0.000127648	3	2	4	3	3	0	0	0	0	0	0	0	0	0	0
ATG13	1 genes:ATG13.gi|326806954|ref|NP_001192049.1|:ATG13:autophagy-related protein 13 isoform 1 [Homo sapiens] ;gi|326806956|ref|NP_001192050.1|:ATG13:autophagy-related protein 13 isoform 2 [Homo sapiens] ;gi|326806958|ref|NP_001192051.1|:ATG13:autophagy-related protein 13 isoform 4 [Homo sapiens] ;gi|578820989|ref|XP_006718459.1|:ATG13:PREDICTED: autophagy-related protein 13 isoform X10 [Homo sapien…	∞	0.0448452	0	0.00011614	0.00026967	0.00020432	0.00019671	0	2	4	3	2.25	0	0	0	0	0	0	0	0	0	0
BICD1	protein bicaudal D homolog 1 isoform 2 [Homo sapiens]	∞	0.0369731	0	0.00019775	0.00020871	0.00033736	0.00024794	0	5.5	5	8	4.625	0	0	0	0	0	0	0	0	0	0
BICD1	protein bicaudal D homolog 1 isoform 1 [Homo sapiens]	∞	0.000516439	0.00029858	0.00016936	0.00017874	0.00028892	0.0002339	7.02625	5.5	5	8	6.38156	0	0	0	0	0	0	0	0	0	0
BORA	1 genes:BORA.gi|557947952|ref|NP_001273675.1|:BORA:protein aurora borealis isoform 2 [Homo sapiens] ;gi|557948045|ref|NP_079084.3|:BORA:protein aurora borealis isoform 1 [Homo sapiens] ;	∞	0.0313019	0.00045745	0.00023677	0.00010995	0.00011108	0.000228813	7	5	2	2	4	0	0	0	0	0	0	0	0	0	0
C17orf53	1 genes:C17orf53. 1 proteins in this group did not match any genes. gi|284005249|ref|NP_001164722.1|:C17orf53:uncharacterized protein C17orf53 isoform 2 [Homo sapiens] ;gi|31543179|ref|NP_076937.2|:C17orf53:uncharacterized protein C17orf53 isoform 1 [Homo sapiens] ;gi|578831380|ref|XP_006722136.1|:PREDICTED: uncharacterized protein C17orf53 isoform X1 [Homo sapiens] ;	∞	0.0448443	0	9.295e-05	0.00021582	0.00016352	0.00015743	0	2	4	3	2.25	0	0	0	0	0	0	0	0	0	0
C20orf27	1 genes:C20orf27.gi|385862238|ref|NP_001245359.1|:C20orf27:UPF0687 protein C20orf27 isoform 2 [Homo sapiens] ;gi|85362737|ref|NP_001034229.1|:C20orf27:UPF0687 protein C20orf27 isoform 1 [Homo sapiens] ;	∞	0.00786565	0.00047623	0.00103526	0.00120189	0.00040473	0.000779527	2	6	6	2	4	0	0	0	0	0	0	0	0	0	0
C2CD3	1 genes:C2CD3. 1 proteins in this group did not match any genes. gi|530396566|ref|XP_005273950.1|:PREDICTED: C2 domain-containing protein 3 isoform X1 [Homo sapiens] ;gi|557440801|ref|NP_001273506.1|:C2CD3:C2 domain-containing protein 3 isoform 1 [Homo sapiens] ;	∞	0.0171031	3.52e-05	3.826e-05	1.481e-05	7.479e-05	4.0765e-05	2	3	1	5	2.75	0	0	0	0	0	0	0	0	0	0
CASP9	1 genes:CASP9.gi|14790124|ref|NP_001220.2|:CASP9:caspase-9 isoform alpha precursor [Homo sapiens] ;gi|493798717|ref|NP_001264983.1|:CASP9:caspase-9 isoform beta [Homo sapiens] ;	∞	0.0091203	0.00019919	0.00043302	0.00016757	0.00016929	0.000242268	2	6	2	2	3	0	0	0	0	0	0	0	0	0	0
CEP41	centrosomal protein of 41 kDa isoform 1 [Homo sapiens]	∞	0.0477923	0.00022216	0.00096587	0.00028033	0.0002832	0.00043789	2	12	3	3	5	0	0	0	0	0	0	0	0	0	0
CUL3	1 genes:CUL3. 1 proteins in this group did not match any genes. gi|380714663|ref|NP_001244126.1|:CUL3:cullin-3 isoform 2 [Homo sapiens] ;gi|380714665|ref|NP_001244127.1|:CUL3:cullin-3 isoform 3 [Homo sapiens] ;gi|4503165|ref|NP_003581.1|:CUL3:cullin-3 isoform 1 [Homo sapiens] ;gi|578805029|ref|XP_006712863.1|:PREDICTED: cullin-3 isoform X1 [Homo sapiens] ;	∞	2.43639e-05	0.00011804	0.0001283	9.93e-05	0.00015048	0.00012403	2	3	2	3	2.5	0	0	0	0	0	0	0	0	0	0
DPH5	diphthine synthase isoform a [Homo sapiens]	∞	0.00831706	0.00072688	0.00031603	0.0002446	0.00037065	0.00041454	5	3	2	3	3.25	0	0	0	0	0	0	0	0	0	0
DPYSL4	dihydropyrimidinase-related protein 4 [Homo sapiens]	∞	0.0216699	0.00036217	5.249e-05	0.00024374	0.00049247	0.000287718	5	1	4	8	4.5	0	0	0	0	0	0	0	0	0	0
ERC1	ELKS/Rab6-interacting/CAST family member 1 isoform epsilon [Homo sapiens]	∞	0.023067	3.713e-05	8.071e-05	0.00018739	0.00022086	0.000131522	1	3	6	7	4.25	0	0	0	0	0	0	0	0	0	0
GDI2	rab GDP dissociation inhibitor beta isoform 1 [Homo sapiens]	∞	0.0277214	0.00037242	0.00013493	7.833e-05	0.00015825	0.000185982	4	2	1	2	2.25	0	0	0	0	0	0	0	0	0	0
GRIPAP1	1 genes:GRIPAP1. 1 proteins in this group did not match any genes. gi|46592991|ref|NP_064522.3|:GRIPAP1:GRIP1-associated protein 1 [Homo sapiens] ;gi|578838047|ref|XP_005272685.2|:PREDICTED: GRIP1-associated protein 1 isoform X1 [Homo sapiens] ;	∞	0.024518	0.00029559	7.14e-05	8.289e-05	0.00016748	0.00015434	6	2	2	4	3.5	0	0	0	0	0	0	0	0	0	0
GRK2	beta-adrenergic receptor kinase 1 [Homo sapiens]	∞	0.00531686	0.0001804	0.00074076	0.00055646	0.00051106	0.00049717	3	17	11	10	10.25	0	0	0	0	0	0	0	0	0	0
KIAA1217	1 genes:KIAA1217. 8 proteins in this group did not match any genes. gi|50843820|ref|NP_062536.2|:KIAA1217:sickle tail protein homolog isoform 1 [Homo sapiens] ;gi|530392259|ref|XP_005252557.1|:PREDICTED: sickle tail protein homolog isoform X1 [Homo sapiens] ;gi|530392263|ref|XP_005252559.1|:PREDICTED: sickle tail protein homolog isoform X3 [Homo sapiens] ;gi|530392265|ref|XP_005252560.1|:PREDICTE…	∞	4.0445e-05	8.53e-05	0.00010816	0.00010763	7.249e-05	9.3395e-05	4	7	6	4	5.25	0	0	0	0	0	0	0	0	0	0
KIF7	0 genes:. 3 proteins in this group did not match any genes. gi|530407114|ref|XP_005254959.1|:PREDICTED: kinesin-like protein KIF7 isoform X1 [Homo sapiens] ;gi|530407116|ref|XP_005254960.1|:PREDICTED: kinesin-like protein KIF7 isoform X2 [Homo sapiens] ;gi|530407118|ref|XP_005254961.1|:PREDICTED: kinesin-like protein KIF7 isoform X3 [Homo sapiens] ;	∞	0.0244142	0.00021595	4.471e-05	0.00010381	7.866e-05	0.000110782	7	2	4	3	4	0	0	0	0	0	0	0	0	0	0
KLHL22	1 genes:KLHL22. 2 proteins in this group did not match any genes. gi|24432026|ref|NP_116164.2|:KLHL22:kelch-like protein 22 [Homo sapiens] ;gi|578837449|ref|XP_006724405.1|:PREDICTED: kelch-like protein 22 isoform X1 [Homo sapiens] ;gi|578837451|ref|XP_006724406.1|:PREDICTED: kelch-like protein 22 isoform X2 [Homo sapiens] ;	∞	0.0255578	0	0.00023677	0.00027488	0.00022216	0.000244603	0	5	5	4	3.5	0	0	0	0	0	0	0	0	0	0
KLHL9	kelch-like protein 9 [Homo sapiens]	∞	0.0017698	0.00028203	0.00016422	0.00011298	0.00022828	0.000196878	4.2	3.375	2	4	3.39375	0	0	0	0	0	0	0	0	0	0
LASP1	LIM and SH3 domain protein 1 isoform a [Homo sapiens]	∞	0.0368212	0.00015874	0.00172543	0.00093481	0.00067455	0.000873382	1	15	7	5	7	0	0	0	0	0	0	0	0	0	0
LCP1	PREDICTED: plastin-2 isoform X2 [Homo sapiens]	∞	0.00573521	0.00019824	0.00038306	0.00011118	0.0002808	0.00024332	3	8	2	5	4.5	0	0	0	0	0	0	0	0	0	0
METTL2A	2 genes:METTL2A,METTL2B.gi|165932358|ref|NP_859076.3|:METTL2A:methyltransferase-like protein 2A [Homo sapiens] ;gi|93141204|ref|NP_060866.2|:METTL2B:methyltransferase-like protein 2B [Homo sapiens] ;	∞	0.0222129	0.00010961	0.00055597	0.00036883	0.00018631	0.00030518	1	7	4	2	3.5	0	0	0	0	0	0	0	0	0	0
MTMR14	1 genes:MTMR14.gi|117938270|ref|NP_001070993.1|:MTMR14:myotubularin-related protein 14 isoform 2 [Homo sapiens] ;gi|530373012|ref|XP_005265457.1|:MTMR14:PREDICTED: myotubularin-related protein 14 isoform X1 [Homo sapiens] ;	∞	0.000519762	0.00019123	0.00013857	0.00021449	0.00010834	0.000163157	3	3	4	2	3	0	0	0	0	0	0	0	0	0	0
MTMR2	1 genes:MTMR2. 1 proteins in this group did not match any genes. gi|44680154|ref|NP_057240.3|:MTMR2:myotubularin-related protein 2 isoform 1 [Homo sapiens] ;gi|578822450|ref|XP_006718996.1|:PREDICTED: myotubularin-related protein 2 isoform X3 [Homo sapiens] ;gi|578822456|ref|XP_006718999.1|:MTMR2:PREDICTED: myotubularin-related protein 2 isoform X6 [Homo sapiens] ;	∞	0.0347862	0.00032218	4.669e-05	0.00010841	0.00016428	0.00016039	5	1	2	3	2.75	0	0	0	0	0	0	0	0	0	0
MVB12A	multivesicular body subunit 12A [Homo sapiens]	∞	0.0126921	0.00030353	0.00054986	0.00012767	0.00025796	0.000309755	2	5	1	2	2.5	0	0	0	0	0	0	0	0	0	0
PDLIM7	1 genes:PDLIM7. 2 proteins in this group did not match any genes. gi|11496885|ref|NP_005442.2|:PDLIM7:PDZ and LIM domain protein 7 isoform 1 [Homo sapiens] ;gi|42741675|ref|NP_976227.1|:PDLIM7:PDZ and LIM domain protein 7 isoform 2 [Homo sapiens] ;gi|578811282|ref|XP_006715000.1|:PREDICTED: PDZ and LIM domain protein 7 isoform X1 [Homo sapiens] ;gi|578811284|ref|XP_006715001.1|:PREDICTED: PDZ and…	∞	0.0316138	9.066e-05	0.00019708	0.00038134	0.0006164	0.00032137	1	3	5	8	4.25	0	0	0	0	0	0	0	0	0	0
PIBF1	progesterone-induced-blocking factor 1 [Homo sapiens]	∞	0.0282914	5.473e-05	0.0003966	0.00013813	0.0003256	0.000228765	1	10	3	7	5.25	0	0	0	0	0	0	0	0	0	0
PIN1	peptidyl-prolyl cis-trans isomerase NIMA-interacting 1 [Homo sapiens]	∞	0.00565379	0.00203348	0.00073675	0.001283	0.00086409	0.00122933	8	4	6	4	5.5	0	0	0	0	0	0	0	0	0	0
PLEKHA7	0 genes:. 6 proteins in this group did not match any genes. gi|578820338|ref|XP_006718212.1|:PREDICTED: pleckstrin homology domain-containing family A member 7 isoform X3 [Homo sapiens] ;gi|578820340|ref|XP_006718213.1|:PREDICTED: pleckstrin homology domain-containing family A member 7 isoform X4 [Homo sapiens] ;gi|578820342|ref|XP_006718214.1|:PREDICTED: pleckstrin homology domain-containing fam…	∞	0.0224556	9.106e-05	2.199e-05	2.553e-05	7.739e-05	5.39925e-05	3	1	1	3	2	0	0	0	0	0	0	0	0	0	0
PLS3	plastin-3 isoform 1 [Homo sapiens]	∞	0.00147167	6.577e-05	0.00014296	0.00011065	0.00016767	0.000121763	1	3	2	3	2.25	0	0	0	0	0	0	0	0	0	0
POC5	1 genes:POC5.gi|151101311|ref|NP_001092741.1|:POC5:centrosomal protein POC5 isoform 1 [Homo sapiens] ;gi|530379158|ref|XP_005248493.1|:POC5:PREDICTED: centrosomal protein POC5 isoform X2 [Homo sapiens] ;	∞	0.00319121	0.00014411	0.00010443	0.00018185	6.124e-05	0.000122908	2	2	3	1	2	0	0	0	0	0	0	0	0	0	0
RINL	1 genes:RINL.gi|307938276|ref|NP_001182762.1|:RINL:ras and Rab interactor-like protein isoform 1 [Homo sapiens] ;gi|578833951|ref|XP_006723078.1|:RINL:PREDICTED: ras and Rab interactor-like protein isoform X1 [Homo sapiens] ;	∞	5.25667e-06	0.0001464	0.00010609	0.00012316	0.00012442	0.000125018	2	2	2	2	2	0	0	0	0	0	0	0	0	0	0
RTKN	1 genes:RTKN.gi|19526471|ref|NP_149035.1|:RTKN:rhotekin isoform b [Homo sapiens] ;gi|62739179|ref|NP_001015055.1|:RTKN:rhotekin isoform a [Homo sapiens] ;gi|62739181|ref|NP_001015056.1|:RTKN:rhotekin isoform c [Homo sapiens] ;	∞	0.0289752	0.00067798	0.00016376	0.00019012	0.00032011	0.000337992	9	3	3	5	5	0	0	0	0	0	0	0	0	0	0
SH2D4A	1 genes:SH2D4A. 1 proteins in this group did not match any genes. gi|292658783|ref|NP_001167630.1|:SH2D4A:SH2 domain-containing protein 4A isoform a [Homo sapiens] ;gi|578815431|ref|XP_006716441.1|:PREDICTED: SH2 domain-containing protein 4A isoform X1 [Homo sapiens] ;	∞	0.00355457	0.00027378	0.00026452	0.00023032	7.756e-05	0.000211545	3	4	3	1	2.75	0	0	0	0	0	0	0	0	0	0
SNX4	sorting nexin-4 [Homo sapiens]	∞	0.0120219	0.00027621	0.00013343	7.746e-05	0.00031299	0.000200023	3	2	1	4	2.5	0	0	0	0	0	0	0	0	0	0
STXBP5	1 genes:STXBP5.gi|189217897|ref|NP_640337.3|:STXBP5:syntaxin-binding protein 5 isoform a [Homo sapiens] ;gi|189217915|ref|NP_001121187.1|:STXBP5:syntaxin-binding protein 5 isoform b [Homo sapiens] ;gi|578812400|ref|XP_006715402.1|:STXBP5:PREDICTED: syntaxin-binding protein 5 isoform X4 [Homo sapiens] ;	∞	0.000945107	0.00011148	5.385e-05	9.378e-05	6.316e-05	8.05675e-05	3	2	3	2	2.5	0	0	0	0	0	0	0	0	0	0
SUFU	suppressor of fused homolog isoform 1 [Homo sapiens]	∞	0.00409385	0.00077043	0.00024812	0.00072014	0.00094577	0.000671115	9	4	10	13	9	0	0	0	0	0	0	0	0	0	0
TMEM57	macoilin isoform a [Homo sapiens]	∞	6.45284e-07	0.00224632	0.0021703	0.00262462	0.00254542	0.00239666	36	48	50	48	45.5	0	0	0	0	0	0	0	0	0	0
TRIP6	thyroid receptor-interacting protein 6 [Homo sapiens]	∞	0.00190846	0.00034817	0.00018922	0.00014645	0.0002959	0.000244935	4	3	2	4	3.25	0	0	0	0	0	0	0	0	0	0
USP53	1 genes:USP53. 1 proteins in this group did not match any genes. gi|530377852|ref|XP_005263131.1|:PREDICTED: inactive ubiquitin carboxyl-terminal hydrolase 53 isoform X2 [Homo sapiens] ;gi|530377856|ref|XP_005263133.1|:USP53:PREDICTED: inactive ubiquitin carboxyl-terminal hydrolase 53 isoform X4 [Homo sapiens] ;	∞	0.000180826	0.00015445	0.00011192	9.745e-05	0.00016408	0.000131975	4	4	3	5	4	0	0	0	0	0	0	0	0	0	0
ZC2HC1A	zinc finger C2HC domain-containing protein 1A [Homo sapiens]	∞	0.0336143	0	0.00036951	0.00053623	0.00032503	0.000410257	0	4	5	3	3	0	0	0	0	0	0	0	0	0	0
BICD2	protein bicaudal D homolog 2 isoform 1 [Homo sapiens]	76.684	3.9165e-09	0.104136	0.108502	0.111903	0.113831	0.109593	2148.97	3090	2745	2764	2686.99	0.00180813	0.00140238	0.00127515	0.00123094	0.00142915	74	35	36	28	43.25
HERC2	1 genes:HERC2. 1 proteins in this group did not match any genes. gi|126032348|ref|NP_004658.3|:HERC2:E3 ubiquitin-protein ligase HERC2 [Homo sapiens] ;gi|530405222|ref|XP_005268334.1|:PREDICTED: E3 ubiquitin-protein ligase HERC2 isoform X3 [Homo sapiens] ;	27.5095	1.09712e-06	0.00052283	0.00045338	0.00054799	0.00056817	0.000523092	61	73	76	78	72	3.025e-05	0	0	7.78e-06	1.9015e-05	7	0	0	1	2
PDLIM5	PDZ and LIM domain protein 5 isoform a [Homo sapiens]	19.6573	6.98907e-05	0.00208551	0.00236754	0.00152052	0.0017724	0.00193649	30	47	26	30	33.25	5.842e-05	0.00022992	8.469e-05	2.102e-05	9.85125e-05	1.66667	4	1.66667	0.333333	1.91667
CC2D1A	PREDICTED: coiled-coil and C2 domain-containing protein 1A isoform X2 [Homo sapiens]	18.8224	0.0111658	0.00218064	0.00097968	0.00097227	0.00077836	0.00122774	50	31	26.5	21	32.125	0.00011362	6.01e-05	2.125e-05	6.594e-05	6.52275e-05	5.16667	1.66667	0.666667	1.66667	2.29167
SYNJ1	1 genes:SYNJ1. 5 proteins in this group did not match any genes. gi|237757310|ref|NP_003886.3|:SYNJ1:synaptojanin-1 isoform a [Homo sapiens] ;gi|237757326|ref|NP_001153778.1|:SYNJ1:synaptojanin-1 isoform d [Homo sapiens] ;gi|530419122|ref|XP_005261133.1|:PREDICTED: synaptojanin-1 isoform X2 [Homo sapiens] ;gi|578836711|ref|XP_006724121.1|:PREDICTED: synaptojanin-1 isoform X8 [Homo sapiens] ;gi|57…	18.7836	0.00296362	0.00025702	0.0006146	0.00047569	0.00074268	0.000522497	10	33	22	34	24.75	3.888e-05	2.125e-05	0	2.332e-05	2.78167e-05	3	1	0	1	1.25
MIB1	E3 ubiquitin-protein ligase MIB1 [Homo sapiens]	17.6857	0.000423578	0.001112	0.00128327	0.00090082	0.00066503	0.00099028	27	43	26	19	28.75	0.00010383	3.405e-05	3.01e-05	0	5.59933e-05	5	1	1	0	1.75
ST7	suppressor of tumorigenicity 7 protein isoform b [Homo sapiens]	15.7368	0.00336082	0.00101987	0.0003849	0.00113204	0.00072229	0.000814775	14.4	7.5	19	12	13.225	7.142e-05	0	0	3.213e-05	5.1775e-05	2	0	0	0.5	0.625
CEP55	centrosomal protein of 55 kDa [Homo sapiens]	15.3314	3.77849e-06	0.00196446	0.00200581	0.00202819	0.00159363	0.00189802	22	31	27	21	25.25	0.00022512	0	6.527e-05	8.101e-05	0.0001238	5	0	1	1	1.75
CTTN	src substrate cortactin isoform a [Homo sapiens]	14.2941	2.89956e-05	0.00685514	0.00977095	0.00929464	0.00768789	0.00840215	91	179	146.667	120.083	134.187	0.00093061	0.00040487	0.0006057	0.00041005	0.000587808	24.5	6.5	11	6	12
DNMBP	dynamin-binding protein [Homo sapiens]	14.2858	6.95408e-06	0.00102464	0.00093285	0.00079567	0.00080382	0.000889245	39	49	36	36	40	5.299e-05	0	3.841e-05	9.534e-05	6.22467e-05	4	0	2	4	2.5
CC2D1A	PREDICTED: coiled-coil and C2 domain-containing protein 1A isoform X3 [Homo sapiens]	13.635	0.00783161	0.00021875	0.00095108	0.00090174	0.00079942	0.000717747	5	30	24.5	21.5	20.25	8.089e-05	4.22e-05	2.132e-05	6.615e-05	5.264e-05	3.66667	1.16667	0.666667	1.66667	1.79167
PDLIM3	PDZ and LIM domain protein 3 isoform b [Homo sapiens]	13.2665	0.00809967	0.00104892	0.00180515	0.0005515	0.00089144	0.00107425	8	19	5	8	10	6.611e-05	0	9.584e-05	0	8.0975e-05	1	0	1	0	0.5
GPBP1	1 genes:GPBP1. 1 proteins in this group did not match any genes. gi|28875782|ref|NP_075064.1|:GPBP1:vasculin isoform 1 [Homo sapiens] ;gi|530379446|ref|XP_005248631.1|:PREDICTED: vasculin isoform X4 [Homo sapiens] ;gi|578810503|ref|XP_006714736.1|:GPBP1:PREDICTED: vasculin isoform X5 [Homo sapiens] ;gi|578810505|ref|XP_006714737.1|:GPBP1:PREDICTED: vasculin isoform X6 [Homo sapiens] ;	12.7741	6.55039e-05	0.00070076	0.00050778	0.00073689	0.00081888	0.000691078	8	8	10	11	9.25	4.417e-05	0	6.403e-05	0	5.41e-05	1	0	1	0	0.5
MAP4K3	mitogen-activated protein kinase kinase kinase kinase 3 isoform 1 [Homo sapiens]	12.3211	0.000414765	0.00013903	0.00020149	0.00011696	0.00011816	0.00014391	3	6	3	3	3.75	1.168e-05	0	0	0	1.168e-05	0.5	0	0	0	0.125
ABI2	PREDICTED: abl interactor 2 isoform X14 [Homo sapiens]	11.8519	0.000135451	0.00068926	0.00077692	0.00103083	0.00065086	0.000786968	9	14	16	10	12.25	0	6.332e-05	0	6.948e-05	6.64e-05	0	1	0	1	0.5
CC2D1A	coiled-coil and C2 domain-containing protein 1A [Homo sapiens]	10.9481	0.00998073	0.00021783	0.00101022	0.00098957	0.00083308	0.000762675	5	32	27	22.5	21.625	0.0001135	7.805e-05	2.123e-05	6.587e-05	6.96625e-05	5.16667	2.16667	0.666667	1.66667	2.41667
SORBS1	sorbin and SH3 domain-containing protein 1 isoform 2 [Homo sapiens]	10.3851	0.00493951	0.00022595	0.00029924	0.00018438	9.493e-05	0.000201125	4.45	8.13333	4.31667	2.2	4.775	2.304e-05	0	7.42e-06	2.764e-05	1.93667e-05	0.9	0	0.2	0.6	0.425
TNIK	1 genes:TNIK.gi|239735580|ref|NP_001155032.1|:TNIK:TRAF2 and NCK-interacting protein kinase isoform 2 [Homo sapiens] ;gi|239735582|ref|NP_001155033.1|:TNIK:TRAF2 and NCK-interacting protein kinase isoform 3 [Homo sapiens] ;gi|239735584|ref|NP_001155034.1|:TNIK:TRAF2 and NCK-interacting protein kinase isoform 4 [Homo sapiens] ;gi|239735586|ref|NP_001155035.1|:TNIK:TRAF2 and NCK-interacting protein…	10.3764	0.00529079	9.194e-05	0.00028868	0.00028358	0.00018231	0.000211627	3	13	11	7	8.5	1.545e-05	2.534e-05	0	0	2.0395e-05	1	1	0	0	0.5
SNCA	alpha-synuclein isoform NACP140 [Homo sapiens]	10.213	0.0146023	0.00029594	0.00235891	0.0016805	0.00176059	0.00152399	1	11	6.75	7	6.4375	0.00014922	0	0	0	0.00014922	1	0	0	0	0.25
SORBS1	PREDICTED: sorbin and SH3 domain-containing protein 1 isoform X68 [Homo sapiens]	9.85943	0.00582846	0.00018364	0.00023324	0.00012671	7.716e-05	0.000155187	4.45	7.8	3.65	2.2	4.525	1.873e-05	0	6.03e-06	2.246e-05	1.574e-05	0.9	0	0.2	0.6	0.425
CALD1	1 genes:CALD1. 1 proteins in this group did not match any genes. gi|15149463|ref|NP_149130.1|:CALD1:caldesmon isoform 4 [Homo sapiens] ;gi|15149465|ref|NP_149131.1|:CALD1:caldesmon isoform 5 [Homo sapiens] ;gi|578814641|ref|XP_006716200.1|:PREDICTED: caldesmon isoform X2 [Homo sapiens] ;	9.7879	0.0165221	0.00074251	0.00231356	0.00093696	0.00119896	0.001298	10	43	15	19	21.75	0.00022464	0.00018418	5.427e-05	6.736e-05	0.000132612	6	3	1	1	2.75
SLAIN2	1 genes:SLAIN2.gi|149588928|ref|NP_065897.1|:SLAIN2:SLAIN motif-containing protein 2 [Homo sapiens] ;gi|530376700|ref|XP_005248178.1|:SLAIN2:PREDICTED: SLAIN motif-containing protein 2 isoform X1 [Homo sapiens] ;	9.71557	5.57677e-05	0.00057049	0.00082678	0.00059991	0.00072726	0.00068111	8	16	10	12	11.5	3.596e-05	0	0.00010425	0	7.0105e-05	1	0	2	0	0.75
DBNL	1 genes:DBNL.gi|21361670|ref|NP_054782.2|:DBNL:drebrin-like protein isoform a [Homo sapiens] ;gi|62198235|ref|NP_001014436.1|:DBNL:drebrin-like protein isoform b [Homo sapiens] ;	9.34109	0.00210076	0.00355682	0.00466707	0.00283044	0.00204244	0.00327419	37	67	35	25	41	0.00063013	0.00015897	0.00035133	0.00026163	0.000350515	13	2	5	3	5.75
EFHD2	EF-hand domain-containing protein D2 [Homo sapiens]	9.28649	0.00161441	0.00276215	0.00175131	0.00130706	0.00161387	0.0018586	16	14	9	11	12.5	8.705e-05	0	0	0.00031323	0.00020014	1	0	0	2	0.75
TSR1	pre-rRNA-processing protein TSR1 homolog [Homo sapiens]	9.22364	0.000828599	0.00046379	0.00022405	0.00030346	0.00035037	0.000335418	9	6	7	8	7.5	2.598e-05	0	0	4.675e-05	3.6365e-05	1	0	0	1	0.5
BCCIP	BRCA2 and CDKN1A-interacting protein isoform BCCIPalpha [Homo sapiens]	8.79378	0.00699278	0.00501818	0.00205123	0.00443805	0.00213239	0.00340996	39	22	41	19.5	30.375	0	0.00042557	0.00032918	0.00040856	0.00038777	0	4	3.5	3.5	2.75
TES	testin isoform 1 [Homo sapiens]	8.49412	0.00091988	0.00157462	0.001141	0.00074512	0.00133821	0.00119974	16	16	9	16	14.25	0.00019849	8.137e-05	0.00014387	0	0.000141243	4	1	2	0	1.75
ANXA2	1 genes:ANXA2.gi|209862831|ref|NP_001129487.1|:ANXA2:annexin A2 isoform 2 [Homo sapiens] ;gi|50845388|ref|NP_001002858.1|:ANXA2:annexin A2 isoform 1 [Homo sapiens] ;	8.06829	0.0171318	0.00109997	0.00239117	0.0024676	0.00446638	0.00260628	9	27	24	43	25.75	0.00043138	0.00030317	0.00044668	0.00011088	0.000323028	7	3	5	1	4
SEPT7	1 genes:SEPT7. 4 proteins in this group did not match any genes. gi|148352329|ref|NP_001011553.2|:SEPT7:septin-7 isoform 2 [Homo sapiens] ;gi|148352331|ref|NP_001779.3|:SEPT7:septin-7 isoform 1 [Homo sapiens] ;gi|578813710|ref|XP_006715869.1|:SEPT7:PREDICTED: septin-7 isoform X1 [Homo sapiens] ;gi|578813712|ref|XP_006715870.1|:PREDICTED: septin-7 isoform X2 [Homo sapiens] ;gi|578813714|ref|XP_006…	8.01582	0.000146558	0.0023757	0.00165261	0.00247822	0.0018575	0.00209101	25	24	31	23	25.75	0.00038332	0.00015715	0.00041676	8.621e-05	0.00026086	8	2	6	1	4.25
PDAP1	28 kDa heat- and acid-stable phosphoprotein [Homo sapiens]	7.98552	0.000848898	0.00206016	0.00414675	0.0030811	0.00330718	0.0031488	9	25	16	17	16.75	0.00080795	0	0.00016732	0.00020767	0.000394313	7	0	1	1	2.25
HSD17B4	peroxisomal multifunctional enzyme type 2 isoform 2 [Homo sapiens]	7.91605	0.0317597	0.00045035	0.00016317	0.00018943	9.568e-05	0.000224657	8	4	4	2	4.5	2.838e-05	0	0	0	2.838e-05	1	0	0	0	0.25
ATP6V1A	V-type proton ATPase catalytic subunit A [Homo sapiens]	7.83806	0.000602654	0.00040291	0.00063256	0.00033895	0.00045655	0.000457742	6	13	6	8	8.25	6.772e-05	0	4.908e-05	0	5.84e-05	2	0	1	0	0.75
SEPT9	1 genes:SEPT9.gi|116256489|ref|NP_006631.2|:SEPT9:septin-9 isoform c [Homo sapiens] ;gi|164698494|ref|NP_001106963.1|:SEPT9:septin-9 isoform a [Homo sapiens] ;gi|164698498|ref|NP_001106965.1|:SEPT9:septin-9 isoform b [Homo sapiens] ;	7.80812	4.29758e-05	0.00160477	0.00163855	0.00196366	0.00216974	0.00184418	22	31	32	35	30	0.00033102	0.00036188	5.332e-05	0.00019853	0.000236188	9	6	1	3	4.75
ZC3H7A	PREDICTED: zinc finger CCCH domain-containing protein 7A isoform X5 [Homo sapiens]	7.77598	0.00417207	0.0009814	0.00040195	0.00057433	0.00061648	0.00064354	23	13	16	17	17.25	0.00019364	3.528e-05	0	1.936e-05	8.276e-05	9	1	0	0.5	2.625
ECE1	1 genes:ECE1.gi|164519138|ref|NP_001106819.1|:ECE1:endothelin-converting enzyme 1 isoform 4 [Homo sapiens] ;gi|164519140|ref|NP_001106820.1|:ECE1:endothelin-converting enzyme 1 isoform 2 [Homo sapiens] ;gi|4503443|ref|NP_001388.1|:ECE1:endothelin-converting enzyme 1 isoform 1 [Homo sapiens] ;gi|578798498|ref|XP_006710461.1|:ECE1:PREDICTED: endothelin-converting enzyme 1 isoform X1 [Homo sapiens] ;	7.65385	0.00165865	0.00049455	0.00027872	0.00023113	0.0003736	0.0003445	9	7	5	8	7.25	0	0	4.017e-05	4.985e-05	4.501e-05	0	0	1	1	0.5
IST1	1 genes:IST1.gi|401709930|ref|NP_001257904.1|:IST1:IST1 homolog isoform a [Homo sapiens] ;gi|401709932|ref|NP_001257905.1|:IST1:IST1 homolog isoform c [Homo sapiens] ;	7.51088	0.00262149	0.00169804	0.00139449	0.00152371	0.00067345	0.00132242	15	17	16	7	13.75	0.00034248	9.36e-05	0.00016549	0.0001027	0.000176067	6	1	2	1	2.5
BIN3	1 genes:BIN3.gi|530387915|ref|XP_005273630.1|:BIN3:PREDICTED: bridging integrator 3 isoform X1 [Homo sapiens] ;gi|8923904|ref|NP_061158.1|:BIN3:bridging integrator 3 [Homo sapiens] ;	7.44333	0.0115718	0.00080843	0.00102516	0.00017002	0.00103059	0.00075855	4	7	1	6	4.5	0.00010191	0	0	0	0.00010191	1	0	0	0	0.25
WDR18	WD repeat-containing protein 18 [Homo sapiens]	7.43057	0.000572869	0.00038363	0.00048648	0.00032273	0.00024453	0.000359343	4	7	4	3	4.5	4.836e-05	0	0	0	4.836e-05	1	0	0	0	0.25
TJP2	tight junction protein ZO-2 isoform 1 [Homo sapiens]	7.38277	6.20005e-07	0.00543145	0.00549992	0.00623874	0.00615465	0.00583119	156	218	213	208	198.75	0.00086023	0.00057577	0.00071259	0.00101076	0.000789838	49	20	28	32	32.25
EIF5A	1 genes:EIF5A.gi|219555707|ref|NP_001137232.1|:EIF5A:eukaryotic translation initiation factor 5A-1 isoform A [Homo sapiens] ;gi|530410036|ref|XP_005256566.1|:EIF5A:PREDICTED: eukaryotic translation initiation factor 5A-1 isoform X5 [Homo sapiens] ;	7.15213	0.000448397	0.0155371	0.0262697	0.0236786	0.0287052	0.0235476	69	161	125	150	126.25	0.00510926	0.0026066	0.00279806	0.00265565	0.00329239	45	14	17	13	22.25
OCRL	1 genes:OCRL. 1 proteins in this group did not match any genes. gi|13325072|ref|NP_000267.2|:OCRL:inositol polyphosphate 5-phosphatase OCRL-1 isoform a [Homo sapiens] ;gi|578838686|ref|XP_006724823.1|:PREDICTED: inositol polyphosphate 5-phosphatase OCRL-1 isoform X3 [Homo sapiens] ;	6.97802	0.00205862	0.00036788	0.00019993	0.00042553	0.00050805	0.000375348	8	6	11	13	9.5	6.956e-05	3.802e-05	0	0	5.379e-05	3	1	0	0	1
PXN	1 genes:PXN. 10 proteins in this group did not match any genes. gi|170932514|ref|NP_001074324.1|:PXN:paxillin isoform 2 [Homo sapiens] ;gi|170932516|ref|NP_002850.2|:PXN:paxillin isoform 1 [Homo sapiens] ;gi|344217711|ref|NP_001230685.1|:PXN:paxillin isoform 3 [Homo sapiens] ;gi|530401367|ref|XP_005253967.1|:PREDICTED: paxillin isoform X1 [Homo sapiens] ;gi|530401375|ref|XP_005253970.1|:PREDICTED…	6.92122	0.000174065	0.00063095	0.00076199	0.00058976	0.00095328	0.000733995	9	15	10	16	12.5	0.00010605	0	0	0	0.00010605	3	0	0	0	0.75
ARPC2	actin-related protein 2/3 complex subunit 2 [Homo sapiens]	6.90215	0.000787276	0.00082864	0.0008006	0.0013942	0.00082161	0.000961263	6	8	12	7	8.25	0.00013927	0	0	0	0.00013927	2	0	0	0	0.5
SNX9	sorting nexin-9 [Homo sapiens]	6.89268	6.52529e-05	0.00382987	0.00398618	0.00521359	0.00520778	0.00455935	55	79	89	88	77.75	0.00101823	0.00046061	0.00066169	0.00050538	0.000661478	29	8	13	8	14.5
NFKB1	1 genes:NFKB1. 2 proteins in this group did not match any genes. gi|259155302|ref|NP_001158884.1|:NFKB1:nuclear factor NF-kappa-B p105 subunit isoform 2 [Homo sapiens] ;gi|34577122|ref|NP_003989.2|:NFKB1:nuclear factor NF-kappa-B p105 subunit isoform 1 [Homo sapiens] ;gi|530377761|ref|XP_005263086.1|:PREDICTED: nuclear factor NF-kappa-B p105 subunit isoform X1 [Homo sapiens] ;gi|578809151|ref|XP_…	6.83103	0.000845933	0.00029961	0.00015507	0.00028806	0.00021825	0.000240247	7	5	8	6	6.5	0	3.539e-05	3.129e-05	3.883e-05	3.517e-05	0	1	1	1	0.75
TRDMT1	1 genes:TRDMT1.gi|4758184|ref|NP_004403.1|:TRDMT1:tRNA (cytosine(38)-C(5))-methyltransferase [Homo sapiens] ;gi|530392002|ref|XP_005252432.1|:TRDMT1:PREDICTED: tRNA (cytosine(38)-C(5))-methyltransferase isoform X4 [Homo sapiens] ;	6.74645	0.0240191	0.00190736	0.00069105	0.000624	0.00099061	0.00105326	18	9	7	11	11.25	0.00026715	8.762e-05	7.745e-05	0.00019226	0.00015612	5	1	1	2	2.25
ALDH1A2	1 genes:ALDH1A2.gi|25777724|ref|NP_003879.2|:ALDH1A2:retinal dehydrogenase 2 isoform 1 [Homo sapiens] ;gi|25777726|ref|NP_733797.1|:ALDH1A2:retinal dehydrogenase 2 isoform 2 [Homo sapiens] ;	6.74538	1.35569e-05	0.00063988	0.00052163	0.00047101	0.00054381	0.000544083	8	9	7	8	8	8.066e-05	0	0	0	8.066e-05	2	0	0	0	0.5
EPS8	0 genes:. 2 proteins in this group did not match any genes. gi|530399079|ref|XP_005253396.1|:PREDICTED: epidermal growth factor receptor kinase substrate 8 isoform X1 [Homo sapiens] ;gi|578822816|ref|XP_006719120.1|:PREDICTED: epidermal growth factor receptor kinase substrate 8 isoform X3 [Homo sapiens] ;	6.70903	0.0141955	0.00034817	0.00028833	0.00016737	8.454e-05	0.000222103	7	8	4	2	5.25	2.508e-05	4.113e-05	0	0	3.3105e-05	1	1	0	0	0.5
MTMR9	myotubularin-related protein 9 [Homo sapiens]	6.70033	6.51722e-05	0.00022641	0.00021874	0.00025395	0.00032069	0.000254948	3	4	4	5	4	3.805e-05	0	0	0	3.805e-05	1	0	0	0	0.25
SH3PXD2B	SH3 and PX domain-containing protein 2B [Homo sapiens]	6.69189	0.00138115	0.00013644	0.00013182	0.00022956	0.00011596	0.000153445	3	4	6	3	4	2.293e-05	0	0	0	2.293e-05	1	0	0	0	0.25
SH3GL1	endophilin-A2 isoform 1 [Homo sapiens]	6.4319	0.00153097	0.00223299	0.00198736	0.001122	0.00253355	0.00196897	19.8333	24.36	11.8462	26.4783	20.6294	0.00042577	0.00018619	0	0.00030642	0.000306127	7.5	2	0	3	3.125
TPD52L2	tumor protein D54 isoform e [Homo sapiens]	6.41856	0.0142888	0.00134085	0.00714127	0.00727554	0.00717909	0.00573419	6.66667	49	43	42	35.1667	0	0.00066521	0.0011026	0.00091232	0.000893377	0	4	7.5	5	4.125
MAP7D2	1 genes:MAP7D2.gi|270483742|ref|NP_001161937.1|:MAP7D2:MAP7 domain-containing protein 2 isoform 1 [Homo sapiens] ;gi|578837857|ref|XP_006724544.1|:MAP7D2:PREDICTED: MAP7 domain-containing protein 2 isoform X4 [Homo sapiens] ;	6.36422	0.0123806	0.000268	0.00019419	0.00018036	4.555e-05	0.000172025	5	5	4	1	3.75	2.703e-05	0	0	0	2.703e-05	1	0	0	0	0.25
EIF4B	1 genes:EIF4B. 1 proteins in this group did not match any genes. gi|50053795|ref|NP_001408.2|:EIF4B:eukaryotic translation initiation factor 4B [Homo sapiens] ;gi|530399910|ref|XP_005268766.1|:PREDICTED: eukaryotic translation initiation factor 4B isoform X1 [Homo sapiens] ;	6.35569	0.00442411	0.00169526	0.00456971	0.00450661	0.00403407	0.00370141	25	93	79	70	66.75	0.00112833	0.00033641	0.00049566	0.00036911	0.000582378	33	6	10	6	13.75
TANK	1 genes:TANK. 4 proteins in this group did not match any genes. gi|312433953|ref|NP_001186064.1|:TANK:TRAF family member-associated NF-kappa-B activator isoform a [Homo sapiens] ;gi|530369619|ref|XP_005246263.1|:PREDICTED: TRAF family member-associated NF-kappa-B activator isoform X1 [Homo sapiens] ;gi|530369621|ref|XP_005246264.1|:PREDICTED: TRAF family member-associated NF-kappa-B activator iso…	6.34939	0.0487987	0.00048744	0	0.00032805	0.0003314	0.000382297	5	0	4	4	3.25	4.916e-05	0	7.126e-05	0	6.021e-05	1	0	1	0	0.5
PPP2R3A	PREDICTED: serine/threonine-protein phosphatase 2A regulatory subunit B'' subunit alpha isoform X1 [Homo sapiens]	6.2155	0.0207567	0.00010808	0.00057434	0.00039401	0.00036743	0.000360965	3	22	13	12	12.5	9.083e-05	2.979e-05	7.9e-05	3.268e-05	5.8075e-05	5	1	3	1	2.5
PAWR	PREDICTED: PRKC apoptosis WT1 regulator protein isoform X1 [Homo sapiens]	6.20696	1.82379e-05	0.00109673	0.00105962	0.00102514	0.00093207	0.00102839	9	12	10	9	10	0.00030722	0.00010076	8.907e-05	0	0.000165683	5	1	1	0	1.75
PPIP5K2	PREDICTED: inositol hexakisphosphate and diphosphoinositol-pentakisphosphate kinase 2 isoform X3 [Homo sapiens]	6.18245	0.0114196	3.391e-05	0.0001515	0.00017114	0.00010565	0.00011555	1	6.16667	6	3.66667	4.20833	0	1.869e-05	0	0	1.869e-05	0	0.666667	0	0	0.166667
USP15	ubiquitin carboxyl-terminal hydrolase 15 isoform 2 [Homo sapiens]	6.15966	0.0126381	0.00021761	0.00040997	0.00076308	0.00044385	0.000458627	5	13	20.8421	12	12.7105	8.778e-05	7.197e-05	6.362e-05	0	7.44567e-05	4	2	2	0	2
TXLNG	gamma-taxilin isoform 1 [Homo sapiens]	6.12715	0.000189026	0.00086317	0.00056861	0.00066013	0.00080027	0.000723045	11	10	10	12	10.75	3.957e-05	0	0.00017207	0.00014238	0.000118007	1	0	3	2	1.5
GAMT	guanidinoacetate N-methyltransferase isoform a [Homo sapiens]	5.99109	0.0440929	0.0026334	0.00216264	0.00073845	0.00044761	0.00149552	15	17	5	3	10	0.00035409	0.00014516	0	0	0.000249625	4	1	0	0	1.25
CCDC50	coiled-coil domain-containing protein 50 short isoform [Homo sapiens]	5.93661	0.0039003	0.0004062	0.0007849	0.00056952	0.00103564	0.000699065	3	8	5	9	6.25	0.00013654	0	9.897e-05	0	0.000117755	2	0	1	0	0.75
TFCP2	alpha-globin transcription factor CP2 isoform 1 [Homo sapiens]	5.86409	0.0261516	0.00301709	0.00082067	0.00135393	0.00168343	0.00171878	36.5556	13.7222	19.5	24	23.4444	0.0005595	0.0004777	6.033e-05	7.488e-05	0.000293103	13.4444	7	1	1	5.61111
CORO1B	coronin-1B [Homo sapiens]	5.83402	0.0230578	0.00025419	0.00024558	0.00042767	0.00079208	0.00042988	3	4	6	11	6	8.544e-05	0	6.193e-05	0	7.3685e-05	2	0	1	0	0.75
PARD3B	1 genes:PARD3B. 2 proteins in this group did not match any genes. gi|119120897|ref|NP_689739.4|:PARD3B:partitioning defective 3 homolog B isoform b [Homo sapiens] ;gi|530369757|ref|XP_005246330.1|:PREDICTED: partitioning defective 3 homolog B isoform X1 [Homo sapiens] ;gi|530369759|ref|XP_005246331.1|:PREDICTED: partitioning defective 3 homolog B isoform X2 [Homo sapiens] ;	5.82549	0.0346395	0	0.00010507	0.00012198	9.242e-05	0.00010649	0	4	4	3	2.75	1.828e-05	0	0	0	1.828e-05	1	0	0	0	0.25
HN1L	hematological and neurological expressed 1-like protein [Homo sapiens]	5.81763	0.000720445	0.00348903	0.00379231	0.00238481	0.00240922	0.00301884	16	24	13	13	16.5	0.00087963	0.00036061	0.00063758	0.00019783	0.000518913	8	2	4	1	3.75
MTMR6	myotubularin-related protein 6 [Homo sapiens]	5.78188	5.40045e-05	0.00080062	0.00067684	0.00095416	0.00068042	0.00077801	12	14	17	12	13.75	0.00013456	0	0	0	0.00013456	4	0	0	0	1
PPP1R2	protein phosphatase inhibitor 2 [Homo sapiens]	5.76413	0.0035796	0.00141476	0.00336838	0.00255036	0.00223294	0.00239161	7	23	15	13	14.5	0.00020382	0.00016711	0.00073866	0.00055006	0.000414913	2	1	5	3	2.75
TTC1	tetratricopeptide repeat protein 1 [Homo sapiens]	5.70316	0.0172089	0.00014189	0.00102817	0.00083556	0.0009647	0.00074258	1	10	7	8	6.5	0.00014309	0.00011732	0	0	0.000130205	2	1	0	0	0.75
SIPA1L3	1 genes:SIPA1L3. 1 proteins in this group did not match any genes. gi|530416035|ref|XP_005258728.1|:SIPA1L3:PREDICTED: signal-induced proliferation-associated 1-like protein 3 isoform X1 [Homo sapiens] ;gi|530416037|ref|XP_005258729.1|:PREDICTED: signal-induced proliferation-associated 1-like protein 3 isoform X2 [Homo sapiens] ;	5.70122	2.71445e-05	0.00020937	0.00018543	0.00015656	0.00017794	0.000182325	9	11	8	9	9.25	2.346e-05	3.847e-05	3.401e-05	0	3.198e-05	2	2	2	0	1.5
UBAP1	PREDICTED: ubiquitin-associated protein 1 isoform X1 [Homo sapiens]	5.68535	0.0382188	0.00132055	0.0010167	0.00055546	0.00021043	0.000775785	16	17	8	3	11	4.162e-05	6.824e-05	0	0.0002995	0.000136453	1	1	0	4	1.5
BAIAP2	1 genes:BAIAP2. 1 proteins in this group did not match any genes. gi|222080100|ref|NP_001138360.1|:BAIAP2:brain-specific angiogenesis inhibitor 1-associated protein 2 isoform 4 [Homo sapiens] ;gi|530411347|ref|XP_005257000.1|:BAIAP2:PREDICTED: brain-specific angiogenesis inhibitor 1-associated protein 2 isoform X2 [Homo sapiens] ;gi|530411349|ref|XP_005257001.1|:BAIAP2:PREDICTED: brain-specific a…	5.68462	0.00409616	0.00015518	0.00028111	0.00039163	0.00046158	0.000322375	2	5	6	7	5	0	0	5.671e-05	0	5.671e-05	0	0	1	0	0.25
GPN1	GPN-loop GTPase 1 isoform a [Homo sapiens]	5.60058	0.000186425	0.00170854	0.00216657	0.00161698	0.00235955	0.00196291	16	28	18	26	22	0.00048459	0.00017659	0.00039027	0	0.000350483	9	2	5	0	4
LIMD1	LIM domain-containing protein 1 [Homo sapiens]	5.5622	0.000722226	0.0019	0.00173207	0.00232022	0.00119803	0.00178758	31	39	45	23	34.5	0.00046356	0	0.0001792	0	0.00032138	15	0	4	0	4.75
TRIM25	E3 ubiquitin/ISG15 ligase TRIM25 [Homo sapiens]	5.42698	0.000675062	0.0019072	0.00238274	0.00315354	0.00195621	0.00234992	29	50	57	35	42.75	0.00066321	0.00032627	0.00038457	0.00035798	0.000433007	20	6	8	6	10
NAP1L1	nucleosome assembly protein 1-like 1 [Homo sapiens]	5.41292	0.00491005	0.00608518	0.00517502	0.0116104	0.00879397	0.00791614	57.4265	67.3973	130.245	97.6505	88.1797	0.00222585	0.00172467	0.00122637	0.00067292	0.00146245	41.6591	19.6842	15.8333	7	21.0442
CSNK1E	casein kinase I isoform epsilon [Homo sapiens]	5.32232	0.00143953	0.00014939	0.00028868	0.00016757	0.00016929	0.000193732	1.5	4	2	2	2.375	0	0	3.64e-05	0	3.64e-05	0	0	0.5	0	0.125
CSNK1D	casein kinase I isoform delta isoform 1 [Homo sapiens]	5.32194	0.00143938	0.00014975	0.00028937	0.00016798	0.00016969	0.000194197	1.5	4	2	2	2.375	0	0	3.649e-05	0	3.649e-05	0	0	0.5	0	0.125
PEBP1	phosphatidylethanolamine-binding protein 1 preproprotein [Homo sapiens]	5.31517	0.0149437	0.00155094	0.00048164	0.00130473	0.00075319	0.00102263	7	3	7	4	5.25	0.00022344	0.0001832	0.00016195	0.000201	0.000192398	2	1	1	1	1.25
NFX1	transcriptional repressor NF-X1 isoform 1 [Homo sapiens]	5.3137	0.00740478	0.00018497	0.00013403	0.00037345	0.00031439	0.00025171	5	5	12	10	8	0	6.118e-05	0	3.356e-05	4.737e-05	0	2	0	1	0.75
PDLIM1	PDZ and LIM domain protein 1 [Homo sapiens]	5.2615	0.00035609	0.00377801	0.0049277	0.00593275	0.00417403	0.00470312	30	54	56	39	44.75	0.00126998	0.00031238	0.00073641	0.00125673	0.000893875	20	3	8	11	10.5
ARPC5	1 genes:ARPC5.gi|394025704|ref|NP_001257368.1|:ARPC5:actin-related protein 2/3 complex subunit 5 isoform 2 [Homo sapiens] ;gi|5031593|ref|NP_005708.1|:ARPC5:actin-related protein 2/3 complex subunit 5 isoform 1 [Homo sapiens] ;	5.22505	0.0124487	0.00053808	0.00175456	0.00113165	0.00068594	0.00102756	2	9	5	3	4.75	0	0	0.00019666	0	0.00019666	0	0	1	0	0.25
CNN2	calponin-2 isoform a [Homo sapiens]	5.20374	0.00719617	0.00093859	0.00178281	0.00152879	0.00068372	0.00123348	7	18.3492	13.5532	6	11.2256	0.00013522	0.0003326	0	0.00024329	0.000237037	2	3	0	2	1.75
FOXO3	forkhead box protein O3 [Homo sapiens]	5.17396	0.0408523	0.00055407	0.00062454	0.00020716	0.00010464	0.000372603	9	14	4	2	7.25	9.313e-05	5.09e-05	0	0	7.2015e-05	3	1	0	0	1
PIH1D1	PIH1 domain-containing protein 1 [Homo sapiens]	5.15509	0.000621884	0.00214304	0.00144936	0.00216341	0.00254981	0.0020764	15	14	18	21	17	0.00050427	0.00035439	0.00010443	0.00064806	0.000402787	7	3	1	5	4
PPP1R8	nuclear inhibitor of protein phosphatase 1 isoform alpha [Homo sapiens]	5.12589	0.000256034	0.0005902	0.00094088	0.00069511	0.00070223	0.000732105	5	11	7	7	7.5	0.00017856	0	0	0.00010709	0.000142825	3	0	0	1	1
EXOSC2	exosome complex component RRP4 isoform 1 [Homo sapiens]	5.11085	0.0339974	0.00098985	0.00061479	0.0014275	0.00228335	0.00132887	7	6	12	19	11	7.13e-05	0.00011692	0.00072353	0.00012829	0.00026001	1	1	7	1	2.5
LTV1	protein LTV1 homolog [Homo sapiens]	5.09811	0.000605977	0.00139561	0.00189616	0.00161433	0.00237216	0.00181956	16	30	22	32	25	0.0004838	0	0.00019127	0.00039566	0.00035691	11	0	3	5	4.75
NEDD1	1 genes:NEDD1. 1 proteins in this group did not match any genes. gi|530399758|ref|XP_005268701.1|:NEDD1:PREDICTED: protein NEDD1 isoform X1 [Homo sapiens] ;gi|578823306|ref|XP_006719299.1|:PREDICTED: protein NEDD1 isoform X2 [Homo sapiens] ;	5.09087	0.0018472	0.00111811	0.00198049	0.00120189	0.00158374	0.00147106	18	44	23	30	28.75	0.0005951	0.00010272	0	0.00016906	0.00028896	19	2	0	3	6
CCDC138	coiled-coil domain-containing protein 138 [Homo sapiens]	5.02911	0.00721306	6.23e-05	0.00015801	0.00013103	7.942e-05	0.00010769	1	3.5	2.5	1.5	2.125	1.571e-05	2.576e-05	2.277e-05	0	2.14133e-05	0.5	0.5	0.5	0	0.375
CCDC138	PREDICTED: coiled-coil domain-containing protein 138 isoform X3 [Homo sapiens]	5.0289	0.0072118	6.175e-05	0.0001566	0.00012986	7.871e-05	0.00010673	1	3.5	2.5	1.5	2.125	1.557e-05	2.553e-05	2.257e-05	0	2.12233e-05	0.5	0.5	0.5	0	0.375
NCKAP1	1 genes:NCKAP1.gi|45545411|ref|NP_995314.1|:NCKAP1:nck-associated protein 1 isoform 2 [Homo sapiens] ;gi|578803511|ref|XP_006712263.1|:NCKAP1:PREDICTED: nck-associated protein 1 isoform X1 [Homo sapiens] ;gi|578803513|ref|XP_006712264.1|:NCKAP1:PREDICTED: nck-associated protein 1 isoform X2 [Homo sapiens] ;gi|7305303|ref|NP_038464.1|:NCKAP1:nck-associated protein 1 isoform 1 [Homo sapiens] ;	5.00978	0.00132119	0.00087687	0.00058245	0.00055325	0.00062102	0.000658397	24	22	18	20	21	0.00027634	3.021e-05	5.341e-05	0.00016573	0.000131422	15	1	2	5	5.75
EDF1	1 genes:EDF1.gi|24497601|ref|NP_694880.1|:EDF1:endothelial differentiation-related factor 1 isoform beta [Homo sapiens] ;gi|4503453|ref|NP_003783.1|:EDF1:endothelial differentiation-related factor 1 isoform alpha [Homo sapiens] ;gi|526253086|ref|NP_001268226.1|:EDF1:endothelial differentiation-related factor 1 isoform 3 [Homo sapiens] ;gi|526253088|ref|NP_001268227.1|:EDF1:endothelial differentia…	5.00871	0.0322797	0.00119229	0.00367181	0.00100302	0.00253322	0.00210008	4	17	4	10	8.75	0.00030059	0.00073939	0.00021788	0	0.000419287	2	3	1	0	1.5
ANKS1A	1 genes:ANKS1A. 1 proteins in this group did not match any genes. gi|140161500|ref|NP_056060.2|:ANKS1A:ankyrin repeat and SAM domain-containing protein 1A [Homo sapiens] ;gi|578811535|ref|XP_006715101.1|:PREDICTED: ankyrin repeat and SAM domain-containing protein 1A isoform X8 [Homo sapiens] ;	4.99097	0.0125135	0.00047497	0.00018532	0.00061472	0.00037261	0.000411905	13	7	20	12	13	0.00018423	3.021e-05	0	3.315e-05	8.253e-05	10	1	0	1	3
PCMT1	1 genes:PCMT1.gi|354983493|ref|NP_001238978.1|:PCMT1:protein-L-isoaspartate(D-aspartate) O-methyltransferase isoform 2 [Homo sapiens] ;gi|354983501|ref|NP_001238982.1|:PCMT1:protein-L-isoaspartate(D-aspartate) O-methyltransferase isoform 1 [Homo sapiens] ;	4.95648	0.00149999	0.0040563	0.00209947	0.00365611	0.00443224	0.00356103	28	20	30	36	28.5	0.00087655	0.00059892	0.00074124	0.00065713	0.00071846	12	5	7	5	7.25
OCIAD1	1 genes:OCIAD1. 3 proteins in this group did not match any genes. gi|119874209|ref|NP_001073310.1|:OCIAD1:OCIA domain-containing protein 1 isoform 3 [Homo sapiens] ;gi|269914128|ref|NP_001161726.1|:OCIAD1:OCIA domain-containing protein 1 isoform 4 [Homo sapiens] ;gi|269954666|ref|NP_001073311.2|:OCIAD1:OCIA domain-containing protein 1 isoform 2 [Homo sapiens] ;gi|530376684|ref|XP_005248170.1|:PRE…	4.94829	0.00126611	0.00044313	0.00064219	0.00037278	0.00075319	0.000552822	2	4	2	4	3	0.00011172	0	0	0	0.00011172	1	0	0	0	0.25
NAP1L4	nucleosome assembly protein 1-like 4 [Homo sapiens]	4.91385	0.000558294	0.00149968	0.00116909	0.00146441	0.0008779	0.00125277	13.5735	14.6027	15.7554	9.34951	13.3203	0.00029754	0.00021156	0.00025574	0	0.000254947	5.34091	2.31579	3.16667	0	2.70584
FHL1	1 genes:FHL1.gi|228480205|ref|NP_001153171.1|:FHL1:four and a half LIM domains protein 1 isoform 5 [Homo sapiens] ;gi|228480209|ref|NP_001153173.1|:FHL1:four and a half LIM domains protein 1 isoform 3 precursor [Homo sapiens] ;gi|578838653|ref|XP_006724810.1|:FHL1:PREDICTED: four and a half LIM domains protein 1 isoform X5 [Homo sapiens] ;	4.7911	0.0195567	0.00377929	0.00243426	0.00188405	0.0014275	0.00238127	27	24	16	12	19.75	0.00141157	0.00034721	0.00010231	0.00012699	0.00049702	20	3	1	1	6.25
HSPH1	heat shock protein 105 kDa isoform 1 [Homo sapiens]	4.72936	0.00126195	0.00019316	0.00030992	0.00032499	0.0002052	0.000258317	4	8.85714	8	5	6.46429	4.87e-05	7.986e-05	3.53e-05	0	5.462e-05	2	2	1	0	1.25
CAPZB	F-actin-capping protein subunit beta isoform 1 [Homo sapiens]	4.72101	0.0200776	0.00068546	0.00242829	0.00115329	0.00155346	0.00145512	4.5	22	9	12	11.875	0.00057604	0.00012595	0.00022268	0	0.000308223	7.5	1	2	0	2.625
RPS6KB1	1 genes:RPS6KB1.gi|440546395|ref|NP_001258971.1|:RPS6KB1:ribosomal protein S6 kinase beta-1 isoform b [Homo sapiens] ;gi|440546397|ref|NP_001258972.1|:RPS6KB1:ribosomal protein S6 kinase beta-1 isoform c [Homo sapiens] ;gi|440546399|ref|NP_001258973.1|:RPS6KB1:ribosomal protein S6 kinase beta-1 isoform d [Homo sapiens] ;gi|440546416|ref|NP_001258989.1|:RPS6KB1:ribosomal protein S6 kinase beta-1 i…	4.71723	0.00368364	0.00049521	0.00023922	0.00055546	0.00028057	0.000392615	6	4	8	4	5.5	8.323e-05	0	0	0	8.323e-05	2	0	0	0	0.5
PSME1	1 genes:PSME1.gi|528078355|ref|NP_001268458.1|:PSME1:proteasome activator complex subunit 1 isoform 4 [Homo sapiens] ;gi|5453990|ref|NP_006254.1|:PSME1:proteasome activator complex subunit 1 isoform 1 [Homo sapiens] ;	4.68188	0.0106596	0.0008778	0.00139935	0.00059076	0.00044761	0.00082888	5	11	4	3	5.75	0.00017704	0	0	0	0.00017704	2	0	0	0	0.5
LSM12	protein LSM12 homolog [Homo sapiens]	4.67489	0.0206516	0.00191226	0.00076981	0.00071497	0.00090286	0.00107497	9	5	4	5	5.75	0.0003214	0.00017568	0	0.00019276	0.000229947	3	1	0	1	1.25
NMT1	glycylpeptide N-tetradecanoyltransferase 1 [Homo sapiens]	4.63944	0.00640778	0.00058473	0.00027238	0.00070272	0.00035496	0.000478697	7	4.5	10	5	6.625	8.424e-05	0	0.00012212	0	0.00010318	2	0	2	0	1
FCHO2	FCH domain only protein 2 isoform a [Homo sapiens]	4.62889	0.00261373	0.00051151	0.00037065	0.00021515	0.00047818	0.000393872	10	10	5	11	9	7.737e-05	0	0	9.281e-05	8.509e-05	3	0	0	2	1.25
PPP1R7	1 genes:PPP1R7.gi|4506013|ref|NP_002703.1|:PPP1R7:protein phosphatase 1 regulatory subunit 7 isoform 1 [Homo sapiens] ;gi|539845980|ref|NP_001269342.1|:PPP1R7:protein phosphatase 1 regulatory subunit 7 isoform 6 [Homo sapiens] ;gi|539846291|ref|NP_001269343.1|:PPP1R7:protein phosphatase 1 regulatory subunit 7 isoform 7 [Homo sapiens] ;gi|540344563|ref|NP_001269338.1|:PPP1R7:protein phosphatase 1 …	4.60156	0.00126162	0.00069054	0.00066717	0.00038728	0.00039124	0.000534058	6	8	4	4	5.5	0.00011606	0	0	0	0.00011606	2	0	0	0	0.5
PAIP1	1 genes:PAIP1.gi|17511255|ref|NP_006442.2|:PAIP1:polyadenylate-binding protein-interacting protein 1 isoform 1 [Homo sapiens] ;gi|33386693|ref|NP_877590.1|:PAIP1:polyadenylate-binding protein-interacting protein 1 isoform 2 [Homo sapiens] ;gi|530378660|ref|XP_005248287.1|:PAIP1:PREDICTED: polyadenylate-binding protein-interacting protein 1 isoform X1 [Homo sapiens] ;	4.5767	0.0217596	0.00017299	0.00018803	0.00036383	7.351e-05	0.00019959	2	3	5	1	2.75	4.361e-05	0	0	0	4.361e-05	1	0	0	0	0.25
SEPT6	septin-6 isoform B [Homo sapiens]	4.54266	0.0238006	0.0009106	0.00045231	0.00026928	0.00029208	0.000481068	9.53846	6.53846	3.35294	3.6	5.75747	0.0001059	0	0	0	0.0001059	2.2	0	0	0	0.55
COPZ1	1 genes:COPZ1.gi|414144870|ref|NP_001258665.1|:COPZ1:coatomer subunit zeta-1 isoform 4 [Homo sapiens] ;gi|7706337|ref|NP_057141.1|:COPZ1:coatomer subunit zeta-1 isoform 1 [Homo sapiens] ;	4.53896	0.000331357	0.00067187	0.0009737	0.00056521	0.00076133	0.000743028	3	6	3	4	4	0	0	0.0001637	0	0.0001637	0	0	1	0	0.25
NDC80	kinetochore protein NDC80 homolog [Homo sapiens]	4.53373	0.00850803	0.00025814	0.00074822	0.00038004	0.00038393	0.000442582	4	16	7	7	8.5	9.762e-05	0	0	0	9.762e-05	3	0	0	0	0.75
DPYSL5	dihydropyrimidinase-related protein 5 [Homo sapiens]	4.51973	0.000628658	0.00088154	0.00053231	0.00061799	0.00068675	0.000679647	12	10	10	11	10.75	0.00022225	0.00012148	0.00010739	0	0.000150373	6	2	2	0	2.5
LUZP1	leucine zipper protein 1 [Homo sapiens]	4.37713	7.97564e-05	0.00115517	0.00108818	0.00149008	0.00140716	0.00128515	30	39	46	43	39.5	0.0002524	0.00031838	0.00039404	0.0002096	0.000293605	13	10	14	6	10.75
MAGI3	1 genes:MAGI3.gi|218505835|ref|NP_001136254.1|:MAGI3:membrane-associated guanylate kinase, WW and PDZ domain-containing protein 3 isoform 1 [Homo sapiens] ;gi|530362355|ref|XP_005270794.1|:MAGI3:PREDICTED: membrane-associated guanylate kinase, WW and PDZ domain-containing protein 3 isoform X2 [Homo sapiens] ;	4.34354	0.0144437	0.00016785	4.054e-05	9.414e-05	0.00011888	0.000105352	6	2	4	5	4.25	0	2.313e-05	0	2.538e-05	2.4255e-05	0	1	0	1	0.5
IBTK	1 genes:IBTK.gi|57863304|ref|NP_056340.2|:IBTK:inhibitor of Bruton tyrosine kinase [Homo sapiens] ;gi|578812674|ref|XP_006715516.1|:IBTK:PREDICTED: inhibitor of Bruton tyrosine kinase isoform X1 [Homo sapiens] ;	4.32055	0.00127667	0.00085743	0.00057693	0.00054099	0.0005205	0.000623962	28	26	21	20	23.75	0.00013897	7.596e-05	0.00022384	0.0001389	0.000144417	9	3	10	5	6.75
ARFGAP2	ADP-ribosylation factor GTPase-activating protein 2 isoform 1 [Homo sapiens]	4.31392	0.000769939	0.00111334	0.00074912	0.000669	0.00094619	0.000869413	14	13	10	14	12.75	0.00024059	0.00013151	0.00023251	0	0.000201537	6	2	4	0	3
AAK1	AP2-associated protein kinase 1 [Homo sapiens]	4.29874	0.00126521	0.0003018	0.00034365	0.00025389	0.00043969	0.000334757	7	11	7	12	9.25	2.174e-05	0	9.454e-05	0.00011734	7.78733e-05	1	0	3	3	1.75
CNN3	calponin-3 isoform 1 [Homo sapiens]	4.26846	0.00227468	0.00402988	0.00453082	0.0037553	0.00278269	0.00377467	32	49.6508	35.4468	26	35.7744	0.00209547	0.00093715	0.00027615	0.0002285	0.000884317	33	9	3	2	11.75
CIAPIN1	anamorsin [Homo sapiens]	4.25829	0.000135287	0.00345268	0.00250187	0.00256943	0.00327288	0.00294922	26	26	23	29	26	0.00093743	0.00076861	0.0005824	0.00048189	0.000692582	14	7	6	4	7.75
MICALL1	1 genes:MICALL1. 1 proteins in this group did not match any genes. gi|31324577|ref|NP_203744.1|:MICALL1:MICAL-like protein 1 [Homo sapiens] ;gi|530420479|ref|XP_005261848.1|:MICALL1:PREDICTED: MICAL-like protein 1 isoform X1 [Homo sapiens] ;gi|530420481|ref|XP_005261849.1|:MICALL1:PREDICTED: MICAL-like protein 1 isoform X2 [Homo sapiens] ;gi|578837458|ref|XP_006724408.1|:PREDICTED: MICAL-like pro…	4.25285	0.0106842	0.00043209	0.00041746	0.00020194	0.00016321	0.000303675	9	12	5	4	7.5	7.262e-05	0	7.019e-05	0	7.1405e-05	3	0	2	0	1.25
CARD8	1 genes:CARD8.gi|578834144|ref|XP_006723156.1|:CARD8:PREDICTED: caspase recruitment domain-containing protein 8 isoform X3 [Homo sapiens] ;gi|578834146|ref|XP_006723157.1|:CARD8:PREDICTED: caspase recruitment domain-containing protein 8 isoform X4 [Homo sapiens] ;	4.21412	0.000564025	0.00115732	0.00162133	0.00162267	0.00118028	0.0013954	15	29	25	18	21.75	0.00058355	0.00031898	0.00028198	0.00013999	0.000331125	15	5	5	2	6.75
CD2AP	1 genes:CD2AP. 1 proteins in this group did not match any genes. gi|11321634|ref|NP_036252.1|:CD2AP:CD2-associated protein [Homo sapiens] ;gi|530381720|ref|XP_005249033.1|:CD2AP:PREDICTED: CD2-associated protein isoform X1 [Homo sapiens] ;gi|530381722|ref|XP_005249034.1|:PREDICTED: CD2-associated protein isoform X2 [Homo sapiens] ;	4.20609	0.000374395	0.00285292	0.00220823	0.00354549	0.00347158	0.00301956	44	47	65	63	54.75	0.00088273	0.00053612	0.0008057	0.00064705	0.0007179	27	10	17	11	16.25
PTPN23	1 genes:PTPN23. 1 proteins in this group did not match any genes. gi|24308073|ref|NP_056281.1|:PTPN23:tyrosine-protein phosphatase non-receptor type 23 [Homo sapiens] ;gi|530372233|ref|XP_005265088.1|:PREDICTED: tyrosine-protein phosphatase non-receptor type 23 isoform X1 [Homo sapiens] ;	4.18241	0.000703339	0.00027858	0.00025692	0.00038349	0.00032285	0.00031046	11	14	18	15	14.5	0.0001277	2.094e-05	7.405e-05	0	7.423e-05	10	1	4	0	3.75
CAPZA1	F-actin-capping protein subunit alpha-1 [Homo sapiens]	4.17754	0.026626	0.00344923	0.00111972	0.00200215	0.00147741	0.00201213	23.8095	10.6667	16.4286	12	15.7262	0.00106109	0	0.00012102	0.00026285	0.000481653	14.5263	0	1.14286	2	4.41729
CDV3	1 genes:CDV3.gi|530374895|ref|XP_005247645.1|:CDV3:PREDICTED: protein CDV3 homolog isoform X1 [Homo sapiens] ;gi|8923710|ref|NP_060018.1|:CDV3:protein CDV3 homolog isoform b [Homo sapiens] ;	4.12801	0.00604344	0.0015997	0.00104325	0.00067287	0.00067976	0.000998895	10	9	5	5	7.25	0.00024198	0	0	0	0.00024198	3	0	0	0	0.75
FPGS	1 genes:FPGS.gi|530390857|ref|XP_005251921.1|:FPGS:PREDICTED: folylpolyglutamate synthase, mitochondrial isoform X2 [Homo sapiens] ;gi|571330788|ref|NP_001275732.1|:FPGS:folylpolyglutamate synthase, mitochondrial isoform c precursor [Homo sapiens] ;gi|66932984|ref|NP_004948.4|:FPGS:folylpolyglutamate synthase, mitochondrial isoform a precursor [Homo sapiens] ;gi|66932990|ref|NP_001018088.1|:FPGS:…	4.12072	0.00205683	0.00074578	0.0005404	0.00034855	0.00049296	0.000531922	9	9	5	7	7.5	0	0.00013703	0.00012114	0	0.000129085	0	2	2	0	1
FXR2	fragile X mental retardation syndrome-related protein 2 [Homo sapiens]	4.10035	0.00212419	0.00092345	0.00046076	0.0008004	0.00078481	0.000742355	15	10.3287	15.4545	15	13.9458	0.00021729	0	0.00027	5.585e-05	0.000181047	7	0	6	1	3.5
AVEN	cell death regulator Aven [Homo sapiens]	4.09526	0.000644125	0.00034336	0.00058055	0.00057771	0.00038908	0.000472675	3	7	6	4	5	0.00011542	0	0	0	0.00011542	2	0	0	0	0.5
NUDT5	ADP-sugar pyrophosphatase [Homo sapiens]	4.05215	0.000727583	0.00189188	0.00109671	0.00190986	0.00128627	0.00154618	10	8	12	8	9.5	0.00038157	0	0	0	0.00038157	4	0	0	0	1
NCDN	1 genes:NCDN.gi|62526029|ref|NP_001014839.1|:NCDN:neurochondrin isoform 1 [Homo sapiens] ;gi|62526031|ref|NP_001014841.1|:NCDN:neurochondrin isoform 2 [Homo sapiens] ;	4.02652	0.00511916	5.683e-05	0.00016473	0.00014344	9.66e-05	0.0001154	1	4	3	2	2.5	2.866e-05	0	0	0	2.866e-05	1	0	0	0	0.25
WASL	neural Wiskott-Aldrich syndrome protein [Homo sapiens]	4.01828	0.0121964	0.00106657	0.00053505	0.00075922	0.00041836	0.0006948	13	9	11	6	9.75	0.00033095	6.784e-05	0.00011994	0	0.00017291	8	1	2	0	2.75
TBK1	PREDICTED: serine/threonine-protein kinase TBK1 isoform X2 [Homo sapiens]	4.01334	0.00106912	0.00045467	0.00041183	0.00028687	0.00043471	0.00039702	8	10	6	9	8.25	0.00011463	0.00018797	4.154e-05	5.156e-05	9.8925e-05	4	4	1	1	2.5
ABL2	Abelson tyrosine-protein kinase 2 isoform f [Homo sapiens]	3.98945	0.00211168	8.922e-05	7.758e-05	0.00010508	0.00015164	0.00010588	2.5	3	3.5	5	3.5	2.699e-05	0	2.609e-05	0	2.654e-05	1.5	0	1	0	0.625
NUP43	nucleoporin Nup43 [Homo sapiens]	3.97735	0.0159348	0.00010903	0.00023702	0.00045862	0.00046331	0.000316995	1	3	5	5	3.5	0	0	7.97e-05	0	7.97e-05	0	0	1	0	0.25
ACTR3	actin-related protein 3 isoform 1 [Homo sapiens]	3.94784	0.0114749	0.00158592	0.00089381	0.00250155	0.00143206	0.00160333	16	12.4444	30	17	18.8611	0.00049979	0.0005737	0.0001449	0	0.00040613	10	7	2	0	4.75
CENPE	centromere-associated protein E isoform 1 [Homo sapiens]	3.91696	0.0498267	9.204e-05	1.112e-05	0.00014195	0.0001434	9.71275e-05	6	1	11	11	7.25	0	3.805e-05	2.242e-05	1.392e-05	2.47967e-05	0	3	2	1	1.5
TBCE	tubulin-specific chaperone E isoform a [Homo sapiens]	3.90973	0.0315131	0.00117928	0.00045575	0.00079366	0.00033408	0.000690692	15	8	12	5	10	0.00027749	0.00019502	5.747e-05	0	0.00017666	7	3	1	0	2.75
SERBP1	plasminogen activator inhibitor 1 RNA-binding protein isoform 1 [Homo sapiens]	3.90172	0.000448281	0.00192944	0.00309055	0.00307543	0.0025891	0.00267113	19	42	36	30	31.75	0.00092167	0.0005038	0.00066805	0.00064489	0.000684602	18	6	9	7	10
VCL	1 genes:VCL. 2 proteins in this group did not match any genes. gi|4507877|ref|NP_003364.1|:VCL:vinculin isoform VCL [Homo sapiens] ;gi|530394328|ref|XP_005270199.1|:PREDICTED: vinculin isoform X1 [Homo sapiens] ;gi|530394330|ref|XP_005270200.1|:PREDICTED: vinculin isoform X2 [Homo sapiens] ;gi|7669550|ref|NP_054706.1|:VCL:vinculin isoform meta-VCL [Homo sapiens] ;	3.87272	0.000618947	0.0002332	0.00014082	0.00019618	0.00023122	0.000200355	6	5	6	7	6	3.92e-05	6.427e-05	0	0	5.1735e-05	2	2	0	0	1
CHORDC1	cysteine and histidine-rich domain-containing protein 1 isoform a [Homo sapiens]	3.86893	0.000851691	0.00224632	0.00307459	0.00346449	0.0033939	0.00304483	18	34	33	32	29.25	0.00069218	0.00061912	0.00036488	0.0014718	0.000786995	11	6	4	13	8.5
ZNF598	zinc finger protein 598 [Homo sapiens]	3.8424	0.00573826	0.00087081	0.00039853	0.00050123	0.00070112	0.000617922	19	12	13	18	15.5	9.244e-05	0.00026527	0	0.00012474	0.000160817	4	7	0	3	3.5
PDCL3	phosducin-like protein 3 [Homo sapiens]	3.84148	0.00240812	0.00173356	0.00226111	0.00116669	0.00147329	0.00165866	10	18	8	10	11.5	0.00061188	0.00043002	0.00025343	0	0.000431777	7	3	2	0	3
C1orf198	uncharacterized protein C1orf198 isoform 1 [Homo sapiens]	3.8359	0.00173652	0.00139374	0.0015608	0.00085272	0.00107681	0.00122102	11	17	8	10	11.5	0.00044721	0	0.00027784	0.00022989	0.000318313	7	0	3	2	3
ENAH	1 genes:ENAH. 5 proteins in this group did not match any genes. gi|39930375|ref|NP_060682.2|:ENAH:protein enabled homolog isoform b [Homo sapiens] ;gi|530366308|ref|XP_005273239.1|:PREDICTED: protein enabled homolog isoform X2 [Homo sapiens] ;gi|530366318|ref|XP_005273244.1|:ENAH:PREDICTED: protein enabled homolog isoform X7 [Homo sapiens] ;gi|530366320|ref|XP_005273245.1|:PREDICTED: protein enab…	3.82313	0.00629672	0.00072688	0.00047404	0.00110068	0.00067952	0.00074528	10	9	18	11	12	0.00018326	0.0001202	0.00021253	0.00026377	0.00019494	5	2	4	4	3.75
SEPT8	septin-8 isoform c [Homo sapiens]	3.80753	0.0120789	0.00084364	0.00043666	0.00033295	0.00055765	0.000542725	9	6.42857	4.22222	7	6.6627	0.00010398	0	6.852e-05	0.00025512	0.00014254	2.2	0	1	3	1.55
PGAM1	phosphoglycerate mutase 1 [Homo sapiens]	3.79805	0.00355969	0.00195743	0.00118199	0.00096057	0.00124766	0.00133691	12	10	7	9	9.5	0.0001645	0.0005395	0	0	0.000352	2	4	0	0	1.5
DPYSL2	dihydropyrimidinase-related protein 2 isoform 1 [Homo sapiens]	3.79733	0.000599195	0.00246138	0.00316586	0.00286579	0.00241628	0.00272733	40.2188	71.3895	55.6634	46.4567	53.4321	0.00145616	0.00039102	0.00058154	0.00044417	0.000718222	47.1884	7.72727	13	8	18.9789
DIS3L	1 genes:DIS3L. 1 proteins in this group did not match any genes. gi|219521928|ref|NP_001137160.1|:DIS3L:DIS3-like exonuclease 1 isoform 1 [Homo sapiens] ;gi|530405353|ref|XP_005254201.1|:PREDICTED: DIS3-like exonuclease 1 isoform X1 [Homo sapiens] ;	3.77606	0.00378932	0.00113997	0.00074059	0.00059525	0.00073497	0.000802695	29	26	18	22	23.75	0.00039642	0	2.873e-05	0	0.000212575	20	0	1	0	5.25
DOCK4	1 genes:DOCK4.gi|578814791|ref|XP_006716251.1|:DOCK4:PREDICTED: dedicator of cytokinesis protein 4 isoform X1 [Homo sapiens] ;gi|578814793|ref|XP_006716252.1|:DOCK4:PREDICTED: dedicator of cytokinesis protein 4 isoform X2 [Homo sapiens] ;gi|92091572|ref|NP_055520.3|:DOCK4:dedicator of cytokinesis protein 4 [Homo sapiens] ;	3.72969	0.0476645	0.0001888	9.121e-05	3.53e-05	7.131e-05	9.6655e-05	9	6	2	4	5.25	2.116e-05	0	3.067e-05	0	2.5915e-05	2	0	2	0	1
KATNB1	katanin p80 WD40 repeat-containing subunit B1 [Homo sapiens]	3.72609	0.016446	6.326e-05	9.167e-05	0.00021285	0.00010752	0.000118825	1	2	4	2	2.25	3.189e-05	0	0	0	3.189e-05	1	0	0	0	0.25
RRM2	ribonucleoside-diphosphate reductase subunit M2 isoform 1 [Homo sapiens]	3.71161	4.6334e-05	0.00101504	0.00103223	0.00108679	0.00094107	0.00101878	11	15.4375	14	12	13.1094	0.00027917	0	0.0002698	0	0.000274485	6	0	4	0	2.5
CEP192	centrosomal protein of 192 kDa [Homo sapiens]	3.68332	0.00189265	0.00017964	0.00034318	0.00032973	0.00027759	0.000282535	11	29	24	20	21	9.47e-05	0	8.356e-05	5.186e-05	7.67067e-05	11.5	0	7	3.5	5.5
DPYSL3	dihydropyrimidinase-related protein 3 isoform 1 [Homo sapiens]	3.68242	0.00303831	0.00156166	0.00268905	0.00159551	0.00172414	0.00189259	25.7812	61.2644	31.3106	33.492	37.9621	0.0008189	0.00046443	0.00044276	0.00032972	0.000513952	26.8116	9.27273	10	6	13.0211
ASAP1	1 genes:ASAP1.gi|351542238|ref|NP_001234925.1|:ASAP1:arf-GAP with SH3 domain, ANK repeat and PH domain-containing protein 1 isoform 2 [Homo sapiens] ;gi|46094081|ref|NP_060952.2|:ASAP1:arf-GAP with SH3 domain, ANK repeat and PH domain-containing protein 1 isoform 1 [Homo sapiens] ;gi|578815980|ref|XP_006716626.1|:ASAP1:PREDICTED: arf-GAP with SH3 domain, ANK repeat and PH domain-containing protei…	3.6772	0.00965382	0.00022156	0.00016055	0.00018639	0.00034521	0.000228427	6	6	6	11	7.25	3.724e-05	0.00012213	2.699e-05	0	6.212e-05	2	4	1	0	1.75
HBS1L	HBS1-like protein isoform 3 [Homo sapiens]	3.61867	1.18549e-06	0.00296121	0.00289409	0.00269448	0.00279885	0.00283716	45.1698	60.9231	48.8571	50.2353	51.2963	0.00099167	0.0008673	0.00062295	0.00065421	0.000784033	30	16	13	11	17.5
BSDC1	1 genes:BSDC1. 1 proteins in this group did not match any genes. gi|221316578|ref|NP_060515.3|:BSDC1:BSD domain-containing protein 1 isoform b [Homo sapiens] ;gi|221316581|ref|NP_001137360.1|:BSDC1:BSD domain-containing protein 1 isoform a [Homo sapiens] ;gi|530362879|ref|XP_005271042.1|:PREDICTED: BSD domain-containing protein 1 isoform X1 [Homo sapiens] ;gi|530362881|ref|XP_005271043.1|:BSDC1:P…	3.61259	0.0214152	9.635e-05	0.00048874	0.00056741	0.00040944	0.000390485	1	7	7	5	5	0.00014575	0	7.043e-05	0	0.00010809	3	0	1	0	1
CRTC1	1 genes:CRTC1.gi|148596965|ref|NP_056136.2|:CRTC1:CREB-regulated transcription coactivator 1 isoform 1 [Homo sapiens] ;gi|148596988|ref|NP_001091952.1|:CRTC1:CREB-regulated transcription coactivator 1 isoform 3 [Homo sapiens] ;gi|530414691|ref|XP_005259890.1|:CRTC1:PREDICTED: CREB-regulated transcription coactivator 1 isoform X1 [Homo sapiens] ;gi|530414693|ref|XP_005259891.1|:CRTC1:PREDICTED: CR…	3.60577	0.0198202	6.535e-05	0.00018942	0.00016493	5.554e-05	0.00011881	1	4	3	1	2.25	3.295e-05	0	0	0	3.295e-05	1	0	0	0	0.25
CSDE1	cold shock domain-containing protein E1 isoform 4 [Homo sapiens]	3.60428	0.021467	0.00073635	0.00094265	0.00094984	0.00200256	0.00115785	15	26.5	23	48	28.125	0	0.00032472	0.000305	0.00033401	0.000321243	0	8	8.5	7.5	6
CCDC85C	coiled-coil domain-containing protein 85C [Homo sapiens]	3.59823	0.00554494	0.0005933	0.00071653	0.00041593	0.00092441	0.000662543	6	10	5	11	8	0.00029916	0.00016352	0	8.971e-05	0.00018413	6	2	0	1	2.25
EIF2A	eukaryotic translation initiation factor 2A [Homo sapiens]	3.58688	1.45054e-05	0.00063742	0.00066717	0.00065539	0.00060191	0.000640472	9	13	11	10	10.75	0.00017856	0	0	0	0.00017856	5	0	0	0	1.25
DDX3X	ATP-dependent RNA helicase DDX3X isoform 2 [Homo sapiens]	3.57926	9.00373e-06	0.0119721	0.0140618	0.0121597	0.0112262	0.0123549	191	309.597	230.6	210.739	235.484	0.0041019	0.00338051	0.00327689	0.00304795	0.00345181	129.785	65.2258	71.5217	53.6	80.033
RPP25L	ribonuclease P protein subunit p25-like protein [Homo sapiens]	3.5663	0.0309707	0.00101674	0.00110512	0.0006415	0.00021602	0.000744845	4	6	3	1	3.5	0	0.00021017	0.0001858	0.0002306	0.000208857	0	1	1	1	0.75
SUGT1	suppressor of G2 allele of SKP1 homolog isoform SGT1B [Homo sapiens]	3.55247	0.023558	0.00249728	0.00090479	0.00143239	0.00106117	0.00147391	22	11	15	11	14.75	0.00068683	0	0.00024892	0.00030894	0.000414897	12	0	3	3	4.5
ARFIP2	1 genes:ARFIP2.gi|338827746|ref|NP_001229783.1|:ARFIP2:arfaptin-2 isoform 1 [Homo sapiens] ;gi|338827748|ref|NP_001229784.1|:ARFIP2:arfaptin-2 isoform 3 [Homo sapiens] ;gi|530395177|ref|XP_005252897.1|:ARFIP2:PREDICTED: arfaptin-2 isoform X1 [Homo sapiens] ;	3.52683	0.0243812	0.00044313	0.00040137	0.00111834	0.00084734	0.000702545	4	5	12	9	7.5	0.00033515	0	0.00016195	0.0001005	0.0001992	6	0	2	1	2.25
EIF4H	1 genes:EIF4H.gi|11559923|ref|NP_071496.1|:EIF4H:eukaryotic translation initiation factor 4H isoform 1 [Homo sapiens] ;gi|14702180|ref|NP_114381.1|:EIF4H:eukaryotic translation initiation factor 4H isoform 2 [Homo sapiens] ;	3.52635	0.00605387	0.00100239	0.00121058	0.00056218	0.00099388	0.000942257	6	10	4	7	6.75	0.00050543	0.00013814	0.00012212	0.00030313	0.000267205	6	1	1	2	2.5
PATL1	1 genes:PATL1.gi|189217919|ref|NP_689929.2|:PATL1:protein PAT1 homolog 1 [Homo sapiens] ;gi|530396446|ref|XP_005273890.1|:PATL1:PREDICTED: protein PAT1 homolog 1 isoform X1 [Homo sapiens] ;gi|530396448|ref|XP_005273891.1|:PATL1:PREDICTED: protein PAT1 homolog 1 isoform X2 [Homo sapiens] ;	3.52343	0.0249701	0.00026904	0.00011697	0.00018106	9.146e-05	0.000164633	5	3	4	2	3.5	5.426e-05	4.449e-05	3.933e-05	4.882e-05	4.6725e-05	2	1	1	1	1.25
TAB1	TGF-beta-activated kinase 1 and MAP3K7-binding protein 1 isoform alpha [Homo sapiens]	3.51833	0.0016302	0.00394592	0.00291885	0.0020747	0.00307404	0.00300338	48	49	30	44	42.75	0.00082902	0.00108756	0.00090134	0.00059663	0.000853637	20	16	15	8	14.75
EIF4ENIF1	1 genes:EIF4ENIF1. 2 proteins in this group did not match any genes. gi|256818796|ref|NP_001157973.1|:EIF4ENIF1:eukaryotic translation initiation factor 4E transporter isoform a [Homo sapiens] ;gi|530420262|ref|XP_005261745.1|:EIF4ENIF1:PREDICTED: eukaryotic translation initiation factor 4E transporter isoform X3 [Homo sapiens] ;gi|578837305|ref|XP_006724344.1|:PREDICTED: eukaryotic translation i…	3.51156	0.0332148	0.00012619	9.144e-05	0.00017693	0.00028598	0.000170135	3	3	5	8	4.75	2.121e-05	3.478e-05	6.149e-05	7.632e-05	4.845e-05	1	1	2	2	1.5
TJP1	PREDICTED: tight junction protein ZO-1 isoform X3 [Homo sapiens]	3.50896	1.28396e-06	0.00129222	0.00120096	0.00136672	0.00130487	0.00129119	55.2667	70.8833	69.4833	65.6667	65.325	0.00043071	0.00027711	0.00035891	0.00040515	0.00036797	36.5333	14.3333	21	19.1	22.7417
RPAP3	RNA polymerase II-associated protein 3 isoform 1 [Homo sapiens]	3.50679	0.0150883	0.00137069	0.00058691	0.00068137	0.00132375	0.00099068	22	13	13	25	18.25	0.00047123	0.00010303	0.00027325	0	0.000282503	15	2	6	0	5.75
TJP1	tight junction protein ZO-1 isoform a [Homo sapiens]	3.50407	1.84157e-06	0.00130997	0.00118739	0.00137053	0.00132279	0.00129767	55.2667	69.1333	68.7333	65.6667	64.7	0.00043663	0.00028091	0.00036383	0.00039996	0.000370332	36.5333	14.3333	21	18.6	22.6167
MLLT4	PREDICTED: afadin isoform X5 [Homo sapiens]	3.48708	0.000232824	0.00049432	0.00034584	0.00048277	0.00051668	0.000459902	21.75	21	25.25	26.75	23.6875	0.00018049	0.00010806	0.00012044	0.00011856	0.000131888	15.75	5.75	7.25	5.75	8.625
TJP1	PREDICTED: tight junction protein ZO-1 isoform X5 [Homo sapiens]	3.47589	6.6416e-07	0.00125359	0.00123255	0.00135348	0.00127404	0.00127841	53.1	72.05	68.15	63.5	64.2	0.00040711	0.00027328	0.00037101	0.00041978	0.000367795	34.2	14	21.5	19.6	22.325
CAMSAP2	1 genes:CAMSAP2. 1 proteins in this group did not match any genes. gi|44955929|ref|NP_982284.1|:CAMSAP2:calmodulin-regulated spectrin-associated protein 2 [Homo sapiens] ;gi|530364464|ref|XP_005245097.1|:PREDICTED: calmodulin-regulated spectrin-associated protein 2 isoform X1 [Homo sapiens] ;	3.46936	0.00261515	0.00030836	0.00054845	0.00042448	0.0005956	0.000469222	11	27	18	25	20.25	0.00016962	0.00016225	8.196e-05	0.00012716	0.000135247	12	7	4	5	7
PPP2R5D	serine/threonine-protein phosphatase 2A 56 kDa regulatory subunit delta isoform isoform 1 [Homo sapiens]	3.45843	0.0289829	0.00063908	0.0003491	0.00043424	0.00031195	0.000433593	9.28571	7	7.5	5.33333	7.27976	0.00036305	5.691e-05	5.031e-05	3.122e-05	0.000125373	10.4615	1	1	0.5	3.24038
EIF3G	eukaryotic translation initiation factor 3 subunit G [Homo sapiens]	3.45455	0.00130814	0.00090633	0.0009382	0.00130706	0.00088029	0.00100797	7	10	12	8	9.25	0.00045699	0.00021411	0.00037856	0.00011746	0.00029178	7	2	4	1	3.5
CAMSAP1	1 genes:CAMSAP1.gi|186659512|ref|NP_056262.3|:CAMSAP1:calmodulin-regulated spectrin-associated protein 1 [Homo sapiens] ;gi|530426604|ref|XP_005263453.1|:CAMSAP1:PREDICTED: calmodulin-regulated spectrin-associated protein 1 isoform X1 [Homo sapiens] ;	3.44525	4.35354e-05	0.00093106	0.00103073	0.00117488	0.00123087	0.00109189	36	55	54	56	50.25	0.0003521	0.00025662	0.00028357	0.00037541	0.000316925	27	12	15	16	17.5
ITSN1	PREDICTED: intersectin-1 isoform X1 [Homo sapiens]	3.43839	0.0147023	0.00016901	5.249e-05	9.75e-05	9.12e-05	0.00010255	7	3	4.8	4.44444	4.81111	2.435e-05	0	3.53e-05	0	2.9825e-05	2	0	2	0	1
STAT3	signal transducer and activator of transcription 3 isoform 1 [Homo sapiens]	3.37469	0.0226985	0.00053808	0.00048738	0.00099585	0.00041157	0.00060822	10	12.5	22	9	13.375	0.00032558	0.00011123	0.00013766	0.00014645	0.00018023	12	2.5	3.5	3	5.25
NFATC3	1 genes:NFATC3.gi|27886555|ref|NP_775186.1|:NFATC3:nuclear factor of activated T-cells, cytoplasmic 3 isoform 3 [Homo sapiens] ;gi|27886561|ref|NP_775188.1|:NFATC3:nuclear factor of activated T-cells, cytoplasmic 3 isoform 1 [Homo sapiens] ;gi|4758804|ref|NP_004546.1|:NFATC3:nuclear factor of activated T-cells, cytoplasmic 3 isoform 2 [Homo sapiens] ;	3.36653	0.0104405	0.00027232	0.00011276	0.00026182	0.00013225	0.000194787	7	4	8	4	5.75	5.885e-05	0	5.687e-05	0	5.786e-05	3	0	2	0	1.25
FERMT2	1 genes:FERMT2.gi|201861813|ref|NP_001128471.1|:FERMT2:fermitin family homolog 2 isoform 2 [Homo sapiens] ;gi|201861823|ref|NP_001128472.1|:FERMT2:fermitin family homolog 2 isoform 3 [Homo sapiens] ;gi|29789006|ref|NP_006823.1|:FERMT2:fermitin family homolog 2 isoform 1 [Homo sapiens] ;gi|530402995|ref|XP_005267342.1|:FERMT2:PREDICTED: fermitin family homolog 2 isoform X1 [Homo sapiens] ;gi|57882…	3.35564	0.0288705	0.00042216	0.0001311	0.00030441	0.00051254	0.000342553	7	3	6	10	6.5	0.00012164	9.973e-05	0.00013225	5.471e-05	0.000102082	4	2	3	1	2.5
PIN4	peptidyl-prolyl cis-trans isomerase NIMA-interacting 4 isoform 1 [Homo sapiens]	3.35205	0.00204746	0.00053118	0.00076981	0.00044686	0.00045143	0.00054982	2	4	2	2	2.5	0.00013392	0	0.00019413	0	0.000164025	1	0	1	0	0.5
TBCB	1 genes:TBCB. 1 proteins in this group did not match any genes. gi|50428925|ref|NP_001272.2|:TBCB:tubulin-folding cofactor B [Homo sapiens] ;gi|578833911|ref|XP_006723061.1|:PREDICTED: tubulin-folding cofactor B isoform X1 [Homo sapiens] ;	3.32182	0.00314532	0.00220745	0.00159956	0.00142848	0.00230896	0.00188611	13	13	10	16	13	0.00051372	0.00098282	0.00062059	0.00015405	0.000567795	6	7	5	1	4.75
VAPB	vesicle-associated membrane protein-associated protein B/C isoform 1 [Homo sapiens]	3.32135	0.0484839	0.00119352	0.00037065	0.00043031	0.00028981	0.000571073	7	3	3	2	3.75	0.00017194	0	0	0	0.00017194	2	0	0	0	0.5
RAPH1	ras-associated and pleckstrin homology domains-containing protein 1 isoform 1 [Homo sapiens]	3.31447	0.0360797	3.315e-05	0.00012009	0.00015336	0.00011268	0.00010482	1	5	5.5	4	3.875	5.85e-05	1.37e-05	2.423e-05	3.007e-05	3.1625e-05	3.5	0.5	1	1	1.5
TAB2	PREDICTED: TGF-beta-activated kinase 1 and MAP3K7-binding protein 2 isoform X1 [Homo sapiens]	3.29279	0.00995882	0.00119573	0.00060651	0.00060355	0.00066054	0.000766582	20	14	12	13	14.75	0.00033161	0.0001483	0.00021851	0	0.000232807	11	3	5	0	4.75
MAP4K4	1 genes:MAP4K4. 5 proteins in this group did not match any genes. gi|530368853|ref|XP_005264101.1|:PREDICTED: mitogen-activated protein kinase kinase kinase kinase 4 isoform X1 [Homo sapiens] ;gi|530368855|ref|XP_005264102.1|:PREDICTED: mitogen-activated protein kinase kinase kinase kinase 4 isoform X2 [Homo sapiens] ;gi|530368857|ref|XP_005264103.1|:PREDICTED: mitogen-activated protein kinase ki…	3.29098	0.00861408	0.00011906	0.00015098	0.00017528	0.00025296	0.00017457	4	7	7	10	7	9.005e-05	2.461e-05	4.351e-05	5.401e-05	5.3045e-05	6	1	2	2	2.75
ARPC3	actin-related protein 2/3 complex subunit 3 isoform 1 [Homo sapiens]	3.28995	0.000565303	0.0006983	0.00101199	0.00058744	0.00079127	0.00077225	3	6	3	4	4	0.00023473	0	0	0	0.00023473	2	0	0	0	0.5
WRAP73	1 genes:WRAP73.gi|224586777|ref|NP_060288.3|:WRAP73:WD repeat-containing protein WRAP73 [Homo sapiens] ;gi|530360321|ref|XP_005244811.1|:WRAP73:PREDICTED: WD repeat-containing protein WRAP73 isoform X1 [Homo sapiens] ;	3.28377	0.00574615	0.00018014	0.00032633	0.00022731	0.00045928	0.000298265	2	5	3	6	4	9.083e-05	0	0	0	9.083e-05	2	0	0	0	0.5
EXOSC6	exosome complex component MTR3 [Homo sapiens]	3.26503	0.00696791	0.00091395	0.00176603	0.00115329	0.00090618	0.00118486	6	16	9	7	9.5	0.00061445	0	0.00011134	0	0.000362895	8	0	1	0	2.25
UBE2M	NEDD8-conjugating enzyme Ubc12 [Homo sapiens]	3.24854	0.0208516	0.00271687	0.00393737	0.00361882	0.00115448	0.00285688	12	24	19	6	15.25	0.0011416	0.00056161	0.00099295	0.00082159	0.000879438	10	3	6	4	5.75
WASF2	wiskott-Aldrich syndrome protein family member 2 isoform 1 [Homo sapiens]	3.2355	0.000689643	0.00058238	0.00061382	0.00083988	0.00070706	0.000685785	7	10.1818	12	10	9.79545	0.00020975	0.00027517	0	0.00015095	0.000211957	5	4	0	2	2.75
CLINT1	clathrin interactor 1 isoform 1 [Homo sapiens]	3.23034	0.00288802	0.0009021	0.00121397	0.00113834	0.00164285	0.00122432	14	26	21	30	22.75	0.00048735	0.00015984	0.00051809	0.00035074	0.000379005	15	3	11	6	8.75
TTF2	transcription termination factor 2 [Homo sapiens]	3.22379	0.000717824	0.00067746	0.0006976	0.0006899	0.00090908	0.00074351	19	27	23	30	24.75	0.00023372	0.00038327	0.0002085	9.704e-05	0.000230632	13	13	8	3	9.25
BAIAP2L1	brain-specific angiogenesis inhibitor 1-associated protein 2-like protein 1 [Homo sapiens]	3.21774	0.00643378	0.0004054	0.00023501	0.00013642	0.00027563	0.000263115	5	4	2	4	3.75	8.177e-05	0	0	0	8.177e-05	2	0	0	0	0.5
PCBP1	poly(rC)-binding protein 1 [Homo sapiens]	3.14999	0.00158139	0.00279318	0.00497564	0.00440582	0.00356073	0.00393384	24	59	45	36	41	0.00158444	0.00105854	0.00119098	0.00116141	0.00124884	27	11	14	11	15.75
NEURL4	1 genes:NEURL4.gi|53829368|ref|NP_001005408.1|:NEURL4:neuralized-like protein 4 isoform 2 [Homo sapiens] ;gi|53829370|ref|NP_115818.2|:NEURL4:neuralized-like protein 4 isoform 1 [Homo sapiens] ;	3.11245	0.00404744	7.968e-05	5.774e-05	4.469e-05	4.514e-05	5.68125e-05	3	3	2	2	2.5	1.339e-05	2.196e-05	1.941e-05	0	1.82533e-05	1	1	1	0	0.75
EXOSC7	exosome complex component RRP42 [Homo sapiens]	3.10436	0.0349494	0.00170854	0.00051585	0.00083843	0.00084702	0.00097746	12	5	7	7	7.75	0.00021537	0.0004709	0	0.00025833	0.000314867	3	4	0	2	2.25
TLN1	talin-1 [Homo sapiens]	3.07125	0.000749583	0.00097833	0.00115646	0.00152259	0.00109474	0.00118803	60	97.8788	111	79	86.9697	0.00052619	0.00029661	0.00036947	0.00035502	0.000386822	64	22	31	24	35.25
KIAA0355	PREDICTED: uncharacterized protein KIAA0355 isoform X1 [Homo sapiens]	3.06443	0.0166444	0.00030977	0.00056117	0.00029317	0.00026327	0.000356845	8	20	9	8	11.25	0.00017572	0.00012807	5.661e-05	0.00010539	0.000116448	9	4	2	3	4.5
PTPN14	tyrosine-protein phosphatase non-receptor type 14 [Homo sapiens]	3.06175	0.00201492	0.00020943	0.0003541	0.00026427	0.00023732	0.00026628	6	14	9	8	9.25	7.04e-05	8.658e-05	0.00012757	6.333e-05	8.697e-05	4	3	5	2	3.5
EIF2D	1 genes:EIF2D.gi|530432349|ref|XP_005277566.1|:EIF2D:PREDICTED: eukaryotic translation initiation factor 2D isoform X1 [Homo sapiens] ;gi|56699485|ref|NP_008824.2|:EIF2D:eukaryotic translation initiation factor 2D isoform 1 [Homo sapiens] ;	3.05555	0.0334142	0.0006983	0.00084333	0.00058744	0.00019782	0.000581723	9	15	9	3	9	0.00011737	0.00019246	0.00017014	0.00028156	0.000190382	3	3	3	4	3.25
KIAA1191	putative monooxygenase p33MONOX isoform b [Homo sapiens]	3.043	0.0393009	0.00130381	0.00062984	0.00048748	0.00024624	0.000666843	9	6	4	2	5.25	0.00021914	0	0	0	0.00021914	3	0	0	0	0.75
ZNF185	zinc finger protein 185 isoform 9 [Homo sapiens]	3.04078	0.00823014	0.00076022	0.00064268	0.00031977	0.00053841	0.00056527	6	7	3	5	5.25	0.00025555	0.00020953	9.261e-05	0	0.000185897	4	2	1	0	1.75
TAB3	PREDICTED: TGF-beta-activated kinase 1 and MAP3K7-binding protein 3 isoform X1 [Homo sapiens]	3.01726	0.0192802	0.00040734	0.00042166	0.00029372	9.891e-05	0.000305408	7	10	6	2	6.25	0.00011737	0	8.507e-05	0	0.00010122	4	0	2	0	1.5
MAPRE1	microtubule-associated protein RP/EB family member 1 [Homo sapiens]	3.01154	0.00481784	0.00154598	0.00179239	0.00247106	0.00289051	0.00217499	10	16	19	22	16.75	0.00101338	0	0.00045201	0.00070126	0.000722217	13	0	4	5	5.5
SASS6	spindle assembly abnormal protein 6 homolog [Homo sapiens]	3.00471	0.0149885	0.00018919	0.00036557	0.00042441	0.00021438	0.000298388	3	8	8	4	5.75	9.539e-05	0.00015643	4.61e-05	0	9.93067e-05	3	3	1	0	1.75
PCBP2	poly(rC)-binding protein 2 isoform b [Homo sapiens]	3.00222	0.00656452	0.00051504	0.00035247	0.00064992	0.00077816	0.000573898	4.5	4.25	6.75	8	5.875	0.00012985	0.00021293	0.00018823	0.00023362	0.000191157	2.25	2.25	2.25	2.25	2.25

## Sheet: CT HOOK1
				HOOK1-BioID										BioID control
				distributed normalized spectral abundance factor (dNSAF)					distributed Spectral Counts					distributed normalized spectral abundance factor (dNSAF)					distributed Spectral Counts
NCBI_Gene	Description	enrichment ratio	p-value	dNSAF 1	dNSAF 2	dNSAF 3	dNSAF 4	avg dNSAF	dSC 1	dSC 2	dSC 3	dSC 4	avg dSCs	dNSAF 1	dNSAF 2	dNSAF 3	dNSAF 4	avg dNSAF	dSC 1	dSC 2	dSC 3	dSC 4	avg dSCs
AP4E1	AP-4 complex subunit epsilon-1 isoform 1 [Homo sapiens]	∞	7.22271e-05	0.00101453	0.00081968	0.00132813	0.00123783	0.00110004	21	19	18	20	19.5	0	0	0	0	0	0	0	0	0	0
AP4M1	1 genes:AP4M1.gi|14917111|ref|NP_004713.2|:AP4M1:AP-4 complex subunit mu-1 [Homo sapiens] ;gi|530386618|ref|XP_005250746.1|:AP4M1:PREDICTED: AP-4 complex subunit mu-1 isoform X1 [Homo sapiens] ;gi|530386620|ref|XP_005250747.1|:AP4M1:PREDICTED: AP-4 complex subunit mu-1 isoform X2 [Homo sapiens] ;gi|578814740|ref|XP_006716238.1|:AP4M1:PREDICTED: AP-4 complex subunit mu-1 isoform X4 [Homo sapiens] ;	∞	0.00301851	0.00060629	0.00021656	0.00074078	0.00062137	0.00054625	5	2	4	4	3.75	0	0	0	0	0	0	0	0	0	0
CTIF	CBP80/20-dependent translation initiation factor isoform 1 [Homo sapiens]	∞	0.0252461	0.00059706	0	0.00049101	0.00052955	0.000539207	6.5	0	3.5	4.5	3.625	0	0	0	0	0	0	0	0	0	0
CTIF	PREDICTED: CBP80/20-dependent translation initiation factor isoform X8 [Homo sapiens]	∞	0.0256431	0.00059507	0.00163505	0.00048938	0.00052778	0.00081182	6.5	20	3.5	4.5	8.625	0	0	0	0	0	0	0	0	0	0
DBT	lipoamide acyltransferase component of branched-chain alpha-keto acid dehydrogenase complex, mitochondrial precursor [Homo sapiens]	∞	0.00321203	0.00125358	0.0006106	0.00052216	0.00116798	0.00088858	11	6	3	8	7	0	0	0	0	0	0	0	0	0	0
FAM160B1	1 genes:FAM160B1.gi|205277427|ref|NP_065991.3|:FAM160B1:protein FAM160B1 isoform a [Homo sapiens] ;gi|205277429|ref|NP_001128523.1|:FAM160B1:protein FAM160B1 isoform b [Homo sapiens] ;	∞	0.00944657	0.00035902	0.00025648	0.00087732	0.0007359	0.00055718	5	4	8	8	6.25	0	0	0	0	0	0	0	0	0	0
FAM160B2	protein FAM160B2 [Homo sapiens]	∞	1.1747e-07	0.00059144	0.00059416	0.00056456	0.00066298	0.000603285	8	9	5	7	7.25	0	0	0	0	0	0	0	0	0	0
KIAA0232	1 genes:KIAA0232. 1 proteins in this group did not match any genes. gi|154689866|ref|NP_001094060.1|:KIAA0232:uncharacterized protein KIAA0232 [Homo sapiens] ;gi|578808307|ref|XP_006713997.1|:PREDICTED: uncharacterized protein KIAA0232 isoform X2 [Homo sapiens] ;	∞	0.015803	3.938e-05	0.00017581	0.00030069	0.00020178	0.000179415	1	5	5	4	3.75	0	0	0	0	0	0	0	0	0	0
KIF1C	PREDICTED: kinesin-like protein KIF1C isoform X1 [Homo sapiens]	∞	0.0485018	0.0001641	0.00023686	0	0.00038034	0.000260433	3.29508	5.32609	0	5.96154	3.64568	0	0	0	0	0	0	0	0	0	0
KIF5C	kinesin heavy chain isoform 5C [Homo sapiens]	∞	0.0375747	0.00046738	0.00027606	0	0.00028051	0.000341317	8.14286	5.38587	0	3.81481	4.33588	0	0	0	0	0	0	0	0	0	0
KLC4	kinesin light chain 4 isoform b [Homo sapiens]	∞	0.00793249	0.00017246	0.00054603	0.0003951	0.00022094	0.000333633	2	7.09091	3	2	3.52273	0	0	0	0	0	0	0	0	0	0
PDZRN3	E3 ubiquitin-protein ligase PDZRN3 [Homo sapiens]	∞	5.98544e-05	0.00030917	0.00041413	0.0003148	0.0004621	0.00037505	6	9	4	7	6.5	0	0	0	0	0	0	0	0	0	0
RIMBP3	RIMS-binding protein 3A [Homo sapiens]	∞	0.0430715	0.00033514	0.00110732	0.00030711	0.00028981	0.000509845	10	37	6	6.75	14.9375	0	0	0	0	0	0	0	0	0	0
SUFU	suppressor of fused homolog isoform 1 [Homo sapiens]	∞	0.00319223	0.00034047	0.00050673	0.00017333	0.00029079	0.00032783	3	5	1	2	2.75	0	0	0	0	0	0	0	0	0	0
HOOK1	PREDICTED: protein Hook homolog 1 isoform X1 [Homo sapiens]	177.399	0.000123985	0.0555634	0.0764745	0.0986439	0.0824496	0.0782828	736.401	1135	856	852.959	895.09	0.00045915	0.00061175	0.0003328	0.00036142	0.00044128	16	13	8	7	11
KIF1B	kinesin-like protein KIF1B isoform alpha [Homo sapiens]	79.0337	7.6931e-06	0.00656034	0.00589502	0.00464631	0.00561735	0.00567975	137.705	138.568	63.8571	92.0385	108.042	0.00010871	0	3.502e-05	0	7.1865e-05	6	0	1.33333	0	1.83333
FAM160A2	1 genes:FAM160A2.gi|149393138|ref|NP_001092264.1|:FAM160A2:FTS and Hook-interacting protein isoform 2 [Homo sapiens] ;gi|578820852|ref|XP_006718406.1|:FAM160A2:PREDICTED: FTS and Hook-interacting protein isoform X3 [Homo sapiens] ;	53.7345	0.000289418	0.00169536	0.00191765	0.00302085	0.00260632	0.00231005	30	38	35	36	34.75	4.299e-05	0	0	0	4.299e-05	2	0	0	0	0.5
HOOK3	protein Hook homolog 3 [Homo sapiens]	40.706	0.000267	0.00272349	0.00403069	0.00222002	0.00353231	0.00312663	35.5995	59	19	36.0405	37.41	5.819e-05	9.543e-05	0	0	7.681e-05	2	2	0	0	1
AP4B1	AP-4 complex subunit beta-1 isoform 1 [Homo sapiens]	27.0452	0.00366973	0.00096628	0.00086288	0.00204341	0.00114269	0.00125381	13	13	18	12	14	0	4.636e-05	0	0	4.636e-05	0	1	0	0	0.25
FAM160A1	PREDICTED: protein FAM160A1 isoform X1 [Homo sapiens]	21.721	0.000825731	0.00211267	0.0026884	0.00419467	0.0026389	0.00290866	40	57	52	39	47	0.0001607	9.882e-05	0.00020384	7.228e-05	0.00013391	8	3	7	2	5
AKTIP	PREDICTED: AKT-interacting protein isoform X5 [Homo sapiens]	13.0819	0.000472038	0.0069365	0.00502234	0.00572651	0.00912657	0.00670298	37	30	20	38	31.25	0.00064171	0.00058461	0.00031008	0.00051314	0.000512385	9	5	3	4	5.25
CEP192	centrosomal protein of 192 kDa [Homo sapiens]	9.64362	0.0424859	0.00088771	0.00063804	0	0.00069344	0.00073973	41	33	0	25	24.75	9.47e-05	0	8.356e-05	5.186e-05	7.67067e-05	11.5	0	7	3.5	5.5
TBK1	PREDICTED: serine/threonine-protein kinase TBK1 isoform X2 [Homo sapiens]	8.52848	0.00473342	0.00105489	0.00100929	0.00034524	0.0009653	0.00084368	14	15	3	10	10.5	0.00011463	0.00018797	4.154e-05	5.156e-05	9.8925e-05	4	4	1	1	2.5
EIF4ENIF1	1 genes:EIF4ENIF1. 2 proteins in this group did not match any genes. gi|256818796|ref|NP_001157973.1|:EIF4ENIF1:eukaryotic translation initiation factor 4E transporter isoform a [Homo sapiens] ;gi|530420262|ref|XP_005261745.1|:EIF4ENIF1:PREDICTED: eukaryotic translation initiation factor 4E transporter isoform X3 [Homo sapiens] ;gi|578837305|ref|XP_006724344.1|:PREDICTED: eukaryotic translation i…	8.40753	0.000849561	0.0003346	0.00049798	0.00051103	0.00028577	0.000407345	6	10	6	4	6.5	2.121e-05	3.478e-05	6.149e-05	7.632e-05	4.845e-05	1	1	2	2	1.5
RAD50	DNA repair protein RAD50 [Homo sapiens]	8.29684	2.33549e-05	0.00163281	0.00127115	0.00140675	0.00171636	0.00150677	39	34	22	32	31.75	7.962e-05	0.00031334	0.00016158	0.00017189	0.000181608	5	12	7	6	7.5
WDR62	WD repeat-containing protein 62 isoform 1 [Homo sapiens]	7.55195	0.0103584	0.00019837	0.00011272	5.508e-05	0.00018482	0.000137748	5.5	3.5	1	4	3.5	0	2.249e-05	1.989e-05	1.234e-05	1.824e-05	0	1	1	0.5	0.625
PPP2R5D	serine/threonine-protein phosphatase 2A 56 kDa regulatory subunit delta isoform isoform 1 [Homo sapiens]	7.06658	0.00482366	0.00068434	0.00134443	0.00069679	0.00081826	0.000885955	7.5	16.5	5	7	9	0.00036305	5.691e-05	5.031e-05	3.122e-05	0.000125373	10.4615	1	1	0.5	3.24038
HAUS4	HAUS augmin-like complex subunit 4 isoform 1 [Homo sapiens]	6.75313	0.0158713	0.00045396	0.00067564	0.00023111	0.00019386	0.000388643	3	5	1	1	2.5	5.755e-05	0	0	0	5.755e-05	1	0	0	0	0.25
NFKB1	1 genes:NFKB1. 2 proteins in this group did not match any genes. gi|259155302|ref|NP_001158884.1|:NFKB1:nuclear factor NF-kappa-B p105 subunit isoform 2 [Homo sapiens] ;gi|34577122|ref|NP_003989.2|:NFKB1:nuclear factor NF-kappa-B p105 subunit isoform 1 [Homo sapiens] ;gi|530377761|ref|XP_005263086.1|:PREDICTED: nuclear factor NF-kappa-B p105 subunit isoform X1 [Homo sapiens] ;gi|578809151|ref|XP_…	6.58615	0.0115743	0.00034047	0.00025337	0.00026	7.27e-05	0.000231635	6	5	3	1	3.75	0	3.539e-05	3.129e-05	3.883e-05	3.517e-05	0	1	1	1	0.75
USP54	1 genes:USP54. 5 proteins in this group did not match any genes. gi|124001558|ref|NP_689799.3|:USP54:inactive ubiquitin carboxyl-terminal hydrolase 54 [Homo sapiens] ;gi|530393170|ref|XP_005269635.1|:PREDICTED: inactive ubiquitin carboxyl-terminal hydrolase 54 isoform X1 [Homo sapiens] ;gi|578818975|ref|XP_006717708.1|:PREDICTED: inactive ubiquitin carboxyl-terminal hydrolase 54 isoform X6 [Homo …	6.51048	0.00392072	6.524e-05	0.00011651	9.964e-05	4.179e-05	8.0795e-05	2	4	2	1	2.25	1.241e-05	0	0	0	1.241e-05	1	0	0	0	0.25
SIPA1L2	0 genes:. 2 proteins in this group did not match any genes. gi|578802285|ref|XP_006711861.1|:PREDICTED: signal-induced proliferation-associated 1-like protein 2 isoform X7 [Homo sapiens] ;gi|578802290|ref|XP_006711862.1|:PREDICTED: signal-induced proliferation-associated 1-like protein 2 isoform X8 [Homo sapiens] ;	6.22089	0.0381656	0.00035089	0.00022788	0	0.00032693	0.0003019	11	8	0	8	6.75	4.853e-05	0	0	0	4.853e-05	4	0	0	0	1
HAUS5	HAUS augmin-like complex subunit 5 [Homo sapiens]	6.20463	0.000423454	0.00078099	0.00108487	0.00092773	0.00133404	0.00103191	9	14	7	12	10.5	0.00019802	0.00021648	0.00019137	5.938e-05	0.000166313	6	4	4	1	3.75
N4BP2	NEDD4-binding protein 2 [Homo sapiens]	5.99311	0.00328557	0.00068274	0.00094223	0.00090055	0.00151078	0.00100907	22	34	19	38	28.25	0.00022426	0.00015484	0.00018821	0.00010618	0.000168373	19	8	11	5	10.75
SVIL	1 genes:SVIL. 4 proteins in this group did not match any genes. gi|150417971|ref|NP_003165.2|:SVIL:supervillin isoform 1 [Homo sapiens] ;gi|530392393|ref|XP_005252623.1|:PREDICTED: supervillin isoform X3 [Homo sapiens] ;gi|530392399|ref|XP_005252626.1|:PREDICTED: supervillin isoform X6 [Homo sapiens] ;gi|578818555|ref|XP_006717558.1|:PREDICTED: supervillin isoform X14 [Homo sapiens] ;gi|578818557…	5.93732	0.00684201	0.00027649	0.00065841	0.00028152	0.000551	0.000441855	9	24	6	14	13.25	0	0.00011496	3.388e-05	0	7.442e-05	0	6	2	0	2
CAPZA1	F-actin-capping protein subunit alpha-1 [Homo sapiens]	5.49892	0.000427749	0.00246479	0.00308716	0.00293334	0.00210901	0.00264857	12.8333	18	10	8.57143	12.3512	0.00106109	0	0.00012102	0.00026285	0.000481653	14.5263	0	1.14286	2	4.41729
KIF5B	kinesin-1 heavy chain [Homo sapiens]	5.36219	0.00850915	0.00176009	0.00240043	0.00078405	0.00257114	0.00187893	30.8571	47.1263	9	35.1852	30.5422	0.00054235	0.00032017	0.00018869	0	0.000350403	25	9	6	0	10
PPP2R3A	PREDICTED: serine/threonine-protein phosphatase 2A regulatory subunit B'' subunit alpha isoform X1 [Homo sapiens]	5.31985	0.000185956	0.00038212	0.00025592	0.0002918	0.00030596	0.00030895	8	6	4	5	5.75	9.083e-05	2.979e-05	7.9e-05	3.268e-05	5.8075e-05	5	1	3	1	2.5
ALDH1A2	1 genes:ALDH1A2.gi|25777724|ref|NP_003879.2|:ALDH1A2:retinal dehydrogenase 2 isoform 1 [Homo sapiens] ;gi|25777726|ref|NP_733797.1|:ALDH1A2:retinal dehydrogenase 2 isoform 2 [Homo sapiens] ;	5.10241	0.00535698	0.00021208	0.00037878	0.00064783	0.00040755	0.00041156	2	4	4	3	3.25	8.066e-05	0	0	0	8.066e-05	2	0	0	0	0.5
NCKAP1	1 genes:NCKAP1.gi|45545411|ref|NP_995314.1|:NCKAP1:nck-associated protein 1 isoform 2 [Homo sapiens] ;gi|578803511|ref|XP_006712263.1|:NCKAP1:PREDICTED: nck-associated protein 1 isoform X1 [Homo sapiens] ;gi|578803513|ref|XP_006712264.1|:NCKAP1:PREDICTED: nck-associated protein 1 isoform X2 [Homo sapiens] ;gi|7305303|ref|NP_038464.1|:NCKAP1:nck-associated protein 1 isoform 1 [Homo sapiens] ;	4.91461	0.00118103	0.00058126	0.00069208	0.00081378	0.00049644	0.00064589	12	16	11	8	11.75	0.00027634	3.021e-05	5.341e-05	0.00016573	0.000131422	15	1	2	5	5.75
NUP43	nucleoporin Nup43 [Homo sapiens]	4.83413	0.00141492	0.00043365	0.00051633	0.00022077	0.00037037	0.00038528	3	4	1	2	2.5	0	0	7.97e-05	0	7.97e-05	0	0	1	0	0.25
VPS45	vacuolar protein sorting-associated protein 45 isoform 1 [Homo sapiens]	4.74414	0.000710384	0.00163825	0.00189321	0.0023549	0.00222223	0.00202715	17	22	16	18	18.25	0.00025656	0.00096163	0.00042505	6.594e-05	0.000427295	7	16	8	1	8
MKL2	PREDICTED: MKL/myocardin-like protein 2 isoform X13 [Homo sapiens]	4.54773	0.0233966	0.00041732	0.00018633	0.00039835	0.00013366	0.000283915	8	4	5	2	4.75	5.952e-05	3.253e-05	8.628e-05	7.139e-05	6.243e-05	3	1	3	2	2.25
GPATCH1	G patch domain-containing protein 1 [Homo sapiens]	4.51602	0.00206683	0.00123901	0.00173867	0.00090111	0.00105821	0.00123425	21	33	10	14	19.5	0.00017952	0.00025758	0.00029276	0.00036336	0.000273305	8	7	9	9	8.25
DNMBP	dynamin-binding protein [Homo sapiens]	4.47932	0.0111289	0.00027865	0.00037325	0.0001064	0.00035699	0.000278822	8	12	2	8	7.5	5.299e-05	0	3.841e-05	9.534e-05	6.22467e-05	4	0	2	4	2.5
PJA2	E3 ubiquitin-protein ligase Praja-2 [Homo sapiens]	4.36387	0.00320646	0.00015517	0.00034641	0.00023699	0.00019879	0.00023434	2	5	2	2	2.75	5.901e-05	4.839e-05	0	0	5.37e-05	2	1	0	0	0.75
DYNC1LI1	cytoplasmic dynein 1 light intermediate chain 1 [Homo sapiens]	4.19595	0.00106329	0.00084022	0.00065652	0.00048122	0.00080731	0.000696317	8	7	3	6	6	8.433e-05	0.00026201	0.00017372	0.00014374	0.00016595	2.11111	4	3	2	2.77778
CC2D1A	PREDICTED: coiled-coil and C2 domain-containing protein 1A isoform X3 [Homo sapiens]	4.15459	0.0250588	0.00032869	0.00017266	8.859e-05	0.00028485	0.000218698	5.66667	3.33333	1	3.83333	3.45833	8.089e-05	4.22e-05	2.132e-05	6.615e-05	5.264e-05	3.66667	1.16667	0.666667	1.66667	1.79167
PEX5	1 genes:PEX5.gi|196259772|ref|NP_001124496.1|:PEX5:peroxisomal biogenesis factor 5 isoform c [Homo sapiens] ;gi|530399329|ref|XP_005253512.1|:PEX5:PREDICTED: peroxisomal biogenesis factor 5 isoform X5 [Homo sapiens] ;	3.966	0.0185688	0.00045623	0.00057037	0.00125422	0.00105205	0.000833217	5	7	9	9	7.5	0.00024292	0.00017072	0.00030184	0.00012488	0.00021009	7	3	6	2	4.5
ABI2	PREDICTED: abl interactor 2 isoform X14 [Homo sapiens]	3.86931	0.0141285	0.00040613	0.00018134	0.00031014	0.00013008	0.000256922	4	2	2	1	2.25	0	6.332e-05	0	6.948e-05	6.64e-05	0	1	0	1	0.5
KLC2	PREDICTED: kinesin light chain 2 isoform X2 [Homo sapiens]	3.85924	0.00136927	0.00075555	0.00082501	0.00115609	0.00130915	0.00101145	8.55556	10.4615	8.57143	11.5714	9.78999	0.00021112	0.00027539	0.00025968	0.00030215	0.000262085	6.28571	5	5.33333	5	5.40476
IFT27	1 genes:IFT27.gi|578836866|ref|XP_006724169.1|:IFT27:PREDICTED: intraflagellar transport protein 27 homolog isoform X1 [Homo sapiens] ;gi|6857824|ref|NP_006851.1|:IFT27:intraflagellar transport protein 27 homolog isoform 2 [Homo sapiens] ;	3.83819	0.0150059	0.00236256	0.00105487	0.00315728	0.00189168	0.0021166	8	4	7	5	6	0.00112318	0.00036837	0.00016282	0	0.000551457	10	2	1	0	3.25
SIPA1L3	1 genes:SIPA1L3. 1 proteins in this group did not match any genes. gi|530416035|ref|XP_005258728.1|:SIPA1L3:PREDICTED: signal-induced proliferation-associated 1-like protein 3 isoform X1 [Homo sapiens] ;gi|530416037|ref|XP_005258729.1|:PREDICTED: signal-induced proliferation-associated 1-like protein 3 isoform X2 [Homo sapiens] ;	3.83419	0.0265649	9.253e-05	0.00019279	4.71e-05	0.00015805	0.000122618	3	7	1	4	3.75	2.346e-05	3.847e-05	3.401e-05	0	3.198e-05	2	2	2	0	1.5
VPS13C	1 genes:VPS13C.gi|42544121|ref|NP_060154.3|:VPS13C:vacuolar protein sorting-associated protein 13C isoform 1A [Homo sapiens] ;gi|66347828|ref|NP_065872.1|:VPS13C:vacuolar protein sorting-associated protein 13C isoform 2A [Homo sapiens] ;	3.75624	0.0117957	0.00029612	0.00013221	0.00013568	0.00018968	0.000188423	20	10	6	10	11.5	3.942e-05	5.54e-05	6.53e-05	4.053e-05	5.01625e-05	7	6	8	4	6.25
IFT22	rab-like protein 5 isoform a [Homo sapiens]	3.69048	0.00247788	0.00296916	0.00238629	0.00181391	0.00190191	0.00226782	10	9	4	5	7	0.00112925	0.00055554	0.0001637	0.00060953	0.000614505	10	3	1	3	4.25
IFT74	intraflagellar transport protein 74 homolog isoform a [Homo sapiens]	3.63654	0.0119955	0.00109859	0.00130804	0.00069911	0.00164198	0.00118693	12	16	5	14	11.75	0.00073119	0.00028548	0.00010095	0.00018794	0.00032639	21	5	2	3	7.75
CCT2	T-complex protein 1 subunit beta isoform 1 [Homo sapiens]	3.6149	0.0231655	0.0044149	0.00247549	0.00125448	0.00341988	0.00289119	43	27	8	26	26	0.00121052	0.00070437	0.0007925	0.0004918	0.000799798	31	11	14	7	15.75
NBN	nibrin [Homo sapiens]	3.53394	0.0267731	0.00138417	0.00097583	0.00066759	0.00205326	0.00127021	19	15	6	22	15.5	0.00022166	0.00045435	0.00056232	0.0001994	0.000359433	8	10	14	4	9
RBSN	PREDICTED: rabenosyn-5 isoform X3 [Homo sapiens]	3.52584	0.0235481	0.00112101	0.00137644	0.00042803	0.00125662	0.00104552	16	22	4	14	14	0.00010659	0.00056806	0.00046354	4.794e-05	0.000296532	4	13	12	1	7.5
FAM91A1	protein FAM91A1 [Homo sapiens]	3.52266	0.0141363	0.00085213	0.00087801	0.00030033	0.00058782	0.000654572	13	15	3	7	9.5	0.00022437	0.00012264	0.00021684	0.00017942	0.000185818	9	3	6	4	5.5
TJP2	tight junction protein ZO-2 isoform 1 [Homo sapiens]	3.45892	0.000757463	0.00327731	0.00296782	0.00190346	0.00277935	0.00273199	71	72	27	47	54.25	0.00086023	0.00057577	0.00071259	0.00101076	0.000789838	49	20	28	32	32.25
KLC1	kinesin light chain 1 isoform 2 [Homo sapiens]	3.45784	0.0105618	0.00023433	0.00063755	0.00050198	0.0007895	0.00054084	2.44444	7.44755	3.42857	6.42857	4.93728	0.00017188	0	0.00014094	0	0.00015641	4.71429	0	2.66667	0	1.84524
MYL6	myosin light polypeptide 6 isoform 1 [Homo sapiens]	3.43946	0.00340749	0.00181886	0.0014618	0.00138896	0.00085439	0.001381	5	4.5	2.5	1.83333	3.45833	0.00034588	0	0.00056826	0.00029041	0.000401517	2.5	0	2.83333	1.16667	1.625
ANKRD28	serine/threonine-protein phosphatase 6 regulatory ankyrin repeat subunit A isoform a [Homo sapiens]	3.36853	0.00216163	0.00099113	0.00097358	0.00143407	0.00080195	0.00105018	19	20.9	18	12	17.475	0.00035711	0.00026027	0.00020132	0.00042835	0.000311762	18	8	7	12	11.25
CCT7	T-complex protein 1 subunit eta isoform a [Homo sapiens]	3.35971	0.00879284	0.00121391	0.00153568	0.001236	0.00207354	0.00151478	12	17	8	16	13.25	0.00100031	0.00044163	0.00022309	0.00013844	0.000450867	26	7	4	2	9.75
TTC26	tetratricopeptide repeat protein 26 isoform 1 [Homo sapiens]	3.31145	0.00213301	0.00089236	0.00070832	0.0004543	0.00076214	0.00070428	9	8	3	6	6.5	0.00030168	0.00012368	0	0	0.00021268	8	2	0	0	2.5
HAUS3	HAUS augmin-like complex subunit 3 [Homo sapiens]	3.29143	0.00106094	0.00163969	0.00178961	0.00236515	0.00256742	0.00209047	18	22	17	22	19.75	0.00069291	0.00090901	0.00050224	0.00043634	0.000635125	20	16	10	7	13.25
GIT1	ARF GTPase-activating protein GIT1 isoform 2 [Homo sapiens]	3.28652	0.0116669	0.0003609	0.00051565	0.00075791	0.00036989	0.000501087	5	8	6.875	4	5.96875	0.00013726	0.00013505	0.00023878	9.878e-05	0.000152467	5	3	6	2	4
ARFGAP2	ADP-ribosylation factor GTPase-activating protein 2 isoform 1 [Homo sapiens]	3.28222	0.00355162	0.00084345	0.00075319	0.0006441	0.00040521	0.000661488	8	8	4	3	5.75	0.00024059	0.00013151	0.00023251	0	0.000201537	6	2	4	0	3
PPP6R3	1 genes:PPP6R3.gi|255918192|ref|NP_001157632.1|:PPP6R3:serine/threonine-protein phosphatase 6 regulatory subunit 3 isoform 4 [Homo sapiens] ;gi|578821561|ref|XP_006718676.1|:PPP6R3:PREDICTED: serine/threonine-protein phosphatase 6 regulatory subunit 3 isoform X7 [Homo sapiens] ;	3.26007	0.0373542	0.00043744	0.00128349	0.0011453	0.0005604	0.000856657	7	23	12	7	12.25	0.00045157	0.00027282	0.00024118	8.552e-05	0.000262772	19	7	7	2	8.75
ANXA2	1 genes:ANXA2.gi|209862831|ref|NP_001129487.1|:ANXA2:annexin A2 isoform 2 [Homo sapiens] ;gi|50845388|ref|NP_001002858.1|:ANXA2:annexin A2 isoform 1 [Homo sapiens] ;	3.2501	0.0046798	0.0009722	0.00144695	0.00074242	0.00103792	0.00104987	6	10	3	5	6	0.00043138	0.00030317	0.00044668	0.00011088	0.000323028	7	3	5	1	4
PCCB	propionyl-CoA carboxylase beta chain, mitochondrial isoform 1 precursor [Homo sapiens]	3.23189	0.000730576	0.0173247	0.0148337	0.0219461	0.0174947	0.0178998	170	163	141	134	152	0.0018992	0.00788129	0.00623677	0.00613675	0.0055385	49	124	111	88	93
NFKBIE	NF-kappa-B inhibitor epsilon [Homo sapiens]	3.22624	0.00531457	0.00065915	0.00049051	0.00033557	0.00070371	0.000547235	6	5	2	5	4.5	0.00025069	0.00013703	0.00012114	0	0.00016962	6	2	2	0	2.5
ATG2A	autophagy-related protein 2 homolog A [Homo sapiens]	3.22187	0.0488193	0.00014172	7.593e-05	4.329e-05	3.631e-05	7.43125e-05	5	3	1	1	2.5	1.078e-05	3.535e-05	0	0	2.3065e-05	1	2	0	0	0.75
PSMC1	26S protease regulatory subunit 4 [Homo sapiens]	3.21974	0.00397906	0.00212228	0.00178369	0.00190667	0.00319867	0.00225283	17	16	10	20	15.75	0.00052228	0.00070074	0.00055063	0.00102512	0.000699692	11	9	8	12	10
CC2D1A	PREDICTED: coiled-coil and C2 domain-containing protein 1A isoform X2 [Homo sapiens]	3.20026	0.0390798	0.00032765	0.00017211	8.831e-05	0.00024691	0.000208745	5.66667	3.33333	1	3.33333	3.33333	0.00011362	6.01e-05	2.125e-05	6.594e-05	6.52275e-05	5.16667	1.66667	0.666667	1.66667	2.29167
ECD	1 genes:ECD.gi|209364547|ref|NP_001129224.1|:ECD:protein SGT1 isoform 2 [Homo sapiens] ;gi|6005784|ref|NP_009196.1|:ECD:protein SGT1 isoform 1 [Homo sapiens] ;	3.19565	0.00419205	0.00105478	0.00057963	0.00111527	0.00124734	0.000999255	13	8	9	12	10.5	0.00027773	0.00030362	0.00044734	0.00022208	0.000312693	9	6	10	4	7.25
KIAA1671	PREDICTED: uncharacterized protein KIAA1671 isoform X3 [Homo sapiens]	3.17844	0.000562724	0.00133826	0.00103209	0.00092905	0.00116895	0.00111709	44	38	20	30	33	0.00031233	0.00017072	0.00040246	0.00052032	0.000351457	27	9	24	25	21.25
BCCIP	BRCA2 and CDKN1A-interacting protein isoform BCCIPalpha [Homo sapiens]	3.17458	0.00382071	0.00085294	0.00106634	0.0016935	0.00131125	0.00123101	5	7	6.5	6	6.125	0	0.00042557	0.00032918	0.00040856	0.00038777	0	4	3.5	3.5	2.75
IFT46	intraflagellar transport protein 46 homolog isoform 1 [Homo sapiens]	3.1629	0.0108073	0.00170204	0.00165808	0.00330847	0.00297341	0.0024105	11	12	14	15	13	0.00111812	0.00086852	0.00042655	0.00063528	0.000762118	19	9	5	6	9.75
RELA	1 genes:RELA.gi|223468676|ref|NP_068810.3|:RELA:transcription factor p65 isoform 1 [Homo sapiens] ;gi|345842443|ref|NP_001230913.1|:RELA:transcription factor p65 isoform 3 [Homo sapiens] ;gi|345842445|ref|NP_001230914.1|:RELA:transcription factor p65 isoform 4 [Homo sapiens] ;	3.15505	0.0440727	0.00019938	0.0008012	0.00045677	0.00038314	0.000460123	2	9	3	3	4.25	0.00026541	6.217e-05	0.00010993	0	0.000145837	7	1	2	0	2.5
FAM21A	WASH complex subunit FAM21A [Homo sapiens]	3.12861	0.00135594	0.00118857	0.00107601	0.00087167	0.00146321	0.00114986	29.0167	29.4167	13.9333	27.8833	25.0625	0.00022433	0.00048198	0.00029246	0.00047136	0.000367533	14.4	18.8667	12.95	16.8167	15.7583
CC2D1A	coiled-coil and C2 domain-containing protein 1A [Homo sapiens]	3.12618	0.0418179	0.00032731	0.00017193	8.822e-05	0.00028365	0.000217777	5.66667	3.33333	1	3.83333	3.45833	0.0001135	7.805e-05	2.123e-05	6.587e-05	6.96625e-05	5.16667	2.16667	0.666667	1.66667	2.41667
SDCCAG3	serologically defined colon cancer antigen 3 isoform 2 [Homo sapiens]	3.09607	0.00881341	0.00035553	0.00035717	0.00040725	0.0001708	0.000322688	2.66667	3	2	1	2.16667	0.00010141	8.315e-05	0.00017152	6.082e-05	0.000104225	2	1	2.33333	0.666667	1.5
SDCCAG3	serologically defined colon cancer antigen 3 isoform 1 [Homo sapiens]	3.09606	0.0088132	0.00033673	0.00033829	0.00038572	0.00016177	0.000305628	2.66667	3	2	1	2.16667	9.605e-05	7.875e-05	0.00016245	5.761e-05	9.8715e-05	2	1	2.33333	0.666667	1.5
SDCCAG3	serologically defined colon cancer antigen 3 isoform 3 [Homo sapiens]	3.09602	0.00881376	0.00040464	0.0004065	0.0004635	0.00019439	0.000367258	2.66667	3	2	1	2.16667	0.00011542	9.464e-05	0.00019521	6.922e-05	0.000118622	2	1	2.33333	0.666667	1.5
PCCA	propionyl-CoA carboxylase alpha chain, mitochondrial isoform a precursor [Homo sapiens]	3.05564	0.00421824	0.0210513	0.0129366	0.0118695	0.0144028	0.0150651	279	192	103	149	180.75	0.00218095	0.00550578	0.00640642	0.00562782	0.00493024	76	117	154	109	114
USP47	1 genes:USP47.gi|530395515|ref|XP_005253054.1|:USP47:PREDICTED: ubiquitin carboxyl-terminal hydrolase 47 isoform X1 [Homo sapiens] ;gi|544063395|ref|NP_001269588.1|:USP47:ubiquitin carboxyl-terminal hydrolase 47 isoform a [Homo sapiens] ;gi|71774197|ref|NP_060414.3|:USP47:ubiquitin carboxyl-terminal hydrolase 47 isoform b [Homo sapiens] ;	3.04836	0.0113526	0.00023969	0.00017837	0.00012203	0.00030707	0.00021179	6	5	2	6	4.75	4.558e-05	7.475e-05	8.81e-05	0	6.94767e-05	3	3	4	0	2.5
HAUS1	HAUS augmin-like complex subunit 1 [Homo sapiens]	3.04633	0.0420878	0.00158071	0.00176444	0.00060355	0.0007594	0.00117702	8	10	2	3	5.75	0.00052604	0.00036969	0.00010894	0.00054083	0.000386375	7	3	1	4	3.75
ACACA	acetyl-CoA carboxylase 1 isoform 1 [Homo sapiens]	3.03178	0.00430302	0.0027776	0.00250609	0.00450623	0.00344028	0.00330755	120.5	121.75	128	116.5	121.688	0.00053916	0.00156699	0.00129947	0.00095822	0.00109096	61.5	109	102.25	60.75	83.375
ACACA	acetyl-CoA carboxylase 1 isoform 2 [Homo sapiens]	3.03178	0.00430305	0.0028214	0.00254562	0.0045773	0.00349454	0.00335972	120.5	121.75	128	116.5	121.688	0.00054766	0.00159171	0.00131996	0.00097334	0.00110817	61.5	109	102.25	60.75	83.375
PLEC	plectin isoform 1e [Homo sapiens]	3.0201	0.0258696	6.07e-05	8.672e-05	4.326e-05	2.121e-05	5.29725e-05	5	8	2.33333	1.36364	4.17424	2.457e-05	0	0	1.051e-05	1.754e-05	5.32258	0	0	1.26471	1.64682
KIAA0196	WASH complex subunit strumpellin [Homo sapiens]	3.00533	0.00747181	0.0007583	0.00101573	0.000941	0.0007286	0.000860908	16	24	13	12	16.25	7.21e-05	0.00065028	0.0002613	0.00016216	0.00028646	4	22	10	5	10.25

[truncated: 11 more sheets: CT HOOK3, CT NIN, CT NINL, NT hits, NT Venn, white spheres NT, CT hits, CT Venn, white spheres CT, NT-CT combined hits, NT-CT combined Venn]
