# Supplementary material for: The human cytoplasmic dynein interactome reveals novel activators of motility
Source: eLife. 2017 Jul 18;6:e28257. doi: 10.7554/eLife.28257 (PMC5533585; doi:10.7554/eLife.28257)
Supplement: Supplementary file 2. — This excel file contains the mass spectrometry data that was used to generate Figure 2C (second tab) and 2D (first tab). DOI: http://dx.doi.org/10.7554/eLife.28257.018 [file elife-28257-supp2.xlsx]

## Sheet: Figure 2 all plotted data
Notes: 1) only proteins detected in both samples (IC2-BioID and BioID contol) were plotted, 2) enrichment ratio of proteins detected only in IC2-BioID was set to 1024 for graphing purposes only.
						IC2-BioID Velos										BioID control Velos
						distributed normalized spectral abundance factor (dNSAF)					distributed Spectral Counts					distributed normalized spectral abundance factor (dNSAF)					distributed Spectral Counts
NCBI_Gene	Description	enrichment ratio	p-value	x-axis	y-axis	dNSAF 1	dNSAF 2	dNSAF 3	dNSAF 4	avg dNSAF	dSC 1	dSC 2	dSC 3	dSC 4	avg dSCs	dNSAF 1	dNSAF 2	dNSAF 3	dNSAF 4	avg dNSAF	dSC 1	dSC 2	dSC 3	dSC 4	avg dSCs
ABR	gi|229094128|ref|NP_001153218.1|:active breakpoint cluster region-related protein isoform c [Homo sapiens] ;gi|38679954|ref|NP_001083.2|:active breakpoint cluster region-related protein isoform b [Homo sapiens] ;gi|38679957|ref|NP_068781.2|:active breakpoint cluster region-related protein isoform a [Homo sapiens] ;gi|578829851|ref|XP_006721569.1|:PREDICTED: active breakpoint cluster region-relate…	1024	0.134442	10	0.871464	0	9.19e-06	9.92e-06	0	9.555e-06	0	1.07576	1.03448	0	0.52756	0	0	0	0	#DIV/0!	0	0	0	0	0
ACTR1B	beta-centractin [Homo sapiens]	1024	0.0127587	10	1.89419	0.00020901	4.349e-05	9.566e-05	0.00015446	0.000125655	11.25	2.35556	4.61538	5.95238	6.04333	0	0	0	0	#DIV/0!	0	0	0	0	0
AFG3L2	AFG3-like protein 2 [Homo sapiens]	1024	0.158588	10	0.799729	0	1.742e-05	9.78e-06	0	1.36e-05	0	2	1	0	0.75	0	0	0	0	#DIV/0!	0	0	0	0	0
AGPAT3	gi|530419317|ref|XP_005261216.1|:PREDICTED: 1-acyl-sn-glycerol-3-phosphate acyltransferase gamma isoform X1 [Homo sapiens] ;gi|578836617|ref|XP_006724093.1|:PREDICTED: 1-acyl-sn-glycerol-3-phosphate acyltransferase gamma isoform X4 [Homo sapiens] ;gi|578836619|ref|XP_006724094.1|:PREDICTED: 1-acyl-sn-glycerol-3-phosphate acyltransferase gamma isoform X5 [Homo sapiens] ;	1024	0.355918	10	0.44865	0	0	5.05e-05	0	5.05e-05	0	0	3	0	0.75	0	0	0	0	#DIV/0!	0	0	0	0	0
AGPAT5	1-acyl-sn-glycerol-3-phosphate acyltransferase epsilon [Homo sapiens]	1024	0.0279773	10	1.55319	0	3.814e-05	4.282e-05	5.361e-05	4.48567e-05	0	2	2	2	1.5	0	0	0	0	#DIV/0!	0	0	0	0	0
AIG1	gi|40316941|ref|NP_057192.2|:androgen-induced gene 1 protein isoform a [Homo sapiens] ;gi|530383780|ref|XP_005267067.1|:PREDICTED: androgen-induced gene 1 protein isoform X1 [Homo sapiens] ;gi|557440814|ref|NP_001273516.1|:androgen-induced gene 1 protein isoform b [Homo sapiens] ;	1024	0.135046	10	0.86952	0	2.917e-05	3.275e-05	0	3.096e-05	0	1	1	0	0.5	0	0	0	0	#DIV/0!	0	0	0	0	0
ALAS1	gi|530372051|ref|XP_005265001.1|:PREDICTED: 5-aminolevulinate synthase, nonspecific, mitochondrial isoform X1 [Homo sapiens] ;gi|530372053|ref|XP_005265002.1|:PREDICTED: 5-aminolevulinate synthase, nonspecific, mitochondrial isoform X2 [Homo sapiens] ;	1024	0.135045	10	0.86952	0	3.17e-05	3.559e-05	0	3.3645e-05	0	3	3	0	1.5	0	0	0	0	#DIV/0!	0	0	0	0	0
APOBEC3F	DNA dC-_dU-editing enzyme APOBEC-3F isoform a [Homo sapiens]	1024	0.184242	10	0.734612	4.427e-05	1.861e-05	0	0	3.144e-05	2.36364	1	0	0	0.840909	0	0	0	0	#DIV/0!	0	0	0	0	0
ARFGEF1	gi|530388216|ref|XP_005251191.1|:PREDICTED: brefeldin A-inhibited guanine nucleotide-exchange protein 1 isoform X1 [Homo sapiens] ;gi|530388218|ref|XP_005251192.1|:PREDICTED: brefeldin A-inhibited guanine nucleotide-exchange protein 1 isoform X2 [Homo sapiens] ;gi|530388220|ref|XP_005251193.1|:PREDICTED: brefeldin A-inhibited guanine nucleotide-exchange protein 1 isoform X3 [Homo sapiens] ;gi|578…	1024	0.355918	10	0.44865	1.133e-05	0	0	0	1.133e-05	3	0	0	0	0.75	0	0	0	0	#DIV/0!	0	0	0	0	0
ARFGEF2	gi|150417986|ref|NP_006411.2|:brefeldin A-inhibited guanine nucleotide-exchange protein 2 [Homo sapiens] ;gi|530417777|ref|XP_005260309.1|:PREDICTED: brefeldin A-inhibited guanine nucleotide-exchange protein 2 isoform X1 [Homo sapiens] ;	1024	0.355918	10	0.44865	7.83e-06	0	0	0	7.83e-06	2	0	0	0	0.5	0	0	0	0	#DIV/0!	0	0	0	0	0
ARL3	ADP-ribosylation factor-like protein 3 [Homo sapiens]	1024	0.355918	10	0.44865	0	0.00011443	0	0	0.00011443	0	3	0	0	0.75	0	0	0	0	#DIV/0!	0	0	0	0	0
ATG13	gi|326806954|ref|NP_001192049.1|:autophagy-related protein 13 isoform 1 [Homo sapiens] ;gi|326806956|ref|NP_001192050.1|:autophagy-related protein 13 isoform 2 [Homo sapiens] ;gi|326806958|ref|NP_001192051.1|:autophagy-related protein 13 isoform 4 [Homo sapiens] ;gi|578820989|ref|XP_006718459.1|:PREDICTED: autophagy-related protein 13 isoform X10 [Homo sapiens] ;	1024	0.178737	10	0.747787	0	1.343e-05	3.015e-05	0	2.179e-05	0	1	2	0	0.75	0	0	0	0	#DIV/0!	0	0	0	0	0
ATP5J2-PTCD1	ATP5J2-PTCD1 fusion protein [Homo sapiens]	1024	0.00156132	10	2.80651	4.663e-05	3.707e-05	4.162e-05	7.816e-05	5.087e-05	5	4	4	6	4.75	0	0	0	0	#DIV/0!	0	0	0	0	0
ATP5O	ATP synthase subunit O, mitochondrial precursor [Homo sapiens]	1024	0.178757	10	0.747736	0	3.259e-05	7.318e-05	0	5.2885e-05	0	1	2	0	0.75	0	0	0	0	#DIV/0!	0	0	0	0	0
BASP1	brain acid soluble protein 1 [Homo sapiens]	1024	0.355918	10	0.44865	0	9.174e-05	0	0	9.174e-05	0	3	0	0	0.75	0	0	0	0	#DIV/0!	0	0	0	0	0
BCAT1	gi|296010904|ref|NP_001171564.1|:branched-chain-amino-acid aminotransferase, cytosolic isoform 4 [Homo sapiens] ;gi|296010906|ref|NP_001171565.1|:branched-chain-amino-acid aminotransferase, cytosolic isoform 5 [Homo sapiens] ;gi|38176287|ref|NP_005495.2|:branched-chain-amino-acid aminotransferase, cytosolic isoform 1 [Homo sapiens] ;gi|530399339|ref|XP_005253517.1|:PREDICTED: branched-chain-amino…	1024	0.355918	10	0.44865	7.021e-05	0	0	0	7.021e-05	4	0	0	0	1	0	0	0	0	#DIV/0!	0	0	0	0	0
BCKDK	gi|171906589|ref|NP_005872.2|:[3-methyl-2-oxobutanoate dehydrogenase [lipoamide]] kinase, mitochondrial isoform a precursor [Homo sapiens] ;gi|171906593|ref|NP_001116429.1|:[3-methyl-2-oxobutanoate dehydrogenase [lipoamide]] kinase, mitochondrial isoform b precursor [Homo sapiens] ;gi|429484478|ref|NP_001258855.1|:[3-methyl-2-oxobutanoate dehydrogenase [lipoamide]] kinase, mitochondrial isoform c…	1024	0.0317099	10	1.49881	5.087e-05	5.055e-05	7.566e-05	0	5.90267e-05	3	3	4	0	2.5	0	0	0	0	#DIV/0!	0	0	0	0	0
BICD1	protein bicaudal D homolog 1 isoform 1 [Homo sapiens]	1024	1.18349e-05	10	4.92683	0.00020827	0.00030293	0.0002756	0.00026102	0.000261955	29.0687	42.5456	34.4788	26.083	33.044	0	0	0	0	#DIV/0!	0	0	0	0	0
BLMH	bleomycin hydrolase [Homo sapiens]	1024	0.355918	10	0.44865	0	0	3.426e-05	0	3.426e-05	0	0	2	0	0.5	0	0	0	0	#DIV/0!	0	0	0	0	0
BRE	gi|21361171|ref|NP_004890.2|:BRCA1-A complex subunit BRE isoform 1 [Homo sapiens] ;gi|387912573|ref|NP_001248769.1|:BRCA1-A complex subunit BRE isoform 4 [Homo sapiens] ;gi|40353759|ref|NP_954662.1|:BRCA1-A complex subunit BRE isoform 3 [Homo sapiens] ;gi|40353761|ref|NP_954661.1|:BRCA1-A complex subunit BRE isoform 2 [Homo sapiens] ;	1024	0.355918	10	0.44865	0	6.691e-05	0	0	6.691e-05	0	4	0	0	1	0	0	0	0	#DIV/0!	0	0	0	0	0
C10orf32	UPF0693 protein C10orf32 [Homo sapiens]	1024	0.17875	10	0.747753	0	0.00013098	0.00029409	0	0.000212535	0	2	4	0	1.5	0	0	0	0	#DIV/0!	0	0	0	0	0
C14orf169	bifunctional lysine-specific demethylase and histidyl-hydroxylase NO66 [Homo sapiens]	1024	0.134931	10	0.869887	1.09e-05	0	1.216e-05	0	1.153e-05	1	0	1	0	0.5	0	0	0	0	#DIV/0!	0	0	0	0	0
C15orf61	uncharacterized protein C15orf61 precursor [Homo sapiens]	1024	0.158599	10	0.7997	0	8.843e-05	4.964e-05	0	6.9035e-05	0	2	1	0	0.75	0	0	0	0	#DIV/0!	0	0	0	0	0
C17orf100	uncharacterized protein C17orf100 [Homo sapiens]	1024	0.355918	10	0.44865	0	0.00011766	0	0	0.00011766	0	2	0	0	0.5	0	0	0	0	#DIV/0!	0	0	0	0	0
C17orf104	gi|274315853|ref|NP_001138552.2|:uncharacterized protein C17orf104 [Homo sapiens] ;gi|530411953|ref|XP_005257293.1|:PREDICTED: uncharacterized protein C17orf104 isoform X1 [Homo sapiens] ;	1024	0.178119	10	0.749289	7.34e-06	0	1.637e-05	0	1.1855e-05	1	0	2	0	0.75	0	0	0	0	#DIV/0!	0	0	0	0	0
C17orf62	gi|302393577|ref|NP_001180586.1|:uncharacterized protein C17orf62 isoform a [Homo sapiens] ;gi|578832056|ref|XP_006722356.1|:PREDICTED: uncharacterized protein C17orf62 isoform X1 [Homo sapiens] ;	1024	0.134932	10	0.869885	7.471e-05	0	8.335e-05	0	7.903e-05	2	0	2	0	1	0	0	0	0	#DIV/0!	0	0	0	0	0
C18orf8	uncharacterized protein C18orf8 isoform 1 [Homo sapiens]	1024	0.0451988	10	1.34487	1.063e-05	2.113e-05	1.186e-05	0	1.454e-05	1	2	1	0	1	0	0	0	0	#DIV/0!	0	0	0	0	0
C19orf12	gi|110611188|ref|NP_001026896.2|:protein C19orf12 isoform 1 [Homo sapiens] ;gi|365777413|ref|NP_001242975.1|:protein C19orf12 isoform 3 [Homo sapiens] ;gi|365777416|ref|NP_001242976.1|:protein C19orf12 isoform 2 [Homo sapiens] ;gi|544711234|ref|NP_001269860.1|:protein C19orf12 isoform 4 [Homo sapiens] ;	1024	0.355918	10	0.44865	0	0	0.00010254	0	0.00010254	0	0	2	0	0.5	0	0	0	0	#DIV/0!	0	0	0	0	0
C3orf38	gi|197333715|ref|NP_776185.2|:uncharacterized protein C3orf38 [Homo sapiens] ;gi|530373687|ref|XP_005264802.1|:PREDICTED: uncharacterized protein C3orf38 isoform X1 [Homo sapiens] ;	1024	0.137974	10	0.860202	0	0	2.369e-05	2.966e-05	2.6675e-05	0	0	1	1	0.5	0	0	0	0	#DIV/0!	0	0	0	0	0
CAPN7	gi|530372183|ref|XP_005265065.1|:PREDICTED: calpain-7 isoform X2 [Homo sapiens] ;gi|578805910|ref|XP_006713143.1|:PREDICTED: calpain-7 isoform X5 [Homo sapiens] ;gi|7656959|ref|NP_055111.1|:calpain-7 [Homo sapiens] ;	1024	0.0355815	10	1.44878	0	3.862e-05	2.168e-05	2.714e-05	2.91467e-05	0	4	2	2	2	0	0	0	0	#DIV/0!	0	0	0	0	0
CASP8	gi|122056476|ref|NP_001073594.1|:caspase-8 isoform G precursor [Homo sapiens] ;gi|15718704|ref|NP_001219.2|:caspase-8 isoform A precursor [Homo sapiens] ;gi|530371024|ref|XP_005246942.1|:PREDICTED: caspase-8 isoform X1 [Homo sapiens] ;gi|530371038|ref|XP_005246949.1|:PREDICTED: caspase-8 isoform X8 [Homo sapiens] ;gi|578805001|ref|XP_006712853.1|:PREDICTED: caspase-8 isoform X15 [Homo sapiens] ;g…	1024	0.15859	10	0.799724	0	2.581e-05	1.449e-05	0	2.015e-05	0	2	1	0	0.75	0	0	0	0	#DIV/0!	0	0	0	0	0
CCDC71	coiled-coil domain-containing protein 71 [Homo sapiens]	1024	0.355918	10	0.44865	0	0	3.338e-05	0	3.338e-05	0	0	2	0	0.5	0	0	0	0	#DIV/0!	0	0	0	0	0
CCT6B	T-complex protein 1 subunit zeta-2 isoform 1 [Homo sapiens]	1024	0.00145579	10	2.8369	6.719e-05	4.038e-05	3.118e-05	3.746e-05	4.40525e-05	5.09742	3.08313	2.1206	2.0349	3.08401	0	0	0	0	#DIV/0!	0	0	0	0	0
CDSN	corneodesmosin precursor [Homo sapiens]	1024	0.355918	10	0.44865	0	0	2.946e-05	0	2.946e-05	0	0	2	0	0.5	0	0	0	0	#DIV/0!	0	0	0	0	0
CENPM	gi|13129022|ref|NP_076958.1|:centromere protein M isoform a [Homo sapiens] ;gi|50845414|ref|NP_001002876.1|:centromere protein M isoform b [Homo sapiens] ;gi|530420359|ref|XP_005261793.1|:PREDICTED: centromere protein M isoform X1 [Homo sapiens] ;	1024	0.355918	10	0.44865	0	7.713e-05	0	0	7.713e-05	0	2	0	0	0.5	0	0	0	0	#DIV/0!	0	0	0	0	0
CLN6	ceroid-lipofuscinosis neuronal protein 6 [Homo sapiens]	1024	0.154345	10	0.811506	0	4.464e-05	7.518e-05	0	5.991e-05	0	2	3	0	1.25	0	0	0	0	#DIV/0!	0	0	0	0	0
CLPX	ATP-dependent Clp protease ATP-binding subunit clpX-like, mitochondrial precursor [Homo sapiens]	1024	0.178708	10	0.747855	0	1.097e-05	2.462e-05	0	1.7795e-05	0	1	2	0	0.75	0	0	0	0	#DIV/0!	0	0	0	0	0
CNDP2	gi|271398277|ref|NP_001161971.1|:cytosolic non-specific dipeptidase isoform 2 [Homo sapiens] ;gi|578832594|ref|XP_006722566.1|:PREDICTED: cytosolic non-specific dipeptidase isoform X4 [Homo sapiens] ;	1024	0.133978	10	0.872966	1.787e-05	1.775e-05	0	0	1.781e-05	1	1	0	0	0.5	0	0	0	0	#DIV/0!	0	0	0	0	0
COMMD2	COMM domain-containing protein 2 [Homo sapiens]	1024	0.036301	10	1.44008	0	0.00017442	0.00011749	9.806e-05	0.00012999	0	5	3	2	2.5	0	0	0	0	#DIV/0!	0	0	0	0	0
COMMD4	gi|21361661|ref|NP_060298.2|:COMM domain-containing protein 4 isoform 1 [Homo sapiens] ;gi|530406113|ref|XP_005254566.1|:PREDICTED: COMM domain-containing protein 4 isoform X1 [Homo sapiens] ;gi|530406115|ref|XP_005254567.1|:PREDICTED: COMM domain-containing protein 4 isoform X2 [Homo sapiens] ;gi|530406118|ref|XP_005254568.1|:PREDICTED: COMM domain-containing protein 4 isoform X3 [Homo sapiens] ;	1024	0.207662	10	0.682643	0.00010531	3.488e-05	0	0	7.0095e-05	3	1	0	0	1	0	0	0	0	#DIV/0!	0	0	0	0	0
COMT	gi|530426189|ref|XP_005261286.1|:PREDICTED: catechol O-methyltransferase isoform X1 [Homo sapiens] ;gi|6466450|ref|NP_009294.1|:catechol O-methyltransferase isoform S-COMT [Homo sapiens] ;	1024	0.196197	10	0.707307	7.733e-05	0	2.876e-05	0	5.3045e-05	3	0	1	0	1	0	0	0	0	#DIV/0!	0	0	0	0	0
COX7A2	cytochrome c oxidase subunit 7A2, mitochondrial precursor [Homo sapiens]	1024	0.150642	10	0.822053	0	0	0.00013554	8.484e-05	0.00011019	0	0	2	1	0.75	0	0	0	0	#DIV/0!	0	0	0	0	0
CSTF2T	cleavage stimulation factor subunit 2 tau variant [Homo sapiens]	1024	0.137979	10	0.860187	0	0	2.53e-05	3.168e-05	2.849e-05	0	0	2	2	1	0	0	0	0	#DIV/0!	0	0	0	0	0
CTAGE6	gi|146262005|ref|NP_848656.2|:cTAGE family member 6 [Homo sapiens] ;gi|350994421|ref|NP_001234917.1|:cTAGE family member 5 isoform 5 [Homo sapiens] ;gi|350994423|ref|NP_001234918.1|:cTAGE family member 5 isoform 6 [Homo sapiens] ;gi|350994425|ref|NP_001234919.1|:cTAGE family member 5 isoform 7 [Homo sapiens] ;gi|42740897|ref|NP_005921.2|:cTAGE family member 5 isoform 1 [Homo sapiens] ;gi|42740899…	1024	0.133978	10	0.872968	1.798e-05	1.787e-05	0	0	1.7925e-05	2	2	0	0	1	0	0	0	0	#DIV/0!	0	0	0	0	0
CTDNEP1	CTD nuclear envelope phosphatase 1 [Homo sapiens]	1024	0.355918	10	0.44865	0	5.69e-05	0	0	5.69e-05	0	2	0	0	0.5	0	0	0	0	#DIV/0!	0	0	0	0	0
CTU1	cytoplasmic tRNA 2-thiolation protein 1 [Homo sapiens]	1024	0.168776	10	0.77269	4.015e-05	1.995e-05	0	0	3.005e-05	2	1	0	0	0.75	0	0	0	0	#DIV/0!	0	0	0	0	0
CYP20A1	gi|29171730|ref|NP_803882.1|:cytochrome P450 20A1 [Homo sapiens] ;gi|530370643|ref|XP_005246756.1|:PREDICTED: cytochrome P450 20A1 isoform X3 [Homo sapiens] ;gi|578804630|ref|XP_006712707.1|:PREDICTED: cytochrome P450 20A1 isoform X6 [Homo sapiens] ;gi|578804632|ref|XP_006712708.1|:PREDICTED: cytochrome P450 20A1 isoform X7 [Homo sapiens] ;	1024	0.134897	10	0.869999	0	7.513e-05	6.748e-05	0	7.1305e-05	0	5	4	0	2.25	0	0	0	0	#DIV/0!	0	0	0	0	0
DAP	death-associated protein 1 [Homo sapiens]	1024	0.178747	10	0.747761	0	6.806e-05	0.00015281	0	0.000110435	0	1	2	0	0.75	0	0	0	0	#DIV/0!	0	0	0	0	0
DCD	gi|16751921|ref|NP_444513.1|:dermcidin preproprotein [Homo sapiens] ;gi|530399720|ref|XP_005268684.1|:PREDICTED: dermcidin isoform X1 [Homo sapiens] ;	1024	0.355918	10	0.44865	0	0.00012622	0	0	0.00012622	0	2	0	0	0.5	0	0	0	0	#DIV/0!	0	0	0	0	0
DCLK1	gi|4758128|ref|NP_004725.1|:serine/threonine-protein kinase DCLK1 isoform 1 [Homo sapiens] ;gi|578825081|ref|XP_006719956.1|:PREDICTED: serine/threonine-protein kinase DCLK1 isoform X2 [Homo sapiens] ;	1024	0.355918	10	0.44865	0	1.905e-05	0	0	1.905e-05	0	2	0	0	0.5	0	0	0	0	#DIV/0!	0	0	0	0	0
DCTD	gi|530377248|ref|XP_005262835.1|:PREDICTED: deoxycytidylate deaminase isoform X1 [Homo sapiens] ;gi|530377252|ref|XP_005262837.1|:PREDICTED: deoxycytidylate deaminase isoform X3 [Homo sapiens] ;gi|578808833|ref|XP_006714176.1|:PREDICTED: deoxycytidylate deaminase isoform X6 [Homo sapiens] ;gi|61742821|ref|NP_001012750.1|:deoxycytidylate deaminase isoform a [Homo sapiens] ;	1024	0.0363429	10	1.43958	0	0.00011019	0.00020618	0.00015487	0.00015708	0	3	5	3	2.75	0	0	0	0	#DIV/0!	0	0	0	0	0
DCTN3	gi|526479822|ref|NP_001268354.1|:dynactin subunit 3 isoform 3 [Homo sapiens] ;gi|6005745|ref|NP_009165.1|:dynactin subunit 3 isoform 1 [Homo sapiens] ;	1024	0.0189229	10	1.72301	0.00145905	0.00043937	0.00098651	0.00037052	0.000813863	33	10	20	6	17.25	0	0	0	0	#DIV/0!	0	0	0	0	0
DCTN4	gi|208431793|ref|NP_001129115.1|:dynactin subunit 4 isoform a [Homo sapiens] ;gi|7705893|ref|NP_057305.1|:dynactin subunit 4 isoform b [Homo sapiens] ;	1024	0.000621847	10	3.20632	0.0009424	0.00069866	0.00048396	0.00054321	0.000667058	63	47	29	26	41.25	0	0	0	0	#DIV/0!	0	0	0	0	0
DCTN5	gi|14210488|ref|NP_115875.1|:dynactin subunit 5 isoform 1 [Homo sapiens] ;gi|317008627|ref|NP_001186672.1|:dynactin subunit 5 isoform 3 [Homo sapiens] ;	1024	0.0653748	10	1.18459	0	0.00015257	0.00029975	0.00010722	0.000186513	0	4	7	2	3.25	0	0	0	0	#DIV/0!	0	0	0	0	0
DCTN6	dynactin subunit 6 [Homo sapiens]	1024	0.00278925	10	2.55451	0.0001103	0.0002923	0.00020509	0.00015406	0.000190438	3	8	5	3	4.75	0	0	0	0	#DIV/0!	0	0	0	0	0
DECR1	gi|4503301|ref|NP_001350.1|:2,4-dienoyl-CoA reductase, mitochondrial precursor [Homo sapiens] ;gi|530388794|ref|XP_005250865.1|:PREDICTED: 2,4-dienoyl-CoA reductase, mitochondrial isoform X1 [Homo sapiens] ;	1024	0.0355811	10	1.44878	0	4.144e-05	2.326e-05	2.913e-05	3.12767e-05	0	2	1	1	1	0	0	0	0	#DIV/0!	0	0	0	0	0
DHPS	gi|333033798|ref|NP_001193903.1|:deoxyhypusine synthase isoform d [Homo sapiens] ;gi|4503325|ref|NP_001921.1|:deoxyhypusine synthase isoform a [Homo sapiens] ;gi|7108338|ref|NP_037538.1|:deoxyhypusine synthase isoform b [Homo sapiens] ;	1024	0.355918	10	0.44865	4.273e-05	0	0	0	4.273e-05	2	0	0	0	0.5	0	0	0	0	#DIV/0!	0	0	0	0	0
DNAJC12	dnaJ homolog subfamily C member 12 isoform a [Homo sapiens]	1024	0.0301986	10	1.52001	0.00010584	7.012e-05	7.872e-05	0	8.48933e-05	3	2	2	0	1.75	0	0	0	0	#DIV/0!	0	0	0	0	0
DSC1	gi|13435361|ref|NP_077739.1|:desmocollin-1 isoform Dsc1a preproprotein [Homo sapiens] ;gi|4826702|ref|NP_004939.1|:desmocollin-1 isoform Dsc1b preproprotein [Homo sapiens] ;	1024	0.141462	10	0.84936	1.563e-05	0	7.846e-05	2.183e-05	3.864e-05	2	0	9	2	3.25	0	0	0	0	#DIV/0!	0	0	0	0	0
DSG1	desmoglein-1 preproprotein [Homo sapiens]	1024	0.291212	10	0.535791	0	1.324e-05	0.00011144	0	6.234e-05	0	2	15	0	4.25	0	0	0	0	#DIV/0!	0	0	0	0	0
DTWD2	DTW domain-containing protein 2 [Homo sapiens]	1024	0.218379	10	0.660789	0	2.33e-05	7.846e-05	0	5.088e-05	0	1	3	0	1	0	0	0	0	#DIV/0!	0	0	0	0	0
DYNC1I2	PREDICTED: cytoplasmic dynein 1 intermediate chain 2 isoform X5 [Homo sapiens]	1024	0.000104065	10	3.9827	0.0455952	0.0665203	0.060103	0.0832685	0.0638718	4125	6056	4874	5223	5069.5	0	0	0	0	#DIV/0!	0	0	0	0	0
DYNLRB1	dynein light chain roadblock-type 1 isoform a [Homo sapiens]	1024	5.97233e-08	10	7.22386	0.005021	0.00462801	0.00446498	0.00437028	0.00462107	69	64	55	43	57.75	0	0	0	0	#DIV/0!	0	0	0	0	0
DYNLT3	dynein light chain Tctex-type 3 [Homo sapiens]	1024	6.20918e-06	10	5.20697	0.0161395	0.0143628	0.0134369	0.0116074	0.0138866	268	240	200	138	211.5	0	0	0	0	#DIV/0!	0	0	0	0	0
EHD1	gi|540344518|ref|NP_001269374.1|:EH domain-containing protein 1 isoform 2 [Homo sapiens] ;gi|578821106|ref|XP_006718487.1|:PREDICTED: EH domain-containing protein 1 isoform X1 [Homo sapiens] ;	1024	0.159119	10	0.798277	2.55e-05	0	1.422e-05	0	1.986e-05	2	0	1	0	0.75	0	0	0	0	#DIV/0!	0	0	0	0	0
ELMO2	gi|530418291|ref|XP_005260559.1|:PREDICTED: engulfment and cell motility protein 2 isoform X8 [Homo sapiens] ;gi|578836138|ref|XP_006723917.1|:PREDICTED: engulfment and cell motility protein 2 isoform X9 [Homo sapiens] ;gi|578836140|ref|XP_006723918.1|:PREDICTED: engulfment and cell motility protein 2 isoform X10 [Homo sapiens] ;	1024	0.0293375	10	1.53258	1.301e-05	1.293e-05	0	1.817e-05	1.47033e-05	1	1	0	1	0.75	0	0	0	0	#DIV/0!	0	0	0	0	0
ELOVL4	elongation of very long chain fatty acids protein 4 [Homo sapiens]	1024	0.135043	10	0.869528	0	4.422e-05	4.964e-05	0	4.693e-05	0	2	2	0	1	0	0	0	0	#DIV/0!	0	0	0	0	0
ELOVL5	gi|338827646|ref|NP_001229757.1|:elongation of very long chain fatty acids protein 5 isoform 2 [Homo sapiens] ;gi|530382330|ref|XP_005249324.1|:PREDICTED: elongation of very long chain fatty acids protein 5 isoform X2 [Homo sapiens] ;	1024	0.133978	10	0.872966	2.143e-05	2.129e-05	0	0	2.136e-05	1	1	0	0	0.5	0	0	0	0	#DIV/0!	0	0	0	0	0
ERLIN1	PREDICTED: erlin-1 isoform X1 [Homo sapiens]	1024	0.0307715	10	1.51185	0	3.99e-05	4.479e-05	2.804e-05	3.75767e-05	0	2	2	1	1.25	0	0	0	0	#DIV/0!	0	0	0	0	0
EXOC8	exocyst complex component 8 [Homo sapiens]	1024	0.355918	10	0.44865	0	0	2.15e-05	0	2.15e-05	0	0	2	0	0.5	0	0	0	0	#DIV/0!	0	0	0	0	0
FAIM	gi|74271890|ref|NP_001028204.1|:fas apoptotic inhibitory molecule 1 isoform c [Homo sapiens] ;gi|74271911|ref|NP_001028202.1|:fas apoptotic inhibitory molecule 1 isoform a [Homo sapiens] ;gi|74271917|ref|NP_001028203.1|:fas apoptotic inhibitory molecule 1 isoform b [Homo sapiens] ;	1024	0.154344	10	0.811509	0	7.756e-05	0.00013062	0	0.00010409	0	2	3	0	1.25	0	0	0	0	#DIV/0!	0	0	0	0	0
FAM105B	ubiquitin thioesterase otulin [Homo sapiens]	1024	0.355918	10	0.44865	7.938e-05	0	0	0	7.938e-05	4	0	0	0	1	0	0	0	0	#DIV/0!	0	0	0	0	0
FAM110B	PREDICTED: protein FAM110B isoform X3 [Homo sapiens]	1024	0.0279769	10	1.5532	0	3.752e-05	4.213e-05	5.274e-05	4.413e-05	0	2	2	2	1.5	0	0	0	0	#DIV/0!	0	0	0	0	0
FLG	filaggrin [Homo sapiens]	1024	0.218409	10	0.660729	0	1.71e-06	5.76e-06	0	3.735e-06	0	1	3	0	1	0	0	0	0	#DIV/0!	0	0	0	0	0
FLG2	filaggrin-2 [Homo sapiens]	1024	0.355918	10	0.44865	0	0	9.78e-06	0	9.78e-06	0	0	3	0	0.75	0	0	0	0	#DIV/0!	0	0	0	0	0
GCAT	gi|530419682|ref|XP_005261467.1|:PREDICTED: 2-amino-3-ketobutyrate coenzyme A ligase, mitochondrial isoform X2 [Homo sapiens] ;gi|530419684|ref|XP_005261468.1|:PREDICTED: 2-amino-3-ketobutyrate coenzyme A ligase, mitochondrial isoform X3 [Homo sapiens] ;gi|578837022|ref|XP_006724235.1|:PREDICTED: 2-amino-3-ketobutyrate coenzyme A ligase, mitochondrial isoform X4 [Homo sapiens] ;gi|7657118|ref|NP_…	1024	0.217773	10	0.661995	1.57e-05	0	5.254e-05	0	3.412e-05	1	0	3	0	1	0	0	0	0	#DIV/0!	0	0	0	0	0
GLB1	gi|119372308|ref|NP_000395.2|:beta-galactosidase isoform a preproprotein [Homo sapiens] ;gi|119372312|ref|NP_001073279.1|:beta-galactosidase isoform b [Homo sapiens] ;gi|208022658|ref|NP_001129074.1|:beta-galactosidase isoform c preproprotein [Homo sapiens] ;	1024	0.355918	10	0.44865	2.064e-05	0	0	0	2.064e-05	2	0	0	0	0.5	0	0	0	0	#DIV/0!	0	0	0	0	0
GLMN	gi|16933537|ref|NP_444504.1|:glomulin [Homo sapiens] ;gi|530361659|ref|XP_005270458.1|:PREDICTED: glomulin isoform X2 [Homo sapiens] ;gi|578798276|ref|XP_006710372.1|:PREDICTED: glomulin isoform X3 [Homo sapiens] ;	1024	0.0172747	10	1.76259	1.176e-05	4.675e-05	2.624e-05	1.643e-05	2.5295e-05	1	4	2	1	2	0	0	0	0	#DIV/0!	0	0	0	0	0
GOSR1	gi|4758456|ref|NP_004862.1|:Golgi SNAP receptor complex member 1 isoform 1 [Homo sapiens] ;gi|530411221|ref|XP_005258127.1|:PREDICTED: Golgi SNAP receptor complex member 1 isoform X1 [Homo sapiens] ;gi|530411223|ref|XP_005258128.1|:PREDICTED: Golgi SNAP receptor complex member 1 isoform X2 [Homo sapiens] ;gi|55770858|ref|NP_001007026.1|:Golgi SNAP receptor complex member 1 isoform 2 [Homo sapiens…	1024	0.0469428	10	1.32843	0	2.777e-05	6.235e-05	3.903e-05	4.305e-05	0	1	2	1	1	0	0	0	0	#DIV/0!	0	0	0	0	0
HAX1	gi|13435356|ref|NP_006109.2|:HCLS1-associated protein X-1 isoform a [Homo sapiens] ;gi|66363694|ref|NP_001018238.1|:HCLS1-associated protein X-1 isoform b [Homo sapiens] ;	1024	0.189212	10	0.723051	0	0	2.793e-05	6.994e-05	4.8935e-05	0	0	1	2	0.75	0	0	0	0	#DIV/0!	0	0	0	0	0
HM13	gi|23308607|ref|NP_110416.1|:minor histocompatibility antigen H13 isoform 1 [Homo sapiens] ;gi|30581109|ref|NP_848695.1|:minor histocompatibility antigen H13 isoform 2 [Homo sapiens] ;gi|30581111|ref|NP_848696.1|:minor histocompatibility antigen H13 isoform 3 [Homo sapiens] ;gi|30581113|ref|NP_848697.1|:minor histocompatibility antigen H13 isoform 4 [Homo sapiens] ;gi|530418419|ref|XP_005260619.1…	1024	0.355918	10	0.44865	0	0	0	5.176e-05	5.176e-05	0	0	0	2	0.5	0	0	0	0	#DIV/0!	0	0	0	0	0
HNRNPH3	gi|530393530|ref|XP_005269809.1|:PREDICTED: heterogeneous nuclear ribonucleoprotein H3 isoform X5 [Homo sapiens] ;gi|530393534|ref|XP_005269811.1|:PREDICTED: heterogeneous nuclear ribonucleoprotein H3 isoform X7 [Homo sapiens] ;gi|578819373|ref|XP_006717879.1|:PREDICTED: heterogeneous nuclear ribonucleoprotein H3 isoform X8 [Homo sapiens] ;gi|578819376|ref|XP_006717880.1|:PREDICTED: heterogeneous…	1024	0.0279735	10	1.55325	0	6.458e-05	7.25e-05	9.076e-05	7.59467e-05	0	2	2	2	1.5	0	0	0	0	#DIV/0!	0	0	0	0	0
HNRNPLL	gi|20149709|ref|NP_612403.2|:heterogeneous nuclear ribonucleoprotein L-like isoform 1 [Homo sapiens] ;gi|217416379|ref|NP_001136122.1|:heterogeneous nuclear ribonucleoprotein L-like isoform 2 [Homo sapiens] ;gi|578803257|ref|XP_005264696.2|:PREDICTED: heterogeneous nuclear ribonucleoprotein L-like isoform X1 [Homo sapiens] ;gi|578803259|ref|XP_005264697.2|:PREDICTED: heterogeneous nuclear ribonuc…	1024	0.158608	10	0.799674	0	2.562e-05	1.438e-05	0	2e-05	0	2	1	0	0.75	0	0	0	0	#DIV/0!	0	0	0	0	0
HSD17B11	gi|142976729|ref|NP_057329.2|:estradiol 17-beta-dehydrogenase 11 precursor [Homo sapiens] ;gi|578809160|ref|XP_006714295.1|:PREDICTED: estradiol 17-beta-dehydrogenase 11 isoform X1 [Homo sapiens] ;	1024	0.355918	10	0.44865	0	0	7.793e-05	0	7.793e-05	0	0	3	0	0.75	0	0	0	0	#DIV/0!	0	0	0	0	0
HSPA1L	gi|530428354|ref|XP_005275027.1|:PREDICTED: heat shock 70 kDa protein 1-like isoform X1 [Homo sapiens] ;gi|530428362|ref|XP_005275031.1|:PREDICTED: heat shock 70 kDa protein 1-like isoform X5 [Homo sapiens] ;	1024	0.355918	10	0.44865	0	0	0	7.417e-05	7.417e-05	0	0	0	5.35938	1.33984	0	0	0	0	#DIV/0!	0	0	0	0	0
ICMT	PREDICTED: protein-S-isoprenylcysteine O-methyltransferase isoform X1 [Homo sapiens]	1024	0.203351	10	0.691754	0	2.444e-05	0.00030186	6.871e-05	0.00013167	0	1	11	2	3.5	0	0	0	0	#DIV/0!	0	0	0	0	0
KATNB1	gi|530423531|ref|XP_005255829.1|:PREDICTED: katanin p80 WD40 repeat-containing subunit B1 isoform X1 [Homo sapiens] ;gi|83779014|ref|NP_005877.2|:katanin p80 WD40 repeat-containing subunit B1 [Homo sapiens] ;	1024	0.109296	10	0.961396	2.079e-05	2.066e-05	6.958e-05	0	3.701e-05	2	2	6	0	2.5	0	0	0	0	#DIV/0!	0	0	0	0	0
KDELR1	ER lumen protein retaining receptor 1 [Homo sapiens]	1024	0.355918	10	0.44865	6.59e-05	0	0	0	6.59e-05	2	0	0	0	0.5	0	0	0	0	#DIV/0!	0	0	0	0	0
KIAA0922	gi|187608809|ref|NP_056011.3|:transmembrane protein 131-like isoform 2 precursor [Homo sapiens] ;gi|196114949|ref|NP_001124479.1|:transmembrane protein 131-like isoform 1 precursor [Homo sapiens] ;gi|530377432|ref|XP_005262926.1|:PREDICTED: transmembrane protein 131-like isoform X1 [Homo sapiens] ;gi|530377434|ref|XP_005262927.1|:PREDICTED: transmembrane protein 131-like isoform X2 [Homo sapiens]…	1024	0.196244	10	0.707203	1.302e-05	0	4.84e-06	0	8.93e-06	3	0	1	0	1	0	0	0	0	#DIV/0!	0	0	0	0	0
KIF5C	kinesin heavy chain isoform 5C [Homo sapiens]	1024	0.145483	10	0.837187	2.705e-05	0	3.979e-05	0	3.342e-05	3.70588	0	4.88636	0	2.14806	0	0	0	0	#DIV/0!	0	0	0	0	0
KRT13	gi|131412225|ref|NP_705694.2|:keratin, type I cytoskeletal 13 isoform a [Homo sapiens] ;gi|131412228|ref|NP_002265.2|:keratin, type I cytoskeletal 13 isoform b [Homo sapiens] ;	1024	0.355918	10	0.44865	0	0	0	0.00023715	0.00023715	0	0	0	11.1322	2.78305	0	0	0	0	#DIV/0!	0	0	0	0	0
LAGE3	EKC/KEOPS complex subunit LAGE3 [Homo sapiens]	1024	0.158601	10	0.799695	0	9.709e-05	5.45e-05	0	7.5795e-05	0	2	1	0	0.75	0	0	0	0	#DIV/0!	0	0	0	0	0
LIMK2	gi|5031869|ref|NP_005560.1|:LIM domain kinase 2 isoform 2a [Homo sapiens] ;gi|73390140|ref|NP_001026971.1|:LIM domain kinase 2 isoform 1 [Homo sapiens] ;gi|8051618|ref|NP_057952.1|:LIM domain kinase 2 isoform 2b [Homo sapiens] ;	1024	0.355918	10	0.44865	0	2.176e-05	0	0	2.176e-05	0	2	0	0	0.5	0	0	0	0	#DIV/0!	0	0	0	0	0
LMCD1	gi|506325413|ref|NP_001265162.1|:LIM and cysteine-rich domains protein 1 isoform 2 [Homo sapiens] ;gi|506325440|ref|NP_001265163.1|:LIM and cysteine-rich domains protein 1 isoform 3 [Homo sapiens] ;gi|7657309|ref|NP_055398.1|:LIM and cysteine-rich domains protein 1 isoform 1 [Homo sapiens] ;	1024	0.218412	10	0.660723	0	2.377e-05	8.007e-05	0	5.192e-05	0	1	3	0	1	0	0	0	0	#DIV/0!	0	0	0	0	0
LOC100505498	PREDICTED: uncharacterized protein LOC100505498 [Homo sapiens]	1024	0.0358954	10	1.44496	0.00014113	0	7.872e-05	9.855e-05	0.000106133	2	0	1	1	1	0	0	0	0	#DIV/0!	0	0	0	0	0
LTBP4	gi|110347412|ref|NP_003564.2|:latent-transforming growth factor beta-binding protein 4 isoform b [Homo sapiens] ;gi|110347431|ref|NP_001036009.1|:latent-transforming growth factor beta-binding protein 4 isoform a precursor [Homo sapiens] ;gi|110347437|ref|NP_001036010.1|:latent-transforming growth factor beta-binding protein 4 isoform c precursor [Homo sapiens] ;	1024	0.355918	10	0.44865	0	0	9.82e-06	0	9.82e-06	0	0	2	0	0.5	0	0	0	0	#DIV/0!	0	0	0	0	0
LYPLAL1	gi|20270341|ref|NP_620149.1|:lysophospholipase-like protein 1 [Homo sapiens] ;gi|530366025|ref|XP_005273103.1|:PREDICTED: lysophospholipase-like protein 1 isoform X1 [Homo sapiens] ;gi|530366031|ref|XP_005273106.1|:PREDICTED: lysophospholipase-like protein 1 isoform X4 [Homo sapiens] ;gi|578800538|ref|XP_006711225.1|:PREDICTED: lysophospholipase-like protein 1 isoform X5 [Homo sapiens] ;	1024	0.253841	10	0.595439	2.948e-05	0.00014646	0	0	8.797e-05	1	5	0	0	1.5	0	0	0	0	#DIV/0!	0	0	0	0	0
MAGED1	gi|52632379|ref|NP_001005332.1|:melanoma-associated antigen D1 isoform b [Homo sapiens] ;gi|52632381|ref|NP_001005333.1|:melanoma-associated antigen D1 isoform a [Homo sapiens] ;	1024	0.142366	10	0.846594	9.41e-06	9.48e-06	4.007e-05	0	1.96533e-05	1.04762	1.0625	4	0	1.52753	0	0	0	0	#DIV/0!	0	0	0	0	0
MAGT1	magnesium transporter protein 1 [Homo sapiens]	1024	0.167698	10	0.775472	1.903e-05	3.783e-05	0	0	2.843e-05	1	2	0	0	0.75	0	0	0	0	#DIV/0!	0	0	0	0	0
MAOA	amine oxidase [flavin-containing] A isoform 1 [Homo sapiens]	1024	0.136332	10	0.865403	0	5.269e-05	4.436e-05	0	4.8525e-05	0	4	3	0	1.75	0	0	0	0	#DIV/0!	0	0	0	0	0
MAP2K7	gi|21735544|ref|NP_660186.1|:dual specificity mitogen-activated protein kinase kinase 7 [Homo sapiens] ;gi|530427524|ref|XP_005272546.1|:PREDICTED: dual specificity mitogen-activated protein kinase kinase 7 isoform X1 [Homo sapiens] ;	1024	0.0624339	10	1.20458	3.334e-05	8.284e-05	0.0001116	0	7.59267e-05	2	5	6	0	3.25	0	0	0	0	#DIV/0!	0	0	0	0	0
MAP3K1	mitogen-activated protein kinase kinase kinase 1 [Homo sapiens]	1024	0.158647	10	0.799568	0	9.18e-06	5.15e-06	0	7.165e-06	0	2	1	0	0.75	0	0	0	0	#DIV/0!	0	0	0	0	0
MBOAT2	lysophospholipid acyltransferase 2 [Homo sapiens]	1024	0.355918	10	0.44865	0	2.67e-05	0	0	2.67e-05	0	2	0	0	0.5	0	0	0	0	#DIV/0!	0	0	0	0	0
MGST1	gi|386869519|ref|NP_001247440.1|:microsomal glutathione S-transferase 1 isoform a [Homo sapiens] ;gi|390125204|ref|NP_001254527.1|:microsomal glutathione S-transferase 1 isoform c [Homo sapiens] ;gi|578822875|ref|XP_006719142.1|:PREDICTED: microsomal glutathione S-transferase 1 isoform X1 [Homo sapiens] ;gi|578822877|ref|XP_006719143.1|:PREDICTED: microsomal glutathione S-transferase 1 isoform X2…	1024	0.0104745	10	1.97987	0.00031548	8.957e-05	0.00020112	0.0001259	0.000183018	7	2	4	2	3.75	0	0	0	0	#DIV/0!	0	0	0	0	0
MIF	macrophage migration inhibitory factor [Homo sapiens]	1024	0.135045	10	0.869523	0	0.00012073	0.00013554	0	0.000128135	0	2	2	0	1	0	0	0	0	#DIV/0!	0	0	0	0	0
MIPOL1	gi|530403141|ref|XP_005267410.1|:PREDICTED: mirror-image polydactyly gene 1 protein isoform X2 [Homo sapiens] ;gi|578825518|ref|XP_006720108.1|:PREDICTED: mirror-image polydactyly gene 1 protein isoform X3 [Homo sapiens] ;	1024	0.0459127	10	1.33807	3.828e-05	1.902e-05	2.135e-05	0	2.62167e-05	2	1	1	0	1	0	0	0	0	#DIV/0!	0	0	0	0	0
MLF1	gi|11967975|ref|NP_071888.1|:myeloid leukemia factor 1 isoform 1 [Homo sapiens] ;gi|194328680|ref|NP_001123629.1|:myeloid leukemia factor 1 isoform 2 [Homo sapiens] ;gi|306482665|ref|NP_001182361.1|:myeloid leukemia factor 1 isoform 3 [Homo sapiens] ;gi|306482667|ref|NP_001182362.1|:myeloid leukemia factor 1 isoform 4 [Homo sapiens] ;gi|530374668|ref|XP_005247536.1|:PREDICTED: myeloid leukemia fa…	1024	0.0370739	10	1.43093	7.82e-05	0	5.816e-05	0.00010922	8.186e-05	3	0	2	3	2	0	0	0	0	#DIV/0!	0	0	0	0	0
MLLT11	protein AF1q [Homo sapiens]	1024	0.0017612	10	2.75419	0.00100905	0.00053993	0.00069275	0.00043364	0.000668842	13	7	8	4	8	0	0	0	0	#DIV/0!	0	0	0	0	0
MPLKIP	M-phase-specific PLK1-interacting protein [Homo sapiens]	1024	0.355918	10	0.44865	0	0	0.00030477	0	0.00030477	0	0	7	0	1.75	0	0	0	0	#DIV/0!	0	0	0	0	0
MRPL14	gi|530382396|ref|XP_005249356.1|:PREDICTED: 39S ribosomal protein L14, mitochondrial isoform X1 [Homo sapiens] ;gi|530382400|ref|XP_005249358.1|:PREDICTED: 39S ribosomal protein L14, mitochondrial isoform X3 [Homo sapiens] ;	1024	4.1816e-05	10	4.37866	0.00010584	7.012e-05	7.872e-05	9.855e-05	8.83075e-05	3	2	2	2	2.25	0	0	0	0	#DIV/0!	0	0	0	0	0
MRPS24	28S ribosomal protein S24, mitochondrial precursor [Homo sapiens]	1024	0.355918	10	0.44865	8.366e-05	0	0	0	8.366e-05	2	0	0	0	0.5	0	0	0	0	#DIV/0!	0	0	0	0	0
MRPS34	gi|13027604|ref|NP_076425.1|:28S ribosomal protein S34, mitochondrial [Homo sapiens] ;gi|530408953|ref|XP_005255568.1|:PREDICTED: 28S ribosomal protein S34, mitochondrial isoform X1 [Homo sapiens] ;gi|530408956|ref|XP_005255569.1|:PREDICTED: 28S ribosomal protein S34, mitochondrial isoform X2 [Homo sapiens] ;	1024	0.135044	10	0.869525	0	6.369e-05	7.15e-05	0	6.7595e-05	0	2	2	0	1	0	0	0	0	#DIV/0!	0	0	0	0	0
MRPS6	28S ribosomal protein S6, mitochondrial [Homo sapiens]	1024	0.0375419	10	1.42548	0.00011177	0.00011107	0.00018704	0	0.000136627	2	2	3	0	1.75	0	0	0	0	#DIV/0!	0	0	0	0	0
MTG1	mitochondrial ribosome-associated GTPase 1 [Homo sapiens]	1024	0.135045	10	0.869522	0	4.157e-05	4.667e-05	0	4.412e-05	0	2	2	0	1	0	0	0	0	#DIV/0!	0	0	0	0	0
MTMR1	gi|530422973|ref|XP_005274822.1|:PREDICTED: myotubularin-related protein 1 isoform X1 [Homo sapiens] ;gi|530422975|ref|XP_005274823.1|:PREDICTED: myotubularin-related protein 1 isoform X2 [Homo sapiens] ;gi|530422977|ref|XP_005274824.1|:PREDICTED: myotubularin-related protein 1 isoform X3 [Homo sapiens] ;gi|530422979|ref|XP_005274825.1|:PREDICTED: myotubularin-related protein 1 isoform X4 [Homo s…	1024	0.143635	10	0.842738	0	1.986e-05	0	1.396e-05	1.691e-05	0	2	0	1	0.75	0	0	0	0	#DIV/0!	0	0	0	0	0
MTSS1L	gi|46195763|ref|NP_612392.1|:MTSS1-like protein [Homo sapiens] ;gi|530424502|ref|XP_005256293.1|:PREDICTED: MTSS1-like protein isoform X1 [Homo sapiens] ;gi|578829363|ref|XP_006721398.1|:PREDICTED: MTSS1-like protein isoform X2 [Homo sapiens] ;gi|578829365|ref|XP_006721399.1|:PREDICTED: MTSS1-like protein isoform X3 [Homo sapiens] ;	1024	0.355918	10	0.44865	0	1.859e-05	0	0	1.859e-05	0	2	0	0	0.5	0	0	0	0	#DIV/0!	0	0	0	0	0
MVB12A	multivesicular body subunit 12A [Homo sapiens]	1024	0.195585	10	0.708665	0	7.629e-05	2.855e-05	0	5.242e-05	0	3	1	0	1	0	0	0	0	#DIV/0!	0	0	0	0	0
MYL6B	myosin light chain 6B [Homo sapiens]	1024	0.0254428	10	1.59443	9.033e-05	8.729e-05	0.00010616	0	9.45933e-05	2.68966	2.61538	2.83333	0	2.03459	0	0	0	0	#DIV/0!	0	0	0	0	0
NAA16	gi|160707985|ref|NP_001104268.1|:N-alpha-acetyltransferase 16, NatA auxiliary subunit isoform 3 [Homo sapiens] ;gi|33356128|ref|NP_078837.3|:N-alpha-acetyltransferase 16, NatA auxiliary subunit isoform 1 [Homo sapiens] ;gi|530402639|ref|XP_005266579.1|:PREDICTED: N-alpha-acetyltransferase 16, NatA auxiliary subunit isoform X1 [Homo sapiens] ;	1024	0.355918	10	0.44865	3.257e-05	0	0	0	3.257e-05	2	0	0	0	0.5	0	0	0	0	#DIV/0!	0	0	0	0	0
NAA40	gi|189571650|ref|NP_079047.2|:N-alpha-acetyltransferase 40 [Homo sapiens] ;gi|530397391|ref|XP_005274353.1|:PREDICTED: N-alpha-acetyltransferase 40 isoform X2 [Homo sapiens] ;gi|578821736|ref|XP_006718752.1|:PREDICTED: N-alpha-acetyltransferase 40 isoform X3 [Homo sapiens] ;	1024	0.355918	10	0.44865	0	0	0	8.234e-05	8.234e-05	0	0	0	2	0.5	0	0	0	0	#DIV/0!	0	0	0	0	0
NADK	gi|312222777|ref|NP_001185923.1|:NAD kinase isoform 2 [Homo sapiens] ;gi|578799623|ref|XP_006710900.1|:PREDICTED: NAD kinase isoform X4 [Homo sapiens] ;gi|578799627|ref|XP_006710902.1|:PREDICTED: NAD kinase isoform X6 [Homo sapiens] ;	1024	0.135044	10	0.869526	0	2.349e-05	2.637e-05	0	2.493e-05	0	2	2	0	1	0	0	0	0	#DIV/0!	0	0	0	0	0
NADK2	gi|146134341|ref|NP_001078880.1|:NAD kinase 2, mitochondrial isoform 1 [Homo sapiens] ;gi|530378682|ref|XP_005248298.1|:PREDICTED: NAD kinase 2, mitochondrial isoform X1 [Homo sapiens] ;gi|565324137|ref|NP_001274269.1|:NAD kinase 2, mitochondrial isoform 2 [Homo sapiens] ;gi|565324193|ref|NP_001274270.1|:NAD kinase 2, mitochondrial isoform 3 [Homo sapiens] ;	1024	0.133977	10	0.872969	1.58e-05	1.571e-05	0	0	1.5755e-05	1	1	0	0	0.5	0	0	0	0	#DIV/0!	0	0	0	0	0
NDC80	kinetochore protein NDC80 homolog [Homo sapiens]	1024	0.0245537	10	1.60988	2.176e-05	2.163e-05	2.428e-05	0	2.25567e-05	2	2	2	0	1.5	0	0	0	0	#DIV/0!	0	0	0	0	0
NDRG1	gi|207028748|ref|NP_001128714.1|:protein NDRG1 isoform 1 [Homo sapiens] ;gi|386643032|ref|NP_001245361.1|:protein NDRG1 isoform 2 [Homo sapiens] ;gi|386643034|ref|NP_001245362.1|:protein NDRG1 isoform 3 [Homo sapiens] ;	1024	0.0256021	10	1.59173	5.319e-05	3.524e-05	0.00015824	7.429e-05	8.024e-05	3	2	8	3	4	0	0	0	0	#DIV/0!	0	0	0	0	0
NDUFS6	NADH dehydrogenase [ubiquinone] iron-sulfur protein 6, mitochondrial precursor [Homo sapiens]	1024	0.0301991	10	1.52001	0.00016901	0.00011197	0.0001257	0	0.00013556	3	2	2	0	1.75	0	0	0	0	#DIV/0!	0	0	0	0	0
NDUFS7	NADH dehydrogenase [ubiquinone] iron-sulfur protein 7, mitochondrial [Homo sapiens]	1024	0.103926	10	0.983275	0.00016398	0.00029332	0	4.581e-05	0.000167703	5	9	0	1	3.75	0	0	0	0	#DIV/0!	0	0	0	0	0
NDUFS8	gi|530396820|ref|XP_005274071.1|:PREDICTED: NADH dehydrogenase [ubiquinone] iron-sulfur protein 8, mitochondrial isoform X2 [Homo sapiens] ;gi|530396822|ref|XP_005274072.1|:PREDICTED: NADH dehydrogenase [ubiquinone] iron-sulfur protein 8, mitochondrial isoform X3 [Homo sapiens] ;	1024	0.355918	10	0.44865	0	0	7.422e-05	0	7.422e-05	0	0	2	0	0.5	0	0	0	0	#DIV/0!	0	0	0	0	0
NDUFV1	gi|20149568|ref|NP_009034.2|:NADH dehydrogenase [ubiquinone] flavoprotein 1, mitochondrial isoform 1 precursor [Homo sapiens] ;gi|260656005|ref|NP_001159574.1|:NADH dehydrogenase [ubiquinone] flavoprotein 1, mitochondrial isoform 2 precursor [Homo sapiens] ;	1024	0.134931	10	0.869888	3.011e-05	0	3.359e-05	0	3.185e-05	2	0	2	0	1	0	0	0	0	#DIV/0!	0	0	0	0	0
NECAP2	gi|223942032|ref|NP_001138749.1|:adaptin ear-binding coat-associated protein 2 isoform 2 [Homo sapiens] ;gi|8922416|ref|NP_060560.1|:adaptin ear-binding coat-associated protein 2 isoform 1 [Homo sapiens] ;	1024	0.0286028	10	1.54359	0	0.00010171	0.00014274	0.00010722	0.000117223	0	4	5	3	3	0	0	0	0	#DIV/0!	0	0	0	0	0
NEMF	gi|32130516|ref|NP_004704.2|:nuclear export mediator factor NEMF [Homo sapiens] ;gi|530404901|ref|XP_005268256.1|:PREDICTED: nuclear export mediator factor NEMF isoform X1 [Homo sapiens] ;gi|530404903|ref|XP_005268257.1|:PREDICTED: nuclear export mediator factor NEMF isoform X2 [Homo sapiens] ;gi|530404905|ref|XP_005268258.1|:PREDICTED: nuclear export mediator factor NEMF isoform X3 [Homo sapiens…	1024	0.0784048	10	1.10566	6.49e-06	0	7.24e-06	1.814e-05	1.06233e-05	1	0	1	2	1	0	0	0	0	#DIV/0!	0	0	0	0	0
NIN	ninein isoform 2 [Homo sapiens]	1024	0.00272435	10	2.56474	0.00011135	0.0001074	0.00016442	5.489e-05	0.000109515	34	33	45	12	31	0	0	0	0	#DIV/0!	0	0	0	0	0
NINL	gi|530425644|ref|XP_005260735.1|:PREDICTED: ninein-like protein isoform X1 [Homo sapiens] ;gi|578835370|ref|XP_006723615.1|:PREDICTED: ninein-like protein isoform X4 [Homo sapiens] ;	1024	0.0085521	10	2.06793	3.998e-05	2.979e-05	3.345e-05	6.98e-06	2.755e-05	8	6	6	1	5.25	0	0	0	0	#DIV/0!	0	0	0	0	0
ORC1	gi|299890793|ref|NP_001177747.1|:origin recognition complex subunit 1 isoform 1 [Homo sapiens] ;gi|299890795|ref|NP_001177748.1|:origin recognition complex subunit 1 isoform 2 [Homo sapiens] ;	1024	0.355918	10	0.44865	0	1.613e-05	0	0	1.613e-05	0	2	0	0	0.5	0	0	0	0	#DIV/0!	0	0	0	0	0
OXR1	gi|194306541|ref|NP_060472.2|:oxidation resistance protein 1 isoform 1 [Homo sapiens] ;gi|194306543|ref|NP_851999.2|:oxidation resistance protein 1 isoform 2 [Homo sapiens] ;gi|309384265|ref|NP_001185461.1|:oxidation resistance protein 1 isoform 3 [Homo sapiens] ;gi|309384267|ref|NP_001185462.1|:oxidation resistance protein 1 isoform 4 [Homo sapiens] ;gi|530389178|ref|XP_005251050.1|:PREDICTED: o…	1024	0.355918	10	0.44865	0	1.641e-05	0	0	1.641e-05	0	2	0	0	0.5	0	0	0	0	#DIV/0!	0	0	0	0	0
PAPSS2	gi|34447231|ref|NP_004661.2|:bifunctional 3'-phosphoadenosine 5'-phosphosulfate synthase 2 isoform a [Homo sapiens] ;gi|62912492|ref|NP_001015880.1|:bifunctional 3'-phosphoadenosine 5'-phosphosulfate synthase 2 isoform b [Homo sapiens] ;	1024	0.355918	10	0.44865	2.275e-05	0	0	0	2.275e-05	2	0	0	0	0.5	0	0	0	0	#DIV/0!	0	0	0	0	0
PARK7	PREDICTED: protein DJ-1 isoform X1 [Homo sapiens]	1024	0.355918	10	0.44865	0.00018481	0	0	0	0.00018481	5	0	0	0	1.25	0	0	0	0	#DIV/0!	0	0	0	0	0
PDCL	phosducin-like protein [Homo sapiens]	1024	0.00140091	10	2.85359	0.00011604	9.225e-05	0.00015535	6.483e-05	0.000107118	5	4	6	2	4.25	0	0	0	0	#DIV/0!	0	0	0	0	0
PDHX	gi|203098753|ref|NP_003468.2|:pyruvate dehydrogenase protein X component, mitochondrial isoform 1 precursor [Homo sapiens] ;gi|203098816|ref|NP_001128496.1|:pyruvate dehydrogenase protein X component, mitochondrial isoform 2 [Homo sapiens] ;	1024	0.0279777	10	1.55319	0	2.771e-05	3.111e-05	3.895e-05	3.259e-05	0	2	2	2	1.5	0	0	0	0	#DIV/0!	0	0	0	0	0
PDRG1	PREDICTED: p53 and DNA damage-regulated protein 1 isoform X1 [Homo sapiens]	1024	0.0644184	10	1.19099	0.00031515	0.00015659	0.00011719	0	0.00019631	6	3	2	0	2.75	0	0	0	0	#DIV/0!	0	0	0	0	0
PFDN1	gi|21536449|ref|NP_002613.2|:prefoldin subunit 1 [Homo sapiens] ;gi|530380590|ref|XP_005268522.1|:PREDICTED: prefoldin subunit 1 isoform X1 [Homo sapiens] ;	1024	0.000388513	10	3.41059	0.00160328	0.00182086	0.00255522	0.00135957	0.00183473	28	32	40	17	29.25	0	0	0	0	#DIV/0!	0	0	0	0	0
PHKB	gi|4505783|ref|NP_000284.1|:phosphorylase b kinase regulatory subunit beta isoform a [Homo sapiens] ;gi|530423974|ref|XP_005256040.1|:PREDICTED: phosphorylase b kinase regulatory subunit beta isoform X1 [Homo sapiens] ;gi|530423976|ref|XP_005256041.1|:PREDICTED: phosphorylase b kinase regulatory subunit beta isoform X2 [Homo sapiens] ;	1024	0.0307617	10	1.51199	0	1.27e-05	1.426e-05	8.93e-06	1.19633e-05	0	2	2	1	1.25	0	0	0	0	#DIV/0!	0	0	0	0	0
PIP	prolactin-inducible protein precursor [Homo sapiens]	1024	0.355918	10	0.44865	0	0.00014264	0	0	0.00014264	0	3	0	0	0.75	0	0	0	0	#DIV/0!	0	0	0	0	0
PJA2	E3 ubiquitin-protein ligase Praja-2 [Homo sapiens]	1024	0.135048	10	0.869511	0	1.961e-05	2.202e-05	0	2.0815e-05	0	2	2	0	1	0	0	0	0	#DIV/0!	0	0	0	0	0
PKN1	gi|47132589|ref|NP_002732.3|:serine/threonine-protein kinase N1 isoform 2 [Homo sapiens] ;gi|47132591|ref|NP_998725.1|:serine/threonine-protein kinase N1 isoform 1 [Homo sapiens] ;	1024	0.355918	10	0.44865	2.225e-05	0	0	0	2.225e-05	3	0	0	0	0.75	0	0	0	0	#DIV/0!	0	0	0	0	0
PPA1	inorganic pyrophosphatase [Homo sapiens]	1024	0.355918	10	0.44865	0	4.804e-05	0	0	4.804e-05	0	2	0	0	0.5	0	0	0	0	#DIV/0!	0	0	0	0	0
PPIA	peptidyl-prolyl cis-trans isomerase A [Homo sapiens]	1024	0.125311	10	0.90201	0	4.207e-05	0.00018893	5.913e-05	9.671e-05	0	1	4	1	1.5	0	0	0	0	#DIV/0!	0	0	0	0	0
PPP4R1	gi|108936953|ref|NP_001035847.1|:serine/threonine-protein phosphatase 4 regulatory subunit 1 isoform a [Homo sapiens] ;gi|4826934|ref|NP_005125.1|:serine/threonine-protein phosphatase 4 regulatory subunit 1 isoform b [Homo sapiens] ;	1024	0.102161	10	0.990716	5.147e-05	2.923e-05	8.2e-06	0	2.96333e-05	7	4	1	0	3	0	0	0	0	#DIV/0!	0	0	0	0	0
PPT1	gi|217272890|ref|NP_001136076.1|:palmitoyl-protein thioesterase 1 isoform 2 precursor [Homo sapiens] ;gi|4506031|ref|NP_000301.1|:palmitoyl-protein thioesterase 1 isoform 1 precursor [Homo sapiens] ;gi|530362925|ref|XP_005271064.1|:PREDICTED: palmitoyl-protein thioesterase 1 isoform X1 [Homo sapiens] ;gi|530362927|ref|XP_005271065.1|:PREDICTED: palmitoyl-protein thioesterase 1 isoform X2 [Homo sa…	1024	0.178753	10	0.747748	0	6.839e-05	0.00015356	0	0.000110975	0	2	4	0	1.5	0	0	0	0	#DIV/0!	0	0	0	0	0
PSAT1	gi|10863955|ref|NP_066977.1|:phosphoserine aminotransferase isoform 2 [Homo sapiens] ;gi|17402893|ref|NP_478059.1|:phosphoserine aminotransferase isoform 1 [Homo sapiens] ;	1024	0.355918	10	0.44865	0.00015093	0	0	0	0.00015093	7	0	0	0	1.75	0	0	0	0	#DIV/0!	0	0	0	0	0
PSMB1	proteasome subunit beta type-1 [Homo sapiens]	1024	0.0862826	10	1.06408	2.899e-05	8.642e-05	3.234e-05	0	4.925e-05	1	3	1	0	1.25	0	0	0	0	#DIV/0!	0	0	0	0	0
PSMB2	proteasome subunit beta type-2 isoform 1 [Homo sapiens]	1024	0.146504	10	0.834149	0	0.00010361	0.00015509	0	0.00012935	0	3	4	0	1.75	0	0	0	0	#DIV/0!	0	0	0	0	0
PSMB5	proteasome subunit beta type-5 isoform 1 [Homo sapiens]	1024	0.159093	10	0.79835	0.00010625	0	5.927e-05	0	8.276e-05	4	0	2	0	1.5	0	0	0	0	#DIV/0!	0	0	0	0	0
PTDSS2	gi|13540555|ref|NP_110410.1|:phosphatidylserine synthase 2 [Homo sapiens] ;gi|530395841|ref|XP_005253210.1|:PREDICTED: phosphatidylserine synthase 2 isoform X1 [Homo sapiens] ;	1024	0.133978	10	0.872967	1.434e-05	1.425e-05	0	0	1.4295e-05	1	1	0	0	0.5	0	0	0	0	#DIV/0!	0	0	0	0	0
PTGR1	gi|226056130|ref|NP_001139581.1|:prostaglandin reductase 1 isoform 2 [Homo sapiens] ;gi|226059159|ref|NP_001139580.1|:prostaglandin reductase 1 isoform 1 [Homo sapiens] ;	1024	0.0566366	10	1.2469	2.321e-05	6.919e-05	5.178e-05	0	4.806e-05	1	3	2	0	1.5	0	0	0	0	#DIV/0!	0	0	0	0	0
PTPN3	gi|223941879|ref|NP_001138840.1|:tyrosine-protein phosphatase non-receptor type 3 isoform 2 [Homo sapiens] ;gi|578817687|ref|XP_006717260.1|:PREDICTED: tyrosine-protein phosphatase non-receptor type 3 isoform X1 [Homo sapiens] ;gi|578817691|ref|XP_006717262.1|:PREDICTED: tyrosine-protein phosphatase non-receptor type 3 isoform X3 [Homo sapiens] ;gi|578817693|ref|XP_006717263.1|:PREDICTED: tyrosin…	1024	0.143667	10	0.842642	0	1.6e-05	0	1.124e-05	1.362e-05	0	2	0	1	0.75	0	0	0	0	#DIV/0!	0	0	0	0	0
RAB13	gi|440309849|ref|NP_001258967.1|:ras-related protein Rab-13 isoform 2 [Homo sapiens] ;gi|4506363|ref|NP_002861.1|:ras-related protein Rab-13 isoform 1 [Homo sapiens] ;	1024	0.355918	10	0.44865	0	0.0001138	0	0	0.0001138	0	2	0	0	0.5	0	0	0	0	#DIV/0!	0	0	0	0	0
RAB18	gi|10880989|ref|NP_067075.1|:ras-related protein Rab-18 isoform 1 [Homo sapiens] ;gi|374081854|ref|NP_001243339.1|:ras-related protein Rab-18 isoform 2 [Homo sapiens] ;gi|374081858|ref|NP_001243341.1|:ras-related protein Rab-18 isoform 5 [Homo sapiens] ;	1024	0.134931	10	0.869887	6.782e-05	0	7.566e-05	0	7.174e-05	2	0	2	0	1	0	0	0	0	#DIV/0!	0	0	0	0	0
RAB7L1	gi|208609964|ref|NP_001129135.1|:ras-related protein Rab-7L1 isoform 2 [Homo sapiens] ;gi|578801661|ref|XP_006711667.1|:PREDICTED: ras-related protein Rab-7L1 isoform X6 [Homo sapiens] ;gi|578801665|ref|XP_006711669.1|:PREDICTED: ras-related protein Rab-7L1 isoform X8 [Homo sapiens] ;	1024	0.0696757	10	1.15692	3.903e-05	0.00015513	0.00013062	0	0.00010826	1	4	3	0	2	0	0	0	0	#DIV/0!	0	0	0	0	0
RANBP10	gi|40538736|ref|NP_065901.1|:ran-binding protein 10 [Homo sapiens] ;gi|530424156|ref|XP_005256127.1|:PREDICTED: ran-binding protein 10 isoform X1 [Homo sapiens] ;	1024	0.13532	10	0.868638	0	2.453e-05	2.793e-05	0	2.623e-05	0	2.19048	2.22222	0	1.10317	0	0	0	0	#DIV/0!	0	0	0	0	0
RASEF	gi|40255119|ref|NP_689786.2|:ras and EF-hand domain-containing protein [Homo sapiens] ;gi|530390577|ref|XP_005251787.1|:PREDICTED: ras and EF-hand domain-containing protein isoform X1 [Homo sapiens] ;	1024	1.79742e-05	10	4.74535	3.776e-05	3.752e-05	3.159e-05	2.637e-05	3.331e-05	4	4	3	2	3.25	0	0	0	0	#DIV/0!	0	0	0	0	0
RGS12	gi|38327599|ref|NP_937870.1|:regulator of G-protein signaling 12 isoform 3 [Homo sapiens] ;gi|4506509|ref|NP_002917.1|:regulator of G-protein signaling 12 isoform 2 [Homo sapiens] ;gi|578808211|ref|XP_006713968.1|:PREDICTED: regulator of G-protein signaling 12 isoform X1 [Homo sapiens] ;gi|578808213|ref|XP_006713969.1|:PREDICTED: regulator of G-protein signaling 12 isoform X2 [Homo sapiens] ;gi|5…	1024	4.17143e-05	10	4.37972	2.623e-05	1.738e-05	1.951e-05	2.442e-05	2.1885e-05	3	2	2	2	2.25	0	0	0	0	#DIV/0!	0	0	0	0	0
RIPK1	gi|530382726|ref|XP_005249514.1|:PREDICTED: receptor-interacting serine/threonine-protein kinase 1 isoform X1 [Homo sapiens] ;gi|530382728|ref|XP_005249515.1|:PREDICTED: receptor-interacting serine/threonine-protein kinase 1 isoform X2 [Homo sapiens] ;gi|578812028|ref|XP_006715299.1|:PREDICTED: receptor-interacting serine/threonine-protein kinase 1 isoform X3 [Homo sapiens] ;	1024	0.355918	10	0.44865	1.661e-05	0	0	0	1.661e-05	2	0	0	0	0.5	0	0	0	0	#DIV/0!	0	0	0	0	0
RPF2	gi|39930469|ref|NP_115570.1|:ribosome production factor 2 homolog isoform 1 [Homo sapiens] ;gi|574286143|ref|NP_001276040.1|:ribosome production factor 2 homolog isoform 2 [Homo sapiens] ;	1024	0.355918	10	0.44865	0	0	5.094e-05	0	5.094e-05	0	0	2	0	0.5	0	0	0	0	#DIV/0!	0	0	0	0	0
RPL35A	gi|530375912|ref|XP_005269407.1|:PREDICTED: 60S ribosomal protein L35a isoform X1 [Homo sapiens] ;gi|530375914|ref|XP_005269408.1|:PREDICTED: 60S ribosomal protein L35a isoform X2 [Homo sapiens] ;	1024	0.135043	10	0.869527	0	0.00014463	0.00016236	0	0.000153495	0	3	3	0	1.5	0	0	0	0	#DIV/0!	0	0	0	0	0
RPL39	60S ribosomal protein L39 [Homo sapiens]	1024	0.355918	10	0.44865	0	0	0.00030562	0	0.00030562	0	0	2	0	0.5	0	0	0	0	#DIV/0!	0	0	0	0	0
RPL3L	60S ribosomal protein L3-like [Homo sapiens]	1024	0.355918	10	0.44865	0	0	2.073e-05	0	2.073e-05	0	0	1.08235	0	0.270588	0	0	0	0	#DIV/0!	0	0	0	0	0
RPS28	40S ribosomal protein S28 [Homo sapiens]	1024	0.140568	10	0.852113	0	0.00030183	0.0002259	0	0.000263865	0	3	2	0	1.25	0	0	0	0	#DIV/0!	0	0	0	0	0
RPTOR	gi|22094987|ref|NP_065812.1|:regulatory-associated protein of mTOR isoform 1 [Homo sapiens] ;gi|251823858|ref|NP_001156506.1|:regulatory-associated protein of mTOR isoform 2 [Homo sapiens] ;	1024	0.158572	10	0.799773	0	2.08e-05	1.168e-05	0	1.624e-05	0	4	2	0	1.5	0	0	0	0	#DIV/0!	0	0	0	0	0
RRAGD	gi|11034847|ref|NP_067067.1|:ras-related GTP-binding protein D [Homo sapiens] ;gi|11995472|ref|NP_071440.1|:ras-related GTP-binding protein C isoform 1 [Homo sapiens] ;gi|427918102|ref|NP_001258780.1|:ras-related GTP-binding protein C isoform 2 [Homo sapiens] ;gi|530383216|ref|XP_005248812.1|:PREDICTED: ras-related GTP-binding protein D isoform X1 [Homo sapiens] ;	1024	0.168757	10	0.772739	3.493e-05	1.736e-05	0	0	2.6145e-05	2	1	0	0	0.75	0	0	0	0	#DIV/0!	0	0	0	0	0
RSU1	gi|34577083|ref|NP_689937.2|:ras suppressor protein 1 isoform 2 [Homo sapiens] ;gi|6912638|ref|NP_036557.1|:ras suppressor protein 1 isoform 1 [Homo sapiens] ;	1024	2.0074e-07	10	6.69737	9.356e-05	9.297e-05	0.00010438	8.712e-05	9.45075e-05	3	3	3	2	2.75	0	0	0	0	#DIV/0!	0	0	0	0	0
RUFY1	gi|530381215|ref|XP_005266050.1|:PREDICTED: RUN and FYVE domain-containing protein 1 isoform X1 [Homo sapiens] ;gi|94721332|ref|NP_001035541.1|:RUN and FYVE domain-containing protein 1 isoform b [Homo sapiens] ;gi|94721336|ref|NP_079434.3|:RUN and FYVE domain-containing protein 1 isoform a [Homo sapiens] ;	1024	0.0359932	10	1.44378	7.512e-05	4.479e-05	8.38e-05	0	6.79033e-05	5	3	5	0	3.25	0	0	0	0	#DIV/0!	0	0	0	0	0
SASH1	gi|45935385|ref|NP_056093.3|:SAM and SH3 domain-containing protein 1 [Homo sapiens] ;gi|530383481|ref|XP_005266931.1|:PREDICTED: SAM and SH3 domain-containing protein 1 isoform X1 [Homo sapiens] ;gi|530383483|ref|XP_005266932.1|:PREDICTED: SAM and SH3 domain-containing protein 1 isoform X2 [Homo sapiens] ;gi|578812566|ref|XP_006715469.1|:PREDICTED: SAM and SH3 domain-containing protein 1 isoform …	1024	0.355918	10	0.44865	0	1.113e-05	0	0	1.113e-05	0	2	0	0	0.5	0	0	0	0	#DIV/0!	0	0	0	0	0
SBF1	gi|239735519|ref|NP_002963.2|:myotubularin-related protein 5 [Homo sapiens] ;gi|530420843|ref|XP_005261988.1|:PREDICTED: myotubularin-related protein 5 isoform X1 [Homo sapiens] ;gi|530420845|ref|XP_005261989.1|:PREDICTED: myotubularin-related protein 5 isoform X2 [Homo sapiens] ;gi|530420849|ref|XP_005261991.1|:PREDICTED: myotubularin-related protein 5 isoform X4 [Homo sapiens] ;gi|530420851|ref…	1024	0.355918	10	0.44865	7.38e-06	0	0	0	7.38e-06	2	0	0	0	0.5	0	0	0	0	#DIV/0!	0	0	0	0	0
SCD	acyl-CoA desaturase [Homo sapiens]	1024	0.0804941	10	1.09424	7.784e-05	3.867e-05	2.171e-05	0	4.60733e-05	4	2	1	0	1.75	0	0	0	0	#DIV/0!	0	0	0	0	0
SERPINB4	gi|28076869|ref|NP_002965.1|:serpin B4 [Homo sapiens] ;gi|5902072|ref|NP_008850.1|:serpin B3 [Homo sapiens] ;	1024	0.199989	10	0.698994	1.791e-05	0	0	5.004e-05	3.3975e-05	1	0	0	2	0.75	0	0	0	0	#DIV/0!	0	0	0	0	0
SH3GL2	gi|4506931|ref|NP_003017.1|:endophilin-A1 [Homo sapiens] ;gi|530390083|ref|XP_005251606.1|:PREDICTED: endophilin-A1 isoform X1 [Homo sapiens] ;	1024	0.043864	10	1.35789	2.345e-05	4.226e-05	5.36e-05	0	3.977e-05	1.18182	2.14286	2.42105	0	1.43643	0	0	0	0	#DIV/0!	0	0	0	0	0
SIMC1	gi|196259796|ref|NP_940969.3|:SUMO-interacting motif-containing protein 1 [Homo sapiens] ;gi|530381044|ref|XP_005265966.1|:PREDICTED: SUMO-interacting motif-containing protein 1 isoform X1 [Homo sapiens] ;	1024	0.0279752	10	1.55323	0	3.038e-05	3.411e-05	4.27e-05	3.573e-05	0	2	2	2	1.5	0	0	0	0	#DIV/0!	0	0	0	0	0
SIRT2	gi|13775600|ref|NP_036369.2|:NAD-dependent protein deacetylase sirtuin-2 isoform 1 [Homo sapiens] ;gi|300797705|ref|NP_001180215.1|:NAD-dependent protein deacetylase sirtuin-2 isoform 3 [Homo sapiens] ;gi|578834181|ref|XP_006723174.1|:PREDICTED: NAD-dependent protein deacetylase sirtuin-2 isoform X1 [Homo sapiens] ;	1024	0.158616	10	0.799652	0	3.569e-05	2.003e-05	0	2.786e-05	0	2	1	0	0.75	0	0	0	0	#DIV/0!	0	0	0	0	0
SLC1A3	gi|262359914|ref|NP_001160167.1|:excitatory amino acid transporter 1 isoform 2 [Homo sapiens] ;gi|578809962|ref|XP_006714551.1|:PREDICTED: excitatory amino acid transporter 1 isoform X2 [Homo sapiens] ;	1024	0.140757	10	0.851529	5.622e-05	4.19e-05	0	0	4.906e-05	4	3	0	0	1.75	0	0	0	0	#DIV/0!	0	0	0	0	0
SLC25A22	mitochondrial glutamate carrier 1 [Homo sapiens]	1024	0.355918	10	0.44865	4.326e-05	0	0	0	4.326e-05	2	0	0	0	0.5	0	0	0	0	#DIV/0!	0	0	0	0	0
SLC25A32	mitochondrial folate transporter/carrier [Homo sapiens]	1024	0.355918	10	0.44865	4.435e-05	0	0	0	4.435e-05	2	0	0	0	0.5	0	0	0	0	#DIV/0!	0	0	0	0	0
SLC27A4	long-chain fatty acid transport protein 4 [Homo sapiens]	1024	0.135046	10	0.869519	0	2.159e-05	2.424e-05	0	2.2915e-05	0	2	2	0	1	0	0	0	0	#DIV/0!	0	0	0	0	0
SLC39A9	gi|356460995|ref|NP_001239077.1|:zinc transporter ZIP9 isoform 2 [Homo sapiens] ;gi|356461001|ref|NP_001239079.1|:zinc transporter ZIP9 isoform 3 [Homo sapiens] ;gi|40254928|ref|NP_060845.2|:zinc transporter ZIP9 isoform 1 [Homo sapiens] ;	1024	0.0279824	10	1.55312	0	2.444e-05	2.744e-05	3.436e-05	2.87467e-05	0	1	1	1	0.75	0	0	0	0	#DIV/0!	0	0	0	0	0
SLC7A6	Y+L amino acid transporter 2 [Homo sapiens]	1024	0.355918	10	0.44865	0	2.696e-05	0	0	2.696e-05	0	2	0	0	0.5	0	0	0	0	#DIV/0!	0	0	0	0	0
SRA1	steroid receptor RNA activator 1 isoform 1 [Homo sapiens]	1024	0.245166	10	0.610541	0	2.942e-05	0.00013209	0	8.0755e-05	0	1	4	0	1.25	0	0	0	0	#DIV/0!	0	0	0	0	0
SRP14	signal recognition particle 14 kDa protein [Homo sapiens]	1024	0.355918	10	0.44865	0	0.00015313	0	0	0.00015313	0	3	0	0	0.75	0	0	0	0	#DIV/0!	0	0	0	0	0
STK10	serine/threonine-protein kinase 10 [Homo sapiens]	1024	0.355918	10	0.44865	8.03e-06	0	0	0	8.03e-06	1.1129	0	0	0	0.278226	0	0	0	0	#DIV/0!	0	0	0	0	0
SWAP70	gi|530395148|ref|XP_005252886.1|:PREDICTED: switch-associated protein 70 isoform X1 [Homo sapiens] ;gi|93102364|ref|NP_055870.2|:switch-associated protein 70 [Homo sapiens] ;	1024	0.159083	10	0.798376	5.302e-05	0	2.958e-05	0	4.13e-05	4	0	2	0	1.5	0	0	0	0	#DIV/0!	0	0	0	0	0
TACO1	translational activator of cytochrome c oxidase 1 [Homo sapiens]	1024	0.137971	10	0.860211	0	0	2.624e-05	3.285e-05	2.9545e-05	0	0	1	1	0.5	0	0	0	0	#DIV/0!	0	0	0	0	0
TBC1D1	gi|359807035|ref|NP_001240841.1|:TBC1 domain family member 1 isoform 2 [Homo sapiens] ;gi|50658061|ref|NP_055988.2|:TBC1 domain family member 1 isoform 1 [Homo sapiens] ;gi|530376473|ref|XP_005262703.1|:PREDICTED: TBC1 domain family member 1 isoform X1 [Homo sapiens] ;gi|530376475|ref|XP_005262704.1|:PREDICTED: TBC1 domain family member 1 isoform X2 [Homo sapiens] ;gi|530376477|ref|XP_005262705.1…	1024	0.00299266	10	2.52394	1.205e-05	2.396e-05	1.345e-05	1.01e-05	1.489e-05	2	4	2	1.2	2.3	0	0	0	0	#DIV/0!	0	0	0	0	0
TBC1D13	gi|190014603|ref|NP_060671.3|:TBC1 domain family member 13 isoform a [Homo sapiens] ;gi|557947980|ref|NP_001273701.1|:TBC1 domain family member 13 isoform b [Homo sapiens] ;gi|578817567|ref|XP_006717210.1|:PREDICTED: TBC1 domain family member 13 isoform X2 [Homo sapiens] ;	1024	0.135036	10	0.869552	0	1.736e-05	1.948e-05	0	1.842e-05	0	1	1	0	0.5	0	0	0	0	#DIV/0!	0	0	0	0	0
TBC1D2B	gi|194018476|ref|NP_055894.6|:TBC1 domain family member 2B isoform b [Homo sapiens] ;gi|194018478|ref|NP_653173.1|:TBC1 domain family member 2B isoform a [Homo sapiens] ;gi|530405553|ref|XP_005254299.1|:PREDICTED: TBC1 domain family member 2B isoform X1 [Homo sapiens] ;	1024	0.355918	10	0.44865	0	1.519e-05	0	0	1.519e-05	0	2	0	0	0.5	0	0	0	0	#DIV/0!	0	0	0	0	0
TFB2M	dimethyladenosine transferase 2, mitochondrial [Homo sapiens]	1024	0.000320073	10	3.49475	7.056e-05	7.012e-05	3.936e-05	4.928e-05	5.733e-05	4	4	2	2	3	0	0	0	0	#DIV/0!	0	0	0	0	0
TGM3	gi|189458821|ref|NP_003236.3|:protein-glutamine gamma-glutamyltransferase E [Homo sapiens] ;gi|578835525|ref|XP_006723678.1|:PREDICTED: protein-glutamine gamma-glutamyltransferase E isoform X1 [Homo sapiens] ;	1024	0.00991098	10	2.00388	1.008e-05	2.003e-05	3.374e-05	4.224e-05	2.65225e-05	1	2	3	3	2.25	0	0	0	0	#DIV/0!	0	0	0	0	0
THTPA	thiamine-triphosphatase isoform 1 [Homo sapiens]	1024	0.355918	10	0.44865	0.00012149	0	0	0	0.00012149	4	0	0	0	1	0	0	0	0	#DIV/0!	0	0	0	0	0
TIMM17A	mitochondrial import inner membrane translocase subunit Tim17-A [Homo sapiens]	1024	0.158592	10	0.79972	0	8.119e-05	4.558e-05	0	6.3385e-05	0	2	1	0	0.75	0	0	0	0	#DIV/0!	0	0	0	0	0
TMEM209	gi|530386550|ref|XP_005250712.1|:PREDICTED: transmembrane protein 209 isoform X1 [Homo sapiens] ;gi|530386554|ref|XP_005250714.1|:PREDICTED: transmembrane protein 209 isoform X3 [Homo sapiens] ;gi|66348165|ref|NP_116231.2|:transmembrane protein 209 [Homo sapiens] ;	1024	0.0452001	10	1.34486	2.495e-05	4.959e-05	2.783e-05	0	3.41233e-05	2	4	2	0	2	0	0	0	0	#DIV/0!	0	0	0	0	0
TMEM41B	gi|259013532|ref|NP_001158502.1|:transmembrane protein 41B isoform 2 [Homo sapiens] ;gi|66392190|ref|NP_055827.1|:transmembrane protein 41B isoform 1 [Homo sapiens] ;	1024	0.0124001	10	1.90658	5.501e-05	0.00016398	6.137e-05	7.683e-05	8.92975e-05	1	3	1	1	1.5	0	0	0	0	#DIV/0!	0	0	0	0	0
TMEM97	gi|109948302|ref|NP_055388.2|:transmembrane protein 97 [Homo sapiens] ;gi|530411007|ref|XP_005258022.1|:PREDICTED: transmembrane protein 97 isoform X1 [Homo sapiens] ;	1024	0.150634	10	0.822076	0	0	8.856e-05	5.544e-05	7.2e-05	0	0	2	1	0.75	0	0	0	0	#DIV/0!	0	0	0	0	0
TRMT112	gi|554506493|ref|NP_001273011.1|:tRNA methyltransferase 112 homolog isoform 2 [Homo sapiens] ;gi|554506526|ref|NP_001273013.1|:tRNA methyltransferase 112 homolog isoform 3 [Homo sapiens] ;gi|7705477|ref|NP_057488.1|:tRNA methyltransferase 112 homolog isoform 1 [Homo sapiens] ;	1024	0.0279762	10	1.55321	0	0.0001157	0.00012989	0.00016262	0.00013607	0	2	2	2	1.5	0	0	0	0	#DIV/0!	0	0	0	0	0
TTL	gi|24308516|ref|NP_714923.1|:tubulin--tyrosine ligase [Homo sapiens] ;gi|530369054|ref|XP_005263656.1|:PREDICTED: tubulin--tyrosine ligase isoform X1 [Homo sapiens] ;	1024	0.133978	10	0.872967	1.853e-05	1.841e-05	0	0	1.847e-05	1	1	0	0	0.5	0	0	0	0	#DIV/0!	0	0	0	0	0
TXNL1	gi|4759274|ref|NP_004777.1|:thioredoxin-like protein 1 [Homo sapiens] ;gi|578832785|ref|XP_006722643.1|:PREDICTED: thioredoxin-like protein 1 isoform X1 [Homo sapiens] ;	1024	0.0822266	10	1.08499	4.834e-05	0.00016815	2.697e-05	3.376e-05	6.9305e-05	2	7	1	1	2.75	0	0	0	0	#DIV/0!	0	0	0	0	0
UBAC1	ubiquitin-associated domain-containing protein 1 [Homo sapiens]	1024	0.355918	10	0.44865	8.624e-05	0	0	0	8.624e-05	5	0	0	0	1.25	0	0	0	0	#DIV/0!	0	0	0	0	0
UBAC2	gi|221316645|ref|NP_001137544.1|:ubiquitin-associated domain-containing protein 2 isoform 1 precursor [Homo sapiens] ;gi|29366838|ref|NP_808882.1|:ubiquitin-associated domain-containing protein 2 isoform 2 [Homo sapiens] ;gi|578825253|ref|XP_006720011.1|:PREDICTED: ubiquitin-associated domain-containing protein 2 isoform X2 [Homo sapiens] ;	1024	0.355918	10	0.44865	0	8.072e-05	0	0	8.072e-05	0	4	0	0	1	0	0	0	0	#DIV/0!	0	0	0	0	0
UBE2G2	gi|29893557|ref|NP_003334.2|:ubiquitin-conjugating enzyme E2 G2 isoform 1 [Homo sapiens] ;gi|321117279|ref|NP_001189418.1|:ubiquitin-conjugating enzyme E2 G2 isoform 3 [Homo sapiens] ;gi|33359701|ref|NP_872630.1|:ubiquitin-conjugating enzyme E2 G2 isoform 2 [Homo sapiens] ;	1024	0.17876	10	0.747729	0	4.207e-05	9.447e-05	0	6.827e-05	0	1	2	0	0.75	0	0	0	0	#DIV/0!	0	0	0	0	0
UBE3C	ubiquitin-protein ligase E3C [Homo sapiens]	1024	9.57448e-05	10	4.01888	2.58e-05	4.487e-05	3.598e-05	3.604e-05	3.56725e-05	4	7	5	4	5	0	0	0	0	#DIV/0!	0	0	0	0	0
UBR1	E3 ubiquitin-protein ligase UBR1 [Homo sapiens]	1024	0.355918	10	0.44865	0	1.191e-05	0	0	1.191e-05	0	3	0	0	0.75	0	0	0	0	#DIV/0!	0	0	0	0	0
UBR2	gi|27597061|ref|NP_056070.1|:E3 ubiquitin-protein ligase UBR2 isoform 1 [Homo sapiens] ;gi|530381698|ref|XP_005249022.1|:PREDICTED: E3 ubiquitin-protein ligase UBR2 isoform X1 [Homo sapiens] ;	1024	0.168669	10	0.772964	7.96e-06	3.96e-06	0	0	5.96e-06	2	1	0	0	0.75	0	0	0	0	#DIV/0!	0	0	0	0	0
UCK2	uridine-cytidine kinase 2 [Homo sapiens]	1024	0.135045	10	0.869521	0	7.979e-05	8.958e-05	0	8.4685e-05	0	3	3	0	1.5	0	0	0	0	#DIV/0!	0	0	0	0	0
UXT	gi|24041018|ref|NP_705582.1|:protein UXT isoform 1 [Homo sapiens] ;gi|4759298|ref|NP_004173.1|:protein UXT isoform 2 [Homo sapiens] ;	1024	0.158607	10	0.799678	0	8.215e-05	4.611e-05	0	6.413e-05	0	2	1	0	0.75	0	0	0	0	#DIV/0!	0	0	0	0	0
VPS25	vacuolar protein-sorting-associated protein 25 [Homo sapiens]	1024	0.135043	10	0.869528	0	7.889e-05	8.856e-05	0	8.3725e-05	0	2	2	0	1	0	0	0	0	#DIV/0!	0	0	0	0	0
VPS29	gi|17402912|ref|NP_476528.1|:vacuolar protein sorting-associated protein 29 isoform 2 [Homo sapiens] ;gi|531990788|ref|NP_001269080.1|:vacuolar protein sorting-associated protein 29 isoform 4 [Homo sapiens] ;gi|578823888|ref|XP_006719524.1|:PREDICTED: vacuolar protein sorting-associated protein 29 isoform X3 [Homo sapiens] ;gi|578823890|ref|XP_006719525.1|:PREDICTED: vacuolar protein sorting-asso…	1024	0.000637586	10	3.19546	0.00011267	7.465e-05	8.38e-05	5.246e-05	8.0895e-05	3	2	2	1	2	0	0	0	0	#DIV/0!	0	0	0	0	0
WDR92	gi|24308444|ref|NP_612467.1|:WD repeat-containing protein 92 isoform 1 [Homo sapiens] ;gi|374429545|ref|NP_001243405.1|:WD repeat-containing protein 92 isoform 2 [Homo sapiens] ;	1024	0.355918	10	0.44865	0	5.834e-05	0	0	5.834e-05	0	3	0	0	0.75	0	0	0	0	#DIV/0!	0	0	0	0	0
WIPF2	PREDICTED: WAS/WASL-interacting protein family member 2 isoform X2 [Homo sapiens]	1024	0.191479	10	0.717879	1.588e-05	3.155e-05	0.0001417	0	6.30433e-05	1	2	8	0	2.75	0	0	0	0	#DIV/0!	0	0	0	0	0
ZNF530	gi|167830431|ref|NP_065931.3|:zinc finger protein 530 [Homo sapiens] ;gi|289666754|ref|NP_690873.2|:zinc finger protein 548 isoform 2 [Homo sapiens] ;gi|289666756|ref|NP_001166244.1|:zinc finger protein 548 isoform 1 [Homo sapiens] ;gi|530415749|ref|XP_005258592.1|:PREDICTED: zinc finger protein 548 isoform X1 [Homo sapiens] ;gi|578834409|ref|XP_006723256.1|:PREDICTED: zinc finger protein 530 iso…	1024	0.167677	10	0.775527	3.499e-05	6.954e-05	0	0	5.2265e-05	3	6	0	0	2.25	0	0	0	0	#DIV/0!	0	0	0	0	0
ZNF565	PREDICTED: zinc finger protein 565 isoform X1 [Homo sapiens]	1024	0.00177458	10	2.7509	2.8e-05	1.391e-05	3.124e-05	3.911e-05	2.8065e-05	2	1	2	2	1.75	0	0	0	0	#DIV/0!	0	0	0	0	0
ZNF79	gi|188528633|ref|NP_009066.2|:zinc finger protein 79 isoform a [Homo sapiens] ;gi|20270245|ref|NP_612474.1|:zinc finger protein GLI4 [Homo sapiens] ;gi|299782608|ref|NP_001177720.1|:zinc finger protein 317 isoform 2 [Homo sapiens] ;gi|387848956|ref|NP_001248387.1|:zinc finger protein 484 isoform c [Homo sapiens] ;gi|387848961|ref|NP_001248389.1|:zinc finger protein 484 isoform b [Homo sapiens] ;g…	1024	0.355918	10	0.44865	0	2.788e-05	0	0	2.788e-05	0	2	0	0	0.5	0	0	0	0	#DIV/0!	0	0	0	0	0
	gi|574584803|ref|NP_001276052.1|:tubulin beta-4A chain isoform 1 [Homo sapiens] ;gi|574584811|ref|NP_001276056.1|:tubulin beta-4A chain isoform 2 [Homo sapiens] ;gi|574584816|ref|NP_001276058.1|:tubulin beta-4A chain isoform 3 [Homo sapiens] ;	1024	0.0259133	10	1.58648	0	0.00027872	0.0002175	0.00024891	0.000248377	0	19.8738	13.8145	12.6282	11.5791	0	0	0	0	#DIV/0!	0	0	0	0	0
	gi|578807495|ref|XP_006713730.1|:PREDICTED: DNA-directed RNA polymerases I, II, and III subunit RPABC3 isoform X3 [Homo sapiens] ;gi|578807497|ref|XP_006713731.1|:PREDICTED: DNA-directed RNA polymerases I, II, and III subunit RPABC3 isoform X4 [Homo sapiens] ;gi|578807499|ref|XP_006713732.1|:PREDICTED: DNA-directed RNA polymerases I, II, and III subunit RPABC3 isoform X5 [Homo sapiens] ;gi|578807…	1024	0.0538898	10	1.26849	0.00011976	7.934e-05	4.453e-05	0	8.121e-05	3	2	1	0	1.5	0	0	0	0	#DIV/0!	0	0	0	0	0
	PREDICTED: mitochondrial pyruvate carrier 2 isoform X1 [Homo sapiens]	1024	0.137972	10	0.860208	0	0	0.00012273	0.00015365	0.00013819	0	0	2	2	1	0	0	0	0	#DIV/0!	0	0	0	0	0
	gi|578832950|ref|XP_006722694.1|:PREDICTED: transmembrane emp24 domain-containing protein 1 isoform X1 [Homo sapiens] ;gi|5803040|ref|NP_006849.1|:transmembrane emp24 domain-containing protein 1 precursor [Homo sapiens] ;	1024	0.159083	10	0.798375	7.392e-05	0	4.124e-05	0	5.758e-05	2	0	1	0	0.75	0	0	0	0	#DIV/0!	0	0	0	0	0
	gi|558695404|ref|NP_001273898.1|:centromere protein P isoform b [Homo sapiens] ;gi|558695414|ref|NP_001273900.1|:centromere protein P isoform c [Homo sapiens] ;gi|59709758|ref|NP_001012267.1|:centromere protein P isoform a [Homo sapiens] ;	1024	0.355918	10	0.44865	7.938e-05	0	0	0	7.938e-05	2	0	0	0	0.5	0	0	0	0	#DIV/0!	0	0	0	0	0
	gi|578840114|ref|XP_006725305.1|:PREDICTED: rab11 family-interacting protein 3 isoform X1 [Homo sapiens] ;gi|578840116|ref|XP_006725306.1|:PREDICTED: rab11 family-interacting protein 3 isoform X2 [Homo sapiens] ;gi|578840118|ref|XP_006725307.1|:PREDICTED: rab11 family-interacting protein 3 isoform X3 [Homo sapiens] ;gi|578840124|ref|XP_006725310.1|:PREDICTED: rab11 family-interacting protein 3 is…	1024	0.355918	10	0.44865	1.744e-05	0	0	0	1.744e-05	2	0	0	0	0.5	0	0	0	0	#DIV/0!	0	0	0	0	0
	PREDICTED: zinc finger protein 345 isoform X1 [Homo sapiens]	1024	0.355918	10	0.44865	7.16e-06	0	0	0	7.16e-06	0.5	0	0	0	0.125	0	0	0	0	#DIV/0!	0	0	0	0	0
	PREDICTED: dynein heavy chain 6, axonemal isoform X1 [Homo sapiens]	1024	0.355918	10	0.44865	3.36e-06	0	0	0	3.36e-06	2	0	0	0	0.5	0	0	0	0	#DIV/0!	0	0	0	0	0
DYNLT1	dynein light chain Tctex-type 1 [Homo sapiens]	60.7211	2.67061e-07	5.92413	6.57339	0.0194117	0.0184301	0.0171731	0.0162327	0.0178119	314	300	249	188	262.75	0.00014682	0.00043986	0	0	0.00029334	2	4	0	0	1.5
VBP1	prefoldin subunit 3 [Homo sapiens]	44.2854	2.93002e-05	5.46876	4.53313	0.00677297	0.00940871	0.010444	0.00876636	0.008848	191	267	264	177	224.75	8.421e-05	0.00031538	0	0	0.000199795	2	5	0	0	1.75
DYNC1LI1	cytoplasmic dynein 1 light intermediate chain 1 [Homo sapiens]	42.2982	4.0229e-05	5.40252	4.39546	0.0103715	0.00925264	0.00949791	0.0134904	0.0106531	776.484	697.079	637.385	723.124	708.518	0.00028461	0.00023094	0.00021259	0.00027929	0.000251858	17.9444	9.72	6	3	9.16611
DYNC1H1	cytoplasmic dynein 1 heavy chain 1 [Homo sapiens]	37.2879	3.25417e-05	5.22064	4.48756	0.0160239	0.0141335	0.0103129	0.0135307	0.0135003	10657	9459	6148	6443	8176.75	0.00034102	0.00036642	0.0003111	0.00042968	0.000362055	191	137	78	41	111.75
DYNC1LI2	cytoplasmic dynein 1 light intermediate chain 2 isoform 1 [Homo sapiens]	30.9479	5.09653e-09	4.95177	8.29273	0.0141634	0.0134173	0.0145353	0.0146527	0.0141922	997.516	950.921	917.615	738.876	901.232	0.00033814	0.00043643	0.00056495	0.00049481	0.000458583	20.0556	17.28	15	5	14.3339
PFDN5	prefoldin subunit 5 isoform alpha [Homo sapiens]	28.1079	7.1622e-06	4.8129	5.14495	0.00580632	0.00595029	0.00668007	0.0077295	0.00654155	128	132	132	122	128.5	0.00021546	0.00024207	0.00024066	0	0.00023273	4	3	2	0	2.25
RBFOX2	gi|133925803|ref|NP_001076047.1|:RNA binding protein fox-1 homolog 2 isoform 5 [Homo sapiens] ;gi|133925805|ref|NP_001076048.1|:RNA binding protein fox-1 homolog 2 isoform 6 [Homo sapiens] ;gi|530419722|ref|XP_005261487.1|:PREDICTED: RNA binding protein fox-1 homolog 2 isoform X3 [Homo sapiens] ;gi|530419724|ref|XP_005261488.1|:PREDICTED: RNA binding protein fox-1 homolog 2 isoform X4 [Homo sapie…	16.687	0.0320092	4.06065	1.49472	0.00015489	0.00018471	0.00012096	0	0.00015352	10	12	7	0	7.25	9.2e-06	0	0	0	9.2e-06	0.5	0	0	0	0.125
HOOK3	protein Hook homolog 3 [Homo sapiens]	14.6503	8.26892e-06	3.87286	5.08255	0.00030161	0.00041069	0.00040612	0.00039408	0.000378125	31	42.4773	37.4157	29	34.9733	0	0	2.581e-05	0	2.581e-05	0	0	1	0	0.25
CCT8	T-complex protein 1 subunit theta isoform 1 [Homo sapiens]	14.2029	9.21972e-05	3.82811	4.03528	0.0325066	0.0430835	0.0367343	0.0514374	0.0409405	2550	3401	2583	2889	2855.75	0.00270955	0.00231289	0.00375343	0.00275434	0.00288255	179	102	111	31	105.75
ACTR10	actin-related protein 10 [Homo sapiens]	12.941	0.000572099	3.69388	3.24253	0.0003518	0.00063261	0.00065412	0.00042116	0.000514922	21	38	35	18	28	3.979e-05	0	0	0	3.979e-05	2	0	0	0	0.5
KBTBD2	PREDICTED: kelch repeat and BTB domain-containing protein 2 isoform X1 [Homo sapiens]	12.1289	0.000407621	3.60037	3.38974	0.00010092	0.00020057	0.00018764	0.00015661	0.000161435	9	18	15	10	13	1.331e-05	0	0	0	1.331e-05	1	0	0	0	0.25
YWHAQ	14-3-3 protein theta [Homo sapiens]	11.9055	0.00432037	3.57356	2.36448	0.00011405	0.0002136	0.00015905	0.00031859	0.000201322	4	7.53846	5	8	6.13462	0	1.691e-05	0	0	1.691e-05	0	0.333333	0	0	0.0833333
ACTR1A	alpha-centractin [Homo sapiens]	11.6465	0.000353131	3.54182	3.45206	0.00164889	0.00093504	0.00114797	0.001143	0.00121872	88.75	50.6444	55.3846	44.0476	59.7067	0.00019855	6.61e-05	4.928e-05	0	0.000104643	9	2	1	0	3
CCT7	T-complex protein 1 subunit eta isoform a [Homo sapiens]	9.50556	5.66631e-05	3.24877	4.2467	0.00159527	0.00145744	0.00130608	0.00106014	0.00135473	124	114	91	59	97	0.00018332	0.00022884	6.825e-05	8.967e-05	0.00014252	12	10	2	1	6.25
CCT5	T-complex protein 1 subunit epsilon [Homo sapiens]	9.21449	6.17916e-05	3.2039	4.20907	0.0175224	0.0181185	0.0118414	0.0169168	0.0160998	1357	1412	822	938	1132.25	0.00219262	0.00188344	0.00147285	0.00143999	0.00174723	143	82	43	16	71
PFDN6	prefoldin subunit 6 [Homo sapiens]	8.2841	0.00014003	3.05034	3.85378	0.00503623	0.00425131	0.00404774	0.00317667	0.00412799	93	79	67	42	70.25	0.00012861	0.00048163	0.00100553	0.00037744	0.000498303	2	5	7	1	3.75
RAB5C	gi|354721184|ref|NP_001238968.1|:ras-related protein Rab-5C isoform b [Homo sapiens] ;gi|41393614|ref|NP_958842.1|:ras-related protein Rab-5C isoform a [Homo sapiens] ;	8.25731	0.0571759	3.04567	1.24279	0	0.00010037	0.00021909	0.00019592	0.000171793	0	3.6	7	5	3.9	1.666e-05	2.495e-05	0	0	2.0805e-05	0.5	0.5	0	0	0.25
CCT6A	T-complex protein 1 subunit zeta isoform a [Homo sapiens]	7.72818	0.000590963	2.95013	3.22844	0.0233371	0.0164453	0.0123561	0.0171061	0.0173112	1773.9	1257.92	841.879	930.965	1201.17	0.00321809	0.00191891	0.00198914	0.00183389	0.00224001	206	82	57	20	91.25
HDAC6	gi|530421366|ref|XP_005272621.1|:PREDICTED: histone deacetylase 6 isoform X1 [Homo sapiens] ;gi|578838004|ref|XP_006724588.1|:PREDICTED: histone deacetylase 6 isoform X9 [Homo sapiens] ;	7.57751	0.422526	2.92172	0.374147	4.986e-05	0	0	0	4.986e-05	9	0	0	0	2.25	6.58e-06	0	0	0	6.58e-06	1	0	0	0	0.25
CENPE	centromere-associated protein E isoform 1 [Homo sapiens]	7.20207	0.000146994	2.84841	3.8327	0.0001138	0.00010024	0.00010387	7.225e-05	9.754e-05	44	39	36	20	34.75	2.457e-05	9.2e-06	6.86e-06	0	1.35433e-05	8	2	1	0	2.75
BICD2	protein bicaudal D homolog 2 isoform 1 [Homo sapiens]	7.07915	6.33732e-06	2.82358	5.19809	0.00754076	0.00814736	0.00776171	0.0095962	0.00826151	922.931	1003.45	851.521	840.917	904.706	0.00126125	0.00136614	0.00130038	0.00074031	0.00116702	130	94	60	13	74.25
DCTN2	gi|387527972|ref|NP_001248341.1|:dynactin subunit 2 isoform 2 [Homo sapiens] ;gi|387527974|ref|NP_001248342.1|:dynactin subunit 2 isoform 3 [Homo sapiens] ;gi|5453629|ref|NP_006391.1|:dynactin subunit 2 isoform 1 [Homo sapiens] ;	7.01683	0.0056812	2.81082	2.24556	0.00258281	0.00144697	0.00117965	0.00125896	0.0016171	149	84	61	52	86.5	0.00030875	0.00030834	0.00018393	0.00012082	0.00023046	15	10	4	1	7.5
MAPK8IP3	gi|530407777|ref|XP_005255245.1|:PREDICTED: C-Jun-amino-terminal kinase-interacting protein 3 isoform X2 [Homo sapiens] ;gi|530407781|ref|XP_005255247.1|:PREDICTED: C-Jun-amino-terminal kinase-interacting protein 3 isoform X4 [Homo sapiens] ;gi|94557295|ref|NP_001035529.1|:C-Jun-amino-terminal kinase-interacting protein 3 isoform 2 [Homo sapiens] ;	6.95987	0.142395	2.79906	0.846505	1.064e-05	8.2e-05	3.744e-05	0	4.336e-05	2.02632	15.7229	6.39344	0	6.03566	6.23e-06	0	0	0	6.23e-06	1	0	0	0	0.25
PPID	peptidyl-prolyl cis-trans isomerase D [Homo sapiens]	6.92228	5.82003e-05	2.79125	4.23507	0.00030209	0.00024391	0.00037914	0.00031644	0.000310395	16	13	18	12	14.75	4.484e-05	0	0	0	4.484e-05	2	0	0	0	0.5
UNC45A	protein unc-45 homolog A isoform 2 [Homo sapiens]	6.82338	0.00143628	2.77049	2.84276	0.0001702	0.0002868	0.00015686	0.00016537	0.000194807	23	39	19	16	24.25	4.394e-05	1.316e-05	0	0	2.855e-05	5	1	0	0	1.5
PFDN2	prefoldin subunit 2 [Homo sapiens]	6.19006	2.26997e-06	2.62995	5.64398	0.00172375	0.00211867	0.00207487	0.00202741	0.00198618	38	47	41	32	39.5	0.00032319	0.00040344	0.00024066	0.00031617	0.000320865	6	5	2	1	3.5
KRT6B	keratin, type II cytoskeletal 6B [Homo sapiens]	6.15794	0.185382	2.62245	0.731933	0	0.0001919	1.244e-05	0.00024014	0.00014816	0	15.5906	0.9	13.8812	7.59293	3.68e-06	2.534e-05	0	4.316e-05	2.406e-05	0.25	1.15	0	0.5	0.475
CCT2	T-complex protein 1 subunit beta isoform 1 [Homo sapiens]	5.60895	0.000109057	2.48773	3.96234	0.00238951	0.00182958	0.00160239	0.0018602	0.00192042	183	141	110	102	134	0.00049616	0.00023226	0.00027709	0.00036403	0.000342385	32	10	8	4	13.5
HIST2H3D	histone H3.2 [Homo sapiens]	5.51624	0.0443003	2.46369	1.35359	0	0.00142924	0.00148992	0.0008609	0.00126002	0	28	26	12	16.5	0	0.00022842	0	0	0.00022842	0	2.5	0	0	0.625
LONP1	gi|21396489|ref|NP_004784.2|:lon protease homolog, mitochondrial isoform 1 precursor [Homo sapiens] ;gi|451327634|ref|NP_001263408.1|:lon protease homolog, mitochondrial isoform 2 [Homo sapiens] ;gi|451327636|ref|NP_001263409.1|:lon protease homolog, mitochondrial isoform 3 [Homo sapiens] ;	5.47399	0.45206	2.45259	0.344804	9.47e-05	0	0	0	9.47e-05	13	0	0	0	3.25	1.73e-05	0	0	0	1.73e-05	2	0	0	0	0.5
ARAF	gi|371875793|ref|NP_001243125.1|:serine/threonine-protein kinase A-Raf isoform 2 [Homo sapiens] ;gi|4502193|ref|NP_001645.1|:serine/threonine-protein kinase A-Raf isoform 1 [Homo sapiens] ;gi|578838017|ref|XP_006724592.1|:PREDICTED: serine/threonine-protein kinase A-Raf isoform X1 [Homo sapiens] ;	5.46017	0.000796221	2.44895	3.09897	0.00010324	0.00013411	0.00015055	0.00020704	0.000148735	9	11.7647	11.7647	12.9231	11.3631	2.724e-05	0	0	0	2.724e-05	2	0	0	0	0.5
AKTIP	gi|530424214|ref|XP_005256155.1|:PREDICTED: AKT-interacting protein isoform X5 [Homo sapiens] ;gi|61743933|ref|NP_001012398.1|:AKT-interacting protein [Homo sapiens] ;	5.27225	0.000811921	2.39842	3.09049	0.00081063	0.00061601	0.00058517	0.0004662	0.000619502	34	26	22	14	24	0.00019818	4.241e-05	6.324e-05	0.00016618	0.000117502	7	1	1	1	2.5
IMPA2	inositol monophosphatase 2 [Homo sapiens]	5.04809	0.303441	2.33574	0.517926	0.00024256	4.821e-05	0	0	0.000145385	10	2	0	0	3	2.88e-05	0	0	0	2.88e-05	1	0	0	0	0.25
AIP	AH receptor-interacting protein [Homo sapiens]	4.87524	0.00378098	2.28547	2.4224	0.0002752	0.00065213	0.00047233	0.00041393	0.000453398	13	31	20	14	19.5	0	7.531e-05	5.615e-05	0.00014754	9.3e-05	0	2	1	1	1
DYNC2H1	gi|122937398|ref|NP_001073932.1|:cytoplasmic dynein 2 heavy chain 1 isoform 2 [Homo sapiens] ;gi|283806679|ref|NP_001368.2|:cytoplasmic dynein 2 heavy chain 1 isoform 1 [Homo sapiens] ;gi|578822370|ref|XP_006718966.1|:PREDICTED: cytoplasmic dynein 2 heavy chain 1 isoform X1 [Homo sapiens] ;	4.5798	0.482149	2.19528	0.316818	3.886e-05	0	3.61e-06	0	2.1235e-05	24	0	2	0	6.5	3.85e-06	5.76e-06	4.3e-06	0	4.63667e-06	2	2	1	0	1.25
TUBA1C	tubulin alpha-1C chain [Homo sapiens]	4.56639	0.000162286	2.19105	3.78972	0.00338999	0.00393632	0.00461481	0.00457601	0.00412928	217.888	254.596	265.872	210.582	237.234	0.00141593	0.00077837	0.00051853	0	0.000904277	76.6413	28.1252	12.5641	0	29.3327
STXBP2	gi|188528689|ref|NP_008880.2|:syntaxin-binding protein 2 isoform a [Homo sapiens] ;gi|188528901|ref|NP_001120868.1|:syntaxin-binding protein 2 isoform b [Homo sapiens] ;gi|439253035|ref|NP_001258963.1|:syntaxin-binding protein 2 isoform c [Homo sapiens] ;	4.45264	0.00782675	2.15466	2.10642	9.424e-05	2.341e-05	6.571e-05	6.581e-05	6.22925e-05	8	2	5	4	4.75	1.399e-05	0	0	0	1.399e-05	1	0	0	0	0.25
APRT	adenine phosphoribosyltransferase isoform a [Homo sapiens]	4.03389	0.0416561	2.01217	1.38032	0.0003881	0.00042423	0.00030308	0	0.000371803	10	11	7	0	7	9.217e-05	0	0	0	9.217e-05	2	0	0	0	0.5
PFDN4	prefoldin subunit 4 [Homo sapiens]	4.00407	0.00169622	2.00147	2.77052	0.00093838	0.00108793	0.00162848	0.00080094	0.00111393	18	21	28	11	19.5	0	0.0002782	0	0	0.0002782	0	3	0	0	0.75
TIMM44	mitochondrial import inner membrane translocase subunit TIM44 [Homo sapiens]	3.89843	0.0042442	1.96289	2.3722	7.728e-05	0.00019966	0.00017242	0.00019427	0.000160907	5	13	10	9	9.25	5.506e-05	2.749e-05	0	0	4.1275e-05	3	1	0	0	1
CCDC109B	gi|194018570|ref|NP_060388.2|:mitochondrial calcium uniporter regulatory subunit MCUb [Homo sapiens] ;gi|578809200|ref|XP_006714309.1|:PREDICTED: mitochondrial calcium uniporter regulatory subunit MCUb isoform X1 [Homo sapiens] ;	3.86837	0.275303	1.95172	0.56019	0	0.00014463	4.639e-05	0	9.551e-05	0	7	2	0	2.25	2.469e-05	0	0	0	2.469e-05	1	0	0	0	0.25
DNAJA2	dnaJ homolog subfamily A member 2 [Homo sapiens]	3.86802	0.000958377	1.95159	3.01846	0.00110212	0.00104467	0.00073773	0.00073414	0.000904665	65	62	39	31	49.25	0.00028187	0.0003016	0	0.00011818	0.000233883	14	10	0	1	6.25
DNAJA1	dnaJ homolog subfamily A member 1 [Homo sapiens]	3.84944	0.000225845	1.94465	3.64619	0.00105578	0.00120655	0.00082449	0.00105679	0.0010359	60	69	42	43	53.5	0.0003761	0.0003443	0.00023338	0.00012264	0.000269105	18	11	5	1	8.75
DCTN1	gi|13259510|ref|NP_004073.2|:dynactin subunit 1 isoform 1 [Homo sapiens] ;gi|205277392|ref|NP_001128512.1|:dynactin subunit 1 isoform 3 [Homo sapiens] ;gi|299890871|ref|NP_001177765.1|:dynactin subunit 1 isoform 5 [Homo sapiens] ;gi|299890875|ref|NP_001177766.1|:dynactin subunit 1 isoform 6 [Homo sapiens] ;	3.72987	5.99682e-06	1.89913	5.22208	0.00120802	0.00144489	0.00125012	0.00125206	0.00128877	221	266	205	164	214	0.00024016	0.00036948	0.00039149	0.00038098	0.000345527	37	38	27	10	28
PSMD14	26S proteasome non-ATPase regulatory subunit 14 [Homo sapiens]	3.62428	0.00483065	1.85769	2.31599	0.00087885	0.00167952	0.00145812	0.00100716	0.00125591	39	75	58	32	51	0.00053517	0.00020042	0.00017933	0.00047119	0.000346527	20	5	3	3	7.75
CHD3	gi|158420731|ref|NP_001005271.2|:chromodomain-helicase-DNA-binding protein 3 isoform 3 [Homo sapiens] ;gi|530409847|ref|XP_005256484.1|:PREDICTED: chromodomain-helicase-DNA-binding protein 3 isoform X1 [Homo sapiens] ;gi|530409851|ref|XP_005256486.1|:PREDICTED: chromodomain-helicase-DNA-binding protein 3 isoform X3 [Homo sapiens] ;gi|578829645|ref|XP_006721486.1|:PREDICTED: chromodomain-helicase-…	3.56774	0.514223	1.83501	0.288848	0	0	0	1.659e-05	1.659e-05	0	0	0	3.5	0.875	4.65e-06	0	0	0	4.65e-06	1.15385	0	0	0	0.288462
	PREDICTED: CTP synthase 2 isoform X2 [Homo sapiens]	3.54571	0.00201295	1.82607	2.69617	6.266e-05	4.865e-05	4.193e-05	8.645e-05	5.99225e-05	5.25641	4.10667	3.15254	5.19231	4.42698	1.69e-05	0	0	0	1.69e-05	1.19355	0	0	0	0.298387
CCDC111	gi|530377326|ref|XP_005262873.1|:PREDICTED: coiled-coil domain-containing protein 111 isoform X7 [Homo sapiens] ;gi|530377330|ref|XP_005262875.1|:PREDICTED: coiled-coil domain-containing protein 111 isoform X9 [Homo sapiens] ;gi|578808883|ref|XP_005262867.2|:PREDICTED: coiled-coil domain-containing protein 111 isoform X1 [Homo sapiens] ;gi|578808885|ref|XP_005262868.2|:PREDICTED: coiled-coil doma…	3.48789	0.190355	1.80236	0.720437	1.814e-05	0.00016228	0.00010121	0	9.38767e-05	1	9	5	0	3.75	2.155e-05	3.228e-05	0	0	2.6915e-05	1	1	0	0	0.5
	PREDICTED: cathepsin B isoform X2 [Homo sapiens]	3.46445	0.013572	1.79262	1.86736	4.121e-05	0.00010239	0.00013794	5.756e-05	8.4775e-05	2	5	6	2	3.75	2.447e-05	0	0	0	2.447e-05	1	0	0	0	0.25
NUP155	gi|24430149|ref|NP_705618.1|:nuclear pore complex protein Nup155 isoform 1 [Homo sapiens] ;gi|4758844|ref|NP_004289.1|:nuclear pore complex protein Nup155 isoform 2 [Homo sapiens] ;gi|509155837|ref|NP_001265241.1|:nuclear pore complex protein Nup155 isoform 3 [Homo sapiens] ;	3.43857	0.908356	1.78181	0.0417438	9.04e-05	0	0	0	9.04e-05	18	0	0	0	4.5	2.982e-05	3.573e-05	1.332e-05	0	2.629e-05	5	4	1	0	2.5
ATE1	gi|50345875|ref|NP_008972.2|:arginyl-tRNA--protein transferase 1 isoform 2 [Homo sapiens] ;gi|530392913|ref|XP_005269513.1|:PREDICTED: arginyl-tRNA--protein transferase 1 isoform X1 [Homo sapiens] ;gi|530392917|ref|XP_005269515.1|:PREDICTED: arginyl-tRNA--protein transferase 1 isoform X3 [Homo sapiens] ;gi|530392919|ref|XP_005269516.1|:PREDICTED: arginyl-tRNA--protein transferase 1 isoform X4 [Ho…	3.39534	0.0139373	1.76355	1.85582	0.00024275	0.00014742	0.00024072	7.534e-05	0.000176558	18	11	16	4	12.25	3.203e-05	7.197e-05	0	0	5.2e-05	2	3	0	0	1.25
PARVA	gi|315583337|ref|NP_060692.2|:alpha-parvin [Homo sapiens] ;gi|530395553|ref|XP_005253072.1|:PREDICTED: alpha-parvin isoform X1 [Homo sapiens] ;	3.38765	0.121006	1.76028	0.917193	0	6.74e-05	0.0001135	2.368e-05	6.81933e-05	0	4	6	1	2.75	2.013e-05	0	0	0	2.013e-05	1	0	0	0	0.25
HOOK1	PREDICTED: protein Hook homolog 1 isoform X1 [Homo sapiens]	3.3736	0.000474313	1.75429	3.32394	0.00149694	0.00129231	0.0015264	0.00151447	0.00145753	156	135.523	142.584	113	136.777	0.00037602	0.00069982	0.00058544	6.688e-05	0.00043204	33	41	23	1	24.5
STUB1	E3 ubiquitin-protein ligase CHIP [Homo sapiens]	3.36387	0.00281678	1.75012	2.55025	0.00092221	0.00087062	0.00105455	0.00061182	0.0008648	40	38	41	19	34.5	0.00013688	0.00028707	0.00012231	0.00048208	0.000257085	5	7	2	3	4.25
RUVBL1	ruvB-like 1 [Homo sapiens]	3.30376	2.77639e-05	1.72411	4.55652	0.0119493	0.0130924	0.010921	0.0130948	0.0122644	780	860	639	612	722.75	0.00531182	0.00343353	0.00300714	0.00309649	0.00371225	292	126	74	29	130.25
DYNLL1	dynein light chain 1, cytoplasmic [Homo sapiens]	3.3006	0.00114269	1.72273	2.94207	0.00514569	0.00618801	0.00678999	0.00813242	0.00656403	65.5574	79.3333	77.541	74.1818	74.1534	0.00149127	0.00167543	0.00342055	0.00136769	0.00198874	16	12	16.4286	2.5	11.7321
FAM160A1	PREDICTED: protein FAM160A1 isoform X1 [Homo sapiens]	3.24278	0.00048805	1.69723	3.31154	0.0005508	0.0005607	0.00074937	0.00058166	0.000610633	82	84	100	62	82	0.00014357	0.00011948	0.0003029	0.00018727	0.000188305	18	10	17	4	12.25
ERC1	gi|38045896|ref|NP_829883.1|:ELKS/Rab6-interacting/CAST family member 1 isoform delta [Homo sapiens] ;gi|38045898|ref|NP_829884.1|:ELKS/Rab6-interacting/CAST family member 1 isoform epsilon [Homo sapiens] ;	3.23083	0.0450786	1.6919	1.34603	1.926e-05	4.466e-05	5.014e-05	8.97e-06	3.07575e-05	3	7	7	1	4.5	7.62e-06	1.142e-05	0	0	9.52e-06	1	1	0	0	0.5
LPGAT1	PREDICTED: acyl-CoA:lysophosphatidylglycerol acyltransferase 1 isoform X1 [Homo sapiens]	3.20943	0.0748729	1.68232	1.12568	3.467e-05	8.613e-05	7.735e-05	0	6.605e-05	2	5	4	0	2.75	2.058e-05	0	0	0	2.058e-05	1	0	0	0	0.25
HSP90AB1	gi|431822408|ref|NP_001258901.1|:heat shock protein HSP 90-beta isoform c [Homo sapiens] ;gi|530381931|ref|XP_005249132.1|:PREDICTED: heat shock protein HSP 90-beta isoform X1 [Homo sapiens] ;	3.15619	0.000264222	1.65818	3.57803	0.00319213	0.00445473	0.00414311	0.00337751	0.00379187	326.262	458.178	379.575	247.162	352.794	0.00087222	0.0016208	0.00117193	0.00114068	0.00120141	75.0753	93.1307	45.1558	16.7273	57.5223
KRT9	keratin, type I cytoskeletal 9 [Homo sapiens]	3.11773	0.00039807	1.6405	3.40004	0.00192865	0.00255172	0.00175133	0.00176971	0.00200035	172	229	140	113	163.5	0.00063911	0.00055848	0.0007436	0.00062523	0.000641605	48	28	25	8	27.25
KRT6A	keratin, type II cytoskeletal 6A [Homo sapiens]	3.11735	0.422753	1.64032	0.373913	0	0.00063718	1.244e-05	0.00073535	0.000461657	0	51.767	0.9	42.5069	23.7935	3.68e-06	2.534e-05	0.00050292	6.043e-05	0.000148093	0.25	1.15	15.307	0.7	4.35175
PSMG1	gi|387849314|ref|NP_001248753.1|:proteasome assembly chaperone 1 isoform 3 [Homo sapiens] ;gi|44680114|ref|NP_982257.1|:proteasome assembly chaperone 1 isoform b [Homo sapiens] ;gi|4505023|ref|NP_003711.1|:proteasome assembly chaperone 1 isoform a [Homo sapiens] ;	3.08325	0.214575	1.62445	0.66842	0	9.812e-05	8.262e-05	0	9.037e-05	0	4	3	0	1.75	2.931e-05	0	0	0	2.931e-05	1	0	0	0	0.25
RUVBL2	ruvB-like 2 [Homo sapiens]	3.07136	0.00101778	1.61888	2.99235	0.0140318	0.0183371	0.016277	0.0229066	0.0178881	930	1223	967	1087	1051.75	0.00777561	0.00509926	0.00432244	0.00609935	0.00582417	434	190	108	58	197.5
ALDH7A1	gi|188035924|ref|NP_001173.2|:alpha-aminoadipic semialdehyde dehydrogenase isoform 1 precursor [Homo sapiens] ;gi|319655561|ref|NP_001188306.1|:alpha-aminoadipic semialdehyde dehydrogenase isoform 2 [Homo sapiens] ;	3.02047	0.00753203	1.59477	2.12309	5.184e-05	0.00010304	0.00014459	7.241e-05	9.297e-05	4	8	10	4	6.5	3.078e-05	0	0	0	3.078e-05	2	0	0	0	0.5
SRM	spermidine synthase [Homo sapiens]	2.9466	0.00768871	1.55905	2.11415	0.00039324	0.00059766	0.00038709	0.00029077	0.00041719	17	26	15	9	16.75	0.00021974	8.229e-05	0.00012272	0	0.000141583	8	2	2	0	3
CLN3	gi|109698601|ref|NP_001035897.1|:battenin isoform a [Homo sapiens] ;gi|554790416|ref|NP_001273039.1|:battenin isoform e [Homo sapiens] ;	2.94456	0.360569	1.55805	0.443011	9.569e-05	1.585e-05	0	0	5.577e-05	6	1	0	0	1.75	1.894e-05	0	0	0	1.894e-05	1	0	0	0	0.25
KRT5	keratin, type II cytoskeletal 5 [Homo sapiens]	2.93471	0.00381464	1.55322	2.41855	0.00046742	0.00077958	0.00075855	0.00063964	0.000661297	39.4775	66.2568	57.4263	38.6792	50.4599	0.00011379	0.00017849	0.00038373	0	0.000225337	8.09346	8.47507	12.2177	0	7.19657
SDF2L1	stromal cell-derived factor 2-like protein 1 precursor [Homo sapiens]	2.9274	0.200743	1.54962	0.697359	0.00025288	0	7.053e-05	8.83e-05	0.000137237	8	0	2	2	3	3.753e-05	5.623e-05	0	0	4.688e-05	1	1	0	0	0.5
CCDC88C	protein Daple [Homo sapiens]	2.90762	0.00530821	1.53984	2.27505	4.822e-05	8.558e-05	7.686e-05	6.254e-05	6.83e-05	14	25	20	13	18	4.09e-06	4.289e-05	0	0	2.349e-05	1	7	0	0	2
FKBP4	peptidyl-prolyl cis-trans isomerase FKBP4 [Homo sapiens]	2.89616	0.00177159	1.53414	2.75164	0.00036527	0.00058984	0.00057729	0.00046765	0.000500013	24	39	34	22	29.75	0.00018072	0.00013536	0.00020186	0	0.000172647	10	5	5	0	5
	PREDICTED: voltage-dependent anion-selective channel protein 2 isoform X1 [Homo sapiens]	2.89347	0.00656958	1.5328	2.18246	0.00102172	0.00056669	0.00082175	0.00056418	0.000743585	43	24	31	17	28.75	0.00033858	0.00016906	0.00018909	0.00033122	0.000256988	12	4	3	2	5.25
ANXA2	gi|209862831|ref|NP_001129487.1|:annexin A2 isoform 2 [Homo sapiens] ;gi|50845388|ref|NP_001002858.1|:annexin A2 isoform 1 [Homo sapiens] ;	2.87595	0.0247814	1.52404	1.60587	0.00024728	8.191e-05	0.00011495	0.00025903	0.000175792	12	4	5	9	7.5	4.894e-05	7.331e-05	0	0	6.1125e-05	2	2	0	0	1
MRPL4	gi|22547138|ref|NP_666499.1|:39S ribosomal protein L4, mitochondrial isoform a [Homo sapiens] ;gi|22547140|ref|NP_666500.1|:39S ribosomal protein L4, mitochondrial isoform b [Homo sapiens] ;	2.87064	0.202196	1.52137	0.694228	0.00015724	2.232e-05	5.012e-05	0	7.656e-05	7	1	2	0	2.5	2.667e-05	0	0	0	2.667e-05	1	0	0	0	0.25
ADAM9	disintegrin and metalloproteinase domain-containing protein 9 precursor [Homo sapiens]	2.84773	0.232065	1.50981	0.634391	0	6.781e-05	4.758e-05	0	5.7695e-05	0	8	5	0	3.25	2.026e-05	0	0	0	2.026e-05	2	0	0	0	0.5
HOMER1	homer protein homolog 1 isoform 1 [Homo sapiens]	2.81904	0.565389	1.4952	0.247653	0	0	6.605e-05	0	6.605e-05	0	0	3	0	0.75	2.343e-05	0	0	0	2.343e-05	1	0	0	0	0.25
DCAF7	DDB1- and CUL4-associated factor 7 [Homo sapiens]	2.81689	0.121902	1.4941	0.913989	2.043e-05	8.119e-05	0.00025067	5.706e-05	0.000102338	1	4	11	2	4.5	0	3.633e-05	0	0	3.633e-05	0	1	0	0	0.25
	PREDICTED: acetyl-CoA carboxylase 2 isoform X6 [Homo sapiens]	2.81431	0.565808	1.49278	0.247331	0.00057215	0	0	0	0.00057215	196.156	0	0	0	49.0391	0	0	0	0.0002033	0.0002033	0	0	0	10	2.5
AP1B1	gi|260436860|ref|NP_663782.2|:AP-1 complex subunit beta-1 isoform b [Homo sapiens] ;gi|260436862|ref|NP_001118.3|:AP-1 complex subunit beta-1 isoform a [Homo sapiens] ;gi|260436864|ref|NP_001159491.1|:AP-1 complex subunit beta-1 isoform c [Homo sapiens] ;	2.76336	0.00958956	1.46642	2.0182	0.00020136	0.0001666	0.00013872	8.479e-05	0.000147867	27.0667	22.5349	16.7143	8.16	18.619	8.834e-05	1.868e-05	0	0	5.351e-05	10	1.41176	0	0	2.85294
KIAA1279	KIF1-binding protein [Homo sapiens]	2.72933	0.000733435	1.44855	3.13464	0.00050621	0.00067073	0.00045179	0.00050277	0.000532875	45	60	36	32	43.25	0.00014694	0.00016008	0.00023872	0.00023522	0.00019524	11	8	8	3	7.5
ARL1	ADP-ribosylation factor-like protein 1 [Homo sapiens]	2.67089	0.00144255	1.41732	2.84087	0.00100348	0.00072872	0.00086115	0.00070077	0.00082353	26	19	20	13	19.5	0	0.00041191	0.00020476	0	0.000308335	0	6	2	0	2
DDX28	probable ATP-dependent RNA helicase DDX28 [Homo sapiens]	2.66504	0.230546	1.41416	0.637243	0	3.857e-05	4.33e-05	0	4.0935e-05	0	3	3	0	1.5	1.536e-05	0	0	0	1.536e-05	1	0	0	0	0.25
NMD3	PREDICTED: 60S ribosomal export protein NMD3 isoform X2 [Homo sapiens]	2.65195	0.00561962	1.40705	2.25029	0.00022221	0.00019322	0.00034087	0.00023277	0.000247268	16	14	22	12	16	0.00013193	7.411e-05	7.368e-05	0	9.324e-05	8	3	2	0	3.25
CAMK2G	gi|26667199|ref|NP_751910.1|:calcium/calmodulin-dependent protein kinase type II subunit gamma isoform 3 [Homo sapiens] ;gi|26667203|ref|NP_751911.1|:calcium/calmodulin-dependent protein kinase type II subunit gamma isoform 1 [Homo sapiens] ;gi|325197141|ref|NP_001191421.1|:calcium/calmodulin-dependent protein kinase type II subunit gamma isoform 7 [Homo sapiens] ;gi|530394438|ref|XP_005270252.1|…	2.62656	0.0671204	1.39318	1.17315	2.697e-05	6.701e-05	2.257e-05	9.42e-06	3.14925e-05	2	5	1.5	0.5	2.25	0	1.199e-05	0	0	1.199e-05	0	0.5	0	0	0.125
TOP2B	DNA topoisomerase 2-beta [Homo sapiens]	2.57961	0.0181258	1.36715	1.7417	0.00015945	0.00014505	0.00029709	0.00020992	0.000202877	37	33.871	61.7931	34.875	41.8848	4.606e-05	5.27e-05	0.00013718	0	7.86467e-05	9	6.875	12	0	6.96875
ADRM1	PREDICTED: proteasomal ubiquitin receptor ADRM1 isoform X1 [Homo sapiens]	2.57678	0.0990624	1.36557	1.00409	0.00010298	0.00013645	0.00011489	0	0.000118107	6	8	6	0	5	6.114e-05	3.053e-05	0	0	4.5835e-05	3	1	0	0	1
GMPPA	gi|530370208|ref|XP_005246542.1|:PREDICTED: mannose-1-phosphate guanyltransferase alpha isoform X3 [Homo sapiens] ;gi|530370210|ref|XP_005246543.1|:PREDICTED: mannose-1-phosphate guanyltransferase alpha isoform X4 [Homo sapiens] ;	2.56038	0.00379646	1.35636	2.42062	6.575e-05	0.00011434	0.00011002	9.183e-05	9.5485e-05	4	7	6	4	5.25	3.904e-05	2.924e-05	4.36e-05	0	3.72933e-05	2	1	1	0	1
CFL2	gi|33946278|ref|NP_619579.1|:cofilin-2 isoform 1 [Homo sapiens] ;gi|343887344|ref|NP_001230574.1|:cofilin-2 isoform 2 [Homo sapiens] ;	2.54321	0.351993	1.34665	0.453466	0	8.262e-05	0.00036056	0	0.00022159	0	1.97561	7.68	0	2.4139	8.713e-05	0	0	0	8.713e-05	1.74359	0	0	0	0.435897
UBE2M	NEDD8-conjugating enzyme Ubc12 [Homo sapiens]	2.53847	0.0811864	1.34396	1.09052	0.00041991	0.00106217	0.00102209	0.00181276	0.00107923	11	28	24	34	24.25	0.00018132	0.00074692	0.0005063	0.00026606	0.00042515	4	11	5	1	5.25
TP53RK	TP53-regulating kinase [Homo sapiens]	2.53319	0.0696624	1.34096	1.157	0.00011045	0	6.161e-05	7.713e-05	8.30633e-05	4	0	2	2	2	3.279e-05	0	0	0	3.279e-05	1	0	0	0	0.25
MAP2K4	gi|4506889|ref|NP_003001.1|:dual specificity mitogen-activated protein kinase kinase 4 isoform 1 [Homo sapiens] ;gi|526479851|ref|NP_001268364.1|:dual specificity mitogen-activated protein kinase kinase 4 isoform 2 [Homo sapiens] ;gi|530410555|ref|XP_005256812.1|:PREDICTED: dual specificity mitogen-activated protein kinase kinase 4 isoform X3 [Homo sapiens] ;gi|578830014|ref|XP_006721631.1|:PREDI…	2.52621	0.594638	1.33698	0.225747	5.252e-05	0	0	0	5.252e-05	3	0	0	0	0.75	2.079e-05	0	0	0	2.079e-05	1	0	0	0	0.25
NUDCD3	nudC domain-containing protein 3 [Homo sapiens]	2.52445	0.00613861	1.33597	2.21193	0.00017416	0.0001923	0.00028065	0.00016216	0.000202317	9	10	13	6	9.5	6.893e-05	6.884e-05	0.00010266	0	8.01433e-05	3	2	2	0	1.75
GALK1	galactokinase [Homo sapiens]	2.52127	0.0701505	1.33415	1.15397	0	0.00010626	0.00013917	7.467e-05	0.0001067	0	6	7	3	4	4.232e-05	0	0	0	4.232e-05	2	0	0	0	0.5
CCT3	T-complex protein 1 subunit gamma isoform a [Homo sapiens]	2.51311	0.000490603	1.32948	3.30927	0.00152533	0.00184696	0.00158728	0.0020588	0.00175459	119	145	111	115	122.5	0.00097411	0.0005472	0.00064602	0.00062537	0.000698175	64	24	19	7	28.5
HYOU1	gi|195976805|ref|NP_001124463.1|:hypoxia up-regulated protein 1 precursor [Homo sapiens] ;gi|530397769|ref|XP_005271451.1|:PREDICTED: hypoxia up-regulated protein 1 isoform X6 [Homo sapiens] ;	2.49548	0.0406208	1.31932	1.39125	7.692e-05	0.00020152	0.00019503	9.767e-05	0.000142785	11	29	25	10	18.75	7.473e-05	4.975e-05	5.565e-05	4.874e-05	5.72175e-05	9	4	3	1	4.25
	PREDICTED: sterol-4-alpha-carboxylate 3-dehydrogenase, decarboxylating isoform X1 [Homo sapiens]	2.49206	0.137282	1.31734	0.862388	0	9.306e-05	2.089e-05	5.232e-05	5.54233e-05	0	5	1	2	2	2.224e-05	0	0	0	2.224e-05	1	0	0	0	0.25
BTF3	transcription factor BTF3 isoform B [Homo sapiens]	2.48242	0.00240972	1.31175	2.61803	0.00125053	0.00092132	0.00105837	0.00152577	0.001189	29	21.5	22	25.3333	24.4583	0.00051205	0.00034517	0.00045754	0.00060111	0.000478967	10	4.5	4	2	5.125
TCP1	T-complex protein 1 subunit alpha isoform a [Homo sapiens]	2.46388	5.34049e-06	1.30093	5.27242	0.00419647	0.00388303	0.00378457	0.00408878	0.00398821	334	311	270	233	287	0.00195444	0.00145269	0.00166641	0.00140114	0.00161867	131	65	50	16	65.5
RPL22	60S ribosomal protein L22 proprotein [Homo sapiens]	2.44766	0.00675025	1.2914	2.17068	0.00152813	0.00216938	0.00267899	0.00289658	0.00231827	28	40	44	38	37.5	0.00051845	0.00097079	0.00115815	0.00114116	0.000947138	8	10	8	3	7.25
SHC1	gi|194239662|ref|NP_892113.4|:SHC-transforming protein 1 isoform 1 [Homo sapiens] ;gi|194239664|ref|NP_001123512.1|:SHC-transforming protein 1 isoform 3 [Homo sapiens] ;gi|194239668|ref|NP_001123513.1|:SHC-transforming protein 1 isoform 4 [Homo sapiens] ;gi|32261324|ref|NP_003020.2|:SHC-transforming protein 1 isoform 2 [Homo sapiens] ;gi|530365298|ref|XP_005245506.1|:PREDICTED: SHC-transforming p…	2.43718	0.00930946	1.28521	2.03108	0.00014379	0.00020243	0.00012031	0.00011715	0.00014592	12	17	9	7	11.25	2.846e-05	6.394e-05	6.357e-05	8.352e-05	5.98725e-05	2	3	2	1	2
PPIP5K2	gi|443287655|ref|NP_001263206.1|:inositol hexakisphosphate and diphosphoinositol-pentakisphosphate kinase 2 isoform 1 [Homo sapiens] ;gi|527317388|ref|NP_001268400.1|:inositol hexakisphosphate and diphosphoinositol-pentakisphosphate kinase 2 isoform 3 [Homo sapiens] ;gi|530379793|ref|XP_005271992.1|:PREDICTED: inositol hexakisphosphate and diphosphoinositol-pentakisphosphate kinase 2 isoform X3 […	2.40623	0.194306	1.26677	0.711514	0	6.702e-05	5.016e-05	7.065e-05	6.261e-05	0	12	8	9	7.25	1.335e-05	1.999e-05	4.472e-05	0	2.602e-05	2	2	3	0	1.75
ACTN4	alpha-actinin-4 [Homo sapiens]	2.40058	0.00831757	1.26338	2.08	0.00023005	0.00028164	0.00029257	0.00024633	0.000262648	30	36.96	34.2	23	31.04	0.00015369	0.00018982	4.068e-05	5.345e-05	0.00010941	16.8792	13.9167	2	1	8.44897
MSTO1	gi|374717330|ref|NP_001243461.1|:protein misato homolog 1 isoform b [Homo sapiens] ;gi|374717332|ref|NP_001243462.1|:protein misato homolog 1 isoform c [Homo sapiens] ;gi|39780571|ref|NP_060586.2|:protein misato homolog 1 isoform a [Homo sapiens] ;gi|578801179|ref|XP_006711475.1|:PREDICTED: protein misato homolog 1 isoform X1 [Homo sapiens] ;gi|578801181|ref|XP_006711476.1|:PREDICTED: protein mis…	2.39515	0.0114216	1.26011	1.94227	2.455e-05	7.32e-05	9.588e-05	8.574e-05	6.98425e-05	2	6	7	5	5	2.916e-05	0	0	0	2.916e-05	2	0	0	0	0.5
PIK3C2A	PREDICTED: phosphatidylinositol 4-phosphate 3-kinase C2 domain-containing subunit alpha isoform X3 [Homo sapiens]	2.39053	0.0145189	1.25733	1.83807	8.287e-05	9.882e-05	4.622e-05	6.944e-05	7.43375e-05	20	24	10	12	16.5	4.92e-05	2.211e-05	2.198e-05	0	3.10967e-05	10	3	2	0	3.75
OBSL1	gi|144226847|ref|NP_056126.1|:obscurin-like protein 1 isoform 1 precursor [Homo sapiens] ;gi|291084513|ref|NP_001166879.1|:obscurin-like protein 1 isoform 3 precursor [Homo sapiens] ;gi|291084534|ref|NP_001166902.1|:obscurin-like protein 1 isoform 2 precursor [Homo sapiens] ;gi|530370073|ref|XP_005246478.1|:PREDICTED: obscurin-like protein 1 isoform X4 [Homo sapiens] ;gi|530370077|ref|XP_00524648…	2.38015	0.247026	1.25105	0.607258	1.474e-05	0	1.644e-05	0	1.559e-05	4	0	4	0	2	0	6.55e-06	0	0	6.55e-06	0	1	0	0	0.25
BAG3	gi|14043024|ref|NP_004272.2|:BAG family molecular chaperone regulator 3 [Homo sapiens] ;gi|530394628|ref|XP_005270344.1|:PREDICTED: BAG family molecular chaperone regulator 3 isoform X1 [Homo sapiens] ;	2.37611	0.00541879	1.2486	2.2661	0.00015794	0.0001328	0.00010843	0.00010181	0.000125245	13	11	8	6	9.5	2.885e-05	6.483e-05	6.445e-05	0	5.271e-05	2	3	2	0	1.75
TSEN34	gi|537361048|ref|NP_001269261.1|:tRNA-splicing endonuclease subunit Sen34 isoform 1 [Homo sapiens] ;gi|537361050|ref|NP_001269262.1|:tRNA-splicing endonuclease subunit Sen34 isoform 2 [Homo sapiens] ;gi|578847472|ref|XP_006726266.1|:PREDICTED: tRNA-splicing endonuclease subunit Sen34 isoform X1 [Homo sapiens] ;	2.3657	0.0170838	1.24227	1.76742	4.507e-05	0.00013436	0.00020112	0.0001259	0.000126612	2	6	8	4	5	5.352e-05	0	0	0	5.352e-05	2	0	0	0	0.5
RNH1	ribonuclease inhibitor [Homo sapiens]	2.34961	0.00638837	1.23242	2.19461	9.092e-05	0.00012047	8.453e-05	4.233e-05	8.45625e-05	6	8	5	2	5.25	3.599e-05	0	0	0	3.599e-05	2	0	0	0	0.5
ZNF622	zinc finger protein 622 [Homo sapiens]	2.33517	0.0532225	1.22353	1.2739	0.00011716	0.00017464	0.00017972	4.091e-05	0.000128108	8	12	11	2	8.25	3.478e-05	5.21e-05	7.77e-05	0	5.486e-05	2	2	2	0	1.5
FERMT2	gi|201861813|ref|NP_001128471.1|:fermitin family homolog 2 isoform 2 [Homo sapiens] ;gi|201861823|ref|NP_001128472.1|:fermitin family homolog 2 isoform 3 [Homo sapiens] ;gi|29789006|ref|NP_006823.1|:fermitin family homolog 2 isoform 1 [Homo sapiens] ;gi|530402995|ref|XP_005267342.1|:PREDICTED: fermitin family homolog 2 isoform X1 [Homo sapiens] ;gi|578825426|ref|XP_006720071.1|:PREDICTED: fermiti…	2.3291	0.0252209	1.21977	1.59824	0.0001932	0.00013136	9.075e-05	9.942e-05	0.000128683	19	13	8	7	11.75	8.452e-05	5.426e-05	2.697e-05	0	5.525e-05	7	3	1	0	2.75
BTF3L4	transcription factor BTF3 homolog 4 isoform 1 [Homo sapiens]	2.32893	0.00995819	1.21967	2.00182	0.0009727	0.00140598	0.00152909	0.00092629	0.00120852	22	32	31	15	25	0.00026251	0.00070782	0.00058641	0	0.000518913	5	9	5	0	4.75
CCT4	T-complex protein 1 subunit delta isoform a [Homo sapiens]	2.32309	0.00076648	1.21604	3.1155	0.00139974	0.00146825	0.0015182	0.00148435	0.00146763	108	114	105	82	102.25	0.00087723	0.00062246	0.00075635	0.000271	0.00063176	57	27	22	3	27.25
NTPCR	cancer-related nucleoside-triphosphatase [Homo sapiens]	2.31907	0.704806	1.21355	0.151931	0	0	0.00036916	5.135e-05	0.000210255	0	0	9	1	2.5	4.366e-05	0.0001308	9.753e-05	0	9.06633e-05	1	2	1	0	1
IGF2BP3	insulin-like growth factor 2 mRNA-binding protein 3 [Homo sapiens]	2.29991	0.0789792	1.20157	1.10249	0.00011084	6.938e-05	6.196e-05	0	8.07267e-05	9.18699	5.7869	4.60357	0	4.89437	3.51e-05	0	0	0	3.51e-05	2.45	0	0	0	0.6125
RPS18	40S ribosomal protein S18 [Homo sapiens]	2.29328	0.208078	1.19741	0.681774	0	0.0003197	0.00020509	0.00019257	0.00023912	0	7	4	3	3.5	0.00010915	8.175e-05	0.00012191	0	0.00010427	2	1	1	0	1
CMTR2	PREDICTED: cap-specific mRNA (nucleoside-2'-O-)-methyltransferase 2 isoform X2 [Homo sapiens]	2.277	0.256403	1.18714	0.591077	5.443e-05	9.02e-06	1.012e-05	0	2.45233e-05	6	1	1	0	2	1.077e-05	0	0	0	1.077e-05	1	0	0	0	0.25
SLC25A6	ADP/ATP translocase 3 [Homo sapiens]	2.26738	0.0228349	1.18103	1.6414	0.00065054	0.00096287	0.00113031	0.00080216	0.00088647	27.751	41.3333	43.2202	24.5	34.2011	0.00075664	0.00029189	0.00012437	0	0.000390967	27.1818	7	2	0	9.04545
CAMKK1	calcium/calmodulin-dependent protein kinase kinase 1 isoform a [Homo sapiens]	2.25965	0.0655598	1.1761	1.18336	0.0002905	0.0002062	0.00016976	3.864e-05	0.000176275	21	15	11	2	12.25	0.00013141	2.461e-05	0	0	7.801e-05	8	1	0	0	2.25
HK2	gi|15553127|ref|NP_000180.2|:hexokinase-2 [Homo sapiens] ;gi|530367515|ref|XP_005264337.1|:PREDICTED: hexokinase-2 isoform X1 [Homo sapiens] ;	2.24871	0.629985	1.1691	0.20067	3.047e-05	0	0	0	3.047e-05	4	0	0	0	1	0	1.355e-05	0	0	1.355e-05	0	1	0	0	0.25
ARF1	ADP-ribosylation factor 1 [Homo sapiens]	2.24601	0.0353472	1.16737	1.45164	0.00223951	0.00127674	0.00088268	0.00109967	0.00137465	58.0256	33.2886	20.5	20.4	33.0536	0.00064162	0.00050345	0.00069105	0	0.00061204	14	7.33333	6.75	0	7.02083
RPL35	60S ribosomal protein L35 [Homo sapiens]	2.24312	0.00872135	1.16551	2.05942	0.00034077	0.00033863	0.00050689	0.00047595	0.00041556	6	6	8	6	6.5	6.744e-05	0.00030308	0	0	0.00018526	1	3	0	0	1
SRP68	gi|24497620|ref|NP_055045.2|:signal recognition particle subunit SRP68 isoform 1 [Homo sapiens] ;gi|386781688|ref|NP_001247431.1|:signal recognition particle subunit SRP68 isoform 2 [Homo sapiens] ;	2.21028	0.0167388	1.14423	1.77628	0.00025626	0.00060895	0.00054691	0.00045128	0.00046585	23	55	44	29	37.75	0.00018522	0.000218	0.00020688	0.00023296	0.000210765	14	11	7	3	8.75
TNPO3	transportin-3 isoform 1 [Homo sapiens]	2.20889	0.0139677	1.14332	1.85487	0.00017408	0.00011282	0.00010132	0.0001797	0.00014198	23	15	12	17	16.75	7.19e-05	8.078e-05	4.015e-05	0	6.42767e-05	8	6	2	0	4
TMED2	transmembrane emp24 domain-containing protein 2 precursor [Homo sapiens]	2.20581	0.154232	1.14131	0.811826	6.951e-05	0.00044899	0.00011632	0.00024271	0.000219383	2	13	3	5	5.75	8.254e-05	0.00012364	9.219e-05	0	9.94567e-05	2	2	1	0	1.25
CRBN	gi|291045198|ref|NP_001166953.1|:protein cereblon isoform 2 [Homo sapiens] ;gi|39545580|ref|NP_057386.2|:protein cereblon isoform 1 [Homo sapiens] ;	2.20255	0.26707	1.13918	0.573375	4.752e-05	0	3.534e-05	0	4.143e-05	3	0	2	0	1.25	1.881e-05	0	0	0	1.881e-05	1	0	0	0	0.25
KRT14	keratin, type I cytoskeletal 14 [Homo sapiens]	2.19605	0.296261	1.13491	0.528326	5.52e-05	0.00082353	0.00044958	0.00134073	0.00066726	3.7297	55.9936	27.2285	64.859	37.9527	1.757e-05	0.00022539	0.00076611	0.00020631	0.000303845	1	8.56131	19.5139	2	7.76881
TOMM40	gi|193083122|ref|NP_001122389.1|:mitochondrial import receptor subunit TOM40 homolog [Homo sapiens] ;gi|530415486|ref|XP_005258468.1|:PREDICTED: mitochondrial import receptor subunit TOM40 homolog isoform X1 [Homo sapiens] ;	2.17787	0.0315767	1.12292	1.50063	0.00056118	0.00048075	0.00058289	0.00021622	0.00046026	29	25	27	8	22.25	0.00022978	0.00027537	0.00020532	0.00013487	0.000211335	10	8	4	1	5.75
YWHAZ	gi|530389315|ref|XP_005251117.1|:PREDICTED: 14-3-3 protein zeta/delta isoform X1 [Homo sapiens] ;gi|530389321|ref|XP_005251120.1|:PREDICTED: 14-3-3 protein zeta/delta isoform X4 [Homo sapiens] ;	2.17011	0.495511	1.11777	0.304947	0	1.947e-05	0	5.082e-05	3.5145e-05	0	1.07692	0	2	0.769231	2.16e-05	1.079e-05	0	0	1.6195e-05	1	0.333333	0	0	0.333333
MTPAP	poly(A) RNA polymerase, mitochondrial precursor [Homo sapiens]	2.16841	0.00836657	1.11664	2.07745	0.00048012	0.00035784	0.00037494	0.00026823	0.000370282	40	30	28	16	28.5	0.00022805	0.00019216	9.552e-05	0.00016732	0.000170762	16	9	3	2	7.5
BZW1	gi|333470717|ref|NP_001193996.1|:basic leucine zipper and W2 domain-containing protein 1 isoform 1 [Homo sapiens] ;gi|333470719|ref|NP_001193997.1|:basic leucine zipper and W2 domain-containing protein 1 isoform 2 [Homo sapiens] ;gi|333470721|ref|NP_001193998.1|:basic leucine zipper and W2 domain-containing protein 1 isoform 3 [Homo sapiens] ;	2.1627	0.11701	1.11283	0.931777	0.0003001	0.00011598	7.44e-05	2.329e-05	0.000128442	18	7	4	1	7.5	5.939e-05	0	0	0	5.939e-05	3	0	0	0	0.75
DNAJA3	gi|205360838|ref|NP_005138.3|:dnaJ homolog subfamily A member 3, mitochondrial isoform 1 [Homo sapiens] ;gi|205360840|ref|NP_001128582.1|:dnaJ homolog subfamily A member 3, mitochondrial isoform 2 [Homo sapiens] ;	2.15749	0.0759337	1.10936	1.11957	0.0001892	0.0001157	0.00019484	0	0.00016658	13	8	12	0	8.25	0	0	7.721e-05	0	7.721e-05	0	0	2	0	0.5
LDHB	L-lactate dehydrogenase B chain [Homo sapiens]	2.15576	0.0281196	1.1082	1.55099	0.00041831	0.00067765	0.00051131	0.00024982	0.000464273	20	32.6034	21.913	8.55172	20.7671	0.00024836	0.00021464	0.00018309	0	0.000215363	10	5.76923	3.3	0	4.76731
ATAD3A	ATPase family AAA domain-containing protein 3A isoform 2 [Homo sapiens]	2.15206	0.0350658	1.10572	1.45512	0.00011379	0.00024057	0.00023939	0.00024975	0.000210875	9.54545	20.3077	18	15	15.7133	0.00015056	3.181e-05	0.00012649	8.309e-05	9.79875e-05	10.6364	1.5	4	1	4.28409
KRT1	keratin, type II cytoskeletal 1 [Homo sapiens]	2.15122	0.0260327	1.10515	1.58448	0.00208334	0.00363583	0.00368803	0.00301457	0.00310544	192.059	337.29	304.756	198.975	258.27	0.00071157	0.00169493	0.00253614	0.00083166	0.00144357	55.243	87.842	88.1399	11	60.5562
ARPC4	gi|311771647|ref|NP_001185709.1|:actin-related protein 2/3 complex subunit 4 isoform c [Homo sapiens] ;gi|311771694|ref|NP_001185722.1|:ARPC4-TTLL3 fusion protein [Homo sapiens] ;gi|5031595|ref|NP_005709.1|:actin-related protein 2/3 complex subunit 4 isoform a [Homo sapiens] ;	2.14478	0.0816316	1.10083	1.08814	3.736e-05	0.00014849	0.0001667	0.00031306	0.000166403	1	4	4	6	3.75	8.872e-05	6.645e-05	0	0	7.7585e-05	2	1	0	0	0.75
TSFM	elongation factor Ts, mitochondrial isoform 2 precursor [Homo sapiens]	2.12664	0.0360266	1.08858	1.44338	0.00051587	0.00046992	0.00043164	0.00027019	0.000421905	24	22	18	9	18.25	0.00035733	0.0002294	5.702e-05	0.00014981	0.00019839	14	6	1	1	5.5
ACTR3	actin-related protein 3 isoform 1 [Homo sapiens]	2.12252	0.0108491	1.08578	1.96461	0.00038438	0.00033215	0.00035425	0.00037347	0.000361062	23	20	19	16	19.5	0.00019845	0.00026755	4.433e-05	0	0.00017011	10	9	1	0	5
RPL7L1	gi|50053872|ref|NP_940888.2|:60S ribosomal protein L7-like 1 [Homo sapiens] ;gi|530381827|ref|XP_005249083.1|:PREDICTED: 60S ribosomal protein L7-like 1 isoform X1 [Homo sapiens] ;	2.11458	0.0500982	1.08037	1.30018	0.00017038	0.00011288	0.00028513	0.00011899	0.000171845	6	4	9	3	5.5	6.744e-05	0.00010103	7.533e-05	0	8.12667e-05	2	2	1	0	1.25
TMED10	transmembrane emp24 domain-containing protein 10 precursor [Homo sapiens]	2.10987	0.00403273	1.07716	2.3944	0.00038278	0.00025359	0.00032028	0.00040097	0.000339405	12	8	9	9	9.5	0.00015151	0.00017022	0	0	0.000160865	4	3	0	0	1.75
ABLIM1	gi|51173711|ref|NP_002304.3|:actin-binding LIM protein 1 isoform a [Homo sapiens] ;gi|51173713|ref|NP_001003407.1|:actin-binding LIM protein 1 isoform b [Homo sapiens] ;gi|51173715|ref|NP_001003408.1|:actin-binding LIM protein 1 isoform c [Homo sapiens] ;gi|530393664|ref|XP_005269875.1|:PREDICTED: actin-binding LIM protein 1 isoform X1 [Homo sapiens] ;gi|530393666|ref|XP_005269876.1|:PREDICTED: a…	2.10952	0.463424	1.07691	0.334022	0	5.354e-05	7.012e-05	0	6.183e-05	0	6	7	0	3.25	4.265e-05	1.597e-05	0	0	2.931e-05	4	1	0	0	1.25
TSG101	gi|530395742|ref|XP_005253164.1|:PREDICTED: tumor susceptibility gene 101 protein isoform X1 [Homo sapiens] ;gi|530395744|ref|XP_005253165.1|:PREDICTED: tumor susceptibility gene 101 protein isoform X2 [Homo sapiens] ;gi|5454140|ref|NP_006283.1|:tumor susceptibility gene 101 protein [Homo sapiens] ;	2.10313	0.374464	1.07254	0.42659	7.22e-05	1.794e-05	0	0	4.507e-05	4	1	0	0	1.25	2.143e-05	0	0	0	2.143e-05	1	0	0	0	0.25
TMEM256	transmembrane protein 256 precursor [Homo sapiens]	2.10005	0.282962	1.07043	0.548272	0.00018546	0.00012287	0	0	0.000154165	3	2	0	0	1.25	7.341e-05	0	0	0	7.341e-05	1	0	0	0	0.25
CDC25C	gi|12408658|ref|NP_073720.1|:M-phase inducer phosphatase 3 isoform b [Homo sapiens] ;gi|530380283|ref|XP_005272202.1|:PREDICTED: M-phase inducer phosphatase 3 isoform X2 [Homo sapiens] ;gi|530380285|ref|XP_005272203.1|:PREDICTED: M-phase inducer phosphatase 3 isoform X3 [Homo sapiens] ;gi|567316253|ref|NP_001274511.1|:M-phase inducer phosphatase 3 isoform a [Homo sapiens] ;gi|567316256|ref|NP_001…	2.09625	0.127493	1.06781	0.894514	5.239e-05	5.207e-05	5.845e-05	0	5.43033e-05	3	3	3	0	2.25	2.074e-05	3.107e-05	0	0	2.5905e-05	1	1	0	0	0.5
KRT16	keratin, type I cytoskeletal 16 [Homo sapiens]	2.08176	0.295924	1.05781	0.528819	0.00017696	0.00147051	0.00010804	0.00205839	0.000953475	11.9819	100.195	6.55713	99.7877	54.6303	0.00022799	0.0001461	0.00099995	0	0.000458013	13	5.56131	25.5243	0	11.0214
RPN2	gi|35493916|ref|NP_002942.2|:dolichyl-diphosphooligosaccharide--protein glycosyltransferase subunit 2 isoform 1 precursor [Homo sapiens] ;gi|530418269|ref|XP_005260548.1|:PREDICTED: dolichyl-diphosphooligosaccharide--protein glycosyltransferase subunit 2 isoform X1 [Homo sapiens] ;	2.07349	0.0263818	1.05206	1.5787	0.00050926	0.00062709	0.00043228	0.00044842	0.000504262	46	57	35	29	41.75	0.00035494	0.00039385	0.00014683	7.716e-05	0.000243195	27	20	5	1	13.25
MEN1	gi|18860847|ref|NP_570711.1|:menin isoform 2 [Homo sapiens] ;gi|18860857|ref|NP_570716.1|:menin isoform 1 [Homo sapiens] ;gi|578821429|ref|XP_006718620.1|:PREDICTED: menin isoform X4 [Homo sapiens] ;	2.05788	0.0332203	1.04116	1.4786	2.29e-05	5.69e-05	6.388e-05	7.997e-05	5.59125e-05	2	5	5	5	4.25	1.36e-05	4.074e-05	0	0	2.717e-05	1	2	0	0	0.75
NDE1	gi|221316642|ref|NP_001137451.1|:nuclear distribution protein nudE homolog 1 [Homo sapiens] ;gi|578840022|ref|XP_006725263.1|:PREDICTED: nuclear distribution protein nudE homolog 1 isoform X1 [Homo sapiens] ;gi|578840024|ref|XP_006725264.1|:PREDICTED: nuclear distribution protein nudE homolog 1 isoform X2 [Homo sapiens] ;gi|578840026|ref|XP_006725265.1|:PREDICTED: nuclear distribution protein nud…	2.05696	0.0134175	1.04052	1.87233	0.00031279	0.00022795	0.0003257	0.00043688	0.00032583	15	11	14	15	13.75	0.00012381	0.00018546	0.00016594	0	0.000158403	5	5	3	0	3.25
NUBP1	gi|118572611|ref|NP_002475.2|:cytosolic Fe-S cluster assembly factor NUBP1 isoform 1 [Homo sapiens] ;gi|511772980|ref|NP_001265435.1|:cytosolic Fe-S cluster assembly factor NUBP1 isoform 2 [Homo sapiens] ;	2.05217	0.0916878	1.03715	1.03769	4.366e-05	0.00015186	0.00014613	3.049e-05	9.3035e-05	2	7	6	1	4	5.184e-05	3.883e-05	0	0	4.5335e-05	2	1	0	0	0.75
PCBP2	gi|193083108|ref|NP_001122383.1|:poly(rC)-binding protein 2 isoform d [Homo sapiens] ;gi|193083110|ref|NP_001122384.1|:poly(rC)-binding protein 2 isoform e [Homo sapiens] ;	2.04896	0.131523	1.03489	0.880997	0.00064342	0.00028364	0.00020509	0.00026352	0.000348917	33.25	14.75	9.5	9.75	16.8125	0.0002068	0.00018071	0.00019249	0.00010116	0.00017029	9	5.25	3.75	0.75	4.6875
MYH14	gi|116284394|ref|NP_079005.3|:myosin-14 isoform 2 [Homo sapiens] ;gi|224831241|ref|NP_001139281.1|:myosin-14 isoform 3 [Homo sapiens] ;gi|578834906|ref|XP_006723449.1|:PREDICTED: myosin-14 isoform X1 [Homo sapiens] ;	2.04351	0.100555	1.03105	0.997596	0	1.064e-05	1.207e-05	5e-06	9.23667e-06	0	3.05717	3.08892	1.0233	1.79235	4.52e-06	0	0	0	4.52e-06	1.08814	0	0	0	0.272035
KDELR2	gi|154736713|ref|NP_001094073.1|:ER lumen protein retaining receptor 2 isoform 2 [Homo sapiens] ;gi|5803050|ref|NP_006845.1|:ER lumen protein retaining receptor 2 isoform 1 [Homo sapiens] ;	2.04325	0.209576	1.03086	0.678658	0	0.00018661	0.000419	0.00020983	0.000271813	0	5	10	4	4.75	0	6.681e-05	0.00019925	0	0.00013303	0	1	2	0	0.75
EMC1	gi|22095331|ref|NP_055862.1|:ER membrane protein complex subunit 1 isoform 1 precursor [Homo sapiens] ;gi|406719586|ref|NP_001258356.1|:ER membrane protein complex subunit 1 isoform 2 precursor [Homo sapiens] ;gi|406719590|ref|NP_001258358.1|:ER membrane protein complex subunit 1 isoform 4 precursor [Homo sapiens] ;gi|530360927|ref|XP_005245844.1|:PREDICTED: ER membrane protein complex subunit 1 …	2.03491	0.0668483	1.02496	1.17491	5.628e-05	3.495e-05	3.924e-05	7.861e-05	5.227e-05	8	5	5	8	6.5	8.35e-06	5.005e-05	1.866e-05	0	2.56867e-05	1	4	1	0	1.5
HLA-DQB1	gi|150418002|ref|NP_002114.3|:HLA class II histocompatibility antigen, DQ beta 1 chain isoform 1 precursor [Homo sapiens] ;gi|345461081|ref|NP_001230890.1|:HLA class II histocompatibility antigen, DQ beta 1 chain isoform 2 precursor [Homo sapiens] ;	2.02704	0.243523	1.01938	0.61346	2.677e-05	0.00010639	0.0002986	0	0.00014392	1	4	10	0	3.75	0	0	7.1e-05	0	7.1e-05	0	0	1	0	0.25
NDUFA13	NADH dehydrogenase [ubiquinone] 1 alpha subcomplex subunit 13 [Homo sapiens]	2.02279	0.992581	1.01635	0.00323393	0.00014554	0	0	0	0.00014554	3	0	0	0	0.75	5.761e-05	8.629e-05	0	0	7.195e-05	1	1	0	0	0.5
PCBP2	gi|14141166|ref|NP_114366.1|:poly(rC)-binding protein 2 isoform b [Homo sapiens] ;gi|193083110|ref|NP_001122384.1|:poly(rC)-binding protein 2 isoform e [Homo sapiens] ;	2.01908	0.15607	1.0137	0.80668	0.00065129	0.00026368	0.00019376	0.00026279	0.00034288	33.75	13.75	9	9.75	16.5625	0.00020623	0.00018021	0.00019196	0.00010088	0.00016982	9	5.25	3.75	0.75	4.6875
CBWD5	gi|119120938|ref|NP_001020087.2|:COBW domain-containing protein 5 isoform a [Homo sapiens] ;gi|126722884|ref|NP_060961.3|:COBW domain-containing protein 1 isoform 1 [Homo sapiens] ;gi|223941779|ref|NP_001138828.1|:COBW domain-containing protein 1 isoform 3 [Homo sapiens] ;gi|530390010|ref|XP_005251570.1|:PREDICTED: COBW domain-containing protein 1 isoform X1 [Homo sapiens] ;gi|530390012|ref|XP_00…	2.00128	0.216016	1.00092	0.665513	0	6.002e-05	0.00013476	5.624e-05	8.36733e-05	0	3	6	2	2.75	4.781e-05	3.581e-05	0	0	4.181e-05	2	1	0	0	0.75
USP15	ubiquitin carboxyl-terminal hydrolase 15 isoform 1 [Homo sapiens]	1.99243	0.0248792	0.994526	1.60416	2.848e-05	8.492e-05	7.944e-05	5.968e-05	6.313e-05	4	12	10	6	8	2.537e-05	3.8e-05	0	0	3.1685e-05	3	3	0	0	1.5
KRT10	gi|195972866|ref|NP_000412.3|:keratin, type I cytoskeletal 10 [Homo sapiens] ;gi|530412176|ref|XP_005257400.1|:PREDICTED: keratin, type I cytoskeletal 10 isoform X1 [Homo sapiens] ;	1.99043	0.0701577	0.993079	1.15392	0.0039201	0.00196371	0.00354818	0.00159632	0.00275708	327.716	165.198	265.883	95.5475	213.586	0.00080963	0.00188212	0.0016817	0.00116722	0.00138517	57	88.4556	53	14	53.1139
KIAA0391	gi|375493513|ref|NP_001243607.1|:mitochondrial ribonuclease P protein 3 isoform 2 [Homo sapiens] ;gi|375493516|ref|NP_001243608.1|:mitochondrial ribonuclease P protein 3 isoform 3 [Homo sapiens] ;gi|578826335|ref|XP_006720397.1|:PREDICTED: mitochondrial ribonuclease P protein 3 isoform X2 [Homo sapiens] ;	1.98668	0.216815	0.990363	0.663911	0	3.673e-05	5.498e-05	1.721e-05	3.63067e-05	0	3	4	1	2	1.463e-05	2.192e-05	0	0	1.8275e-05	1	1	0	0	0.5
MTAP	S-methyl-5'-thioadenosine phosphorylase [Homo sapiens]	1.98449	0.0904597	0.988766	1.04354	0.00061711	0.00051513	0.00088123	0.00072401	0.00068437	25	21	32	21	24.75	0.00079141	0.00021954	0.00019644	0.00017205	0.00034486	27	5	3	1	9
OTUB1	ubiquitin thioesterase OTUB1 [Homo sapiens]	1.98402	0.0401321	0.988429	1.39651	0.00025778	0.00012808	0.00017255	0.00010801	0.000166605	10	5	6	3	6	9.183e-05	9.171e-05	6.838e-05	0	8.39733e-05	3	2	1	0	1.5
CAMK2D	gi|26667180|ref|NP_001212.2|:calcium/calmodulin-dependent protein kinase type II subunit delta isoform 3 [Homo sapiens] ;gi|26667186|ref|NP_742125.1|:calcium/calmodulin-dependent protein kinase type II subunit delta isoform 1 [Homo sapiens] ;gi|26667189|ref|NP_742126.1|:calcium/calmodulin-dependent protein kinase type II subunit delta isoform 2 [Homo sapiens] ;gi|530378226|ref|XP_005263308.1|:PRE…	1.96793	0.0502266	0.976678	1.29907	0.000126	0.00030606	0.00024989	0.00019553	0.00021937	9	22	16	10	14.25	9.974e-05	0.00017431	7.427e-05	9.757e-05	0.000111473	6	7	2	1	4
KIAA1524	gi|190194355|ref|NP_065941.2|:protein CIP2A [Homo sapiens] ;gi|530375085|ref|XP_005247739.1|:PREDICTED: protein CIP2A isoform X1 [Homo sapiens] ;gi|578807635|ref|XP_006713779.1|:PREDICTED: protein CIP2A isoform X2 [Homo sapiens] ;gi|578807637|ref|XP_006713780.1|:PREDICTED: protein CIP2A isoform X3 [Homo sapiens] ;	1.95977	0.445255	0.970684	0.351391	0.00010035	3.068e-05	2.583e-05	0	5.22867e-05	13	4	3	0	5	4.583e-05	1.373e-05	2.048e-05	0	2.668e-05	5	1	1	0	1.75
NUDC	nuclear migration protein nudC [Homo sapiens]	1.95576	0.00192006	0.967729	2.71669	0.00312353	0.00285231	0.00313149	0.00241712	0.00288111	148	136	133	82	124.75	0.00085207	0.00165181	0.00162351	0.00176518	0.00147314	34	44	29	12	29.75
BTF3	transcription factor BTF3 isoform A [Homo sapiens]	1.95366	0.259666	0.966178	0.585585	0	0.00072453	0.00083231	0.00059994	0.000718927	0	21.5	22	12.6667	14.0417	0	0.00027144	0.00035981	0.00047272	0.00036799	0	4.5	4	2	2.625
MAGED2	melanoma-associated antigen D2 [Homo sapiens]	1.94668	0.0683122	0.961013	1.1655	0.00024153	0.00018257	0.0001286	0.0001127	0.00016635	20.9524	15.9375	10	7	13.4725	0.00016426	6.152e-05	3.058e-05	0	8.54533e-05	12	3	1	0	4
HSPE1	10 kDa heat shock protein, mitochondrial [Homo sapiens]	1.92425	0.0302969	0.944298	1.5186	0.00013698	0.00018149	0.00042787	0.00019131	0.000234413	2	2.66667	5.6	2	3.06667	0	0.00012182	0	0	0.00012182	0	1	0	0	0.25
NXF1	nuclear RNA export factor 1 isoform 1 [Homo sapiens]	1.91647	0.00896081	0.938455	2.04765	0.000237	0.00024673	0.00025181	0.00031525	0.000262698	21	22	20	20	20.75	0.00016081	0.0001606	8.981e-05	0	0.000137073	12	8	3	0	5.75
HNRNPH2	heterogeneous nuclear ribonucleoprotein H2 [Homo sapiens]	1.90793	0.0816793	0.932009	1.08789	0	0.00016164	0.0002465	0.00024214	0.00021676	0	10.4545	14.2017	11.1429	8.94977	0	0.00011361	0	0	0.00011361	0	4.10526	0	0	1.02632
SNX30	sorting nexin-30 [Homo sapiens]	1.90768	0.16861	0.93182	0.773116	0.00015986	9.531e-05	0.00012484	0	0.00012667	10	6	7	0	5.75	7.593e-05	5.687e-05	0	0	6.64e-05	4	2	0	0	1.5
SLC19A1	gi|327199314|ref|NP_001192135.1|:folate transporter 1 isoform 2 [Homo sapiens] ;gi|327199316|ref|NP_001192136.1|:folate transporter 1 isoform 3 [Homo sapiens] ;gi|34808710|ref|NP_919231.1|:folate transporter 1 isoform 1 [Homo sapiens] ;gi|530419328|ref|XP_005261221.1|:PREDICTED: folate transporter 1 isoform X2 [Homo sapiens] ;	1.90389	0.0803528	0.928951	1.095	2.857e-05	2.839e-05	0	3.991e-05	3.229e-05	2	2	0	2	1.5	1.696e-05	0	0	0	1.696e-05	1	0	0	0	0.25
	gi|574584848|ref|NP_001276103.1|:vacuolar protein sorting-associated protein 52 homolog isoform 2 [Homo sapiens] ;gi|574584850|ref|NP_001276104.1|:vacuolar protein sorting-associated protein 52 homolog isoform 3 [Homo sapiens] ;gi|578842349|ref|XP_006726168.1|:PREDICTED: vacuolar protein sorting-associated protein 52 homolog isoform X1 [Homo sapiens] ;	1.89693	0.242294	0.923669	0.615658	0.00027687	0.00011641	0.00010692	5.949e-05	0.000139923	26	11	9	4	12.5	0.00012645	3.788e-05	5.65e-05	7.422e-05	7.37625e-05	10	2	2	1	3.75
STX5	gi|347658920|ref|NP_001231595.1|:syntaxin-5 isoform 2 [Homo sapiens] ;gi|94400932|ref|NP_003155.2|:syntaxin-5 isoform 1 [Homo sapiens] ;	1.89555	0.0782941	0.922615	1.10627	0	8.65e-05	7.284e-05	6.079e-05	7.33767e-05	0	4	3	2	2.25	0	3.871e-05	0	0	3.871e-05	0	1	0	0	0.25
SLC25A11	mitochondrial 2-oxoglutarate/malate carrier protein isoform 1 [Homo sapiens]	1.8915	0.0597525	0.919528	1.22364	0.00035596	0.00077379	0.00052122	0.00068361	0.000583645	16	35	21	22	23.5	0.00021134	0.00039574	0.00047211	0.00015506	0.000308562	8	10	8	1	6.75
ZFYVE20	PREDICTED: rabenosyn-5 isoform X3 [Homo sapiens]	1.8873	0.000630717	0.916322	3.20017	0.00054353	0.00046044	0.00044733	0.00044802	0.00047483	61	52	45	36	48.5	0.00024335	0.00026944	0.00030727	0.00018631	0.000251593	23	17	13	3	14
ABL1	gi|62362412|ref|NP_009297.2|:tyrosine-protein kinase ABL1 isoform b [Homo sapiens] ;gi|62362414|ref|NP_005148.2|:tyrosine-protein kinase ABL1 isoform a [Homo sapiens] ;	1.88252	0.69326	0.912662	0.159104	0	0	2.035e-05	0	2.035e-05	0	0	3	0	0.75	0	1.081e-05	0	0	1.081e-05	0	1	0	0	0.25
ZNF146	PREDICTED: zinc finger protein OZF isoform X1 [Homo sapiens]	1.88118	0.0409574	0.911637	1.38767	0.00016747	0.00016642	0.00024021	0.00010024	0.000168585	7	7	9	3	6.5	5.682e-05	8.511e-05	0.00012692	0	8.96167e-05	2	2	2	0	1.5
TMA7	translation machinery-associated protein 7 [Homo sapiens]	1.87902	0.693982	0.909982	0.158652	0	0	0.00024354	0	0.00024354	0	0	2	0	0.5	0.00012961	0	0	0	0.00012961	1	0	0	0	0.25
FOXO3	gi|42519916|ref|NP_963853.1|:forkhead box protein O3 [Homo sapiens] ;gi|530383466|ref|XP_005266924.1|:PREDICTED: forkhead box protein O3 isoform X1 [Homo sapiens] ;	1.87835	0.694123	0.909462	0.158564	0	0	2.316e-05	0	2.316e-05	0	0	2	0	0.5	1.233e-05	0	0	0	1.233e-05	1	0	0	0	0.25
ECH1	delta(3,5)-Delta(2,4)-dienoyl-CoA isomerase, mitochondrial precursor [Homo sapiens]	1.862	0.131973	0.896856	0.879516	2.13e-05	0.00021165	0.00016632	0.00014873	0.000137	1	10	7	5	5.75	5.058e-05	0.00011365	5.65e-05	0	7.35767e-05	2	3	1	0	1.5
TPD52L1	gi|4507641|ref|NP_003278.1|:tumor protein D53 isoform 1 [Homo sapiens] ;gi|51173746|ref|NP_001003396.1|:tumor protein D53 isoform 3 [Homo sapiens] ;gi|51173748|ref|NP_001003397.1|:tumor protein D53 isoform 4 [Homo sapiens] ;gi|530384010|ref|XP_005267178.1|:PREDICTED: tumor protein D53 isoform X2 [Homo sapiens] ;gi|530384014|ref|XP_005267180.1|:PREDICTED: tumor protein D53 isoform X4 [Homo sapiens…	1.85332	0.0419889	0.890113	1.37687	0.00020546	0.00027224	0.00034383	0.00043045	0.000312995	6	8	9	9	8	8.133e-05	0.00024365	0.00018167	0	0.000168883	2	4	2	0	2
DIAPH2	gi|5803003|ref|NP_006720.1|:protein diaphanous homolog 2 isoform 156 [Homo sapiens] ;gi|6382071|ref|NP_009293.1|:protein diaphanous homolog 2 isoform 12C [Homo sapiens] ;	1.84279	0.0967441	0.881894	1.01438	2.538e-05	7.566e-05	8.494e-05	3.545e-05	5.53575e-05	4	12	12	4	8	2.26e-05	3.386e-05	3.366e-05	0	3.004e-05	3	3	2	0	2
PIK3C3	phosphatidylinositol 3-kinase catalytic subunit type 3 [Homo sapiens]	1.84182	0.00897138	0.881135	2.04714	4.725e-05	3.913e-05	5.272e-05	3.3e-05	4.3025e-05	6	5	6	3	5	1.87e-05	2.802e-05	0	0	2.336e-05	2	2	0	0	1
RPL11	gi|15431290|ref|NP_000966.2|:60S ribosomal protein L11 isoform 1 [Homo sapiens] ;gi|315221152|ref|NP_001186731.1|:60S ribosomal protein L11 isoform 2 [Homo sapiens] ;	1.83763	0.0738546	0.87785	1.13162	0.00239399	0.00156	0.00267078	0.00131554	0.00198508	61	40	61	24	46.5	0.00186408	0.00090752	0.00072873	0.00082061	0.00108023	40	13	7	3	15.75
NUBP2	cytosolic Fe-S cluster assembly factor NUBP2 isoform 1 [Homo sapiens]	1.83736	0.0674598	0.877635	1.17096	0.00064444	0.00069164	0.00048889	0.00025202	0.000519247	25	27	17	7	19	0.0003367	0.00022926	0.00020513	0.00035933	0.000282605	11	5	3	2	5.25
CLEC16A	gi|343478149|ref|NP_001230332.1|:protein CLEC16A isoform 2 [Homo sapiens] ;gi|530407822|ref|XP_005255267.1|:PREDICTED: protein CLEC16A isoform X2 [Homo sapiens] ;gi|530407828|ref|XP_005255270.1|:PREDICTED: protein CLEC16A isoform X5 [Homo sapiens] ;	1.83566	0.344263	0.876298	0.46311	3.855e-05	2.299e-05	5.161e-05	0	3.77167e-05	5	3	6	0	3.5	2.747e-05	1.372e-05	2.045e-05	0	2.05467e-05	3	1	1	0	1.25
RPS15A	40S ribosomal protein S15a [Homo sapiens]	1.82259	0.0111258	0.865987	1.95367	0.00322419	0.00384481	0.00257782	0.00345245	0.00327482	60	72	43	46	55.25	0.00185046	0.00114702	0.00156796	0.00262175	0.0017968	29	12	11	7	14.75
KIAA0368	gi|122937211|ref|NP_001073867.1|:proteasome-associated protein ECM29 homolog [Homo sapiens] ;gi|530390829|ref|XP_005251907.1|:PREDICTED: proteasome-associated protein ECM29 homolog isoform X1 [Homo sapiens] ;gi|530390835|ref|XP_005251910.1|:PREDICTED: proteasome-associated protein ECM29 homolog isoform X4 [Homo sapiens] ;gi|530390837|ref|XP_005251911.1|:PREDICTED: proteasome-associated protein EC…	1.81491	0.00364227	0.859899	2.43863	0.00020434	0.00023404	0.0001816	0.00014996	0.000192485	59	68	47	31	51.25	0.00010693	0.00010473	9.187e-05	0.0001207	0.000106057	26	17	10	5	14.5
RAB3GAP2	rab3 GTPase-activating protein non-catalytic subunit [Homo sapiens]	1.80439	0.0069255	0.851511	2.15955	0.00079737	0.00096181	0.00082242	0.00058135	0.000790737	159	193	147	83	145.5	0.00036325	0.0005263	0.00047889	0.00038448	0.00043823	61	59	36	11	41.75
GOLPH3	Golgi phosphoprotein 3 [Homo sapiens]	1.80439	0.0538295	0.851509	1.26898	0.00014065	0.0005125	0.00033998	0.00026193	0.000313765	6	22	13	8	12.25	0.00022269	0.00012509	0	0	0.00017389	8	3	0	0	2.75
SNX1	gi|23111032|ref|NP_683758.1|:sorting nexin-1 isoform b [Homo sapiens] ;gi|23111034|ref|NP_003090.2|:sorting nexin-1 isoform a [Homo sapiens] ;gi|530406332|ref|XP_005254667.1|:PREDICTED: sorting nexin-1 isoform X1 [Homo sapiens] ;	1.79305	0.0173461	0.842418	1.7608	0.00029044	0.00030559	0.00022038	0.0003053	0.000280428	19	20.1176	12.9231	14.3	16.5852	9.076e-05	0.00017569	0.00020274	0	0.000156397	5	6.46154	5	0	4.11538
CACYBP	gi|530364570|ref|XP_005245149.1|:PREDICTED: calcyclin-binding protein isoform X1 [Homo sapiens] ;gi|7656952|ref|NP_055227.1|:calcyclin-binding protein isoform 1 [Homo sapiens] ;	1.79232	0.0727861	0.841832	1.13795	0.00162371	0.00157602	0.00105316	0.00110754	0.00134011	43	42	25	21	32.75	0.0005829	0.00134336	0.00080132	0.00026319	0.000747692	13	20	8	1	10.5
SLC25A21	gi|13449279|ref|NP_085134.1|:mitochondrial 2-oxodicarboxylate carrier isoform 1 [Homo sapiens] ;gi|283837920|ref|NP_001164641.1|:mitochondrial 2-oxodicarboxylate carrier isoform 2 [Homo sapiens] ;	1.78473	0.105495	0.835705	0.976769	0	4.643e-05	7.819e-05	9.79e-05	7.41733e-05	0	2	3	3	2	0	4.156e-05	0	0	4.156e-05	0	1	0	0	0.25
	PREDICTED: acetyl-CoA carboxylase 2 isoform X7 [Homo sapiens]	1.78408	0.0331338	0.835181	1.47973	0.0006074	0.00108053	0.00099077	0.00101929	0.000924497	196.156	351.147	286.804	235.682	267.447	0.00063337	0.00063151	0.00059207	0.00021582	0.000518192	172.254	114.653	72.0822	10	92.2473
NDUFA10	NADH dehydrogenase [ubiquinone] 1 alpha subcomplex subunit 10, mitochondrial precursor [Homo sapiens]	1.78406	0.0803048	0.835167	1.09526	0.00019678	0.0002151	0.00039516	0.00027484	0.00027047	10	11	18	10	12.25	0.0002804	7.001e-05	0.0001044	0	0.000151603	12	2	2	0	4
DDX6	PREDICTED: probable ATP-dependent RNA helicase DDX6 isoform X1 [Homo sapiens]	1.78352	0.130379	0.834728	0.884793	0.00037604	0.00035932	0.00043566	0.00026261	0.000358407	26	25	27	13	22.75	0.00018892	0.00043736	7.673e-05	0.00010081	0.000200955	11	17	2	1	7.75
ECI2	gi|260274832|ref|NP_996667.2|:enoyl-CoA delta isomerase 2, mitochondrial isoform 2 [Homo sapiens] ;gi|260275230|ref|NP_001159482.1|:enoyl-CoA delta isomerase 2, mitochondrial isoform 1 [Homo sapiens] ;gi|578811337|ref|XP_006715020.1|:PREDICTED: enoyl-CoA delta isomerase 2, mitochondrial isoform X1 [Homo sapiens] ;	1.77672	0.307196	0.829218	0.512585	0	3.524e-05	3.956e-05	0	3.74e-05	0	2	2	0	1	2.105e-05	0	0	0	2.105e-05	1	0	0	0	0.25
ERLIN2	gi|530387547|ref|XP_005273448.1|:PREDICTED: erlin-2 isoform X1 [Homo sapiens] ;gi|530387549|ref|XP_005273449.1|:PREDICTED: erlin-2 isoform X2 [Homo sapiens] ;gi|578815174|ref|XP_006716343.1|:PREDICTED: erlin-2 isoform X4 [Homo sapiens] ;	1.77505	0.0605633	0.827859	1.21779	0.00017038	0.00027706	0.00029377	0.00021634	0.000239387	11	18	17	10	14	0.00023911	0.00011021	8.217e-05	0.00010796	0.000134863	13	4	2	1	5
SDCBP	gi|55749504|ref|NP_001007069.1|:syntenin-1 isoform 2 [Homo sapiens] ;gi|56243522|ref|NP_005616.2|:syntenin-1 isoform 1 [Homo sapiens] ;	1.76002	0.19664	0.815594	0.706329	9.569e-05	0.00011887	0.00016014	0	0.0001249	4	5	6	0	3.75	5.682e-05	8.511e-05	0	0	7.0965e-05	2	2	0	0	1
MRPL41	39S ribosomal protein L41, mitochondrial [Homo sapiens]	1.75047	0.194226	0.807741	0.711692	0	0.00020269	0.00022755	0.00028487	0.00023837	0	4	4	4	3	0.00018165	9.07e-05	0	0	0.000136175	3	1	0	0	1
SFXN4	sideroflexin-4 [Homo sapiens]	1.74999	0.150021	0.807345	0.823847	0.0006426	0.00026779	0.00027751	0.00023162	0.00035488	31	13	12	8	16	0.00022153	0.00033185	5.499e-05	0	0.00020279	9	9	1	0	4.75
	PREDICTED: ankyrin repeat domain-containing protein 27 isoform X2 [Homo sapiens]	1.74828	0.218434	0.80594	0.660679	3.327e-05	1.983e-05	2.969e-05	0	2.75967e-05	5	3	4	0	3	7.9e-06	2.367e-05	0	0	1.5785e-05	1	2	0	0	0.75
SASS6	spindle assembly abnormal protein 6 homolog [Homo sapiens]	1.74505	0.0808635	0.80327	1.09225	2.127e-05	2.113e-05	2.372e-05	0	2.204e-05	2	2	2	0	1.5	1.263e-05	0	0	0	1.263e-05	1	0	0	0	0.25
CKB	creatine kinase B-type [Homo sapiens]	1.73349	0.145914	0.793678	0.835904	0.00025669	0.00030975	0.00024546	0.0002817	0.0002734	14	17	12	11	13.5	0.0003919	3.261e-05	4.864e-05	0	0.000157717	18	1	1	0	5
TTC27	gi|301898023|ref|NP_001180438.1|:tetratricopeptide repeat protein 27 isoform 2 [Homo sapiens] ;gi|42476022|ref|NP_060205.3|:tetratricopeptide repeat protein 27 isoform 1 [Homo sapiens] ;gi|530367806|ref|XP_005264473.1|:PREDICTED: tetratricopeptide repeat protein 27 isoform X1 [Homo sapiens] ;	1.71351	0.131262	0.776956	0.881861	5.286e-05	3.502e-05	1.966e-05	0	3.58467e-05	6	4	2	0	3	2.092e-05	0	0	0	2.092e-05	2	0	0	0	0.5
ARF5	ADP-ribosylation factor 5 [Homo sapiens]	1.71016	0.204876	0.774132	0.688509	0.00123494	0.00114869	0.00088758	0.00027645	0.000886915	31.8205	29.7846	20.5	5.1	21.8013	0.00032259	0.00070875	0.00023163	0.00081149	0.000518615	7	10.2667	2.25	3	5.62917
ATP6AP2	renin receptor precursor [Homo sapiens]	1.70939	0.0842395	0.773481	1.07448	0	5.95e-05	6.68e-05	5.575e-05	6.06833e-05	0	3	3	2	2	0	3.55e-05	0	0	3.55e-05	0	1	0	0	0.25
PCNA	proliferating cell nuclear antigen [Homo sapiens]	1.70642	0.0262013	0.770971	1.58168	0.00096355	0.00098412	0.00056734	0.00074766	0.000815667	36	37	19	20	28	0.00050852	0.00042849	0.00049699	0	0.000478	16	9	7	0	8
ACTR2	gi|5031571|ref|NP_005713.1|:actin-related protein 2 isoform b [Homo sapiens] ;gi|53692187|ref|NP_001005386.1|:actin-related protein 2 isoform a [Homo sapiens] ;	1.70436	0.0820093	0.769233	1.08614	0.00021276	0.00033477	0.00013846	0.00017335	0.000214835	12	19	7	7	11.25	0.00018948	9.461e-05	9.406e-05	0	0.00012605	9	3	2	0	3.5
CC2D1A	PREDICTED: coiled-coil and C2 domain-containing protein 1A isoform X3 [Homo sapiens]	1.70423	0.328473	0.76912	0.4835	0.00010204	0.00042517	0.00014676	0.00017172	0.000211422	13.8333	58	17.8333	16.6667	26.5833	1.752e-05	0.00018589	0.00017285	0.00011997	0.000124058	2	14.1667	8.83333	2.33333	6.83333
PDLIM3	PDZ and LIM domain protein 3 isoform b [Homo sapiens]	1.68952	0.426432	0.756609	0.37015	0.00011053	0.00017575	0.00022196	0	0.000169413	5	8	9	0	5.5	2.625e-05	0.00015729	0.00011728	0	0.000100273	1	4	2	0	1.75
PPP1R12C	gi|14149716|ref|NP_060077.1|:protein phosphatase 1 regulatory subunit 12C isoform a [Homo sapiens] ;gi|410442518|ref|NP_001258547.1|:protein phosphatase 1 regulatory subunit 12C isoform b [Homo sapiens] ;gi|530416745|ref|XP_005259070.1|:PREDICTED: protein phosphatase 1 regulatory subunit 12C isoform X1 [Homo sapiens] ;	1.68731	0.0884351	0.754724	1.05338	9.826e-05	5.326e-05	0.00010963	2.495e-05	7.1525e-05	11	6	11	2	7.5	2.122e-05	6.356e-05	0	0	4.239e-05	2	4	0	0	1.5
C12orf23	gi|22748615|ref|NP_689474.1|:UPF0444 transmembrane protein C12orf23 [Homo sapiens] ;gi|530400971|ref|XP_005269273.1|:PREDICTED: UPF0444 transmembrane protein C12orf23 isoform X1 [Homo sapiens] ;	1.68558	0.0603446	0.753244	1.21936	6.022e-05	0.00023938	0.00013437	0.00016822	0.000150548	1	4	2	2	2.25	7.151e-05	0.00010712	0	0	8.9315e-05	1	1	0	0	0.5
GALK2	gi|4503897|ref|NP_002035.1|:N-acetylgalactosamine kinase isoform 1 [Homo sapiens] ;gi|530405634|ref|XP_005254336.1|:PREDICTED: N-acetylgalactosamine kinase isoform X1 [Homo sapiens] ;gi|578826798|ref|XP_006720524.1|:PREDICTED: N-acetylgalactosamine kinase isoform X7 [Homo sapiens] ;gi|578826802|ref|XP_006720526.1|:PREDICTED: N-acetylgalactosamine kinase isoform X9 [Homo sapiens] ;gi|578826804|ref…	1.6847	0.738659	0.752496	0.131556	3.051e-05	0	0	0	3.051e-05	2	0	0	0	0.5	1.811e-05	0	0	0	1.811e-05	1	0	0	0	0.25
ZC3H3	gi|155722994|ref|NP_055932.2|:zinc finger CCCH domain-containing protein 3 [Homo sapiens] ;gi|578815906|ref|XP_006716598.1|:PREDICTED: zinc finger CCCH domain-containing protein 3 isoform X6 [Homo sapiens] ;gi|578815908|ref|XP_006716599.1|:PREDICTED: zinc finger CCCH domain-containing protein 3 isoform X7 [Homo sapiens] ;gi|578815910|ref|XP_006716600.1|:PREDICTED: zinc finger CCCH domain-containi…	1.68457	0.738693	0.752382	0.131536	1.474e-05	0	0	0	1.474e-05	2	0	0	0	0.5	8.75e-06	0	0	0	8.75e-06	1	0	0	0	0.25
SNUPN	snurportin-1 [Homo sapiens]	1.68446	0.738721	0.752288	0.131519	3.881e-05	0	0	0	3.881e-05	2	0	0	0	0.5	2.304e-05	0	0	0	2.304e-05	1	0	0	0	0.25
MRPL10	gi|22547114|ref|NP_660298.2|:39S ribosomal protein L10, mitochondrial isoform a precursor [Homo sapiens] ;gi|22547125|ref|NP_683685.1|:39S ribosomal protein L10, mitochondrial isoform b [Homo sapiens] ;	1.68439	0.738739	0.752229	0.131509	0.00010706	0	0	0	0.00010706	4	0	0	0	1	6.356e-05	0	0	0	6.356e-05	2	0	0	0	0.5
ORC4	gi|300116159|ref|NP_001177808.1|:origin recognition complex subunit 4 isoform 1 [Homo sapiens] ;gi|300116166|ref|NP_001177811.1|:origin recognition complex subunit 4 isoform 3 [Homo sapiens] ;gi|578804404|ref|XP_006712619.1|:PREDICTED: origin recognition complex subunit 4 isoform X1 [Homo sapiens] ;	1.68436	0.738746	0.752203	0.131505	6.409e-05	0	0	0	6.409e-05	4	0	0	0	1	3.805e-05	0	0	0	3.805e-05	2	0	0	0	0.5
	gi|578830420|ref|XP_006721765.1|:PREDICTED: 2',3'-cyclic-nucleotide 3'-phosphodiesterase isoform X2 [Homo sapiens] ;gi|94721261|ref|NP_149124.3|:2',3'-cyclic-nucleotide 3'-phosphodiesterase [Homo sapiens] ;	1.68391	0.738863	0.751811	0.131436	3.484e-05	0	0	0	3.484e-05	2	0	0	0	0.5	2.069e-05	0	0	0	2.069e-05	1	0	0	0	0.25
	gi|578830806|ref|XP_006721916.1|:PREDICTED: acetyl-CoA carboxylase 1 isoform X4 [Homo sapiens] ;gi|578840344|ref|XP_006725383.1|:PREDICTED: acetyl-CoA carboxylase 1 isoform X1 [Homo sapiens] ;	1.68233	0.00691729	0.75046	2.16006	0.0065642	0.00513812	0.00494577	0.00649222	0.00578508	2231.69	1757.85	1507.2	1580.32	1769.26	0.00240908	0.00370087	0.00428282	0.00336215	0.00343873	689.746	707.347	548.918	164	527.503
CASP3	caspase-3 preproprotein [Homo sapiens]	1.68147	0.395597	0.749722	0.402747	7.566e-05	2.506e-05	0	0	5.036e-05	3	1	0	0	1	2.995e-05	0	0	0	2.995e-05	1	0	0	0	0.25
ACOT9	gi|530421012|ref|XP_005274527.1|:PREDICTED: acyl-coenzyme A thioesterase 9, mitochondrial isoform X1 [Homo sapiens] ;gi|530421016|ref|XP_005274529.1|:PREDICTED: acyl-coenzyme A thioesterase 9, mitochondrial isoform X3 [Homo sapiens] ;gi|81295404|ref|NP_001028755.2|:acyl-coenzyme A thioesterase 9, mitochondrial isoform b precursor [Homo sapiens] ;gi|81295407|ref|NP_001032248.1|:acyl-coenzyme A thi…	1.6804	0.130396	0.748805	0.884737	0.00010843	0.00021549	0.00012096	0.0001298	0.00014367	7	14	7	6	8.5	5.518e-05	0.00013776	4.109e-05	0.00010796	8.54975e-05	3	5	1	1	2.5
POLR1C	gi|42560246|ref|NP_976035.1|:DNA-directed RNA polymerases I and III subunit RPAC1 [Homo sapiens] ;gi|530382819|ref|XP_005249548.1|:PREDICTED: DNA-directed RNA polymerases I and III subunit RPAC1 isoform X1 [Homo sapiens] ;	1.67833	0.33695	0.747027	0.472435	0	8.025e-05	0.00022524	5.64e-05	0.00012063	0	4	10	2	4	7.192e-05	7.183e-05	0	0	7.1875e-05	3	2	0	0	1.25
TUBA1A	tubulin alpha-1A chain isoform 1 [Homo sapiens]	1.6782	0.157947	0.746919	0.801488	0.00261792	0.00246414	0.00311067	0.00216134	0.00258852	169.014	160.087	180.012	99.9052	152.255	0.0033449	0.00107566	0.00054362	0.00120555	0.00154243	181.859	39.0405	13.2308	11.1667	61.3242
PCCA	propionyl-CoA carboxylase alpha chain, mitochondrial isoform a precursor [Homo sapiens]	1.67627	0.0426894	0.745254	1.36968	0.00989326	0.00515883	0.00641244	0.00652694	0.00699787	1031	541	599	487	664.5	0.0053554	0.00336256	0.00376718	0.00421353	0.00417467	470	197	148	63	219.5
C21orf59	uncharacterized protein C21orf59 [Homo sapiens]	1.67413	0.741369	0.743408	0.129966	0	4.788e-05	0	0	4.788e-05	0	2	0	0	0.5	2.86e-05	0	0	0	2.86e-05	1	0	0	0	0.25
BSG	gi|38372919|ref|NP_001719.2|:basigin isoform 1 precursor [Homo sapiens] ;gi|530425374|ref|XP_005259676.1|:PREDICTED: basigin isoform X1 [Homo sapiens] ;	1.67332	0.741577	0.742712	0.129844	0	3.606e-05	0	0	3.606e-05	0	2	0	0	0.5	2.155e-05	0	0	0	2.155e-05	1	0	0	0	0.25
MCCC1	methylcrotonoyl-CoA carboxylase subunit alpha, mitochondrial precursor [Homo sapiens]	1.67103	0.000527962	0.740736	3.2774	0.0220749	0.0240146	0.0239177	0.0287324	0.0246849	2291	2508	2225	2135	2289.75	0.0139588	0.015854	0.0145688	0.0147076	0.0147723	1220	925	570	219	733.5
RPL23A	60S ribosomal protein L23a [Homo sapiens]	1.66441	0.0650426	0.735013	1.1868	0.00125385	0.0009345	0.00099916	0.00068799	0.000968875	28	21	20	11	20	0.00090396	0.00063724	0.00047514	0.00031211	0.000582113	17	8	4	1	7.5
ENO1	alpha-enolase isoform 1 [Homo sapiens]	1.6639	0.0323122	0.734573	1.49063	0.00360554	0.00254327	0.00280132	0.00184347	0.0026984	224	159	156	82	155.25	0.0018731	0.00143158	0.00183597	0.00134626	0.00162173	98	50	43	12	50.75
SLC25A10	gi|20149598|ref|NP_036272.2|:mitochondrial dicarboxylate carrier isoform 2 [Homo sapiens] ;gi|401461821|ref|NP_001257817.1|:mitochondrial dicarboxylate carrier isoform 1 [Homo sapiens] ;	1.66009	0.0213746	0.73126	1.6701	0.00099796	0.00077402	0.00081464	0.00057794	0.00079114	41	32	30	17	30	0.00031793	0.00056285	0.00051653	0.00050895	0.000476565	11	13	8	3	8.75
RPS23	40S ribosomal protein S23 [Homo sapiens]	1.65694	0.0937923	0.728523	1.02783	0.00591101	0.00344673	0.00430545	0.00225159	0.00397869	121	71	79	33	76	0.00185626	0.00243308	0.00259167	0.0027239	0.00240123	32	28	20	8	22
NBN	nibrin [Homo sapiens]	1.65409	0.0235952	0.726041	1.62718	0.00040766	0.00042352	0.00055815	0.00042703	0.00045409	44	46	54	33	44.25	0.00019803	0.00031312	0.00039322	0.00019373	0.000274525	18	19	16	3	14
PTDSS1	phosphatidylserine synthase 1 [Homo sapiens]	1.65252	0.306971	0.724665	0.512902	0	0.00010274	3.295e-05	0.00010314	7.961e-05	0	7	2	5	3.5	1.754e-05	7.881e-05	0	0	4.8175e-05	1	3	0	0	1
	PREDICTED: kinetochore-associated protein 1 isoform X1 [Homo sapiens]	1.65245	0.122733	0.724609	0.911037	4.111e-05	2.828e-05	2.822e-05	8.83e-06	2.661e-05	13	9	8	2	8	1.502e-05	1.125e-05	0	2.204e-05	1.61033e-05	4	2	0	1	1.75
SRP9	signal recognition particle 9 kDa protein isoform 2 [Homo sapiens]	1.64693	0.406197	0.71978	0.391263	0	0	0.00036248	0.00011345	0.000237965	0	0	4	1	1.25	0	0.00014449	0	0	0.00014449	0	1	0	0	0.25
SAE1	SUMO-activating enzyme subunit 1 isoform a [Homo sapiens]	1.64008	0.108194	0.713769	0.965795	0.00050475	0.00028089	0.00031534	0.000141	0.000310495	25	14	14	5	14.5	0.0001918	0.00021548	0.00016067	0	0.000189317	8	6	3	0	4.25
	gi|578839385|ref|XP_006725045.1|:PREDICTED: centrosomal protein of 170 kDa isoform X9 [Homo sapiens] ;gi|578839389|ref|XP_006725047.1|:PREDICTED: centrosomal protein of 170 kDa isoform X11 [Homo sapiens] ;	1.63853	0.632271	0.712405	0.199097	1.401e-05	0	5.21e-06	0	9.61e-06	3	0	1	0	1	5.54e-06	0	6.19e-06	0	5.865e-06	1	0	0.5	0	0.375
PKM	pyruvate kinase PKM isoform c [Homo sapiens]	1.63316	0.00529052	0.707667	2.2765	0.00030751	0.00016586	0.00023702	0.00021718	0.000231892	26.6316	14.4545	18.4	13.4667	18.2382	0	0.00014199	0	0	0.00014199	0	6.91304	0	0	1.72826
CETN2	centrin-2 [Homo sapiens]	1.62757	0.0328843	0.702716	1.48301	4.061e-05	8.072e-05	0.00013593	5.673e-05	7.84975e-05	1	2	3	1	1.75	4.823e-05	0	0	0	4.823e-05	1	0	0	0	0.25
PEX3	peroxisomal biogenesis factor 3 [Homo sapiens]	1.6236	0.212726	0.699198	0.67218	0	7.445e-05	6.268e-05	5.232e-05	6.315e-05	0	4	3	2	2.25	4.448e-05	3.331e-05	0	0	3.8895e-05	2	1	0	0	0.75
SFXN2	gi|30578418|ref|NP_849189.1|:sideroflexin-2 [Homo sapiens] ;gi|530393040|ref|XP_005269574.1|:PREDICTED: sideroflexin-2 isoform X1 [Homo sapiens] ;gi|578818899|ref|XP_006717681.1|:PREDICTED: sideroflexin-2 isoform X4 [Homo sapiens] ;	1.62024	0.163265	0.696212	0.787106	4.339e-05	0.00015091	0.00014522	0.00018181	0.000130332	2	7	6	6	5.25	5.152e-05	3.859e-05	0	0.00015121	8.044e-05	2	1	0	1	1
TUBB3	tubulin beta-3 chain isoform 1 [Homo sapiens]	1.61943	0.147296	0.695487	0.83181	0.00081734	0.0005516	0.00045547	0.00078817	0.000653145	52.6507	35.756	26.2991	36.3515	37.7643	0.00065553	0.00052055	9.507e-05	0.00034212	0.000403317	35.5615	18.8512	2.30864	3.1619	14.9708
DNAJC7	gi|262206280|ref|NP_003306.3|:dnaJ homolog subfamily C member 7 isoform 1 [Homo sapiens] ;gi|578831332|ref|XP_006722113.1|:PREDICTED: dnaJ homolog subfamily C member 7 isoform X1 [Homo sapiens] ;	1.6172	0.0237352	0.693498	1.62461	0.00018384	9.837e-05	0.00014199	0.0001185	0.000135675	13	7	9	6	8.75	6.717e-05	0.00010062	0	0	8.3895e-05	4	4	0	0	2
PURA	transcriptional activator protein Pur-alpha [Homo sapiens]	1.61249	0.0574282	0.689289	1.24087	0.00015186	0.00025871	0.00021783	0.00033331	0.000240427	7	12	9	11	9.75	0.00018033	0.00011577	0	0.00015121	0.000149103	7	3	0	1	2.75
GTF2A2	PREDICTED: transcription initiation factor IIA subunit 2 isoform X2 [Homo sapiens]	1.61204	0.18763	0.688891	0.726699	0.00019227	0.00082795	0.00050049	0.00080562	0.000581583	3	13	7	9	8	0.00022831	0.00068401	0.00017	0	0.000360773	3	6	1	0	2.5
MRPS10	gi|16554607|ref|NP_060611.2|:28S ribosomal protein S10, mitochondrial [Homo sapiens] ;gi|530382202|ref|XP_005249263.1|:PREDICTED: 28S ribosomal protein S10, mitochondrial isoform X1 [Homo sapiens] ;	1.61102	0.184524	0.687976	0.733947	0	0.00017269	7.755e-05	4.854e-05	9.95933e-05	0	5	2	1	2	0	6.182e-05	0	0	6.182e-05	0	1	0	0	0.25
IQGAP1	ras GTPase-activating-like protein IQGAP1 [Homo sapiens]	1.60751	0.143977	0.684829	0.841708	8.853e-05	0.00015501	0.00010818	6.477e-05	0.000104122	21	37	23	11	23	9.512e-05	6.749e-05	6.71e-05	2.938e-05	6.47725e-05	19	9	6	1	8.75
GCLM	glutamate--cysteine ligase regulatory subunit [Homo sapiens]	1.60728	0.110287	0.684622	0.957477	0.00058639	0.00121612	0.00139371	0.00074779	0.000986003	23	48	49	21	35.25	0.00045412	0.00068026	0.00060866	0.0007108	0.00061346	15	15	9	4	10.75
MRPS27	gi|186928850|ref|NP_055899.2|:28S ribosomal protein S27, mitochondrial isoform 2 [Homo sapiens] ;gi|557948093|ref|NP_001273677.1|:28S ribosomal protein S27, mitochondrial isoform 1 [Homo sapiens] ;gi|557948101|ref|NP_001273680.1|:28S ribosomal protein S27, mitochondrial isoform 3 [Homo sapiens] ;	1.60372	0.0111362	0.681418	1.95326	5.062e-05	3.354e-05	3.765e-05	7.07e-05	4.81275e-05	3	2	2	3	2.5	0	3.001e-05	0	0	3.001e-05	0	1	0	0	0.25
TIPRL	TIP41-like protein isoform 1 [Homo sapiens]	1.60199	0.114433	0.679866	0.941447	0.00046229	0.00058701	0.00048709	0.00053806	0.000518612	18	23	17	15	18.25	0.00018298	0.00031979	0.00061314	0.00017901	0.00032373	6	7	9	1	5.75
HSD17B4	gi|313151210|ref|NP_001186221.1|:peroxisomal multifunctional enzyme type 2 isoform 3 [Homo sapiens] ;gi|313482810|ref|NP_001186220.1|:peroxisomal multifunctional enzyme type 2 isoform 1 [Homo sapiens] ;gi|4504505|ref|NP_000405.1|:peroxisomal multifunctional enzyme type 2 isoform 2 [Homo sapiens] ;	1.58871	0.120544	0.667859	0.918855	4.865e-05	4.834e-05	8.683e-05	5.436e-05	5.9545e-05	5	5	8	4	5.5	6.932e-05	1.731e-05	2.581e-05	0	3.748e-05	6	1	1	0	2
CAPZB	gi|4826659|ref|NP_004921.1|:F-actin-capping protein subunit beta isoform 1 [Homo sapiens] ;gi|531990816|ref|NP_001269091.1|:F-actin-capping protein subunit beta isoform 4 [Homo sapiens] ;	1.5858	0.126842	0.665208	0.896736	0.00092458	0.00043388	0.00037248	0.00053806	0.00056725	36	17	13	15	20.25	0.00054895	0.00031979	0.00020438	0	0.000357707	18	7	3	0	7
STIP1	gi|544063423|ref|NP_001269581.1|:stress-induced-phosphoprotein 1 isoform a [Homo sapiens] ;gi|5803181|ref|NP_006810.1|:stress-induced-phosphoprotein 1 isoform b [Homo sapiens] ;	1.58362	0.173634	0.663228	0.760364	0.00027233	0.00032945	0.00047553	0.00029767	0.000343745	23	28	36	18	26.25	0.00040773	0.00018955	0.00018845	8.252e-05	0.000217062	29	9	6	1	11.25
SSR4	gi|325301072|ref|NP_001191455.1|:translocon-associated protein subunit delta isoform 1 precursor [Homo sapiens] ;gi|325301078|ref|NP_001191456.1|:translocon-associated protein subunit delta isoform 3 precursor [Homo sapiens] ;gi|5454090|ref|NP_006271.1|:translocon-associated protein subunit delta isoform 2 precursor [Homo sapiens] ;	1.58272	0.131137	0.662406	0.882274	0.00049356	0.00060365	0.00059298	0.00090145	0.00064791	13	16	14	17	15	0.00063115	0.00054027	0.00020142	0.00026462	0.000409365	14	8	2	1	6.25
MYO9B	gi|194272142|ref|NP_001123537.1|:unconventional myosin-IXb isoform 2 [Homo sapiens] ;gi|530414867|ref|XP_005259972.1|:PREDICTED: unconventional myosin-IXb isoform X1 [Homo sapiens] ;gi|578833269|ref|XP_006722818.1|:PREDICTED: unconventional myosin-IXb isoform X2 [Homo sapiens] ;gi|578833271|ref|XP_006722819.1|:PREDICTED: unconventional myosin-IXb isoform X3 [Homo sapiens] ;gi|578833274|ref|XP_006…	1.58221	0.252471	0.661943	0.597788	3.109e-05	3.777e-05	7.71e-06	9.65e-06	2.1555e-05	9	11	2	2	6	4.1e-06	1.844e-05	1.833e-05	0	1.36233e-05	1	3	2	0	1.5
DDX47	probable ATP-dependent RNA helicase DDX47 isoform 1 [Homo sapiens]	1.58101	0.062044	0.660848	1.2073	0.00032242	0.00028989	0.00039395	0.00036454	0.0003427	21	19	23	17	20	0.00021877	0.00024579	8.145e-05	0.00032103	0.00021676	12	9	2	3	6.5
SEPT6	gi|21361478|ref|NP_055944.2|:septin-6 isoform B [Homo sapiens] ;gi|22035581|ref|NP_665801.1|:septin-6 isoform D [Homo sapiens] ;gi|530422398|ref|XP_005262457.1|:PREDICTED: septin-6 isoform X1 [Homo sapiens] ;gi|578838655|ref|XP_006724811.1|:PREDICTED: septin-6 isoform X2 [Homo sapiens] ;gi|578838659|ref|XP_006724813.1|:PREDICTED: septin-6 isoform X4 [Homo sapiens] ;	1.57931	0.118375	0.659292	0.926742	0.00019212	0.00022539	0.00030112	0.00018884	0.000226868	11.9355	14.0909	16.7688	8.4	12.7988	0.00017643	0.00022905	5.693e-05	0.00011219	0.00014365	9.23077	8	1.33333	1	4.89103
ATL1	gi|189181742|ref|NP_001121185.1|:atlastin-1 isoform b [Homo sapiens] ;gi|19923445|ref|NP_056999.2|:atlastin-1 isoform a [Homo sapiens] ;	1.57917	0.767152	0.659163	0.115119	5.685e-05	0	0	0	5.685e-05	4.5	0	0	0	1.125	3.6e-05	0	0	0	3.6e-05	2.4	0	0	0	0.6
PGAM5	gi|281604136|ref|NP_001164014.1|:serine/threonine-protein phosphatase PGAM5, mitochondrial isoform 1 [Homo sapiens] ;gi|281604138|ref|NP_001164015.1|:serine/threonine-protein phosphatase PGAM5, mitochondrial isoform 2 [Homo sapiens] ;	1.57578	0.0400654	0.656066	1.39723	0.00065265	0.00050444	0.0004854	0.00054017	0.000545665	27	21	18	16	20.5	0.00048795	0.00034398	0.00038472	0.00016848	0.000346283	17	8	6	1	8
EIF2AK2	gi|208431827|ref|NP_001129123.1|:interferon-induced, double-stranded RNA-activated protein kinase isoform a [Homo sapiens] ;gi|208431829|ref|NP_001129124.1|:interferon-induced, double-stranded RNA-activated protein kinase isoform b [Homo sapiens] ;	1.57258	0.05561	0.653129	1.25485	7.607e-05	6.299e-05	0.0001273	1.771e-05	7.10175e-05	6	5	9	1	5.25	4.516e-05	0	0	0	4.516e-05	3	0	0	0	0.75
TMEM165	transmembrane protein 165 precursor [Homo sapiens]	1.57233	0.0653656	0.652906	1.18465	8.624e-05	6.428e-05	0.00019243	0.00030114	0.000161022	4	3	8	10	6.25	0.00010241	0	0	0	0.00010241	4	0	0	0	1
METTL2A	gi|165932358|ref|NP_859076.3|:methyltransferase-like protein 2A [Homo sapiens] ;gi|93141204|ref|NP_060866.2|:methyltransferase-like protein 2B [Homo sapiens] ;	1.57204	0.126216	0.652634	0.898885	7.392e-05	9.183e-05	4.124e-05	0	6.89967e-05	4	5	2	0	2.75	4.389e-05	0	0	0	4.389e-05	2	0	0	0	0.5
VDAC3	voltage-dependent anion-selective channel protein 3 isoform 1 [Homo sapiens]	1.57086	0.10286	0.651554	0.987753	0.00204882	0.00220771	0.00236832	0.00099982	0.00190617	83	90	86	29	72	0.00087935	0.0010099	0.00124409	0.00172048	0.00121346	30	23	19	10	20.5
PPP5C	gi|324021716|ref|NP_001191213.1|:serine/threonine-protein phosphatase 5 isoform 2 [Homo sapiens] ;gi|5453958|ref|NP_006238.1|:serine/threonine-protein phosphatase 5 isoform 1 [Homo sapiens] ;	1.57044	0.769659	0.65117	0.113702	0	0	0	4.091e-05	4.091e-05	0	0	0	2	0.5	0	2.605e-05	0	0	2.605e-05	0	1	0	0	0.25
RBFOX1	gi|215272410|ref|NP_001135805.1|:RNA binding protein fox-1 homolog 1 isoform 5 [Homo sapiens] ;gi|215272412|ref|NP_001135806.1|:RNA binding protein fox-1 homolog 1 isoform 4 [Homo sapiens] ;gi|22538405|ref|NP_665898.1|:RNA binding protein fox-1 homolog 1 isoform 1 [Homo sapiens] ;gi|22538407|ref|NP_665899.1|:RNA binding protein fox-1 homolog 1 isoform 2 [Homo sapiens] ;gi|22538409|ref|NP_665900.1…	1.56931	0.120394	0.650127	0.919396	1.888e-05	3.752e-05	8.425e-05	0.00010548	6.15325e-05	1	2	4	4	2.75	4.484e-05	3.358e-05	0	0	3.921e-05	2	1	0	0	0.75
KIAA1217	gi|50843820|ref|NP_062536.2|:sickle tail protein homolog isoform 1 [Homo sapiens] ;gi|530392259|ref|XP_005252557.1|:PREDICTED: sickle tail protein homolog isoform X1 [Homo sapiens] ;gi|530392263|ref|XP_005252559.1|:PREDICTED: sickle tail protein homolog isoform X3 [Homo sapiens] ;gi|530392265|ref|XP_005252560.1|:PREDICTED: sickle tail protein homolog isoform X4 [Homo sapiens] ;gi|530392267|ref|XP…	1.56876	0.194663	0.649625	0.710716	4.674e-05	3.573e-05	7.22e-05	4.017e-05	4.871e-05	13	10	18	8	12.25	5.123e-05	3.837e-05	9.54e-06	2.506e-05	3.105e-05	12	6	1	1	5
PCCB	propionyl-CoA carboxylase beta chain, mitochondrial isoform 1 precursor [Homo sapiens]	1.56851	0.0213945	0.649391	1.6697	0.00797074	0.00524193	0.00562456	0.00559348	0.00610768	615	407	389	309	430	0.00449386	0.00373475	0.00436617	0.002981	0.00389395	292	162	127	33	153.5
YWHAB	14-3-3 protein beta/alpha [Homo sapiens]	1.56812	0.292704	0.649038	0.533572	5.679e-05	0.00021273	9.504e-05	3.966e-05	0.000101055	2	7.53846	3	1	3.38462	0.00010116	1.684e-05	7.533e-05	0	6.44433e-05	3	0.333333	1	0	1.08333
SNX17	gi|388596709|ref|NP_001253990.1|:sorting nexin-17 isoform 4 [Homo sapiens] ;gi|7661890|ref|NP_055563.1|:sorting nexin-17 isoform 1 [Homo sapiens] ;	1.56782	0.229888	0.648764	0.638484	4.657e-05	6.171e-05	0	4.336e-05	5.05467e-05	3	4	0	2	2.25	3.687e-05	2.761e-05	0	0	3.224e-05	2	1	0	0	0.75
PCBP2	gi|193083108|ref|NP_001122383.1|:poly(rC)-binding protein 2 isoform d [Homo sapiens] ;gi|193083110|ref|NP_001122384.1|:poly(rC)-binding protein 2 isoform e [Homo sapiens] ;	1.56711	0.334656	0.648109	0.475401	0.00066508	0.00023299	0.00018149	0.0002339	0.000328365	34.75	12.25	8.5	8.75	16.0625	0.00019318	0.00019575	0.00021577	0.00023344	0.000209535	8.5	5.75	4.25	1.75	5.0625
VDAC1	PREDICTED: voltage-dependent anion-selective channel protein 1 isoform X3 [Homo sapiens]	1.56519	0.222119	0.64634	0.653413	0.00069117	0.00029436	0.00038554	0.00027581	0.00041172	28	12	14	8	15.5	0.00011725	0.00026345	0.00032739	0.0003441	0.000263047	4	6	5	2	4.25
DDOST	dolichyl-diphosphooligosaccharide--protein glycosyltransferase 48 kDa subunit precursor [Homo sapiens]	1.56485	0.0300748	0.646025	1.5218	9.192e-05	0.00015224	0.00015382	8.559e-05	0.000120893	6	10	9	4	7.25	7.276e-05	8.175e-05	0	0	7.7255e-05	4	3	0	0	1.75
EDF1	gi|24497601|ref|NP_694880.1|:endothelial differentiation-related factor 1 isoform beta [Homo sapiens] ;gi|4503453|ref|NP_003783.1|:endothelial differentiation-related factor 1 isoform alpha [Homo sapiens] ;gi|526253086|ref|NP_001268226.1|:endothelial differentiation-related factor 1 isoform 3 [Homo sapiens] ;gi|526253088|ref|NP_001268227.1|:endothelial differentiation-related factor 1 isoform 4 […	1.56206	0.0256692	0.643453	1.59059	0.00045231	0.00039954	0.00044854	0.00042116	0.000430387	9	8	8	6	7.75	0.00041774	0	0.00013331	0	0.000275525	7	0	1	0	2
FAM21A	gi|530393641|ref|XP_005269864.1|:PREDICTED: WASH complex subunit FAM21A isoform X3 [Homo sapiens] ;gi|54124343|ref|NP_001005751.1|:WASH complex subunit FAM21A [Homo sapiens] ;	1.56107	0.153832	0.642533	0.812952	0.00043533	0.00059038	0.00047106	0.00048641	0.000495795	85	116	82.4444	68	87.8611	0.0004176	0.00055116	8.151e-05	0.00022013	0.0003176	68.6667	60.5	6	6.16667	35.3333
SH3GL1	endophilin-A2 isoform 1 [Homo sapiens]	1.55941	0.00558573	0.641004	2.25292	0.00047112	0.0005255	0.00043582	0.00055678	0.000497305	24.8182	27.8571	20.5789	21	23.5636	0.00027049	0.00033767	0.00040284	0.00026462	0.000318905	12	10	8	2	8
EGLN1	egl nine homolog 1 [Homo sapiens]	1.55627	0.312567	0.638089	0.505057	0	4.889e-05	0.00010977	4.581e-05	6.81567e-05	0	3	6	2	2.75	5.842e-05	2.917e-05	0	0	4.3795e-05	3	1	0	0	1
MRTO4	mRNA turnover protein 4 homolog [Homo sapiens]	1.55594	0.059235	0.637788	1.22742	0.00029229	0.00026141	0.00022826	8.165e-05	0.000215903	10	9	7	2	7	0.00017354	0.00010398	0	0	0.00013876	5	2	0	0	1.75
TBCB	gi|50428925|ref|NP_001272.2|:tubulin-folding cofactor B [Homo sapiens] ;gi|578833911|ref|XP_006723061.1|:PREDICTED: tubulin-folding cofactor B isoform X1 [Homo sapiens] ;	1.55508	0.0317494	0.636988	1.49827	0.00051534	0.00056902	0.0006388	0.00055982	0.000570745	18	20	20	14	18	0.00023798	0.00040741	0.00045567	0	0.00036702	7	8	6	0	5.25
MCCC2	methylcrotonoyl-CoA carboxylase beta chain, mitochondrial [Homo sapiens]	1.5524	0.0105014	0.634504	1.97875	0.0151875	0.0168926	0.0170542	0.018526	0.0169151	1224	1370	1232	1069	1223.75	0.0128774	0.0133752	0.0104995	0.00683212	0.010896	874	606	319	79	469.5
SBDS	ribosome maturation protein SBDS [Homo sapiens]	1.55178	0.116613	0.633924	0.933251	0.00011177	0.00016661	0.00024939	0.00015611	0.00017097	4	6	8	4	5.5	3.318e-05	0.00014911	0.00014824	0	0.000110177	1	3	2	0	1.5
POLDIP2	polymerase delta-interacting protein 2 [Homo sapiens]	1.55144	0.2595	0.633605	0.585862	0.0001139	0.00016978	0.00014824	0	0.000143973	6	9	7	0	5.5	0.00013525	0	5.035e-05	0	9.28e-05	6	0	1	0	1.75
RFTN1	gi|530372139|ref|XP_005265044.1|:PREDICTED: raftlin isoform X3 [Homo sapiens] ;gi|530372141|ref|XP_005265045.1|:PREDICTED: raftlin isoform X4 [Homo sapiens] ;gi|578805882|ref|XP_006713132.1|:PREDICTED: raftlin isoform X5 [Homo sapiens] ;	1.55062	0.664366	0.632847	0.177593	0	0.00010134	0.00011377	0	0.000107555	0	8	8	0	4	3.027e-05	9.07e-05	6.763e-05	8.885e-05	6.93625e-05	2	4	2	1	2.25
RPS6	40S ribosomal protein S6 [Homo sapiens]	1.54476	0.181371	0.627383	0.741433	0.00241274	0.00178429	0.00159624	0.00097961	0.00169322	86	64	51	25	56.5	0.00183227	0.00099808	0.00096745	0.00058662	0.0010961	55	20	13	3	22.75
TTC4	tetratricopeptide repeat protein 4 [Homo sapiens]	1.54378	0.186295	0.626469	0.729799	7.22e-05	8.969e-05	0.0001611	5.042e-05	9.33525e-05	4	5	8	2	4.75	2.143e-05	6.422e-05	9.576e-05	0	6.047e-05	1	2	2	0	1.25
PCBP2	gi|14141168|ref|NP_005007.2|:poly(rC)-binding protein 2 isoform a [Homo sapiens] ;gi|193083108|ref|NP_001122383.1|:poly(rC)-binding protein 2 isoform d [Homo sapiens] ;	1.54308	0.372937	0.625814	0.428364	0.00067281	0.00021338	0.00017035	0.00023326	0.00032245	35.25	11.25	8	8.75	15.8125	0.00019265	0.00019522	0.00021518	0.00023281	0.000208965	8.5	5.75	4.25	1.75	5.0625
ALDH2	aldehyde dehydrogenase, mitochondrial isoform 1 precursor [Homo sapiens]	1.54303	0.292421	0.625767	0.533992	9.651e-05	0.00021484	0.00027134	7.549e-05	0.000164545	7.14286	16	18	4	11.2857	5.689e-05	0.00011216	0.00013978	0.00011772	0.000106637	3.54545	4.66667	3.9	1.25	3.34053
LDHA	gi|260099723|ref|NP_001158886.1|:L-lactate dehydrogenase A chain isoform 3 [Homo sapiens] ;gi|5031857|ref|NP_005557.1|:L-lactate dehydrogenase A chain isoform 1 [Homo sapiens] ;	1.54054	0.0374226	0.623437	1.42687	0.00032897	0.00054606	0.00056318	0.00060672	0.000511233	17	28.3966	26.087	22.4483	23.4829	0.00034467	0.00031774	0.00039525	0.00026975	0.000331853	15	9.23077	7.7	2	8.48269
CLIP1	gi|351542242|ref|NP_001234926.1|:CAP-Gly domain-containing linker protein 1 isoform c [Homo sapiens] ;gi|38044112|ref|NP_937883.1|:CAP-Gly domain-containing linker protein 1 isoform b [Homo sapiens] ;gi|4506751|ref|NP_002947.1|:CAP-Gly domain-containing linker protein 1 isoform a [Homo sapiens] ;gi|578824105|ref|XP_006719614.1|:PREDICTED: CAP-Gly domain-containing linker protein 1 isoform X4 [Hom…	1.54046	0.0877566	0.623363	1.05672	9.72e-06	2.414e-05	3.252e-05	1.357e-05	1.99875e-05	2	5	6	2	3.75	1.731e-05	8.64e-06	0	0	1.2975e-05	3	1	0	0	1
DOLPP1	dolichyldiphosphatase 1 isoform a [Homo sapiens]	1.53317	0.0556703	0.616521	1.25438	0.00020546	0.00011667	0.00032745	0.00020498	0.00021364	7	4	10	5	6.5	0.00017427	0.00010442	0	0	0.000139345	5	2	0	0	1.75
MCTS1	gi|212276121|ref|NP_001131026.1|:malignant T-cell-amplified sequence 1 isoform 2 [Homo sapiens] ;gi|7662502|ref|NP_054779.1|:malignant T-cell-amplified sequence 1 isoform 1 [Homo sapiens] ;	1.52753	0.367099	0.611204	0.435217	0	0	8.564e-05	5.361e-05	6.9625e-05	0	0	2	1	0.75	4.558e-05	0	0	0	4.558e-05	1	0	0	0	0.25
CCDC88A	girdin isoform 2 [Homo sapiens]	1.52388	0.220973	0.607751	0.65566	6.444e-05	5.273e-05	7.612e-05	3.706e-05	5.75875e-05	17	14	18	7	14	5.401e-05	6.068e-05	1.005e-05	2.642e-05	3.779e-05	12	9	1	1	5.75
KRT18	keratin, type I cytoskeletal 18 [Homo sapiens]	1.52147	0.1249	0.605462	0.903438	0.00086645	0.0020127	0.00184496	0.00171799	0.00161053	53.3333	124.67	101.795	75.7143	88.8783	0.00059242	0.001416	0.00120663	0.00101909	0.00105853	30.7097	49	28	9	29.1774
DNAJB6	dnaJ homolog subfamily B member 6 isoform a [Homo sapiens]	1.51666	0.163687	0.600902	0.785986	0.00027857	0.00034071	0.00031078	0.00023943	0.000292373	13	16	13	8	12.5	0.00040713	0.00011435	5.684e-05	0	0.000192773	16	3	1	0	5
ANAPC7	gi|212549736|ref|NP_057322.2|:anaphase-promoting complex subunit 7 isoform a [Homo sapiens] ;gi|212549738|ref|NP_001131136.1|:anaphase-promoting complex subunit 7 isoform b [Homo sapiens] ;gi|578823866|ref|XP_006719513.1|:PREDICTED: anaphase-promoting complex subunit 7 isoform X4 [Homo sapiens] ;	1.51098	0.133467	0.595483	0.874627	9.33e-05	9.271e-05	9.108e-05	3.258e-05	7.74175e-05	8	8	7	2	6.25	0	4.149e-05	3.094e-05	8.128e-05	5.12367e-05	0	2	1	1	1
TRIP13	gi|11321607|ref|NP_004228.1|:pachytene checkpoint protein 2 homolog isoform 1 [Homo sapiens] ;gi|530378994|ref|XP_005248445.1|:PREDICTED: pachytene checkpoint protein 2 homolog isoform X1 [Homo sapiens] ;	1.50883	0.0934376	0.593432	1.02948	0.00063066	0.00065885	0.00048709	0.00036137	0.000534492	39	41	27	16	30.75	0.00019202	0.00034517	0.00042895	0.00045083	0.000354243	10	12	10	4	9
KRT8	gi|372466572|ref|NP_001243211.1|:keratin, type II cytoskeletal 8 isoform 1 [Homo sapiens] ;gi|372466577|ref|NP_001243222.1|:keratin, type II cytoskeletal 8 isoform 2 [Homo sapiens] ;	1.5067	0.0664752	0.591393	1.17734	0.00121141	0.00136711	0.00128443	0.00115991	0.00125572	88.6137	100.632	84.2176	60.7479	83.5529	0.00097283	0.0010443	0.0010307	0.00028585	0.00083342	59.9287	42.9449	28.4228	3	33.5741
NAE1	gi|4502169|ref|NP_003896.1|:NEDD8-activating enzyme E1 regulatory subunit isoform a [Homo sapiens] ;gi|557357751|ref|NP_001273429.1|:NEDD8-activating enzyme E1 regulatory subunit isoform d [Homo sapiens] ;gi|66363686|ref|NP_001018169.1|:NEDD8-activating enzyme E1 regulatory subunit isoform b [Homo sapiens] ;	1.50617	0.165479	0.590887	0.781258	0.00049711	0.000715	0.00072972	0.00042024	0.000590518	38	55	50	23	41.5	0.00043495	0.00065156	0.00020821	0.00027354	0.000392065	28	28	6	3	16.25
PROSER2	PREDICTED: proline and serine-rich protein 2 isoform X1 [Homo sapiens]	1.5042	0.80526	0.588995	0.0940641	0	0	3.583e-05	0	3.583e-05	0	0	2	0	0.5	1.907e-05	2.857e-05	0	0	2.382e-05	1	1	0	0	0.5
DTL	gi|555943897|ref|NP_057532.3|:denticleless protein homolog isoform 1 [Homo sapiens] ;gi|555943901|ref|NP_001273159.1|:denticleless protein homolog isoform 3 [Homo sapiens] ;	1.50221	0.621675	0.587085	0.206436	0	7.608e-05	5.338e-05	1.337e-05	4.761e-05	0	8	5	1	3.5	1.136e-05	1.702e-05	0	6.67e-05	3.16933e-05	1	1	0	1	0.75
	gi|578832549|ref|XP_006722548.1|:PREDICTED: dymeclin isoform X1 [Homo sapiens] ;gi|578832551|ref|XP_006722549.1|:PREDICTED: dymeclin isoform X2 [Homo sapiens] ;gi|578832555|ref|XP_006722551.1|:PREDICTED: dymeclin isoform X4 [Homo sapiens] ;gi|578832557|ref|XP_006722552.1|:PREDICTED: dymeclin isoform X5 [Homo sapiens] ;gi|578832559|ref|XP_006722553.1|:PREDICTED: dymeclin isoform X6 [Homo sapiens] ;	1.50063	0.10548	0.585567	0.976829	0	3.113e-05	2.33e-05	2.917e-05	2.78667e-05	0	3	2	2	1.75	0	1.857e-05	0	0	1.857e-05	0	1	0	0	0.25
DERL1	gi|13236516|ref|NP_077271.1|:derlin-1 isoform a [Homo sapiens] ;gi|197927278|ref|NP_001128143.1|:derlin-1 isoform b [Homo sapiens] ;gi|578816175|ref|XP_006716720.1|:PREDICTED: derlin-1 isoform X1 [Homo sapiens] ;	1.49929	0.376807	0.584282	0.42388	0	5.531e-05	9.315e-05	0	7.423e-05	0	2	3	0	1.25	0	4.951e-05	0	0	4.951e-05	0	1	0	0	0.25
SEC61A1	protein transport protein Sec61 subunit alpha isoform 1 [Homo sapiens]	1.4971	0.170372	0.582175	0.768601	5.87e-05	0.00011667	0.00021285	4.1e-05	0.000107305	4	8	13	2	6.75	0	0.00010442	3.893e-05	0	7.1675e-05	0	4	1	0	1.25
	PREDICTED: actin-related protein 2/3 complex subunit 1B isoform X2 [Homo sapiens]	1.49407	0.139063	0.579252	0.856789	0.00013145	5.598e-05	0.0001257	5.246e-05	9.13975e-05	7	3	6	2	4.5	6.69e-05	6.681e-05	4.981e-05	0	6.11733e-05	3	2	1	0	1.5
NCLN	gi|51873031|ref|NP_064555.2|:nicalin precursor [Homo sapiens] ;gi|530425322|ref|XP_005259653.1|:PREDICTED: nicalin isoform X1 [Homo sapiens] ;	1.49235	0.462757	0.577583	0.334647	4.963e-05	0.0001233	0.00012458	8.665e-05	9.604e-05	4	10	9	5	7	2.947e-05	2.207e-05	3.291e-05	0.00017297	6.4355e-05	2	1	1	2	1.5
CDC37	hsp90 co-chaperone Cdc37 [Homo sapiens]	1.48936	0.0422411	0.574694	1.37427	5.544e-05	7.346e-05	6.185e-05	0.00010325	7.35e-05	3	4	3	4	3.5	6.583e-05	3.287e-05	0	0	4.935e-05	3	1	0	0	1
ACOT7	gi|32528282|ref|NP_863654.1|:cytosolic acyl coenzyme A thioester hydrolase isoform hBACHb [Homo sapiens] ;gi|32528286|ref|NP_863656.1|:cytosolic acyl coenzyme A thioester hydrolase isoform hBACHd [Homo sapiens] ;gi|75709208|ref|NP_009205.3|:cytosolic acyl coenzyme A thioester hydrolase isoform hBACHa [Homo sapiens] ;	1.48925	0.0797126	0.574582	1.09847	0.00018384	0.00016442	0.00020509	0.00025676	0.000202527	10	9	10	10	9.75	6.549e-05	0.0001962	0.00014629	0	0.000135993	3	6	3	0	3
KRT2	keratin, type II cytoskeletal 2 epidermal [Homo sapiens]	1.48653	0.247288	0.571947	0.606797	0.00082178	0.00057282	0.00126629	0.00058548	0.000811593	75.1703	52.7272	103.826	38.3443	67.517	0.00017525	0.00075331	0.00056953	0.00068577	0.000545965	13.5	38.7381	19.6396	9	20.2194
HSPA1A	heat shock 70 kDa protein 1A/1B [Homo sapiens]	1.48443	0.0340529	0.569912	1.46785	0.0133801	0.0100111	0.0100694	0.0113616	0.0112055	1227.74	924.392	828.194	746.421	931.686	0.0064717	0.0103478	0.0080175	0.00535787	0.00754871	500.093	533.789	277.339	70.5364	345.439
ETFA	gi|189181759|ref|NP_001121188.1|:electron transfer flavoprotein subunit alpha, mitochondrial isoform b [Homo sapiens] ;gi|4503607|ref|NP_000117.1|:electron transfer flavoprotein subunit alpha, mitochondrial isoform a [Homo sapiens] ;	1.48203	0.167262	0.567571	0.776602	4.92e-05	7.333e-05	0.00013721	0	8.658e-05	2	3	5	0	2.5	5.842e-05	0	0	0	5.842e-05	2	0	0	0	0.5
MCM5	gi|23510448|ref|NP_006730.2|:DNA replication licensing factor MCM5 [Homo sapiens] ;gi|578837205|ref|XP_006724305.1|:PREDICTED: DNA replication licensing factor MCM5 isoform X1 [Homo sapiens] ;	1.47304	0.226155	0.558797	0.645594	0.00077091	0.00048235	0.00041409	0.00031903	0.000496595	81	51	39	24	48.75	0.00048596	0.0002878	0.00017672	0.00039801	0.000337123	43	17	7	6	18.25
WDTC1	gi|22095349|ref|NP_055838.2|:WD and tetratricopeptide repeats protein 1 isoform b [Homo sapiens] ;gi|442565704|ref|NP_001263181.1|:WD and tetratricopeptide repeats protein 1 isoform a [Homo sapiens] ;	1.46509	0.138491	0.55099	0.858577	1.033e-05	2.054e-05	2.306e-05	0	1.79767e-05	1	2	2	0	1.25	1.227e-05	0	0	0	1.227e-05	1	0	0	0	0.25
DBNL	gi|21361670|ref|NP_054782.2|:drebrin-like protein isoform a [Homo sapiens] ;gi|62198235|ref|NP_001014436.1|:drebrin-like protein isoform b [Homo sapiens] ;	1.46326	0.00520549	0.549183	2.28354	0.0009887	0.00080534	0.00103068	0.0010187	0.000960855	61	50	57	45	53.25	0.00071211	0.00072077	0.00051593	0.00067781	0.000656655	37	25	12	6	20
SQSTM1	gi|214830451|ref|NP_001135771.1|:sequestosome-1 isoform 2 [Homo sapiens] ;gi|4505571|ref|NP_003891.1|:sequestosome-1 isoform 1 [Homo sapiens] ;	1.46025	0.0854802	0.546212	1.06813	1.962e-05	3.9e-05	0.00013135	8.222e-05	6.80475e-05	1	2	6	3	3	4.66e-05	0	0	0	4.66e-05	2	0	0	0	0.5
HSPB11	PREDICTED: intraflagellar transport protein 25 homolog isoform X1 [Homo sapiens]	1.45881	0.397226	0.544796	0.400962	0.00019405	4.821e-05	0.00032473	0	0.000188997	4	1	6	0	2.75	0.00017282	8.629e-05	0	0	0.000129555	3	1	0	0	1
TRAPPC5	trafficking protein particle complex subunit 5 [Homo sapiens]	1.45537	0.449265	0.541389	0.347498	3.716e-05	0.00036926	0.00020727	0.00025949	0.000218295	1	10	5	5	5.25	4.412e-05	0.00019829	9.857e-05	0.00025899	0.000149993	1	3	1	1	1.5
	PREDICTED: rho guanine nucleotide exchange factor 16 isoform X2 [Homo sapiens]	1.45472	0.395589	0.540739	0.402756	0.00010838	0.00024478	0.00025282	0.00011009	0.000179017	11	25	23	8	16.75	0.0001989	3.505e-05	5.227e-05	0.00020602	0.00012306	17	2	2	3	6
EIF4B	gi|50053795|ref|NP_001408.2|:eukaryotic translation initiation factor 4B [Homo sapiens] ;gi|530399910|ref|XP_005268766.1|:PREDICTED: eukaryotic translation initiation factor 4B isoform X1 [Homo sapiens] ;	1.4505	0.199955	0.536547	0.699067	0.0008918	0.00096575	0.00100766	0.00079844	0.000915913	78	85	79	50	73	0.00081458	0.00107788	0.00039426	0.00023907	0.000631447	60	53	13	3	32.25
NUP107	nuclear pore complex protein Nup107 [Homo sapiens]	1.4476	0.0431011	0.533662	1.36551	0.00023412	0.00024016	0.00015166	0.00012658	0.00018813	31	32	18	12	23.25	0.00015245	0.00010747	0	0	0.00012996	17	8	0	0	6.25
DIAPH1	protein diaphanous homolog 1 isoform 1 [Homo sapiens]	1.44668	0.113581	0.532743	0.944694	0.0002691	0.0003984	0.0003186	0.00027614	0.00031556	49	73	52	36	52.5	0.00022825	0.00031261	0.00010198	0.00022967	0.000218127	35	32	7	6	20
KIF1A	gi|345842524|ref|NP_001230937.1|:kinesin-like protein KIF1A isoform 1 [Homo sapiens] ;gi|530371611|ref|XP_005247079.1|:PREDICTED: kinesin-like protein KIF1A isoform X1 [Homo sapiens] ;gi|530371613|ref|XP_005247080.1|:PREDICTED: kinesin-like protein KIF1A isoform X2 [Homo sapiens] ;gi|530371615|ref|XP_005247081.1|:PREDICTED: kinesin-like protein KIF1A isoform X3 [Homo sapiens] ;gi|530371619|ref|XP…	1.44473	0.123857	0.530797	0.90708	5.2e-06	2.713e-05	2.9e-06	2.724e-05	1.56175e-05	1.33333	7	0.666667	5	3.5	1.081e-05	0	0	0	1.081e-05	2.33333	0	0	0	0.583333
EPPK1	epiplakin [Homo sapiens]	1.44396	0.00777051	0.530032	2.10955	0.0008284	0.00085241	0.00078107	0.00077759	0.000809867	603.355	624.759	509.925	405.496	535.884	0.00053426	0.00070858	0.0005853	0.00041532	0.000560865	327.699	290.136	160.708	43.4	205.486
	gi|578817255|ref|XP_006717094.1|:PREDICTED: rab GTPase-activating protein 1 isoform X4 [Homo sapiens] ;gi|578817257|ref|XP_006717095.1|:PREDICTED: rab GTPase-activating protein 1 isoform X5 [Homo sapiens] ;	1.4421	0.529104	0.528176	0.276459	5.881e-05	6.494e-05	4.812e-05	0	5.729e-05	9	10	6.6	0	6.4	1.552e-05	5.166e-05	5.2e-05	0	3.97267e-05	2	4.44444	3	0	2.36111
	PREDICTED: THUMP domain-containing protein 3 isoform X5 [Homo sapiens]	1.43553	0.0778036	0.521586	1.109	4.134e-05	8.215e-05	7.686e-05	5.773e-05	6.452e-05	3	6	5	3	4.25	1.636e-05	7.353e-05	0	0	4.4945e-05	1	3	0	0	1
C1orf86	gi|123701942|ref|NP_872339.2|:Fanconi anemia-associated protein of 20 kDa isoform 2 [Homo sapiens] ;gi|379643017|ref|NP_001243875.1|:Fanconi anemia-associated protein of 20 kDa isoform 4 [Homo sapiens] ;gi|544063491|ref|NP_001269599.1|:Fanconi anemia-associated protein of 20 kDa isoform 6 [Homo sapiens] ;gi|544063497|ref|NP_001269602.1|:Fanconi anemia-associated protein of 20 kDa isoform 8 [Homo …	1.43508	0.0617539	0.521131	1.20934	0.00015524	0.00015427	0.00012989	5.421e-05	0.000123403	4	4	3	1	3	0	6.903e-05	0.00010295	0	8.599e-05	0	1	1	0	0.5
ARF4	ADP-ribosylation factor 4 [Homo sapiens]	1.43451	0.0174644	0.520555	1.75785	0.00027764	0.00030571	0.00051956	0.00024392	0.000336707	7.15385	7.92683	12	4.5	7.89517	0	0.00023472	0	0	0.00023472	0	3.4	0	0	0.85
GNAS	gi|117938759|ref|NP_536350.2|:protein GNAS isoform XLas [Homo sapiens] ;gi|117938762|ref|NP_001070956.1|:protein GNAS isoform f [Homo sapiens] ;gi|4504047|ref|NP_000507.1|:protein GNAS isoform GNASL [Homo sapiens] ;gi|578835965|ref|XP_006723844.1|:PREDICTED: protein ALEX isoform X8 [Homo sapiens] ;	1.43414	0.191265	0.520189	0.718365	0.00010105	4.686e-05	3.758e-05	9.41e-06	4.8725e-05	15	7	5	1	7	3.2e-05	3.595e-05	0	0	3.3975e-05	4	3	0	0	1.75
MRPL3	39S ribosomal protein L3, mitochondrial [Homo sapiens]	1.434	0.206909	0.52005	0.68422	6.022e-05	1.995e-05	2.239e-05	0	3.41867e-05	3	1	1	0	1.25	2.384e-05	0	0	0	2.384e-05	1	0	0	0	0.25
USO1	gi|4505541|ref|NP_003706.1|:general vesicular transport factor p115 [Homo sapiens] ;gi|578809576|ref|XP_006714458.1|:PREDICTED: general vesicular transport factor p115 isoform X1 [Homo sapiens] ;gi|578809578|ref|XP_006714459.1|:PREDICTED: general vesicular transport factor p115 isoform X2 [Homo sapiens] ;gi|578809580|ref|XP_006714460.1|:PREDICTED: general vesicular transport factor p115 isoform X…	1.43382	0.206955	0.51986	0.684123	4.357e-05	1.443e-05	1.62e-05	0	2.47333e-05	6	2	2	0	2.5	1.725e-05	0	0	0	1.725e-05	2	0	0	0	0.5
RHEB	gi|5032041|ref|NP_005605.1|:GTP-binding protein Rheb [Homo sapiens] ;gi|578814489|ref|XP_006716144.1|:PREDICTED: GTP-binding protein Rheb isoform X1 [Homo sapiens] ;	1.43289	0.11659	0.518931	0.933338	0.00026576	0.0002641	0.00016942	0.00015908	0.00021459	7	7	4	3	5.25	0.00018033	6.753e-05	0.00020142	0	0.00014976	4	1	2	0	1.75
SPAST	gi|11875211|ref|NP_055761.2|:spastin isoform 1 [Homo sapiens] ;gi|40806170|ref|NP_955468.1|:spastin isoform 2 [Homo sapiens] ;gi|530368010|ref|XP_005264573.1|:PREDICTED: spastin isoform X1 [Homo sapiens] ;	1.43034	0.205868	0.516357	0.686411	1.134e-05	3.381e-05	1.265e-05	0	1.92667e-05	1	3	1	0	1.25	1.347e-05	0	0	0	1.347e-05	1	0	0	0	0.25
ABCB7	gi|411147363|ref|NP_001258625.1|:ATP-binding cassette sub-family B member 7, mitochondrial isoform 2 [Homo sapiens] ;gi|411147367|ref|NP_001258627.1|:ATP-binding cassette sub-family B member 7, mitochondrial isoform 4 [Homo sapiens] ;gi|42490749|ref|NP_004290.2|:ATP-binding cassette sub-family B member 7, mitochondrial isoform 1 [Homo sapiens] ;	1.4295	0.222091	0.515513	0.653469	0.00013934	0.00018463	9.327e-05	0.00016867	0.000146478	15	20	9	13	14.25	3.309e-05	0.00014872	9.857e-05	0.00012949	0.000102468	3	9	4	2	4.5
FDXR	gi|111118981|ref|NP_077728.2|:NADPH:adrenodoxin oxidoreductase, mitochondrial isoform 1 precursor [Homo sapiens] ;gi|111118983|ref|NP_004101.2|:NADPH:adrenodoxin oxidoreductase, mitochondrial isoform 2 precursor [Homo sapiens] ;gi|384381462|ref|NP_001244941.1|:NADPH:adrenodoxin oxidoreductase, mitochondrial isoform 3 precursor [Homo sapiens] ;gi|384381464|ref|NP_001244942.1|:NADPH:adrenodoxin oxi…	1.42251	0.6929	0.508441	0.159329	0	2.828e-05	3.175e-05	0	3.0015e-05	0	2	2	0	1	1.689e-05	2.531e-05	0	0	2.11e-05	1	1	0	0	0.5
	gi|578839385|ref|XP_006725045.1|:PREDICTED: centrosomal protein of 170 kDa isoform X9 [Homo sapiens] ;gi|578839389|ref|XP_006725047.1|:PREDICTED: centrosomal protein of 170 kDa isoform X11 [Homo sapiens] ;	1.41821	0.122578	0.50407	0.911589	1.435e-05	7.13e-06	1.068e-05	6.68e-06	9.71e-06	3	1.5	2	1	1.875	5.68e-06	8.51e-06	6.35e-06	0	6.84667e-06	1	1	0.5	0	0.625
HIST2H2AA4	gi|106775678|ref|NP_001035807.1|:histone H2A type 2-A [Homo sapiens] ;gi|24638446|ref|NP_003508.1|:histone H2A type 2-C [Homo sapiens] ;	1.41314	0.35488	0.498902	0.449919	8.06e-05	0.0001335	0.00051956	0.00075053	0.000371047	1.5	2.5	8.66667	10	5.66667	0.00028714	0.00028676	0.00021381	0	0.00026257	4.5	3	1.5	0	2.25
RPS7	40S ribosomal protein S7 [Homo sapiens]	1.41162	0.0704965	0.497351	1.15183	0.00381695	0.00246907	0.00301292	0.00261525	0.00297855	106	69	75	52	75.5	0.00256552	0.00243398	0.00143277	0.00200782	0.00211002	60	38	15	8	30.25
RIOK2	serine/threonine-protein kinase RIO2 isoform 1 [Homo sapiens]	1.41151	0.12602	0.497235	0.899561	0.00015186	8.803e-05	0.00011295	0.00010605	0.000114722	12	7	8	6	8.25	0.00012022	9.004e-05	3.357e-05	0	8.12767e-05	8	4	1	0	3.25
TPD52L2	gi|40805862|ref|NP_955391.1|:tumor protein D54 isoform f [Homo sapiens] ;gi|40805866|ref|NP_955393.1|:tumor protein D54 isoform b [Homo sapiens] ;gi|40805870|ref|NP_955395.1|:tumor protein D54 isoform d [Homo sapiens] ;	1.41108	0.940786	0.496798	0.0265091	0.00107039	0	0	0.00081308	0.000941735	28.5	0	0	15.5	11	0.00124874	0.00036076	0	0.00039266	0.000667387	28	5.4	0	1.5	8.725
DNAJC11	dnaJ homolog subfamily C member 11 [Homo sapiens]	1.41045	0.0905853	0.496151	1.04294	0.00044989	0.00037256	0.00030672	0.00029672	0.000356472	36	30	22	17	26.25	0.00025227	0.00024452	0.00016575	0.00034841	0.000252738	17	11	5	4	9.25
FMR1	gi|297374779|ref|NP_001172005.1|:fragile X mental retardation protein 1 isoform ISO7 [Homo sapiens] ;gi|297374791|ref|NP_001172011.1|:fragile X mental retardation protein 1 isoform ISO9 [Homo sapiens] ;gi|4503765|ref|NP_002015.1|:fragile X mental retardation protein 1 isoform ISO1 [Homo sapiens] ;	1.40644	0.355779	0.492044	0.44882	0	3.246e-05	4.373e-05	7.984e-05	5.201e-05	0	2.85714	3.42857	5	2.82143	5.159e-05	2.237e-05	0	0	3.698e-05	3.8	1.1	0	0	1.225
WIBG	gi|14150139|ref|NP_115721.1|:partner of Y14 and mago isoform 1 [Homo sapiens] ;gi|219803946|ref|NP_001137325.1|:partner of Y14 and mago isoform 2 [Homo sapiens] ;	1.40239	0.309653	0.487892	0.509124	6.849e-05	0.00013612	0.00011461	0	0.000106407	2	4	3	0	2.25	0	6.091e-05	9.084e-05	0	7.5875e-05	0	1	1	0	0.5
CNN2	calponin-2 isoform a [Homo sapiens]	1.40238	0.15809	0.487874	0.801095	0.00011304	0.00031968	0.00028624	0.00016306	0.000220505	5	14.2295	11.3492	5.16393	8.93566	0.00013423	0	0.00017991	0.00015757	0.000157237	5	0	3	1	2.25
TIMM23	mitochondrial import inner membrane translocase subunit Tim23 [Homo sapiens]	1.40002	0.0905177	0.485447	1.04327	0.00030082	0.00033215	0.00044747	0.00032679	0.000351807	9	10	12	7	9.5	0.00023814	0.00035673	0.00017732	0.00023296	0.000251288	6	6	2	1	3.75
ARFGAP3	gi|214829673|ref|NP_055385.3|:ADP-ribosylation factor GTPase-activating protein 3 isoform 1 [Homo sapiens] ;gi|214829714|ref|NP_001135765.1|:ADP-ribosylation factor GTPase-activating protein 3 isoform 2 [Homo sapiens] ;gi|530419919|ref|XP_005261582.1|:PREDICTED: ADP-ribosylation factor GTPase-activating protein 3 isoform X1 [Homo sapiens] ;	1.39964	0.399977	0.485056	0.397965	0	0	6.343e-05	3.782e-05	5.0625e-05	0	0	4.2	2	1.55	3.617e-05	0	0	0	3.617e-05	2.25	0	0	0	0.5625
FAM117B	protein FAM117B [Homo sapiens]	1.39802	0.458854	0.483387	0.338325	7.116e-05	9.429e-05	0.0002514	0.00016565	0.000145625	6	8	19	10	10.75	0.00011267	0.00018987	3.146e-05	8.266e-05	0.000104165	8	9	1	1	4.75
PYCRL	gi|198041662|ref|NP_075566.2|:pyrroline-5-carboxylate reductase 3 [Homo sapiens] ;gi|578839732|ref|XP_006725155.1|:PREDICTED: pyrroline-5-carboxylate reductase 3 isoform X1 [Homo sapiens] ;	1.39683	0.124394	0.482155	0.905202	0.00036638	0.00033982	0.00051774	0.00030704	0.000382745	15	14	19	9	14.25	0.00031905	0.00034758	0.00025917	0.00017024	0.00027401	11	8	4	1	6
BCKDHB	gi|34101272|ref|NP_898871.1|:2-oxoisovalerate dehydrogenase subunit beta, mitochondrial precursor [Homo sapiens] ;gi|578812909|ref|XP_006715605.1|:PREDICTED: 2-oxoisovalerate dehydrogenase subunit beta, mitochondrial isoform X2 [Homo sapiens] ;	1.3948	0.284068	0.480057	0.546577	0	5.313e-05	5.964e-05	7.467e-05	6.248e-05	0	3	3	3	2.25	4.232e-05	0	4.727e-05	0	4.4795e-05	2	0	1	0	0.75
TTC1	tetratricopeptide repeat protein 1 [Homo sapiens]	1.39007	0.182948	0.475156	0.737672	0.00019139	0.00026151	0.00029359	0.00040097	0.000286865	8	11	11	12	10.5	0.00017045	0.00029789	0.00019038	0.00016675	0.000206368	6	7	3	1	4.25
EIF3K	gi|10801345|ref|NP_037366.1|:eukaryotic translation initiation factor 3 subunit K [Homo sapiens] ;gi|578834291|ref|XP_006723210.1|:PREDICTED: eukaryotic translation initiation factor 3 subunit K isoform X1 [Homo sapiens] ;	1.38953	0.210953	0.474599	0.675814	0	3.184e-05	7.15e-05	0.00013427	7.92033e-05	0	1	2	3	1.5	0	5.7e-05	0	0	5.7e-05	0	1	0	0	0.25
TIMM50	mitochondrial import inner membrane translocase subunit TIM50 [Homo sapiens]	1.38384	0.306782	0.46868	0.51317	0.00058214	0.00039582	0.00032473	0.00042793	0.000432655	38	26	19	20	25.75	0.00054574	0.00035425	0.00024382	0.00010678	0.000312648	30	13	6	1	12.5
USP19	gi|312596873|ref|NP_001186090.1|:ubiquitin carboxyl-terminal hydrolase 19 isoform 2 [Homo sapiens] ;gi|312596875|ref|NP_001186091.1|:ubiquitin carboxyl-terminal hydrolase 19 isoform 3 [Homo sapiens] ;gi|530371807|ref|XP_005264886.1|:PREDICTED: ubiquitin carboxyl-terminal hydrolase 19 isoform X7 [Homo sapiens] ;gi|530371811|ref|XP_005264888.1|:PREDICTED: ubiquitin carboxyl-terminal hydrolase 19 is…	1.37923	0.107191	0.463859	0.96984	2.019e-05	7.524e-05	6.757e-05	3.525e-05	4.95625e-05	4	15	12	5	9	3.596e-05	3.591e-05	0	0	3.5935e-05	6	4	0	0	2.5
GNB2	guanine nucleotide-binding protein G(I)/G(S)/G(T) subunit beta-2 [Homo sapiens]	1.37727	0.602671	0.461813	0.21992	0	6.125e-05	6.877e-05	0.00011479	8.16033e-05	0	3	3	4	2.5	2.44e-05	0	8.175e-05	7.16e-05	5.925e-05	1	0	1.5	0.5	0.75
LMNA	gi|27436946|ref|NP_733821.1|:lamin isoform A [Homo sapiens] ;gi|27436948|ref|NP_733822.1|:lamin isoform A-delta10 [Homo sapiens] ;gi|383792150|ref|NP_001244303.1|:lamin isoform D [Homo sapiens] ;gi|544063464|ref|NP_001269553.1|:lamin isoform E [Homo sapiens] ;gi|544063466|ref|NP_001269554.1|:lamin isoform C [Homo sapiens] ;gi|544063468|ref|NP_001269555.1|:lamin isoform A-delta50 [Homo sapiens] ;	1.3744	0.18782	0.4588	0.726257	5.26e-05	9.409e-05	0.00011737	4.408e-05	7.7035e-05	5	9	10	3	6.75	3.748e-05	7.486e-05	5.581e-05	0	5.605e-05	3	4	2	0	2.25
HIGD1A	gi|153085461|ref|NP_001093138.1|:HIG1 domain family member 1A, mitochondrial isoform a [Homo sapiens] ;gi|153085470|ref|NP_001093139.1|:HIG1 domain family member 1A, mitochondrial isoform b [Homo sapiens] ;	1.37347	0.036955	0.457821	1.43233	0.00110988	0.00110294	0.00138388	0.00136779	0.00124112	17	17	19	15	17	0.0006202	0.00104519	0.00103909	0.00091009	0.000903643	8	9	6	2	6.25
EEF1A2	elongation factor 1-alpha 2 [Homo sapiens]	1.37272	0.258225	0.457042	0.588002	0.00082132	0.00022004	0.00046699	0.00030846	0.000454202	54.4355	14.6759	27.7436	14.6377	27.8732	0.00025193	0.00026043	0.00048027	0	0.000330877	14.0615	9.7037	12	0	8.94131
UQCRFS1	cytochrome b-c1 complex subunit Rieske, mitochondrial [Homo sapiens]	1.36969	0.231683	0.453851	0.635107	0.00033144	0.00012668	5.689e-05	0.00010683	0.00015546	13	5	2	3	5.75	0.00018165	4.535e-05	0	0	0.0001135	6	1	0	0	1.75
RPS15	40S ribosomal protein S15 [Homo sapiens]	1.36709	0.0517121	0.451109	1.28641	9.635e-05	0.00028726	0.0001075	0.00013458	0.000156423	2	6	2	2	3	0.00011442	0	0	0	0.00011442	2	0	0	0	0.5
CASKIN2	gi|217416347|ref|NP_065804.2|:caskin-2 isoform a [Homo sapiens] ;gi|217416350|ref|NP_001136115.1|:caskin-2 isoform b [Homo sapiens] ;	1.3587	0.433372	0.442222	0.363139	0	5.78e-06	1.297e-05	0	9.375e-06	0	1	2	0	0.75	6.9e-06	0	0	0	6.9e-06	1	0	0	0	0.25
ATP5F1	gi|21361565|ref|NP_001679.2|:ATP synthase F(0) complex subunit B1, mitochondrial precursor [Homo sapiens] ;gi|530362759|ref|XP_005270986.1|:PREDICTED: ATP synthase F(0) complex subunit B1, mitochondrial isoform X1 [Homo sapiens] ;	1.35818	0.433555	0.441674	0.362955	0	2.712e-05	6.089e-05	0	4.4005e-05	0	1	2	0	0.75	3.24e-05	0	0	0	3.24e-05	1	0	0	0	0.25
CTTNBP2NL	gi|24308179|ref|NP_061174.1|:CTTNBP2 N-terminal-like protein [Homo sapiens] ;gi|578799461|ref|XP_006710833.1|:PREDICTED: CTTNBP2 N-terminal-like protein isoform X2 [Homo sapiens] ;	1.35428	0.22054	0.437521	0.656512	7.653e-05	0.00010864	0.00018294	0.00015269	0.0001302	7	10	15	10	10.5	0.00010385	0.00015557	2.9e-05	0	9.614e-05	8	8	1	0	4.25
ABI1	gi|296010983|ref|NP_001171587.1|:abl interactor 1 isoform e [Homo sapiens] ;gi|296010990|ref|NP_001171590.1|:abl interactor 1 isoform f [Homo sapiens] ;gi|296010993|ref|NP_001171591.1|:abl interactor 1 isoform g [Homo sapiens] ;gi|296010995|ref|NP_001171592.1|:abl interactor 1 isoform h [Homo sapiens] ;gi|530391913|ref|XP_005252389.1|:PREDICTED: abl interactor 1 isoform X2 [Homo sapiens] ;gi|5303…	1.35381	0.328567	0.437028	0.483376	0.00016901	0.00023793	0.00031425	0.00023605	0.00023931	12	17	20	12	15.25	0.00013379	0.00032568	0.00014944	9.816e-05	0.000176768	8	13	4	1	6.5
SLC25A1	gi|21389315|ref|NP_005975.1|:tricarboxylate transport protein, mitochondrial isoform a precursor [Homo sapiens] ;gi|374717343|ref|NP_001243463.1|:tricarboxylate transport protein, mitochondrial isoform b [Homo sapiens] ;	1.35194	0.422825	0.435034	0.373839	0.00015724	0.00020089	0.00025059	0.00047059	0.000269827	7	9	10	15	10.25	0.00010669	0.00019978	0.00017875	0.00031312	0.000199585	4	5	3	2	3.5
MAP2K1	gi|5579478|ref|NP_002746.1|:dual specificity mitogen-activated protein kinase kinase 1 [Homo sapiens] ;gi|578827195|ref|XP_006720671.1|:PREDICTED: dual specificity mitogen-activated protein kinase kinase 1 isoform X3 [Homo sapiens] ;	1.35075	0.182104	0.433757	0.73968	0.00018821	0.00013984	0.00013485	8.689e-05	0.000137447	10.5882	7.91667	6.8	3.5	7.20123	7.469e-05	0.00016863	0	6.195e-05	0.000101757	3.53846	5.33333	0	0.5	2.34295
RPS27A	ubiquitin-40S ribosomal protein S27a precursor [Homo sapiens]	1.34894	0.393815	0.431827	0.404708	0.00429891	0.001869	0.00239797	0.00318976	0.00293891	96	42	48	51	59.25	0.00346518	0.00302687	0.00144239	0.00078028	0.00217868	65.1667	38	12.1429	2.5	29.4524
LASP1	LIM and SH3 domain protein 1 isoform a [Homo sapiens]	1.34674	0.983101	0.42947	0.00740193	0	0.00023938	0.00011944	0.00014953	0.00016945	0	9	4	4	4.25	0.00012713	4.761e-05	0.000142	0.00018655	0.000125822	4	1	2	1	2
COTL1	coactosin-like protein [Homo sapiens]	1.34531	0.510634	0.427939	0.29189	0.00049195	0.00024444	0.00043907	6.871e-05	0.000311042	10	5	8	1	6	5.842e-05	0.00026252	0.00026099	0.00034289	0.000231205	1	3	2	1	1.75
HLCS	gi|530418853|ref|XP_005261010.1|:PREDICTED: biotin--protein ligase isoform X1 [Homo sapiens] ;gi|578836517|ref|XP_006724056.1|:PREDICTED: biotin--protein ligase isoform X5 [Homo sapiens] ;gi|578836525|ref|XP_006724059.1|:PREDICTED: biotin--protein ligase isoform X8 [Homo sapiens] ;	1.34123	0.0159271	0.423551	1.79786	0.00071218	0.00073157	0.00058027	0.00056999	0.000648502	89	92	65	51	74.25	0.0004751	0.00045548	0.00044575	0.00055773	0.000483515	50	32	21	10	28.25
SLC7A5	large neutral amino acids transporter small subunit 1 [Homo sapiens]	1.33951	0.0418871	0.421702	1.37792	4.134e-05	2.738e-05	4.611e-05	3.849e-05	3.833e-05	3	2	3	2	2.5	3.272e-05	2.451e-05	0	0	2.8615e-05	2	1	0	0	0.75
TWF2	twinfilin-2 [Homo sapiens]	1.33933	0.109921	0.421517	0.95892	0.00078064	0.00047739	0.00051361	0.00050322	0.000568715	39	24	23	18	26	0.00049914	0.00035605	0.00042477	0.00041854	0.000424625	21	10	8	3	10.5
PHB	prohibitin isoform 1 [Homo sapiens]	1.33775	0.385642	0.41981	0.413816	0.00095027	0.00058701	0.00146127	0.00068155	0.000920025	37	23	51	19	32.5	0.00057944	0.00036547	0.00109003	0.00071602	0.00068774	19	8	16	4	11.75
RPN1	dolichyl-diphosphooligosaccharide--protein glycosyltransferase subunit 1 precursor [Homo sapiens]	1.33416	0.0423132	0.415935	1.37352	0.00055241	0.00050321	0.00052641	0.00065903	0.000560265	48	44	41	41	43.5	0.00045097	0.00038896	0.00051897	0.00032085	0.000419938	33	19	17	4	18.25
SEPT2	gi|545478466|ref|NP_001269901.1|:septin-2 isoform b [Homo sapiens] ;gi|545478822|ref|NP_001269902.1|:septin-2 isoform c [Homo sapiens] ;gi|578804378|ref|XP_006712609.1|:PREDICTED: septin-2 isoform X6 [Homo sapiens] ;gi|578804380|ref|XP_006712610.1|:PREDICTED: septin-2 isoform X7 [Homo sapiens] ;gi|578804384|ref|XP_006712612.1|:PREDICTED: septin-2 isoform X9 [Homo sapiens] ;	1.32689	0.156836	0.408045	0.804555	0.00077619	0.00082393	0.00080689	0.00064061	0.000761905	44	47	41	26	39.5	0.00087979	0.00053344	0.00051473	0.00036886	0.000574205	42	17	11	3	18.25
BAIAP2L1	brain-specific angiogenesis inhibitor 1-associated protein 2-like protein 1 [Homo sapiens]	1.32614	0.428127	0.407231	0.368427	1.367e-05	5.434e-05	6.101e-05	0	4.30067e-05	1	4	4	0	2.25	1.623e-05	4.863e-05	0	0	3.243e-05	1	2	0	0	0.75
CNN3	calponin-3 isoform 1 [Homo sapiens]	1.32557	0.28059	0.406614	0.551928	0.00065823	0.00100797	0.00127089	0.0017152	0.00116307	31	47.7705	53.6508	57.8361	47.5643	0.0007564	0.00113308	0.00073221	0.00088796	0.000877413	30	30	13	6	19.75
GOLGA4	gi|289577134|ref|NP_001166184.1|:Golgin subfamily A member 4 isoform 1 [Homo sapiens] ;gi|530372318|ref|XP_005265126.1|:PREDICTED: Golgin subfamily A member 4 isoform X1 [Homo sapiens] ;gi|530372320|ref|XP_005265127.1|:PREDICTED: Golgin subfamily A member 4 isoform X2 [Homo sapiens] ;gi|530372322|ref|XP_005265128.1|:PREDICTED: Golgin subfamily A member 4 isoform X3 [Homo sapiens] ;gi|530372324|re…	1.32535	0.17652	0.406371	0.753205	1.557e-05	2.476e-05	4.517e-05	1.74e-05	2.5725e-05	5	8	13	4	7.5	3.328e-05	5.54e-06	0	0	1.941e-05	9	1	0	0	2.5
NPEPPS	puromycin-sensitive aminopeptidase [Homo sapiens]	1.3249	0.332621	0.405879	0.47805	0.00021284	0.00024172	0.00019505	0.00018049	0.000207525	28	32	23	17	25	0.00027079	0.0001893	6.049e-05	0.00010596	0.000156635	30	14	3	2	12.25
SLC25A12	gi|21361103|ref|NP_003696.2|:calcium-binding mitochondrial carrier protein Aralar1 [Homo sapiens] ;gi|530371103|ref|XP_005246980.1|:PREDICTED: calcium-binding mitochondrial carrier protein Aralar1 isoform X1 [Homo sapiens] ;	1.32425	0.640491	0.405174	0.193487	4.324e-05	4.818e-05	0	7.427e-05	5.523e-05	4.19672	4.70588	0	5.16129	3.51597	6.539e-05	2.215e-05	3.758e-05	0	4.17067e-05	5.34483	1.20833	1.375	0	1.98204
GNB1	guanine nucleotide-binding protein G(I)/G(S)/G(T) subunit beta-1 isoform 1 [Homo sapiens]	1.32033	0.982459	0.400898	0.0076855	8.219e-05	6.125e-05	6.877e-05	0	7.07367e-05	4	3	3	0	2.5	2.44e-05	3.655e-05	8.175e-05	7.16e-05	5.3575e-05	1	1	1.5	0.5	1
TOMM34	mitochondrial import receptor subunit TOM34 [Homo sapiens]	1.32013	0.275444	0.400681	0.559966	0	2.247e-05	0.00020177	9.473e-05	0.000106323	0	1	8	3	3	8.054e-05	0	0	0	8.054e-05	3	0	0	0	0.75
HNRNPH1	gi|381342476|ref|NP_001244222.1|:heterogeneous nuclear ribonucleoprotein H [Homo sapiens] ;gi|530381017|ref|XP_005265953.1|:PREDICTED: heterogeneous nuclear ribonucleoprotein H isoform X2 [Homo sapiens] ;	1.31886	0.426181	0.399295	0.370405	0.00062011	0.00040976	0.00049011	0.00018316	0.000425785	39.8571	26.5027	28.2364	8.42857	25.7562	0.00030658	0.00045745	0.0004189	0.00010844	0.000322843	16.5946	16.5292	10.15	1	11.0684
MON2	gi|114326552|ref|NP_055841.2|:protein MON2 homolog isoform 1 [Homo sapiens] ;gi|510937035|ref|NP_001265398.1|:protein MON2 homolog isoform 2 [Homo sapiens] ;gi|510937037|ref|NP_001265399.1|:protein MON2 homolog isoform 3 [Homo sapiens] ;gi|510937039|ref|NP_001265400.1|:protein MON2 homolog isoform 4 [Homo sapiens] ;gi|510937041|ref|NP_001265401.1|:protein MON2 homolog isoform 5 [Homo sapiens] ;gi…	1.31666	0.528161	0.396881	0.277233	8.137e-05	4.043e-05	4.539e-05	1.705e-05	4.606e-05	20	10	10	3	10.75	4.348e-05	2.895e-05	1.079e-05	5.671e-05	3.49825e-05	9	4	1	2	4
FAM111B	protein FAM111B isoform a [Homo sapiens]	1.313	0.161009	0.392871	0.793151	3.807e-05	1.892e-05	4.247e-05	0	3.31533e-05	4	2	4	0	2.5	0	0	2.525e-05	0	2.525e-05	0	0	1	0	0.25
GFPT1	gi|205277386|ref|NP_002047.2|:glutamine--fructose-6-phosphate aminotransferase [isomerizing] 1 isoform 2 [Homo sapiens] ;gi|347659028|ref|NP_001231639.1|:glutamine--fructose-6-phosphate aminotransferase [isomerizing] 1 isoform 1 [Homo sapiens] ;	1.31237	0.273562	0.392169	0.562944	0.00026671	0.0003364	0.0002861	0.00022924	0.000279612	26	33	25	16	25	0.00012181	0.00018247	0.00019047	0.00035749	0.00021306	10	10	7	5	8
TXLNG	gamma-taxilin isoform 1 [Homo sapiens]	1.30993	0.20167	0.389491	0.695358	0.00026461	0.0003024	0.00033949	0.00027718	0.00029592	20	23	23	15	20.25	0.00015711	0.00032948	0.00014038	0.00027665	0.000225905	10	14	4	3	7.75
CLPTM1	gi|4502897|ref|NP_001285.1|:cleft lip and palate transmembrane protein 1 isoform 2 [Homo sapiens] ;gi|532164704|ref|NP_001269104.1|:cleft lip and palate transmembrane protein 1 isoform 3 [Homo sapiens] ;gi|532164706|ref|NP_001269105.1|:cleft lip and palate transmembrane protein 1 isoform 4 [Homo sapiens] ;	1.30954	0.188431	0.389059	0.724848	0.00010442	4.151e-05	3.495e-05	2.917e-05	5.25125e-05	10	4	3	2	4.75	2.48e-05	0	5.54e-05	0	4.01e-05	2	0	2	0	1
TANC2	gi|530411879|ref|XP_005257258.1|:PREDICTED: protein TANC2 isoform X1 [Homo sapiens] ;gi|530411883|ref|XP_005257260.1|:PREDICTED: protein TANC2 isoform X3 [Homo sapiens] ;gi|578830685|ref|XP_006721869.1|:PREDICTED: protein TANC2 isoform X4 [Homo sapiens] ;gi|578830687|ref|XP_006721870.1|:PREDICTED: protein TANC2 isoform X5 [Homo sapiens] ;gi|578830689|ref|XP_006721871.1|:PREDICTED: protein TANC2 i…	1.30735	0.863016	0.386646	0.0639809	0	6.94e-06	1.559e-05	0	1.1265e-05	0	2	4	0	1.5	4.15e-06	1.243e-05	9.27e-06	0	8.61667e-06	1	2	1	0	1
RBM14	RNA-binding protein 14 isoform 1 [Homo sapiens]	1.30718	0.156565	0.386459	0.805306	0.0005952	0.00054996	0.00071061	0.00067088	0.000631663	57	53	61	46	54.25	0.00028519	0.00044578	0.00069247	0.00050946	0.000483225	23	24	25	7	19.75
PRMT3	protein arginine N-methyltransferase 3 isoform 1 [Homo sapiens]	1.30698	0.429848	0.386235	0.366685	0	2.615e-05	1.468e-05	0	2.0415e-05	0	2	1	0	0.75	1.562e-05	0	0	0	1.562e-05	1	0	0	0	0.25
RAB14	ras-related protein Rab-14 [Homo sapiens]	1.30677	0.429919	0.386	0.366613	0	6.458e-05	3.625e-05	0	5.0415e-05	0	2	1	0	0.75	3.858e-05	0	0	0	3.858e-05	1	0	0	0	0.25
TUBB4B	tubulin beta-4B chain [Homo sapiens]	1.3058	0.18728	0.384933	0.727508	0.00064861	0.00056524	0.00051067	0.0006834	0.00060198	41.3173	36.2331	29.1589	31.169	34.4696	0.0006	0.00039001	0.00025019	0.00060382	0.000461005	32.1873	13.9668	6.0082	5.51858	14.4202
RAB1B	ras-related protein Rab-1B [Homo sapiens]	1.30494	0.0227934	0.383987	1.64219	6.951e-05	0.00013815	7.755e-05	0.00014563	0.00010771	2	4	2	3	2.75	8.254e-05	0	0	0	8.254e-05	2	0	0	0	0.5
ATAD3B	ATPase family AAA domain-containing protein 3B [Homo sapiens]	1.30346	0.792457	0.382342	0.101024	5.88e-05	1.813e-05	0	0	3.8465e-05	5.45455	1.69231	0	0	1.78671	3.026e-05	2.876e-05	0	0	2.951e-05	2.36364	1.5	0	0	0.965909
	PREDICTED: pyruvate kinase PKM isoform X4 [Homo sapiens]	1.30266	0.133908	0.381461	0.873194	0.00553511	0.003483	0.00331832	0.00466934	0.00425144	479.368	303.545	257.6	289.533	332.512	0.00389393	0.00312372	0.00281785	0.00321915	0.00326366	284	152.087	92	40	142.022
KRT6C	keratin, type II cytoskeletal 6C [Homo sapiens]	1.30258	0.983089	0.381369	0.00740729	0	0.00018074	1.244e-05	0.00039975	0.000197643	0	14.6845	0.9	23.1078	9.67308	3.68e-06	2.534e-05	0.00053475	4.316e-05	0.000151732	0.25	1.15	16.276	0.5	4.544
ITPK1	gi|217272844|ref|NP_001136065.1|:inositol-tetrakisphosphate 1-kinase isoform a [Homo sapiens] ;gi|217272846|ref|NP_001136066.1|:inositol-tetrakisphosphate 1-kinase isoform b [Homo sapiens] ;	1.30184	0.967721	0.380555	0.0142499	0.00011812	3.354e-05	7.53e-05	0	7.56533e-05	7	2	4	0	3.25	4.007e-05	3.001e-05	4.476e-05	0.00011761	5.81125e-05	2	1	1	1	1.25
ARHGEF2	gi|15011974|ref|NP_004714.2|:rho guanine nucleotide exchange factor 2 isoform 3 [Homo sapiens] ;gi|253735775|ref|NP_001155855.1|:rho guanine nucleotide exchange factor 2 isoform 1 [Homo sapiens] ;gi|253735778|ref|NP_001155856.1|:rho guanine nucleotide exchange factor 2 isoform 2 [Homo sapiens] ;gi|530365588|ref|XP_005245644.1|:PREDICTED: rho guanine nucleotide exchange factor 2 isoform X1 [Homo s…	1.29789	0.372297	0.376169	0.42911	7.292e-05	0.00013768	0.00013016	0.00017314	0.000128475	10	19	16	17	15.5	0.00011256	7.783e-05	0.00015474	5.082e-05	9.89875e-05	13	6	8	1	7
RPS4X	40S ribosomal protein S4, X isoform X isoform [Homo sapiens]	1.29669	0.161923	0.37483	0.790692	0.00084998	0.0011878	0.00103715	0.00096456	0.00100987	32	45	35	26	34.5	0.00053619	0.00113394	0.00070458	0.00074053	0.00077881	17	24	10	4	13.75
AKAP9	gi|22538387|ref|NP_005742.4|:A-kinase anchor protein 9 isoform 2 [Homo sapiens] ;gi|22538393|ref|NP_671714.1|:A-kinase anchor protein 9 isoform 3 [Homo sapiens] ;gi|578813854|ref|XP_006715890.1|:PREDICTED: A-kinase anchor protein 9 isoform X3 [Homo sapiens] ;	1.29522	0.13423	0.373199	0.872149	0.00010192	0.00010483	9.575e-05	9.24e-05	9.8725e-05	57	59	48	37	50.25	8.917e-05	4.135e-05	9.96e-05	7.477e-05	7.62225e-05	42	13	21	6	20.5
AHNAK	PREDICTED: neuroblast differentiation-associated protein AHNAK isoform X4 [Homo sapiens]	1.29508	0.550838	0.373047	0.258976	0.00020772	0.00010743	0.00041253	0.00010019	0.000206967	171.333	89.1667	305	59.1667	156.167	0.00016988	0.00016641	0.00019028	0.00011267	0.00015981	118	77.1667	59.1667	13.3333	66.9167
CDS2	phosphatidate cytidylyltransferase 2 [Homo sapiens]	1.29399	0.199583	0.371828	0.699877	7.849e-05	3.12e-05	3.503e-05	0	4.824e-05	5	2	2	0	2.25	3.728e-05	0	0	0	3.728e-05	2	0	0	0	0.5
VPS13C	gi|42544121|ref|NP_060154.3|:vacuolar protein sorting-associated protein 13C isoform 1A [Homo sapiens] ;gi|66347828|ref|NP_065872.1|:vacuolar protein sorting-associated protein 13C isoform 2A [Homo sapiens] ;	1.29357	0.00833342	0.371355	2.07918	9.603e-05	7.859e-05	7.562e-05	8.416e-05	8.36e-05	51	42	36	32	40.25	6.931e-05	6.364e-05	5.994e-05	6.562e-05	6.46275e-05	31	19	12	5	16.75
CDC20	cell division cycle protein 20 homolog [Homo sapiens]	1.29247	0.385041	0.370129	0.414493	8.4e-05	0.00013912	0.00020303	0.00011732	0.000135867	6	10	13	6	8.75	4.987e-05	0.00012451	0.00014854	9.757e-05	0.000105123	3	5	4	1	3.25
TMED5	transmembrane emp24 domain-containing protein 5 isoform 1 precursor [Homo sapiens]	1.29128	0.479097	0.368805	0.319576	0	0.0002122	6.806e-05	0	0.00014013	0	7	2	0	2.25	0	0.00010852	0	0	0.00010852	0	2	0	0	0.5
AAAS	gi|12962937|ref|NP_056480.1|:aladin isoform 1 [Homo sapiens] ;gi|291045307|ref|NP_001166937.1|:aladin isoform 2 [Homo sapiens] ;	1.29026	0.488244	0.367662	0.311363	0.0002303	0.00011443	9.992e-05	7.148e-05	0.000129032	18	9	7	4	9.5	0.00015193	9.103e-05	6.788e-05	8.918e-05	0.000100005	10	4	2	1	4.25
AHSA1	activator of 90 kDa heat shock protein ATPase homolog 1 [Homo sapiens]	1.28993	0.290151	0.367289	0.537376	0.00088872	0.00071885	0.00073784	0.0006062	0.000737902	43	35	32	21	32.75	0.00080988	0.00077204	0.00027412	0.00043216	0.00057205	33	21	5	3	15.5
CTTN	src substrate cortactin isoform a [Homo sapiens]	1.28929	0.241408	0.366582	0.617248	0.00132094	0.00078255	0.00107691	0.00125953	0.00110998	104	62	76	71	78.25	0.00099542	0.00112965	0.00087599	0.00044263	0.000860922	66	50	26	5	36.75
SSBP1	gi|374671789|ref|NP_001243442.1|:single-stranded DNA-binding protein, mitochondrial precursor [Homo sapiens] ;gi|530387119|ref|XP_005250108.1|:PREDICTED: single-stranded DNA-binding protein, mitochondrial isoform X4 [Homo sapiens] ;	1.28888	0.267036	0.366123	0.573431	0.00037761	0.00014072	0.00047392	0.00032963	0.00033047	8	3	9	5	6.25	0.00022419	0.0004198	0.00012521	0	0.0002564	4	5	1	0	2.5
	gi|578821454|ref|XP_006718632.1|:PREDICTED: nuclear mitotic apparatus protein 1 isoform X8 [Homo sapiens] ;gi|578821456|ref|XP_006718633.1|:PREDICTED: nuclear mitotic apparatus protein 1 isoform X9 [Homo sapiens] ;	1.28808	0.147959	0.365226	0.829858	0.00096116	0.00103063	0.00096911	0.00093648	0.000974345	291	314	263	203	267.75	0.00085893	0.00090478	0.00089367	0.00036834	0.00075643	219	154	102	16	122.75
SPAG9	gi|27436920|ref|NP_003962.3|:C-Jun-amino-terminal kinase-interacting protein 4 isoform 3 [Homo sapiens] ;gi|530413061|ref|XP_005257828.1|:PREDICTED: C-Jun-amino-terminal kinase-interacting protein 4 isoform X5 [Homo sapiens] ;	1.28798	0.0670999	0.365112	1.17328	0.00040072	0.00037858	0.00034946	0.00044044	0.0003923	74.9737	71.2771	58.6066	59	65.9643	0.00027926	0.00033276	0.0003828	0.00022352	0.000304585	44	35	27	6	28
PEX19	gi|302370946|ref|NP_001180573.1|:peroxisomal biogenesis factor 19 isoform c [Homo sapiens] ;gi|4506339|ref|NP_002848.1|:peroxisomal biogenesis factor 19 isoform a [Homo sapiens] ;	1.28718	0.421177	0.364211	0.375535	0.00017527	0.00014929	0.0001676	0.00010491	0.000149267	7	6	6	3	5.5	0.00017839	4.454e-05	6.642e-05	0.00017451	0.000115965	6	1	1	1	2.25
YBEY	gi|530419307|ref|XP_005261211.1|:PREDICTED: putative ribonuclease isoform X2 [Homo sapiens] ;gi|530419309|ref|XP_005261212.1|:PREDICTED: putative ribonuclease isoform X3 [Homo sapiens] ;gi|54607074|ref|NP_001006114.1|:putative ribonuclease isoform 2 [Homo sapiens] ;	1.28379	0.757833	0.360406	0.120427	0.00020791	0.00024793	0.00055667	0	0.000337503	5	6	12	0	5.75	9.875e-05	0	0.0001103	0.00057964	0.000262897	2	0	1	2	1.25
RBM15	gi|319996623|ref|NP_001188474.1|:putative RNA-binding protein 15 isoform 2 [Homo sapiens] ;gi|47933339|ref|NP_073605.4|:putative RNA-binding protein 15 isoform 1 [Homo sapiens] ;	1.28059	0.469821	0.356811	0.328068	0.00012256	0.00019343	0.00028954	0.0001309	0.000184107	17	27	36	13	23.25	0.00012841	0.00020518	0.00019123	5.025e-05	0.000143768	15	16	10	1	10.5
TRMT5	gi|145275187|ref|NP_065861.2|:tRNA (guanine(37)-N1)-methyltransferase [Homo sapiens] ;gi|578826007|ref|XP_005267973.2|:PREDICTED: tRNA (guanine(37)-N1)-methyltransferase isoform X1 [Homo sapiens] ;	1.27969	0.13739	0.3558	0.862045	1.372e-05	4.092e-05	0.0001378	5.751e-05	6.24875e-05	1	3	9	3	4	0	4.883e-05	0	0	4.883e-05	0	2	0	0	0.5
FAF2	FAS-associated factor 2 [Homo sapiens]	1.27852	0.102424	0.354473	0.989598	4.709e-05	0.0001248	0.00021016	4.385e-05	0.000106475	3	8	12	2	6.25	0	0	8.328e-05	0	8.328e-05	0	0	2	0	0.5
SUCLG1	succinyl-CoA ligase [ADP/GDP-forming] subunit alpha, mitochondrial precursor [Homo sapiens]	1.27849	0.0617304	0.354441	1.2095	0.00058551	0.00056178	0.00060816	0.00050758	0.000565758	29	28	27	18	25.5	0.00045552	0.00032322	0.00042845	0.00056289	0.00044252	19	9	8	4	10
AARS	alanine--tRNA ligase, cytoplasmic [Homo sapiens]	1.27642	0.154803	0.352101	0.81022	7.938e-05	0.00010757	6.441e-05	9.072e-05	8.552e-05	11	15	8	9	10.75	8.569e-05	7.702e-05	3.829e-05	0	6.7e-05	10	6	2	0	4.5
PDHB	pyruvate dehydrogenase E1 component subunit beta, mitochondrial isoform 1 precursor [Homo sapiens]	1.2756	0.369011	0.351181	0.432961	0.00025297	0.00019337	0.00015196	0.00016307	0.000190342	13	10	7	6	9	0.00025417	0.00010384	0.00010323	0.00013563	0.000149217	11	3	2	1	4.25
EIF4G1	eukaryotic translation initiation factor 4 gamma 1 isoform 1 [Homo sapiens]	1.27385	0.0937298	0.349194	1.02812	0.00102725	0.00087254	0.00080815	0.00084369	0.000887908	235.279	201.103	165.914	138.353	185.162	0.00082128	0.00084324	0.00062909	0.0004945	0.000697028	158.411	108.576	54.3185	16.25	84.3887
	PREDICTED: vimentin isoform X1 [Homo sapiens]	1.27238	0.168487	0.347529	0.773435	0.0142064	0.00942362	0.00924018	0.00954062	0.0106027	947.672	632.584	552.508	455.67	647.108	0.0105506	0.00786631	0.00822967	0.00668536	0.00833298	592.701	295	206.958	63.9844	289.661
RAD50	DNA repair protein RAD50 [Homo sapiens]	1.27218	0.155721	0.347298	0.807652	0.00040999	0.00026456	0.00043957	0.00035696	0.00036777	77	50	74	48	62.25	0.00022129	0.00035043	0.00032485	0.00025978	0.000289087	35	37	23	7	25.5
DVL3	PREDICTED: segment polarity protein dishevelled homolog DVL-3 isoform X1 [Homo sapiens]	1.27182	0.119188	0.346889	0.923767	0.00179337	0.00182252	0.0014382	0.00183452	0.00172215	184.324	188.5	132.5	135	160.081	0	0.001722	0.0009162	0.00142407	0.00135409	0	99.5	35.5	21	39
TBL3	transducin beta-like protein 3 [Homo sapiens]	1.27079	0.487052	0.345731	0.312425	6.052e-05	0.0001031	6.752e-05	2.415e-05	6.38225e-05	7	12	7	2	7	4.107e-05	3.076e-05	6.88e-05	6.026e-05	5.02225e-05	4	2	3	1	2.5
CHORDC1	cysteine and histidine-rich domain-containing protein 1 isoform a [Homo sapiens]	1.26902	0.109747	0.343712	0.959609	0.00119936	0.00131731	0.00117371	0.00123431	0.00123117	57	63	50	42	53	0.00059965	0.0009357	0.00117211	0.00117325	0.000970177	24	25	21	8	19.5
GANAB	gi|38202257|ref|NP_938148.1|:neutral alpha-glucosidase AB isoform 2 precursor [Homo sapiens] ;gi|88900491|ref|NP_938149.2|:neutral alpha-glucosidase AB isoform 3 precursor [Homo sapiens] ;	1.26875	0.427037	0.343408	0.369534	1.48e-05	4.412e-05	3.302e-05	0	3.06467e-05	2	6	4	0	3	3.515e-05	1.316e-05	0	0	2.4155e-05	4	1	0	0	1.25
TUBB6	tubulin beta-6 chain [Homo sapiens]	1.26868	0.2702	0.343331	0.568315	0.00051428	0.00081998	0.00069249	0.00066405	0.0006727	32.8339	52.6808	39.6295	30.3547	38.8747	0.00057696	0.00068614	0.00061715	0.00024069	0.000530235	31.0208	24.6271	14.8538	2.20476	18.1766
UBE2D3	gi|33149320|ref|NP_871620.1|:ubiquitin-conjugating enzyme E2 D3 isoform 1 [Homo sapiens] ;gi|33149324|ref|NP_871622.1|:ubiquitin-conjugating enzyme E2 D3 isoform 3 [Homo sapiens] ;gi|33188456|ref|NP_862821.1|:ubiquitin-conjugating enzyme E2 D2 isoform 2 [Homo sapiens] ;gi|4507775|ref|NP_003330.1|:ubiquitin-conjugating enzyme E2 D2 isoform 1 [Homo sapiens] ;gi|578809338|ref|XP_006714362.1|:PREDICT…	1.26821	0.778948	0.342793	0.108491	2.376e-05	0.00033057	0.00010603	0	0.000153453	0.5	7	2	0	2.375	0.00011286	8.453e-05	0	0.00016561	0.000121	2	1	0	0.5	0.875
AIF1L	gi|13899241|ref|NP_113614.1|:allograft inflammatory factor 1-like isoform 1 [Homo sapiens] ;gi|297374815|ref|NP_001172024.1|:allograft inflammatory factor 1-like isoform 3 [Homo sapiens] ;	1.2648	0.131464	0.338904	0.881194	0.000326	0.00032396	0.00036369	0.00019514	0.000302197	7	7	7	3	6	0.0002212	0.00024852	0.00024707	0	0.00023893	4	3	2	0	2.25
FGD6	gi|154240686|ref|NP_060821.3|:FYVE, RhoGEF and PH domain-containing protein 6 [Homo sapiens] ;gi|530400569|ref|XP_005269081.1|:PREDICTED: FYVE, RhoGEF and PH domain-containing protein 6 isoform X1 [Homo sapiens] ;	1.2646	0.402849	0.338676	0.394858	0	1.942e-05	1.09e-05	1.365e-05	1.46567e-05	0	4	2	2	2	5.8e-06	1.738e-05	0	0	1.159e-05	1	2	0	0	0.75
PRPSAP2	gi|345478666|ref|NP_001230865.1|:phosphoribosyl pyrophosphate synthase-associated protein 2 isoform 2 [Homo sapiens] ;gi|530410493|ref|XP_005256783.1|:PREDICTED: phosphoribosyl pyrophosphate synthase-associated protein 2 isoform X3 [Homo sapiens] ;gi|530410499|ref|XP_005256786.1|:PREDICTED: phosphoribosyl pyrophosphate synthase-associated protein 2 isoform X6 [Homo sapiens] ;	1.26328	0.228572	0.337173	0.640976	0.00065823	0.00052751	0.00049745	0.00080072	0.000620977	31	25	21	27	26	0.00065555	0.00052877	0.00033794	0.00044398	0.00049156	26	14	6	3	12.25
APOBEC3C	DNA dC-_dU-editing enzyme APOBEC-3C [Homo sapiens]	1.26171	0.605014	0.335381	0.218234	0.00039107	0.00087689	0.00032814	0.00025676	0.000463215	10.6364	24	8	5	11.9091	0.00017464	0.0001962	0.00058517	0.00051252	0.000367133	4	3	6	2	3.75
BUD13	BUD13 homolog isoform 1 [Homo sapiens]	1.2615	0.437766	0.335144	0.358758	2.257e-05	0	5.036e-05	1.576e-05	2.95633e-05	2	0	4	1	1.75	2.68e-05	2.007e-05	0	0	2.3435e-05	2	1	0	0	0.75
MYO1C	gi|124494238|ref|NP_001074248.1|:unconventional myosin-Ic isoform a [Homo sapiens] ;gi|124494240|ref|NP_203693.3|:unconventional myosin-Ic isoform c [Homo sapiens] ;gi|124494247|ref|NP_001074419.1|:unconventional myosin-Ic isoform b [Homo sapiens] ;gi|530410349|ref|XP_005256712.1|:PREDICTED: unconventional myosin-Ic isoform X1 [Homo sapiens] ;	1.2572	0.186736	0.330219	0.728773	0.00012486	0.00019592	0.00018329	0.00014686	0.000162733	19	30	25	16	22.5	0.00014046	0.00016366	0.00012203	9.161e-05	0.00012944	18	14	7	2	10.25
TM9SF3	transmembrane 9 superfamily member 3 precursor [Homo sapiens]	1.2562	0.359489	0.329063	0.444314	0.00023721	0.00018858	0.00017201	0.00019878	0.000199145	20	16	13	12	15.25	7.042e-05	0.00018987	0.00012584	0.00024799	0.00015853	5	9	4	3	5.25
VRK1	gi|4507903|ref|NP_003375.1|:serine/threonine-protein kinase VRK1 [Homo sapiens] ;gi|578826098|ref|XP_006720310.1|:PREDICTED: serine/threonine-protein kinase VRK1 isoform X3 [Homo sapiens] ;gi|578826100|ref|XP_005268098.2|:PREDICTED: serine/threonine-protein kinase VRK1 isoform X2 [Homo sapiens] ;	1.25495	0.796444	0.327627	0.0988446	0	5.259e-05	3.936e-05	0	4.5975e-05	0	3	2	0	1.25	4.189e-05	3.138e-05	0	0	3.6635e-05	2	1	0	0	0.75
OXSR1	gi|4826878|ref|NP_005100.1|:serine/threonine-protein kinase OSR1 [Homo sapiens] ;gi|530373508|ref|XP_005265695.1|:PREDICTED: serine/threonine-protein kinase OSR1 isoform X1 [Homo sapiens] ;	1.25445	0.87918	0.327058	0.0559224	0	0	2.958e-05	0	2.958e-05	0	0	2	0	0.5	0	2.358e-05	0	0	2.358e-05	0	1	0	0	0.25
GLOD4	gi|217330598|ref|NP_057164.3|:glyoxalase domain-containing protein 4 [Homo sapiens] ;gi|578829940|ref|XP_006721603.1|:PREDICTED: glyoxalase domain-containing protein 4 isoform X1 [Homo sapiens] ;	1.2542	0.879285	0.326764	0.0558703	0	0	5.23e-05	0	5.23e-05	0	0	2	0	0.5	0	4.17e-05	0	0	4.17e-05	0	1	0	0	0.25
PRKAB1	PREDICTED: 5'-AMP-activated protein kinase subunit beta-1 isoform X1 [Homo sapiens]	1.2531	0.560416	0.325505	0.25149	0.00020698	0.00030853	0.00034637	0.00010841	0.000242572	8	12	12	3	8.75	0.00018434	9.205e-05	0.00013726	0.00036066	0.000193578	6	2	2	2	3
	gi|578840292|ref|XP_006725361.1|:PREDICTED: 14-3-3 protein epsilon isoform X1 [Homo sapiens] ;gi|5803225|ref|NP_006752.1|:14-3-3 protein epsilon [Homo sapiens] ;	1.2507	0.356785	0.322737	0.447593	0.00014554	0.00034265	0.00016236	8.131e-05	0.000182965	5	11.8462	5	2	5.96154	0.00010369	0.00010355	0.00023163	0	0.00014629	3	2	3	0	2
	gi|578817539|ref|XP_006717199.1|:PREDICTED: 28S ribosomal protein S2, mitochondrial isoform X1 [Homo sapiens] ;gi|7705805|ref|NP_057118.1|:28S ribosomal protein S2, mitochondrial [Homo sapiens] ;	1.24898	0.0640306	0.320753	1.19361	0.00015329	8.705e-05	0.00012215	0.00012234	0.000121208	7	4	5	4	5	0	7.791e-05	0.00011618	0	9.7045e-05	0	2	2	0	1
CDV3	gi|530374895|ref|XP_005247645.1|:PREDICTED: protein CDV3 homolog isoform X1 [Homo sapiens] ;gi|8923710|ref|NP_060018.1|:protein CDV3 homolog isoform b [Homo sapiens] ;	1.24692	0.588775	0.318369	0.23005	0.00040458	0.00024123	0.00054163	0.00011301	0.000325112	15	9	18	3	11.25	0.00044839	0.00019191	0.00021464	0.00018799	0.000260733	14	4	3	1	5.5
IDH3B	gi|28178821|ref|NP_008830.2|:isocitrate dehydrogenase [NAD] subunit beta, mitochondrial isoform a precursor [Homo sapiens] ;gi|530425723|ref|XP_005260773.1|:PREDICTED: isocitrate dehydrogenase [NAD] subunit beta, mitochondrial isoform X1 [Homo sapiens] ;	1.2463	0.521365	0.317655	0.282858	0.00023588	0.00041472	0.00040485	0.00025343	0.00032722	13	23	20	10	16.5	0.00015082	0.00048413	0.00028879	0.00012647	0.000262552	7	15	6	1	7.25
MRPS12	28S ribosomal protein S12, mitochondrial precursor [Homo sapiens]	1.24627	0.376248	0.317617	0.424526	0.00015186	0.00045274	0.00079064	0.00049492	0.00047254	3	9	14	7	8.25	6.011e-05	0.00054027	0.00053711	0	0.000379163	1	6	4	0	2.75
NUP93	PREDICTED: nuclear pore complex protein Nup93 isoform X1 [Homo sapiens]	1.24479	0.321148	0.315904	0.493294	0.0003753	0.00033905	0.00028547	0.000274	0.000318455	44	40	30	23	34.25	0.00034437	0.00033379	0.00022626	0.0001189	0.00025583	34	22	10	2	17
NAPG	gamma-soluble NSF attachment protein [Homo sapiens]	1.24444	0.37547	0.315501	0.425424	6.717e-05	0.00028925	0.00022481	0.00015636	0.000184397	3	13	9	5	7.5	0.00010635	0.00027879	5.939e-05	0	0.000148177	4	7	1	0	3
EIF5A	gi|219555707|ref|NP_001137232.1|:eukaryotic translation initiation factor 5A-1 isoform A [Homo sapiens] ;gi|530410036|ref|XP_005256566.1|:PREDICTED: eukaryotic translation initiation factor 5A-1 isoform X5 [Homo sapiens] ;	1.24227	0.0630439	0.312976	1.20036	0.00398642	0.00335782	0.003812	0.00445424	0.00390262	105	89	90	84	92	0.00383201	0.00270133	0.00312198	0.0029108	0.00314153	85	40	31	11	41.75
SLC25A4	ADP/ATP translocase 1 [Homo sapiens]	1.23769	0.822814	0.307648	0.0846982	0.00032989	0	0.00018531	0	0.0002576	14.0725	0	7.08571	0	5.28954	0	0.00029189	0.00012437	0	0.00020813	0	7	2	0	2.25
HSD17B12	estradiol 17-beta-dehydrogenase 12 [Homo sapiens]	1.23706	0.381049	0.306919	0.419019	0.00073888	0.00089	0.00079932	0.00071926	0.000786865	33	40	32	23	32	0.00047857	0.00055758	0.00041575	0.0010924	0.000636075	18	14	7	7	11.5
	PREDICTED: pyruvate carboxylase, mitochondrial isoform X5 [Homo sapiens]	1.23587	0.165834	0.305526	0.780327	0.0211529	0.0205844	0.0186103	0.0260488	0.0215991	3567	3493	2813	3145	3254.5	0.0162383	0.0223417	0.0188451	0.0124824	0.0174768	2306	2118	1198	302	1481
SLK	PREDICTED: STE20-like serine/threonine-protein kinase isoform X1 [Homo sapiens]	1.2351	0.276618	0.304624	0.55812	0.00039389	0.00031135	0.00033012	0.00026742	0.000325695	67.8871	54	51	33	51.4718	0.00037893	0.00028898	0.00018469	0.0002022	0.0002637	55	28	12	5	25
PTK2	gi|24476013|ref|NP_722560.1|:focal adhesion kinase 1 isoform a [Homo sapiens] ;gi|27886593|ref|NP_005598.3|:focal adhesion kinase 1 isoform b [Homo sapiens] ;gi|313851044|ref|NP_001186578.1|:focal adhesion kinase 1 isoform c [Homo sapiens] ;gi|530389200|ref|XP_005251060.1|:PREDICTED: focal adhesion kinase 1 isoform X1 [Homo sapiens] ;gi|530389202|ref|XP_005251061.1|:PREDICTED: focal adhesion kina…	1.23034	0.852248	0.299052	0.0694338	0	6.6e-06	3.704e-05	0	2.182e-05	0	1	5	0	1.5	2.366e-05	1.181e-05	0	0	1.7735e-05	3	1	0	0	1
ZNF326	DBIRD complex subunit ZNF326 isoform 1 [Homo sapiens]	1.23011	0.615603	0.298787	0.210699	0.00016804	0.00019085	0.00048207	0.00026823	0.000277297	14	16	36	16	20.5	0.00014253	0.00021351	0.00012736	0.0004183	0.000225425	10	10	4	5	7.25
PGD	6-phosphogluconate dehydrogenase, decarboxylating [Homo sapiens]	1.23009	0.380098	0.298768	0.420105	0.00076655	0.00067552	0.00048406	0.00058582	0.000627987	53	47	30	29	39.75	0.00079002	0.00056599	0.00038365	0.00030242	0.00051052	46	22	10	3	20.25
RPL17	gi|313569776|ref|NP_001186273.1|:60S ribosomal protein L17 isoform a [Homo sapiens] ;gi|313569822|ref|NP_001186284.1|:RPL17-C18orf32 protein isoform 1 [Homo sapiens] ;	1.22992	0.378602	0.298567	0.421817	0.00129084	0.00079229	0.0007624	0.00084843	0.00092349	34	21	18	16	22.25	0.00112706	0.00074286	0.00060425	0.00052924	0.000750853	25	11	6	2	11
PPM1A	gi|193211600|ref|NP_808821.2|:protein phosphatase 1A isoform 3 [Homo sapiens] ;gi|578825910|ref|XP_006720243.1|:PREDICTED: protein phosphatase 1A isoform X7 [Homo sapiens] ;	1.22483	0.353946	0.292584	0.451063	0.00018424	0.00025937	0.0003597	0.00038599	0.000297325	12	17	21	18	17	0.00020054	0.00024579	0.00020363	0.00032103	0.000242747	11	9	5	3	7
	PREDICTED: phospholipase D3 isoform X11 [Homo sapiens]	1.22358	0.231979	0.291109	0.634552	0	7.084e-05	9.543e-05	1.991e-05	6.206e-05	0	5	6	1	3	0	5.072e-05	0	0	5.072e-05	0	2	0	0	0.5
TLN1	talin-1 [Homo sapiens]	1.22278	0.0691588	0.290167	1.16015	0.00050585	0.00056552	0.00048766	0.00048765	0.00051167	184	207	159	127	169.25	0.00044071	0.00047435	0.00045214	0.00030659	0.000418448	135	97	62	16	77.5
NUP160	nuclear pore complex protein Nup160 [Homo sapiens]	1.22059	0.294171	0.287582	0.5314	0.00019945	0.00023204	0.00017367	0.0001291	0.000183565	41	48	32	19	35	0.00016752	0.00019037	0.00014195	0.00010172	0.00015039	29	22	11	3	16.25
MTHFD1L	gi|337756501|ref|NP_001229696.1|:monofunctional C1-tetrahydrofolate synthase, mitochondrial isoform 1 precursor [Homo sapiens] ;gi|337756507|ref|NP_001229697.1|:monofunctional C1-tetrahydrofolate synthase, mitochondrial isoform 3 [Homo sapiens] ;gi|36796743|ref|NP_056255.2|:monofunctional C1-tetrahydrofolate synthase, mitochondrial isoform 2 precursor [Homo sapiens] ;gi|530383548|ref|XP_005266964…	1.21634	0.514144	0.282549	0.288915	4.281e-05	9.927e-05	0.00013533	0.00010963	9.676e-05	6	14	17	11	12	0.00011015	0.00010154	5.678e-05	4.973e-05	7.955e-05	13	8	3	1	6.25
PDCD6IP	programmed cell death 6-interacting protein isoform 2 [Homo sapiens]	1.21497	0.453999	0.280926	0.342945	0.00048812	0.00032603	0.00030352	0.00039117	0.00037721	61	41	34	35	42.75	0.00045609	0.00035584	0.00031839	0.00011155	0.000310467	48	25	15	2	22.5
PTBP3	gi|255003744|ref|NP_001157262.1|:polypyrimidine tract-binding protein 3 isoform 3 [Homo sapiens] ;gi|349732186|ref|NP_001231825.1|:polypyrimidine tract-binding protein 3 isoform 4 [Homo sapiens] ;gi|349732190|ref|NP_001231826.1|:polypyrimidine tract-binding protein 3 isoform 5 [Homo sapiens] ;gi|349732192|ref|NP_001231827.1|:polypyrimidine tract-binding protein 3 isoform 6 [Homo sapiens] ;gi|3856…	1.21364	0.82453	0.279337	0.0837938	0	0	4.213e-05	5.274e-05	4.7435e-05	0	0	3	3	1.5	0	4.478e-05	3.339e-05	0	3.9085e-05	0	2	1	0	0.75
TRAP1	gi|155722983|ref|NP_057376.2|:heat shock protein 75 kDa, mitochondrial isoform 1 precursor [Homo sapiens] ;gi|440309857|ref|NP_001258978.1|:heat shock protein 75 kDa, mitochondrial isoform 2 [Homo sapiens] ;	1.21317	0.101159	0.278777	0.994996	0.00094268	0.00106497	0.00071956	0.00095629	0.000920875	95	108	65	69	84.25	0.00084837	0.00081193	0.00068436	0.00069161	0.000759068	72	46	26	10	38.5
RPS8	40S ribosomal protein S8 [Homo sapiens]	1.21048	0.325546	0.275581	0.487388	0.00275399	0.00267	0.00172354	0.00187633	0.00225596	82	80	46	40	62	0.00151546	0.00149352	0.00187086	0.00257493	0.00186369	38	25	21	11	23.75
C14orf166	UPF0568 protein C14orf166 [Homo sapiens]	1.20899	0.165808	0.273802	0.780394	0.00062986	0.00042676	0.00044716	0.00055982	0.0005159	22	15	14	14	16.25	0.00054395	0.00035649	0.00037972	0	0.00042672	16	7	5	0	7
	PREDICTED: PRKC apoptosis WT1 regulator protein isoform X1 [Homo sapiens]	1.20694	0.465625	0.27135	0.331964	6.164e-05	0	0	0.00011479	8.8215e-05	3	0	0	4	1.75	0	7.309e-05	0	0	7.309e-05	0	2	0	0	0.5
DVL3	segment polarity protein dishevelled homolog DVL-3 [Homo sapiens]	1.20473	0.781411	0.268705	0.10712	0	0.00182761	0.00144222	0.00183964	0.00170316	0	188.5	132.5	135	114	0.0015813	0.00172681	0.00091876	0.00142805	0.00141373	136.49	99.5	35.5	21	73.1226
CDK2	cyclin-dependent kinase 2 isoform 1 [Homo sapiens]	1.20322	0.520773	0.266896	0.283351	0.00026255	0.00021347	0.00024066	0.00023492	0.0002379	11.2	9.16364	9.20225	7.175	9.18522	0.00022551	8.638e-05	0.00013043	0.00034856	0.00019772	8.10127	2.07143	2.09756	2.13333	3.6009
CPNE1	gi|197333761|ref|NP_003906.2|:copine-1 isoform b [Homo sapiens] ;gi|23397702|ref|NP_690905.1|:copine-1 isoform a [Homo sapiens] ;gi|311893345|ref|NP_001185792.1|:copine-1 isoform c [Homo sapiens] ;	1.20228	0.858301	0.265771	0.0663603	5.156e-05	1.281e-05	0	0	3.2185e-05	4	1	0	0	1.25	3.061e-05	2.293e-05	0	0	2.677e-05	2	1	0	0	0.75
PDCL3	phosducin-like protein 3 [Homo sapiens]	1.20176	0.573514	0.26515	0.241456	0.00029229	0.00055188	0.00048913	0.00036742	0.00042518	10	19	15	9	13.25	0.00031237	0.00010398	0.00038767	0.00061117	0.000353797	9	2	5	3	4.75
EIF4H	gi|11559923|ref|NP_071496.1|:eukaryotic translation initiation factor 4H isoform 1 [Homo sapiens] ;gi|14702180|ref|NP_114381.1|:eukaryotic translation initiation factor 4H isoform 2 [Homo sapiens] ;	1.20159	0.51712	0.264949	0.286409	0.00025351	0.00025193	0.0001257	0.00019671	0.000206962	9	9	4	5	6.75	0.00026759	0.00015032	7.472e-05	0.00019633	0.00017224	8	3	1	1	3.25
SRGAP2	PREDICTED: SLIT-ROBO Rho GTPase-activating protein 2 isoform X2 [Homo sapiens]	1.20055	0.529223	0.263698	0.276362	4.57e-05	8.434e-05	5.827e-05	6.383e-05	6.3035e-05	7	13	8	7	8.75	7.752e-05	6.968e-05	1.732e-05	4.55e-05	5.2505e-05	10	6	1	1	4.5
RTCB	tRNA-splicing ligase RtcB homolog [Homo sapiens]	1.20047	0.129416	0.263603	0.888012	0.00087149	0.00070107	0.00067903	0.00067622	0.000731953	63	51	44	35	48.25	0.00060777	0.00061515	0.00073388	0.00048208	0.00060972	37	25	20	5	21.75
MED19	gi|23592232|ref|NP_703151.1|:mediator of RNA polymerase II transcription subunit 19 [Homo sapiens] ;gi|530396419|ref|XP_005273878.1|:PREDICTED: mediator of RNA polymerase II transcription subunit 19 isoform X1 [Homo sapiens] ;	1.20017	0.814953	0.263236	0.0888673	0	3.578e-05	0.00012052	0.00020117	0.000119157	0	1	3	4	2	4.276e-05	6.405e-05	0.00019104	0	9.92833e-05	1	1	2	0	1
CENPJ	centromere protein J [Homo sapiens]	1.1989	0.116221	0.261714	0.934715	1.044e-05	2.594e-05	2.33e-05	1.458e-05	1.8565e-05	2	5	4	2	3.25	1.24e-05	1.857e-05	0	0	1.5485e-05	2	2	0	0	1
DSTN	gi|5802966|ref|NP_006861.1|:destrin isoform a [Homo sapiens] ;gi|58530848|ref|NP_001011546.1|:destrin isoform b [Homo sapiens] ;	1.19854	0.755533	0.26128	0.121747	0.00025403	0.00012622	0.00023616	0	0.00020547	6	3	5	0	3.5	0.00025137	0.00015062	0.00011231	0	0.000171433	5	2	1	0	2
VPS35	vacuolar protein sorting-associated protein 35 [Homo sapiens]	1.19811	0.857324	0.260756	0.0668552	0	3.488e-05	5.874e-05	0	4.681e-05	0	4	6	0	2.5	6.253e-05	1.561e-05	0	0	3.907e-05	6	1	0	0	1.75
INTS7	gi|315259086|ref|NP_001186740.1|:integrator complex subunit 7 isoform 2 [Homo sapiens] ;gi|315283203|ref|NP_001186741.1|:integrator complex subunit 7 isoform 3 [Homo sapiens] ;gi|7661566|ref|NP_056249.1|:integrator complex subunit 7 isoform 1 [Homo sapiens] ;	1.19608	0.231816	0.258319	0.634856	5.158e-05	7.323e-05	7.399e-05	3.088e-05	5.742e-05	7	10	9	3	7.25	5.25e-05	5.243e-05	3.909e-05	0	4.80067e-05	6	4	2	0	3
CALD1	caldesmon isoform 5 [Homo sapiens]	1.19518	0.616995	0.257224	0.209719	0.00026	0.00025445	0.00051272	0.0005502	0.000394343	19.8	19.5	35	30	26.075	0.00025728	0.00060729	0.00022641	0.0002288	0.000329945	16.5	26	6.5	2.5	12.875
ATP1A1	gi|21361181|ref|NP_000692.2|:sodium/potassium-transporting ATPase subunit alpha-1 isoform a [Homo sapiens] ;gi|237681109|ref|NP_001153705.1|:sodium/potassium-transporting ATPase subunit alpha-1 isoform c [Homo sapiens] ;	1.19169	0.438549	0.253015	0.357982	0.00010243	0.0001425	0.00011427	0.00013353	0.000123182	15	21	15	14	16.25	4.054e-05	0.00012147	0.00010868	0.00014278	0.000103367	5	10	6	3	6
DVL2	segment polarity protein dishevelled homolog DVL-2 [Homo sapiens]	1.19081	0.0760671	0.251945	1.1188	0.00436578	0.00502499	0.00577818	0.00540746	0.0051441	459.968	532.755	545.683	407.905	486.578	0.00462535	0.00394878	0.00387592	0.00482927	0.00431983	410.39	233.887	153.945	73	217.806
HN1L	hematological and neurological expressed 1-like protein [Homo sapiens]	1.19014	0.416894	0.251128	0.379975	0.00084564	0.00062113	0.00086138	0.00066758	0.000748933	23	17	21	13	18.5	0.00096049	0.00065401	0.00039011	0.00051252	0.000629283	22	10	4	2	9.5
NDC1	gi|271398350|ref|NP_060557.3|:nucleoporin NDC1 isoform 1 [Homo sapiens] ;gi|271398379|ref|NP_001162023.1|:nucleoporin NDC1 isoform 2 [Homo sapiens] ;gi|578799444|ref|XP_006710825.1|:PREDICTED: nucleoporin NDC1 isoform X1 [Homo sapiens] ;	1.18848	0.802032	0.249124	0.0958085	8.292e-05	0	2.313e-05	2.895e-05	4.5e-05	8	0	2	2	3	4.923e-05	3.687e-05	2.749e-05	0	3.78633e-05	4	2	1	0	1.75
ATP5A1	ATP synthase subunit alpha, mitochondrial isoform a precursor [Homo sapiens]	1.18712	0.139345	0.24747	0.855907	0.00402975	0.00287472	0.00305818	0.00317585	0.00328463	319	229	217	180	236.25	0.00310506	0.0024268	0.0029823	0.00255335	0.00276688	207	108	89	29	108.25
SMYD4	gi|156616308|ref|NP_443160.2|:SET and MYND domain-containing protein 4 [Homo sapiens] ;gi|578829677|ref|XP_006721500.1|:PREDICTED: SET and MYND domain-containing protein 4 isoform X3 [Homo sapiens] ;	1.18603	0.777963	0.246142	0.109041	8.69e-06	6.044e-05	4.847e-05	1.214e-05	3.2435e-05	1	7	5	1	3.5	1.032e-05	1.546e-05	2.305e-05	6.056e-05	2.73475e-05	1	1	1	1	1
MELK	gi|375493532|ref|NP_001243614.1|:maternal embryonic leucine zipper kinase isoform 2 [Homo sapiens] ;gi|375493536|ref|NP_001243616.1|:maternal embryonic leucine zipper kinase isoform 3 [Homo sapiens] ;gi|375493538|ref|NP_001243617.1|:maternal embryonic leucine zipper kinase isoform 4 [Homo sapiens] ;gi|7661974|ref|NP_055606.1|:maternal embryonic leucine zipper kinase isoform 1 [Homo sapiens] ;	1.18581	0.450354	0.245876	0.346446	0	2.276e-05	2.555e-05	0	2.4155e-05	0	2	2	0	1	0	2.037e-05	0	0	2.037e-05	0	1	0	0	0.25
PTPLAD1	very-long-chain (3R)-3-hydroxyacyl-[acyl-carrier protein] dehydratase 3 [Homo sapiens]	1.18139	0.52689	0.24049	0.27828	0.00071401	0.00055613	0.00049516	0.00061991	0.000596303	37	29	23	23	28	0.00054996	0.00061787	0.00071665	0.0001345	0.000504745	24	18	14	1	14.25
PCBP1	poly(rC)-binding protein 1 [Homo sapiens]	1.18099	0.341832	0.240002	0.466188	0.00247248	0.001482	0.00151052	0.00158961	0.00176365	126	76	69	58	82.25	0.00116505	0.00160562	0.00156156	0.00164122	0.00149336	50	46	30	12	34.5
FXR1	gi|530375353|ref|XP_005247870.1|:PREDICTED: fragile X mental retardation syndrome-related protein 1 isoform X1 [Homo sapiens] ;gi|530375355|ref|XP_005247871.1|:PREDICTED: fragile X mental retardation syndrome-related protein 1 isoform X2 [Homo sapiens] ;gi|530375357|ref|XP_005247872.1|:PREDICTED: fragile X mental retardation syndrome-related protein 1 isoform X3 [Homo sapiens] ;gi|61835148|ref|NP…	1.18026	0.512331	0.239104	0.290449	0.00038278	0.00036309	0.00030087	0.00036452	0.000352815	44	42	31	30	36.75	0.0003409	0.00047971	0.00025384	0.00012127	0.00029893	33	31	11	2	19.25
WDR3	WD repeat-containing protein 3 [Homo sapiens]	1.17792	0.783701	0.23624	0.105849	5.926e-05	8.834e-05	0.00010744	0	8.50133e-05	8	12	13	0	8.25	7.917e-05	0.00011859	3.93e-05	5.163e-05	7.21725e-05	9	9	2	1	5.25
GSG2	serine/threonine-protein kinase haspin [Homo sapiens]	1.17709	0.912456	0.235229	0.039788	0	0	0	1.223e-05	1.223e-05	0	0	0	1	0.25	1.039e-05	0	0	0	1.039e-05	1	0	0	0	0.25
HSD17B10	3-hydroxyacyl-CoA dehydrogenase type-2 isoform 1 [Homo sapiens]	1.1761	0.455386	0.234012	0.341621	0.00128473	0.00066494	0.00116453	0.00115887	0.00106827	48	25	39	31	35.75	0.00111238	0.00090458	0.00049699	0.0011193	0.000908313	35	19	7	6	16.75
CARS2	gi|13375695|ref|NP_078813.1|:probable cysteine--tRNA ligase, mitochondrial [Homo sapiens] ;gi|578825266|ref|XP_006720016.1|:PREDICTED: probable cysteine--tRNA ligase, mitochondrial isoform X6 [Homo sapiens] ;	1.17607	0.912915	0.233975	0.0395694	0	0	0	1.73e-05	1.73e-05	0	0	0	1	0.25	1.471e-05	0	0	0	1.471e-05	1	0	0	0	0.25
LMNB1	lamin-B1 isoform 1 [Homo sapiens]	1.17481	0.509294	0.232429	0.293032	0.00032187	0.00037909	0.00029259	0.0001998	0.000298338	27	32	22	12	23.25	0.00039636	0.00021205	0.00015811	0.00024926	0.000253945	28	10	5	3	11.5
PAICS	gi|119220557|ref|NP_001072992.1|:multifunctional protein ADE2 isoform 2 [Homo sapiens] ;gi|578808622|ref|XP_006714098.1|:PREDICTED: multifunctional protein ADE2 isoform X1 [Homo sapiens] ;	1.17427	0.328004	0.231763	0.48412	0.00198888	0.00119239	0.00177873	0.00229574	0.00181394	121	73	97	100	97.75	0.00144434	0.0013157	0.00170044	0.00171846	0.00154473	74	45	39	15	43.25
GCN1L1	translational activator GCN1 [Homo sapiens]	1.17417	0.383316	0.231641	0.416443	0.00048385	0.00049382	0.00030637	0.00039817	0.000420552	185	190	105	109	147.25	0.00048137	0.00035357	0.00036076	0.00023698	0.00035817	155	76	52	13	74
EEF1B2	elongation factor 1-beta [Homo sapiens]	1.17039	0.366362	0.226985	0.436089	0.00031048	0.00012341	0.0002771	8.673e-05	0.00019943	10	4	8	2	6	0.00018434	0.00011045	0	0.0002164	0.000170397	5	2	0	1	2
TAGLN2	gi|469608407|ref|NP_001264152.1|:transgelin-2 isoform b [Homo sapiens] ;gi|469608410|ref|NP_001264153.1|:transgelin-2 isoform a [Homo sapiens] ;	1.1691	0.265908	0.225396	0.575268	0.00477417	0.00355822	0.00313303	0.00392238	0.00384695	136	102	80	80	99.5	0.00379327	0.00318458	0.00251418	0.00367008	0.00329053	91	51	27	15	46
SUGT1	gi|195963398|ref|NP_001124384.1|:suppressor of G2 allele of SKP1 homolog isoform SGT1B [Homo sapiens] ;gi|5730041|ref|NP_006695.1|:suppressor of G2 allele of SKP1 homolog isoform SGT1A [Homo sapiens] ;	1.16712	0.267867	0.222958	0.572082	0.00162681	0.00127429	0.00121705	0.00130983	0.00135699	85	67	57	49	64.5	0.00084088	0.00122559	0.0011169	0.00146736	0.00116268	37	36	22	11	26.5
PIGT	gi|23397653|ref|NP_057021.2|:GPI transamidase component PIG-T isoform 1 precursor [Homo sapiens] ;gi|296080710|ref|NP_001171657.1|:GPI transamidase component PIG-T isoform 2 precursor [Homo sapiens] ;gi|296080714|ref|NP_001171659.1|:GPI transamidase component PIG-T isoform 4 precursor [Homo sapiens] ;	1.16619	0.49808	0.221808	0.302701	9.669e-05	0.00010809	0.00013483	6.752e-05	0.000101783	8	9	10	4	7.75	7.176e-05	0.00012899	6.412e-05	8.424e-05	8.72775e-05	5	6	2	1	3.5
KDSR	gi|4503817|ref|NP_002026.1|:3-ketodihydrosphingosine reductase precursor [Homo sapiens] ;gi|530414153|ref|XP_005266734.1|:PREDICTED: 3-ketodihydrosphingosine reductase isoform X1 [Homo sapiens] ;gi|578832425|ref|XP_006722496.1|:PREDICTED: 3-ketodihydrosphingosine reductase isoform X2 [Homo sapiens] ;	1.16413	0.212868	0.21925	0.67189	2.104e-05	6.273e-05	4.695e-05	0	4.35733e-05	1	3	2	0	1.5	0	3.743e-05	0	0	3.743e-05	0	1	0	0	0.25
AASS	alpha-aminoadipic semialdehyde synthase, mitochondrial [Homo sapiens]	1.16178	0.493961	0.216337	0.306308	0.00014334	7.497e-05	6.733e-05	2.107e-05	7.66775e-05	19	10	8	2	9.75	0.00012541	0	2.001e-05	5.258e-05	6.6e-05	14	0	1	1	4
MTHFD1	C-1-tetrahydrofolate synthase, cytoplasmic [Homo sapiens]	1.16167	0.488911	0.216196	0.31077	0.00023908	0.00037866	0.00044177	0.00028175	0.000335315	32	51	53	27	40.75	0.00015969	0.00034554	0.00033692	0.00031245	0.00028865	18	26	17	6	16.75
	gi|578834776|ref|XP_006723394.1|:PREDICTED: pleckstrin homology domain-containing family G member 2 isoform X6 [Homo sapiens] ;gi|578834778|ref|XP_006723395.1|:PREDICTED: pleckstrin homology domain-containing family G member 2 isoform X7 [Homo sapiens] ;gi|578834780|ref|XP_006723396.1|:PREDICTED: pleckstrin homology domain-containing family G member 2 isoform X8 [Homo sapiens] ;gi|578834782|ref|X…	1.15967	0.117792	0.213713	0.928883	1.491e-05	1.481e-05	1.109e-05	1.388e-05	1.36725e-05	3	3	2	2	2.5	5.9e-06	1.768e-05	0	0	1.179e-05	1	2	0	0	0.75
PRCP	gi|117306169|ref|NP_955450.2|:lysosomal Pro-X carboxypeptidase isoform 2 preproprotein [Homo sapiens] ;gi|4826940|ref|NP_005031.1|:lysosomal Pro-X carboxypeptidase isoform 1 preproprotein [Homo sapiens] ;gi|530396980|ref|XP_005274150.1|:PREDICTED: lysosomal Pro-X carboxypeptidase isoform X1 [Homo sapiens] ;	1.15909	0.721404	0.212998	0.141822	0.0001081	5.371e-05	0.00015074	3.774e-05	8.75725e-05	8	4	10	2	6	0.00011231	2.404e-05	7.168e-05	9.418e-05	7.55525e-05	7	1	2	1	2.75
ADCK3	PREDICTED: chaperone activity of bc1 complex-like, mitochondrial isoform X3 [Homo sapiens]	1.15676	0.373421	0.210084	0.427801	3.239e-05	0.00012875	0.0001325	9.048e-05	9.603e-05	3	12	11	6	8	3.846e-05	9.603e-05	0.00011456	0	8.30167e-05	3	5	4	0	3
TUFM	elongation factor Tu, mitochondrial precursor [Homo sapiens]	1.15527	0.234726	0.208224	0.629438	0.00211875	0.00154097	0.0013874	0.00147962	0.00163169	138	101	81	69	97.25	0.00138557	0.00144744	0.00142542	0.00139113	0.00141239	76	53	35	13	44.25
CAMK2G	gi|26051218|ref|NP_742081.1|:calcium/calmodulin-dependent protein kinase type II subunit beta isoform 8 [Homo sapiens] ;gi|26667191|ref|NP_001213.2|:calcium/calmodulin-dependent protein kinase type II subunit gamma isoform 4 [Homo sapiens] ;gi|530394452|ref|XP_005270259.1|:PREDICTED: calcium/calmodulin-dependent protein kinase type II subunit gamma isoform X8 [Homo sapiens] ;gi|578813643|ref|XP_0…	1.15479	0.399935	0.207634	0.39801	4.234e-05	2.104e-05	3.936e-05	9.86e-06	2.815e-05	3	1.5	2.5	0.5	1.875	1.676e-05	3.765e-05	1.872e-05	0	2.43767e-05	1	1.5	0.5	0	0.75
PURB	transcriptional activator protein Pur-beta [Homo sapiens]	1.15479	0.442793	0.207626	0.353799	4.478e-05	0.00028925	0.00027477	0.00012509	0.000183473	2	13	11	4	7.5	7.976e-05	0.00015931	0.00023757	0	0.00015888	3	4	4	0	2.75
TOR1A	torsin-1A precursor [Homo sapiens]	1.15363	0.198653	0.206175	0.701904	8.417e-05	4.182e-05	4.695e-05	0	5.76467e-05	4	2	2	0	2	4.997e-05	0	0	0	4.997e-05	2	0	0	0	0.5
CECR5	gi|14861834|ref|NP_149061.1|:cat eye syndrome critical region protein 5 isoform 2 precursor [Homo sapiens] ;gi|21914862|ref|NP_060299.4|:cat eye syndrome critical region protein 5 isoform 1 [Homo sapiens] ;	1.15264	0.165142	0.204946	0.782143	4.954e-05	4.923e-05	3.685e-05	0	4.52067e-05	3	3	2	0	2	3.922e-05	0	0	0	3.922e-05	2	0	0	0	0.5
ATP5C1	ATP synthase subunit gamma, mitochondrial isoform L (liver) precursor [Homo sapiens]	1.15189	0.446676	0.204008	0.350008	0.0017816	0.00114147	0.00146453	0.00137514	0.00144069	76	49	56	42	55.75	0.00086292	0.00154284	0.00161675	0.00098033	0.00125071	31	37	26	6	25
LRRC40	leucine-rich repeat-containing protein 40 [Homo sapiens]	1.15174	0.665998	0.203816	0.176527	0.00023208	0.00024216	0.00027186	0.00037277	0.000279718	20	21	21	23	21.25	0.00034448	0.00039219	0.00015391	8.088e-05	0.000242865	25	19	5	1	12.5
TUBG1	tubulin gamma-1 chain [Homo sapiens]	1.14925	0.661947	0.200692	0.179177	0.00061958	0.00058491	0.00067393	0.00021634	0.00052369	40	38	39	10	31.75	0.00062536	0.00030308	0.00024652	0.00064776	0.00045568	34	11	6	6	14.25
SNX4	sorting nexin-4 [Homo sapiens]	1.14638	0.276431	0.197084	0.558413	7.762e-05	6.171e-05	8.659e-05	0.00010841	8.35825e-05	5	4	5	5	4.75	5.53e-05	5.523e-05	0	0.0001082	7.291e-05	3	2	0	1	1.5
SEPT8	gi|149363638|ref|NP_001092282.1|:septin-8 isoform c [Homo sapiens] ;gi|149363661|ref|NP_055961.1|:septin-8 isoform b [Homo sapiens] ;gi|149363689|ref|NP_001092281.1|:septin-8 isoform a [Homo sapiens] ;gi|530379777|ref|XP_005271984.1|:PREDICTED: septin-8 isoform X1 [Homo sapiens] ;gi|530379779|ref|XP_005271985.1|:PREDICTED: septin-8 isoform X2 [Homo sapiens] ;gi|530379781|ref|XP_005271986.1|:PREDI…	1.1458	0.63732	0.196351	0.195642	0.00015805	0.00017276	0.00018109	0.00013245	0.000161087	10	11	10.2703	6	9.31757	0.00018767	0.00011245	4.192e-05	0.00022032	0.00014059	10	4	1	2	4.25
TM9SF2	transmembrane 9 superfamily member 2 precursor [Homo sapiens]	1.14491	0.531745	0.195234	0.274297	0.00014751	9.424e-05	0.00015281	0.00011773	0.000128072	14	9	13	8	11	0.0001126	9.371e-05	0.0001677	7.344e-05	0.000111863	9	5	6	1	5.25
ATP2A2	sarcoplasmic/endoplasmic reticulum calcium ATPase 2 isoform b [Homo sapiens]	1.1446	0.526105	0.194847	0.278928	0.00052292	0.00031312	0.00032909	0.00039327	0.0003896	78	47	44	42	52.75	0.00042192	0.00021465	0.00044459	0.00028036	0.00034038	53	18	25	6	25.5
YARS	tyrosine--tRNA ligase, cytoplasmic [Homo sapiens]	1.14403	0.562148	0.194121	0.250149	0.00026461	0.00034184	0.00039853	0.00031414	0.00032978	20	26	27	17	22.5	0.00040847	0.00023534	0.00014038	0.00036886	0.000288263	26	10	4	4	11
NUDCD2	nudC domain-containing protein 2 [Homo sapiens]	1.14365	0.213834	0.193647	0.669923	0.00013349	8.843e-05	4.964e-05	0	9.052e-05	3	2	1	0	1.5	0	7.915e-05	0	0	7.915e-05	0	1	0	0	0.25
RPS2	40S ribosomal protein S2 [Homo sapiens]	1.14337	0.231315	0.193291	0.635796	0.00259879	0.00203759	0.00297905	0.0028638	0.00261981	109	86	112	86	98.25	0.00206672	0.0021629	0.00227678	0.00265882	0.0022913	73	51	36	16	44
ARHGAP17	gi|530408396|ref|XP_005255471.1|:PREDICTED: rho GTPase-activating protein 17 isoform X2 [Homo sapiens] ;gi|54860079|ref|NP_001006635.1|:rho GTPase-activating protein 17 isoform 1 [Homo sapiens] ;gi|54860105|ref|NP_060524.4|:rho GTPase-activating protein 17 isoform 2 [Homo sapiens] ;gi|578828580|ref|XP_006721120.1|:PREDICTED: rho GTPase-activating protein 17 isoform X3 [Homo sapiens] ;gi|578828582…	1.14165	0.719395	0.191118	0.143033	5.821e-05	9.091e-05	5.567e-05	0.00011615	8.0235e-05	7	11	6	10	8.5	9.875e-05	4.438e-05	2.206e-05	0.00011593	7.028e-05	10	3	1	2	4
KIF11	kinesin-like protein KIF11 [Homo sapiens]	1.14024	0.334465	0.189333	0.475649	0.00091952	0.00094664	0.00073801	0.0007946	0.000849692	139	144	100	86	117.25	0.00091907	0.00076486	0.00078965	0.00050718	0.00074519	117	65	45	11	59.5
FAM115A	gi|332635045|ref|NP_001193867.1|:protein FAM115A isoform 2 [Homo sapiens] ;gi|578814797|ref|XP_006716254.1|:PREDICTED: protein FAM115A isoform X6 [Homo sapiens] ;gi|578814801|ref|XP_006716256.1|:PREDICTED: protein FAM115A isoform X8 [Homo sapiens] ;gi|7662276|ref|NP_055534.1|:protein FAM115A isoform 1 [Homo sapiens] ;	1.13908	0.264459	0.187871	0.577641	5.321e-05	6.798e-05	3.392e-05	6.37e-05	5.47025e-05	7	9	4	6	6.5	6.318e-05	4.056e-05	4.033e-05	0	4.80233e-05	7	3	2	0	3
GAPDH	glyceraldehyde-3-phosphate dehydrogenase isoform 1 [Homo sapiens]	1.13709	0.780966	0.185342	0.107368	2.085e-05	0.00045589	0.00060486	0.00029125	0.000343213	1	22	26	10	14.75	0.00012381	0.00037093	0.00027657	0.00043603	0.000301835	5	10	5	3	5.75
TBRG4	gi|387912543|ref|NP_001248763.1|:protein TBRG4 isoform 3 [Homo sapiens] ;gi|40217812|ref|NP_004740.2|:protein TBRG4 isoform 1 [Homo sapiens] ;	1.1369	0.366143	0.185105	0.436349	9.793e-05	0.00014057	0.00012139	3.04e-05	9.75725e-05	9	13	10	2	8.5	6.46e-05	7.742e-05	0.00011545	0	8.58233e-05	5	4	4	0	3.25
CAND1	cullin-associated NEDD8-dissociated protein 1 [Homo sapiens]	1.1365	0.435573	0.184599	0.360939	0.00030101	0.00023704	0.00024711	0.00016658	0.000237935	53	42	39	21	38.75	0.00019558	0.00024246	0.00024105	0.00015834	0.000209358	29	24	16	4	18.25
PXN	gi|530401367|ref|XP_005253967.1|:PREDICTED: paxillin isoform X1 [Homo sapiens] ;gi|578824057|ref|XP_006719594.1|:PREDICTED: paxillin isoform X10 [Homo sapiens] ;gi|578824059|ref|XP_006719595.1|:PREDICTED: paxillin isoform X11 [Homo sapiens] ;gi|578824061|ref|XP_006719596.1|:PREDICTED: paxillin isoform X12 [Homo sapiens] ;gi|578824072|ref|XP_006719601.1|:PREDICTED: paxillin isoform X17 [Homo sapie…	1.13583	0.814613	0.183742	0.0890489	3.856e-05	5.109e-05	5.736e-05	0	4.90033e-05	6	8	8	0	5.5	6.105e-05	3.429e-05	3.409e-05	0	4.31433e-05	8	3	2	0	3.25
PCNT	gi|530419244|ref|XP_005261181.1|:PREDICTED: pericentrin isoform X1 [Homo sapiens] ;gi|530419246|ref|XP_005261182.1|:PREDICTED: pericentrin isoform X2 [Homo sapiens] ;gi|530419248|ref|XP_005261183.1|:PREDICTED: pericentrin isoform X3 [Homo sapiens] ;gi|530419252|ref|XP_005261185.1|:PREDICTED: pericentrin isoform X5 [Homo sapiens] ;gi|530419254|ref|XP_005261186.1|:PREDICTED: pericentrin isoform X6 …	1.13424	0.215539	0.18172	0.666475	3.339e-05	4.356e-05	3.958e-05	3.207e-05	3.715e-05	16	21	17	11	16.25	2.974e-05	4.084e-05	2.768e-05	0	3.27533e-05	12	11	5	0	7
DDX1	ATP-dependent RNA helicase DDX1 [Homo sapiens]	1.13417	0.69871	0.181634	0.155703	0.00066081	0.00044091	0.00051605	0.00030326	0.000480258	70	47	49	23	47.25	0.00075105	0.0004198	0.00032554	0.00019739	0.000423445	67	25	13	3	27
HSPH1	gi|42544159|ref|NP_006635.2|:heat shock protein 105 kDa isoform 1 [Homo sapiens] ;gi|530402054|ref|XP_005266293.1|:PREDICTED: heat shock protein 105 kDa isoform X2 [Homo sapiens] ;gi|557357685|ref|NP_001273432.1|:heat shock protein 105 kDa isoform 2 [Homo sapiens] ;gi|557357733|ref|NP_001273433.1|:heat shock protein 105 kDa isoform 3 [Homo sapiens] ;gi|578824728|ref|XP_006719820.1|:PREDICTED: hea…	1.13373	0.0617783	0.181081	1.20916	0.0001547	0.00013712	0.00013284	0.00014783	0.000143122	19	16.9474	14.625	13	15.8931	0.00013535	0.00013517	0.00012094	0.0001135	0.00012624	14	9.33333	5.6	2	7.73333
XRCC5	gi|10863945|ref|NP_066964.1|:X-ray repair cross-complementing protein 5 [Homo sapiens] ;gi|530370925|ref|XP_005246893.1|:PREDICTED: X-ray repair cross-complementing protein 5 isoform X1 [Homo sapiens] ;	1.13185	0.752708	0.178682	0.123374	0.00014315	0.00050263	0.00037264	0.0004132	0.000357905	15	53	35	31	33.5	0.00060061	0.00027161	0.00012657	0.00026606	0.000316212	53	16	5	4	19.5
C1orf123	UPF0587 protein C1orf123 [Homo sapiens]	1.13109	0.434216	0.17771	0.362294	0.00034929	0.00043388	0.00034096	0.00024392	0.000342012	8	10	7	4	7.25	0.00036291	0.00031065	0.00023163	0.00030431	0.000302375	7	4	2	1	3.5
WIPI2	gi|54111428|ref|NP_057087.2|:WD repeat domain phosphoinositide-interacting protein 2 isoform b [Homo sapiens] ;gi|578813401|ref|XP_006715748.1|:PREDICTED: WD repeat domain phosphoinositide-interacting protein 2 isoform X1 [Homo sapiens] ;gi|75677329|ref|NP_001028690.1|:WD repeat domain phosphoinositide-interacting protein 2 isoform c [Homo sapiens] ;gi|75677331|ref|NP_001028691.1|:WD repeat domai…	1.12874	0.645798	0.174719	0.189903	0.00011216	0.00019106	0.000143	0.00022378	0.0001675	7	12	8	10	9.25	0.00017123	0.000114	8.5e-05	0.00022335	0.000148395	9	4	2	2	4.25
	gi|578811233|ref|XP_006714978.1|:PREDICTED: beta-synuclein isoform X2 [Homo sapiens] ;gi|578811235|ref|XP_006714979.1|:PREDICTED: beta-synuclein isoform X3 [Homo sapiens] ;	1.12779	0.217044	0.173496	0.663453	0	4.567e-05	0.00010254	0.00012838	9.21967e-05	0	1	2	2	1.25	0	8.175e-05	0	0	8.175e-05	0	1	0	0	0.25
DCDC2	doublecortin domain-containing protein 2 [Homo sapiens]	1.12767	0.217103	0.173339	0.663334	0	1.458e-05	3.275e-05	4.1e-05	2.94433e-05	0	1	2	2	1.25	0	2.611e-05	0	0	2.611e-05	0	1	0	0	0.25
IFIT5	interferon-induced protein with tetratricopeptide repeats 5 [Homo sapiens]	1.12616	0.0365205	0.171417	1.43746	1.449e-05	2.881e-05	3.234e-05	4.049e-05	2.90325e-05	1	2	2	2	1.75	0	2.578e-05	0	0	2.578e-05	0	1	0	0	0.25
BCAR1	gi|282398114|ref|NP_001164186.1|:breast cancer anti-estrogen resistance protein 1 isoform 2 [Homo sapiens] ;gi|282398116|ref|NP_001164187.1|:breast cancer anti-estrogen resistance protein 1 isoform 3 [Homo sapiens] ;gi|282398118|ref|NP_001164188.1|:breast cancer anti-estrogen resistance protein 1 isoform 4 [Homo sapiens] ;gi|282398120|ref|NP_001164189.1|:breast cancer anti-estrogen resistance pro…	1.12544	0.266263	0.17049	0.57469	3.147e-05	0.00015635	0.00014042	0.0001758	0.00012601	4	20	16	16	14	2.802e-05	0.00019591	0	0	0.000111965	3	14	0	0	4.25
EIF3F	eukaryotic translation initiation factor 3 subunit F [Homo sapiens]	1.12537	0.543758	0.170396	0.264594	0.00025438	0.0004278	0.00028379	0.00035529	0.000330315	13	22	13	13	15.25	0.00027883	0.00027846	0.00020762	0.00040916	0.000293517	12	8	4	3	6.75
SMC3	structural maintenance of chromosomes protein 3 [Homo sapiens]	1.12322	0.403897	0.167635	0.39373	0.00024109	0.00034796	0.0003394	0.00030465	0.000308275	42	61	53	38	48.5	0.0002113	0.00032673	0.00031975	0.00024005	0.000274458	31	32	21	6	22.5
DNA2	gi|320461728|ref|NP_001073918.2|:DNA replication ATP-dependent helicase/nuclease DNA2 [Homo sapiens] ;gi|578819047|ref|XP_006717743.1|:PREDICTED: DNA replication ATP-dependent helicase/nuclease DNA2 isoform X1 [Homo sapiens] ;	1.12287	0.531901	0.167187	0.274169	1.977e-05	6.55e-06	0	0	1.316e-05	3	1	0	0	1	0	1.172e-05	0	0	1.172e-05	0	1	0	0	0.25
RPL5	60S ribosomal protein L5 [Homo sapiens]	1.12269	0.394051	0.166965	0.404448	0.00150534	0.00093495	0.00118082	0.0011498	0.00119273	64	40	45	35	46	0.00128477	0.00092045	0.00106067	0.00098363	0.00106238	46	22	17	6	22.75
HBS1L	HBS1-like protein isoform 1 [Homo sapiens]	1.11982	0.785906	0.163267	0.104629	0.00019745	0.00032421	0.00031074	1.751e-05	0.000212477	19.3333	31.9444	27.2727	1.22727	19.9444	0.00025148	0.0001107	0.00025442	0.00014237	0.000189742	20.7363	6.09375	9.3913	2	9.55533
FARSA	phenylalanine--tRNA ligase alpha subunit [Homo sapiens]	1.11922	0.216607	0.162497	0.664328	0.00024753	0.00028697	0.00030683	0.0002881	0.000282358	18	21	20	15	18.5	0.00019595	0.00026907	0.00029182	0	0.00025228	12	11	8	0	7.75
NXN	nucleoredoxin isoform 1 [Homo sapiens]	1.11884	0.11392	0.162001	0.9434	3.212e-05	9.575e-05	1.792e-05	4.486e-05	4.76625e-05	2	6	1	2	2.75	0	0	4.26e-05	0	4.26e-05	0	0	1	0	0.25
PFKM	gi|530400466|ref|XP_005269033.1|:PREDICTED: 6-phosphofructokinase, muscle type isoform X3 [Homo sapiens] ;gi|530400472|ref|XP_005269036.1|:PREDICTED: 6-phosphofructokinase, muscle type isoform X6 [Homo sapiens] ;gi|530400474|ref|XP_005269037.1|:PREDICTED: 6-phosphofructokinase, muscle type isoform X7 [Homo sapiens] ;gi|578823895|ref|XP_006719527.1|:PREDICTED: 6-phosphofructokinase, muscle type is…	1.11755	0.550775	0.160344	0.259025	0.00016851	0.00026866	0.00022914	0.00019329	0.0002149	21.3	34.1729	25.9615	17.4928	24.7318	0.0002422	0.00011258	0.00019384	0.00022056	0.000192295	25.7812	8	9.23684	4	11.7545
LGMN	gi|530404198|ref|XP_005267919.1|:PREDICTED: legumain isoform X1 [Homo sapiens] ;gi|530404200|ref|XP_005267920.1|:PREDICTED: legumain isoform X2 [Homo sapiens] ;gi|56682964|ref|NP_001008530.1|:legumain preproprotein [Homo sapiens] ;	1.1174	0.940143	0.160143	0.0268061	0	3.693e-05	0	0	3.693e-05	0	2	0	0	0.5	0	3.305e-05	0	0	3.305e-05	0	1	0	0	0.25
PANK4	pantothenate kinase 4 [Homo sapiens]	1.11726	0.940208	0.159969	0.0267762	0	3.592e-05	0	0	3.592e-05	0	4	0	0	1	0	3.215e-05	0	0	3.215e-05	0	2	0	0	0.5
GSR	gi|305410789|ref|NP_001182031.1|:glutathione reductase, mitochondrial isoform 2 precursor [Homo sapiens] ;gi|305410791|ref|NP_001182032.1|:glutathione reductase, mitochondrial isoform 3 precursor [Homo sapiens] ;gi|305410793|ref|NP_001182033.1|:glutathione reductase, mitochondrial isoform 4 precursor [Homo sapiens] ;gi|50301238|ref|NP_000628.2|:glutathione reductase, mitochondrial isoform 1 precu…	1.11702	0.940325	0.159651	0.0267218	0	2.816e-05	0	0	2.816e-05	0	2	0	0	0.5	0	2.521e-05	0	0	2.521e-05	0	1	0	0	0.25
SLC16A1	monocarboxylate transporter 1 [Homo sapiens]	1.11688	0.521564	0.159474	0.282693	0.0003912	0.00011107	0.00015587	0.00015611	0.000203562	28	8	10	8	13.5	0.0003484	0.00012426	7.412e-05	0	0.00018226	21	5	2	0	7
MCM3	DNA replication licensing factor MCM3 isoform 1 [Homo sapiens]	1.11572	0.719859	0.157978	0.142753	0.00026207	0.0003174	0.00031978	0.00025164	0.000287722	32	39	35	22	32	0.00046679	0.00027678	0.00017379	0.00011416	0.00025788	48	19	8	2	19.25
HSPD1	PREDICTED: 60 kDa heat shock protein, mitochondrial isoform X1 [Homo sapiens]	1.11434	0.578994	0.156195	0.237326	0.00056081	0.00072691	0.00080246	0.00059597	0.000671537	46	60	59	35	50	0.00030401	0.00065058	0.00077614	0.00067979	0.00060263	21	30	24	8	20.75
C16orf70	gi|530424382|ref|XP_005256235.1|:PREDICTED: UPF0183 protein C16orf70 isoform X2 [Homo sapiens] ;gi|578829239|ref|XP_006721347.1|:PREDICTED: UPF0183 protein C16orf70 isoform X3 [Homo sapiens] ;	1.1124	0.541284	0.153679	0.266575	0.00052972	0.00074026	0.00055403	0.00053177	0.000588945	32	45	30	23	32.5	0.00053073	0.0003239	0.00057084	0.00069227	0.000529435	27	11	13	6	14.25
SNRPD3	small nuclear ribonucleoprotein Sm D3 [Homo sapiens]	1.11141	0.553652	0.15239	0.256763	5.544e-05	0.00060605	0.00024741	0.00023231	0.000285303	1	11	4	3	4.75	0.00013167	0.00019724	0.0004412	0	0.000256703	2	2	3	0	1.75
ATP2B1	gi|48255945|ref|NP_001673.2|:plasma membrane calcium-transporting ATPase 1 isoform 1b [Homo sapiens] ;gi|530400348|ref|XP_005268976.1|:PREDICTED: plasma membrane calcium-transporting ATPase 1 isoform X2 [Homo sapiens] ;	1.11002	0.753325	0.150584	0.123018	5.153e-05	2.276e-05	3.833e-05	2.399e-05	3.41525e-05	9	4	6	3	5.5	4.76e-05	2.037e-05	1.519e-05	3.991e-05	3.07675e-05	7	2	1	1	2.75
RPS27	40S ribosomal protein S27 [Homo sapiens]	1.10931	0.589347	0.149666	0.229629	0.00243946	0.00165286	0.00120612	0.0018391	0.00178438	29.3333	20	13	15.8333	19.5417	0.00188287	0.00170941	0.001103	0.00173892	0.00160855	19.0667	11.5556	5	3	9.65556
SLC25A13	gi|237649019|ref|NP_001153682.1|:calcium-binding mitochondrial carrier protein Aralar2 isoform 1 [Homo sapiens] ;gi|578813862|ref|XP_006715893.1|:PREDICTED: calcium-binding mitochondrial carrier protein Aralar2 isoform X1 [Homo sapiens] ;gi|578813864|ref|XP_006715894.1|:PREDICTED: calcium-binding mitochondrial carrier protein Aralar2 isoform X2 [Homo sapiens] ;gi|7657581|ref|NP_055066.1|:calcium-…	1.10693	0.647678	0.146567	0.188641	0.000618	0.00077321	0.00053032	0.00050284	0.000606092	59.8033	75.2941	46	34.8387	53.984	0.00069521	0.00051086	0.00026384	0.00072026	0.000547542	56.6552	27.7917	9.625	10	26.018
DPM1	gi|4503363|ref|NP_003850.1|:dolichol-phosphate mannosyltransferase [Homo sapiens] ;gi|530418498|ref|XP_005260657.1|:PREDICTED: dolichol-phosphate mannosyltransferase isoform X1 [Homo sapiens] ;	1.10447	0.716914	0.143356	0.144533	0.00026868	0.0006141	0.00047959	0.00060043	0.0004907	10	23	16	16	16.25	0.00028714	0.00028676	0.00064144	0.0005618	0.000444285	9	6	9	3	6.75
TES	testin isoform 1 [Homo sapiens]	1.10297	0.809758	0.141391	0.0916448	0.00021571	0.00028032	0.0003147	9.27e-05	0.000225858	13	17	17	4	12.75	0.00029555	8.855e-05	8.803e-05	0.00034696	0.000204772	15	3	2	3	5.75
STT3A	dolichyl-diphosphooligosaccharide--protein glycosyltransferase subunit STT3A isoform a [Homo sapiens]	1.10129	0.739532	0.139196	0.131043	7.927e-05	0.00017724	0.00015476	0.00011072	0.000130497	8	18	14	8	12	0.0001059	0.00019388	0.00010514	6.906e-05	0.000118495	9	11	4	1	6.25
	cytoplasmic FMR1-interacting protein 1 isoform a [Homo sapiens]	1.09841	0.816552	0.135413	0.088016	2.788e-05	9.498e-05	7.351e-05	0.00014016	8.41325e-05	5	17.1429	11.8182	18	12.9903	1.821e-05	0.000102	0.00010845	7.772e-05	7.6595e-05	2.75	10.2857	7.33333	2	5.59226
NANP	N-acylneuraminate-9-phosphatase [Homo sapiens]	1.09826	0.52236	0.135225	0.28203	0.00014084	0.0003639	0.00018855	3.934e-05	0.000183158	5	13	6	1	6.25	0.00010034	0.00025053	0.00014944	0	0.00016677	3	5	2	0	2.5
MACF1	gi|530362268|ref|XP_005270751.1|:PREDICTED: microtubule-actin cross-linking factor 1 isoform X1 [Homo sapiens] ;gi|530362272|ref|XP_005270753.1|:PREDICTED: microtubule-actin cross-linking factor 1 isoform X3 [Homo sapiens] ;gi|530362276|ref|XP_005270755.1|:PREDICTED: microtubule-actin cross-linking factor 1 isoform X5 [Homo sapiens] ;gi|578798800|ref|XP_006710584.1|:PREDICTED: microtubule-actin c…	1.09784	0.638669	0.13467	0.194724	0.00010764	0.00010697	7.568e-05	5.306e-05	8.58375e-05	119	119	75	42	88.75	9.559e-05	7.884e-05	8.158e-05	5.674e-05	7.81875e-05	89	49	34	9	45.25
	gi|578836504|ref|XP_006724051.1|:PREDICTED: trifunctional purine biosynthetic protein adenosine-3 isoform X2 [Homo sapiens] ;gi|578836508|ref|XP_006724053.1|:PREDICTED: trifunctional purine biosynthetic protein adenosine-3 isoform X4 [Homo sapiens] ;	1.09694	0.0941619	0.133487	1.02612	0.00141621	0.00134645	0.00121535	0.00123626	0.00130357	208	199	160	130	174.25	0.00120466	0.00121112	0.0012462	0.00109148	0.00118837	149	100	69	23	85.25
RPL10	60S ribosomal protein L10 isoform a [Homo sapiens]	1.09573	0.706289	0.131897	0.151018	0.00107724	0.00155709	0.00094686	0.00150457	0.00127144	33	48	26	33	35	0.00162802	0.00052259	0.00112568	0.00136513	0.00116036	42	9	13	6	17.5
PHKA1	gi|169881273|ref|NP_002628.2|:phosphorylase b kinase regulatory subunit alpha, skeletal muscle isoform isoform 1 [Homo sapiens] ;gi|169881275|ref|NP_001116142.1|:phosphorylase b kinase regulatory subunit alpha, skeletal muscle isoform isoform 2 [Homo sapiens] ;	1.0956	0.691499	0.13172	0.160209	3.427e-05	2.838e-05	3.823e-05	0	3.36267e-05	6	5	6	0	4.25	5.426e-05	1.355e-05	1.515e-05	3.981e-05	3.06925e-05	8	1.33333	1	1	2.83333
MYL6	gi|17986258|ref|NP_066299.2|:myosin light polypeptide 6 isoform 1 [Homo sapiens] ;gi|88999583|ref|NP_524147.2|:myosin light polypeptide 6 isoform 2 [Homo sapiens] ;	1.09404	0.477971	0.12967	0.320599	0.00167983	0.00144286	0.00160858	0.00122769	0.00148974	36.3103	31.3846	31.1667	19	29.4654	0.00104376	0.00156355	0.00122718	0.00161224	0.00136168	19	19	10	5	13.25
LARS	leucine--tRNA ligase, cytoplasmic [Homo sapiens]	1.09222	0.674354	0.127258	0.171112	0.00023761	0.00024203	0.00018556	0.00012445	0.000197413	40	41	28	15	31	0.00012697	0.0001585	0.00018909	0.00024842	0.000180745	18	15	12	6	12.75
MYO1B	gi|44889481|ref|NP_036355.2|:unconventional myosin-Ib isoform 2 [Homo sapiens] ;gi|530370381|ref|XP_005246626.1|:PREDICTED: unconventional myosin-Ib isoform X2 [Homo sapiens] ;gi|530370393|ref|XP_005246632.1|:PREDICTED: unconventional myosin-Ib isoform X8 [Homo sapiens] ;gi|530370397|ref|XP_005246634.1|:PREDICTED: unconventional myosin-Ib isoform X10 [Homo sapiens] ;gi|578804357|ref|XP_006712599.…	1.09005	0.666158	0.124392	0.176423	0.00021385	0.00019319	0.00022411	0.00015387	0.000196255	33	30	31	17	27.75	0.00026932	0.00014985	0.00012033	0.00018067	0.000180042	35	13	7	4	14.75
KLHL22	gi|24432026|ref|NP_116164.2|:kelch-like protein 22 [Homo sapiens] ;gi|578837449|ref|XP_006724405.1|:PREDICTED: kelch-like protein 22 isoform X1 [Homo sapiens] ;gi|578837451|ref|XP_006724406.1|:PREDICTED: kelch-like protein 22 isoform X2 [Homo sapiens] ;	1.08935	0.926812	0.123469	0.0330084	1.102e-05	0	2.458e-05	0	1.78e-05	1	0	2	0	0.75	1.308e-05	1.96e-05	0	0	1.634e-05	1	1	0	0	0.5
MYH9	myosin-9 [Homo sapiens]	1.08763	0.492279	0.121183	0.307789	0.00186897	0.00146357	0.00117892	0.00144227	0.00148843	524.38	413.222	296.492	289.727	380.955	0.0013306	0.00124872	0.00160749	0.00128725	0.00136852	314.397	196.963	170.027	51.8182	183.301
SLC1A5	neutral amino acid transporter B(0) isoform 1 [Homo sapiens]	1.08693	0.59289	0.120263	0.227026	0.00011621	0.00015398	0.00015846	0.00012624	0.000138723	9	12	11	7	9.75	0.00016866	0.00011484	0.00013701	9e-05	0.000127628	11	5	4	1	5.25
UQCRC1	cytochrome b-c1 complex subunit 1, mitochondrial precursor [Homo sapiens]	1.08633	0.659514	0.119468	0.180776	0.00033473	0.00030371	0.00040591	0.00034556	0.000347477	23	21	25	17	21.5	0.00024194	0.0002071	0.00042466	0.00040575	0.000319863	14	8	11	4	9.25
NHLRC2	NHL repeat-containing protein 2 [Homo sapiens]	1.08451	0.894865	0.117044	0.0482424	8.66e-05	5.737e-05	3.22e-05	4.032e-05	5.41225e-05	9	6	3	3	5.25	2.285e-05	1.712e-05	2.552e-05	0.00013413	4.9905e-05	2	1	1	2	1.5
RPL24	60S ribosomal protein L24 [Homo sapiens]	1.08447	0.57414	0.116991	0.240982	0.00115687	0.00163602	0.00124099	0.00167794	0.00142796	26	37	25	27	28.75	0.00142656	0.0013455	0.00094423	0.00155063	0.00131673	27	17	8	5	14.25
RPL27	60S ribosomal protein L27 [Homo sapiens]	1.08209	0.469292	0.113814	0.328557	0.00061639	0.00040835	0.00040113	0.00028697	0.00042821	12	8	7	4	7.75	0.00073193	0.00018274	0.00027251	0	0.000395727	12	2	2	0	4
EEF1A1	elongation factor 1-alpha 1 [Homo sapiens]	1.08153	0.54518	0.113072	0.26346	0.00598119	0.00777331	0.00865806	0.0103559	0.00819211	395.565	517.324	513.256	490.362	479.127	0.00795292	0.00678584	0.00818228	0.00737722	0.00757457	442.938	252.296	204	70	242.309
RPL38	60S ribosomal protein L38 [Homo sapiens]	1.0805	0.349817	0.111696	0.456159	0.00169654	0.00128923	0.00189269	0.00125446	0.00153323	17	13	17	9	14	0.00213304	0.00106509	0.00105888	0	0.001419	18	6	4	0	7
ATP5L	ATP synthase subunit g, mitochondrial [Homo sapiens]	1.08016	0.20802	0.111245	0.681894	0.0006104	0.00026959	0.00022699	0.00028418	0.00034779	9	4	3	3	4.75	0.00040268	0.00024128	0	0	0.00032198	5	2	0	0	1.75
DHX57	putative ATP-dependent RNA helicase DHX57 [Homo sapiens]	1.07948	0.0357065	0.110334	1.44725	7.426e-05	0	0	0	7.426e-05	14.7333	0	0	0	3.68333	6.654e-05	6.604e-05	7.157e-05	7.102e-05	6.87925e-05	11.1176	7.36585	5.35285	2.02174	6.46452
EIF4G3	eukaryotic translation initiation factor 4 gamma 3 isoform 1 [Homo sapiens]	1.07924	0.619733	0.110012	0.207795	0.00142956	0.00107876	0.00101005	0.00118965	0.00117701	331.721	251.897	210.086	197.647	247.838	0.00125676	0.00116844	0.00125382	0.00068334	0.00109059	245.589	152.424	109.682	22.75	132.611
CDK5	gi|256542306|ref|NP_001157882.1|:cyclin-dependent kinase 5 isoform 2 [Homo sapiens] ;gi|4826675|ref|NP_004926.1|:cyclin-dependent kinase 5 isoform 1 [Homo sapiens] ;	1.07883	0.523461	0.109473	0.281116	2.687e-05	0.0001335	0.00020982	0.00015011	0.000130075	1	5	7	4	4.25	3.19e-05	0	0.00014254	0.00018727	0.00012057	1	0	2	1	1
NAMPT	PREDICTED: nicotinamide phosphoribosyltransferase isoform X1 [Homo sapiens]	1.07732	0.775211	0.107445	0.11058	0.00078252	0.00065037	0.0006349	0.00033782	0.000601402	55	46	40	17	39.5	0.00082783	0.00060739	0.00030192	0.00049582	0.00055824	49	24	8	5	21.5
PDCD5	programmed cell death protein 5 [Homo sapiens]	1.07703	0.666214	0.107055	0.176386	0.00050297	0.0006109	0.00074817	0.00062444	0.00062162	9	11	12	8	10	0.00053089	0.00079527	0.00059297	0.00038952	0.000577163	8	8	4	1	5.25
MLF2	myeloid leukemia factor 2 [Homo sapiens]	1.07658	0.761399	0.106455	0.118388	0.00016901	0.00022394	0.00018855	7.868e-05	0.000165045	6	8	6	2	5.5	0.00016724	0.00010021	0.00014944	0.00019633	0.000153305	5	2	2	1	2.5
MRE11A	PREDICTED: double-strand break repair protein MRE11A isoform X2 [Homo sapiens]	1.07651	0.790381	0.106355	0.102163	0.00051308	0.00068636	0.00127689	0.00085442	0.000832687	52	70	116	62	75	0.00077328	0.00107061	0.00083753	0.00041262	0.00077351	66	61	32	6	41.25
GTPBP4	nucleolar GTP-binding protein 1 [Homo sapiens]	1.07304	0.782222	0.101699	0.10667	0.00026444	0.00025184	0.0001598	0.00010773	0.000195953	24	23	13	7	16.75	0.00015701	0.0001568	0.00026305	0.0001536	0.000182615	12	8	9	2	7.75
PUS1	gi|70166634|ref|NP_001002020.1|:tRNA pseudouridine synthase A, mitochondrial isoform 2 [Homo sapiens] ;gi|70166645|ref|NP_079491.2|:tRNA pseudouridine synthase A, mitochondrial isoform 1 [Homo sapiens] ;	1.07162	0.350556	0.0997977	0.455242	0.00017508	0.00031317	0.00025392	0.00014672	0.000222222	10	18	13	6	11.75	0.00024948	0.00018686	0.00018577	0	0.00020737	12	6	4	0	5.5
UCKL1	gi|301129207|ref|NP_001180308.1|:uridine-cytidine kinase-like 1 isoform 2 [Homo sapiens] ;gi|530418704|ref|XP_005260273.1|:PREDICTED: uridine-cytidine kinase-like 1 isoform X1 [Homo sapiens] ;gi|57863312|ref|NP_060329.2|:uridine-cytidine kinase-like 1 isoform 1 [Homo sapiens] ;gi|578836024|ref|XP_006723869.1|:PREDICTED: uridine-cytidine kinase-like 1 isoform X7 [Homo sapiens] ;gi|578836026|ref|XP…	1.0703	0.511314	0.0980095	0.291312	2.621e-05	6.512e-05	5.849e-05	0	4.994e-05	2	5	4	0	2.75	4.669e-05	4.663e-05	0	0	4.666e-05	3	2	0	0	1.25
RARS	arginine--tRNA ligase, cytoplasmic [Homo sapiens]	1.06482	0.733879	0.0906163	0.134375	0.00025403	0.00035762	0.00027159	0.00019218	0.000268855	24	34	23	13	23.5	0.00030164	0.00024476	0.00016846	0.00029509	0.000252488	24	13	6	4	11.75
GRAMD1A	gi|209969686|ref|NP_001129671.1|:GRAM domain-containing protein 1A isoform 2 [Homo sapiens] ;gi|92110010|ref|NP_065946.2|:GRAM domain-containing protein 1A isoform 1 [Homo sapiens] ;	1.06388	0.871348	0.0893384	0.0598081	9.798e-05	0.00018499	0.00026233	0.00013684	0.000170535	10	19	24	10	15.75	0.00015124	3.486e-05	0.00018193	0.00027315	0.000160295	13	2	7	4	6.5
GSPT1	gi|194018520|ref|NP_002085.2|:eukaryotic peptide chain release factor GTP-binding subunit ERF3A isoform 1 [Homo sapiens] ;gi|194097354|ref|NP_001123478.1|:eukaryotic peptide chain release factor GTP-binding subunit ERF3A isoform 2 [Homo sapiens] ;	1.06306	0.813122	0.0882215	0.0898443	0.00030707	0.00019616	0.00036704	0.00013785	0.00025203	28	18	30	9	21.25	0.00015627	0.00025359	0.00023272	0.00030574	0.00023708	12	13	8	4	9.25
HSP90AA1	gi|153792590|ref|NP_001017963.2|:heat shock protein HSP 90-alpha isoform 1 [Homo sapiens] ;gi|154146191|ref|NP_005339.3|:heat shock protein HSP 90-alpha isoform 2 [Homo sapiens] ;	1.06266	0.458558	0.087675	0.338605	0.00047964	0.00041083	0.00038552	0.00038559	0.000415395	58.635	50.5395	42.2447	33.75	46.2923	0.00035615	0.00040346	0.00044637	0.00035763	0.000390902	36.6667	27.7282	20.5714	6.27273	22.8097
NACA	gi|333033787|ref|NP_001106674.2|:nascent polypeptide-associated complex subunit alpha isoform a [Homo sapiens] ;gi|578823768|ref|XP_006719478.1|:PREDICTED: nascent polypeptide-associated complex subunit alpha isoform X4 [Homo sapiens] ;gi|578823780|ref|XP_006719484.1|:PREDICTED: nascent polypeptide-associated complex subunit alpha isoform X10 [Homo sapiens] ;	1.06121	0.842753	0.085711	0.0742997	0.00050599	0.00024016	0.00026118	0.0002848	0.000323033	67	32	31	27	39.25	0.00021523	0.00018807	0.00034056	0.00047374	0.0003044	24	14	17	9	16
RPL4	60S ribosomal protein L4 [Homo sapiens]	1.06086	0.766843	0.0852336	0.115293	0.00047444	0.0005365	0.0005293	0.0007769	0.000579285	29	33	29	34	31.25	0.00042739	0.00037831	0.00069435	0.00068416	0.000546052	22	13	16	6	14.25
ABL2	gi|269847776|ref|NP_001161708.1|:Abelson tyrosine-protein kinase 2 isoform f [Homo sapiens] ;gi|269847781|ref|NP_001161709.1|:Abelson tyrosine-protein kinase 2 isoform g [Homo sapiens] ;gi|269847786|ref|NP_001161710.1|:Abelson tyrosine-protein kinase 2 isoform h [Homo sapiens] ;gi|6382062|ref|NP_009298.1|:Abelson tyrosine-protein kinase 2 isoform b [Homo sapiens] ;	1.06065	0.585175	0.0849536	0.232714	3.61e-05	0.00013155	7.384e-05	8.4e-06	6.24725e-05	6	22	11	1	10	5.001e-05	4.281e-05	0	8.388e-05	5.89e-05	7	4	0	2	3.25
GTPBP1	GTP-binding protein 1 [Homo sapiens]	1.059	0.871257	0.0827053	0.0598535	0.00020884	0.00016603	0.00010484	0.00013126	0.000152743	20	16	9	9	13.5	0.00027279	9.287e-05	0.00013849	7.278e-05	0.000144233	22	5	5	1	8.25
GNB2L1	guanine nucleotide-binding protein subunit beta-2-like 1 [Homo sapiens]	1.05899	0.690237	0.0826939	0.161002	0.00370222	0.00308777	0.00280268	0.00286244	0.00311378	168	141	114	93	129	0.00204108	0.00321432	0.00374116	0.00276471	0.00294032	78	82	64	18	60.5
RPS14	40S ribosomal protein S14 [Homo sapiens]	1.05724	0.694278	0.0803054	0.158467	0.00277579	0.00225271	0.00196126	0.00264923	0.00240975	60	49	38	41	47	0.00203259	0.00172813	0.00245436	0.00290203	0.00227928	37	21	20	9	21.75
TWF1	gi|334724463|ref|NP_002813.3|:twinfilin-1 isoform 2 [Homo sapiens] ;gi|334848198|ref|NP_001229326.1|:twinfilin-1 isoform 1 [Homo sapiens] ;	1.05642	0.919343	0.0791831	0.0365225	0.00013971	0.00011901	0.0002004	0	0.00015304	7	6	9	0	5.5	0.0001896	0	0.00010589	0.00013911	0.000144867	8	0	2	1	2.75
SFXN1	sideroflexin-1 [Homo sapiens]	1.05426	0.886946	0.0762286	0.0521026	0.00062915	0.00034494	0.00041145	0.00048482	0.00046759	29	16	17	16	19.5	0.00087589	0.00019295	0.00040284	0.00030242	0.000443525	34	5	7	2	12
MEMO1	gi|212286159|ref|NP_001131074.1|:protein MEMO1 isoform 2 [Homo sapiens] ;gi|530367664|ref|XP_005264408.1|:PREDICTED: protein MEMO1 isoform X1 [Homo sapiens] ;	1.0532	0.0567041	0.0747758	1.24639	5.099e-05	7.601e-05	2.844e-05	3.561e-05	4.77625e-05	2	3	1	1	1.75	0	4.535e-05	0	0	4.535e-05	0	1	0	0	0.25
PIN4	peptidyl-prolyl cis-trans isomerase NIMA-interacting 4 isoform 1 [Homo sapiens]	1.05263	0.0678062	0.0740023	1.16873	4.478e-05	0.000178	9.992e-05	0.00012509	0.000111947	1	4	2	2	2.25	0.00010635	0	0	0	0.00010635	2	0	0	0	0.5
CTTN	src substrate cortactin isoform b [Homo sapiens]	1.05023	0.516042	0.0706991	0.287315	0	0.0004195	0.00057729	0	0.000498395	0	31	38	0	17.25	0	0	0	0.00047456	0.00047456	0	0	0	5	1.25
UBR4	gi|530360958|ref|XP_005245859.1|:PREDICTED: E3 ubiquitin-protein ligase UBR4 isoform X5 [Homo sapiens] ;gi|578798762|ref|XP_006710566.1|:PREDICTED: E3 ubiquitin-protein ligase UBR4 isoform X6 [Homo sapiens] ;gi|578798764|ref|XP_006710567.1|:PREDICTED: E3 ubiquitin-protein ligase UBR4 isoform X7 [Homo sapiens] ;gi|578798766|ref|XP_006710568.1|:PREDICTED: E3 ubiquitin-protein ligase UBR4 isoform X8…	1.04952	0.917225	0.0697297	0.0375241	5.617e-05	3.456e-05	2.835e-05	1.868e-05	3.444e-05	42	26	19	10	24.25	6.988e-05	2.855e-05	1.419e-05	1.864e-05	3.2815e-05	44	12	4	2	15.5
EPRS	bifunctional glutamate/proline--tRNA ligase [Homo sapiens]	1.04867	0.765439	0.068563	0.116089	0.00038348	0.00029843	0.00029895	0.00018714	0.000292	83	65	58	29	58.75	0.00026334	0.00024655	0.00028188	0.00032202	0.000278447	48	30	23	10	27.75
UBE2S	ubiquitin-conjugating enzyme E2 S [Homo sapiens]	1.04831	0.238476	0.0680606	0.622555	9.44e-05	0	0	0	9.44e-05	3	0	0	0	0.75	7.473e-05	0.00011195	8.347e-05	0	9.005e-05	2	2	1	0	1.25
SRPR	signal recognition particle receptor subunit alpha isoform 1 [Homo sapiens]	1.04695	0.914515	0.0661921	0.0388089	0.00072266	0.000457	0.00023209	0.0002141	0.000406462	66	42	19	14	35.25	0.0007021	0.00038953	0.00023236	0.00022895	0.000388235	54	20	8	3	21.25
FAM101B	protein FAM101B [Homo sapiens]	1.04598	0.884784	0.06485	0.0531628	0.00071816	0.00061635	0.00021851	0.00041034	0.00049084	22	19	6	9	14	0.00069772	0.00046453	0.00025977	0.00045504	0.000469265	18	8	3	2	7.75
ARL2	ADP-ribosylation factor-like protein 2 isoform 1 [Homo sapiens]	1.04595	0.882553	0.0648107	0.0542594	7.593e-05	0.0002641	0.00042356	0.00037119	0.000283695	2	7	10	7	6.5	0.00031558	0.0002026	0.00030213	0.00026462	0.000271233	7	3	3	1	3.5
MAP1B	microtubule-associated protein 1B [Homo sapiens]	1.04542	0.539879	0.0640773	0.267704	0.00131053	0.00133046	0.00122206	0.00110299	0.00124151	463	473	387	279	400.5	0.00105858	0.0012082	0.001359	0.00112452	0.00118757	314.952	239.966	181	57	198.229
PDLIM1	PDZ and LIM domain protein 1 [Homo sapiens]	1.04477	0.824372	0.0631802	0.0838769	0.00144386	0.00107612	0.00123179	0.00097866	0.00118261	68	51	52	33	51	0.0013363	0.001473	0.00112647	0.00059197	0.00113193	53	39	20	4	29
IRGQ	PREDICTED: immunity-related GTPase family Q protein isoform X2 [Homo sapiens]	1.04434	0.622534	0.0625889	0.205837	6.728e-05	2.229e-05	2.502e-05	0	3.81967e-05	6	2	2	0	2.5	1.331e-05	5.984e-05	0	0	3.6575e-05	1	3	0	0	1
TARS	threonine--tRNA ligase, cytoplasmic isoform 1 [Homo sapiens]	1.04416	0.726606	0.0623391	0.138701	0.00032851	0.00037447	0.00034494	0.00025641	0.000326082	34	39	32	19	31	0.00025241	0.00037811	0.00028193	0.00033672	0.000312292	22	22	11	5	15
RPS3	40S ribosomal protein S3 isoform 1 [Homo sapiens]	1.04414	0.696647	0.0623158	0.156987	0.00313352	0.00331388	0.00307888	0.00305154	0.00314445	109	116	96	76	99.25	0.00211646	0.00327272	0.00305028	0.00360664	0.00301152	62	64	40	18	46
RIPK2	gi|4506537|ref|NP_003812.1|:receptor-interacting serine/threonine-protein kinase 2 [Homo sapiens] ;gi|530389383|ref|XP_005251149.1|:PREDICTED: receptor-interacting serine/threonine-protein kinase 2 isoform X1 [Homo sapiens] ;	1.04402	0.922877	0.0621485	0.034856	5.175e-05	0.00010284	0.00011546	3.614e-05	7.65475e-05	4	8	8	2	5.5	3.072e-05	0.00013807	3.432e-05	9.017e-05	7.332e-05	2	6	1	1	2.5
SLC35A3	gi|411116139|ref|NP_001258614.1|:UDP-N-acetylglucosamine transporter isoform 3 [Homo sapiens] ;gi|411116141|ref|NP_001258613.1|:UDP-N-acetylglucosamine transporter isoform 2 [Homo sapiens] ;gi|530362262|ref|XP_005270748.1|:PREDICTED: UDP-N-acetylglucosamine transporter isoform X1 [Homo sapiens] ;gi|578798790|ref|XP_006710579.1|:PREDICTED: UDP-N-acetylglucosamine transporter isoform X4 [Homo sapie…	1.04348	0.602866	0.0614038	0.219779	0.00011421	3.783e-05	4.247e-05	0	6.48367e-05	6	2	2	0	2.5	9.041e-05	3.386e-05	0	0	6.2135e-05	4	1	0	0	1.25
FAM120A	gi|39652628|ref|NP_055427.2|:constitutive coactivator of PPAR-gamma-like protein 1 isoform a [Homo sapiens] ;gi|557878589|ref|NP_001273651.1|:constitutive coactivator of PPAR-gamma-like protein 1 isoform b [Homo sapiens] ;	1.0416	0.862984	0.0588011	0.0639972	9.373e-05	0.00014902	0.00013942	7.854e-05	0.000115178	15	24	20	9	17	8.904e-05	0.00016672	9.945e-05	8.71e-05	0.000110578	12	15	6	2	8.75
MRPL16	39S ribosomal protein L16, mitochondrial [Homo sapiens]	1.04075	0.287758	0.0576185	0.540973	0	2.766e-05	6.21e-05	0.00011662	6.87933e-05	0	1	2	3	1.5	6.61e-05	0	0	0	6.61e-05	2	0	0	0	0.5
HAUS6	HAUS augmin-like complex subunit 6 isoform 1 [Homo sapiens]	1.04064	0.891858	0.0574726	0.0497041	0.00051936	0.00053791	0.00046516	0.00037802	0.000475112	71	74	57	37	59.75	0.00058197	0.0006766	0.00046569	0.00010197	0.000456558	67	52	24	2	36.25
YARS2	gi|530399171|ref|XP_005253438.1|:PREDICTED: tyrosine--tRNA ligase, mitochondrial isoform X1 [Homo sapiens] ;gi|94681057|ref|NP_001035526.1|:tyrosine--tRNA ligase, mitochondrial precursor [Homo sapiens] ;	1.04054	0.963236	0.0573332	0.0162671	4.99e-05	0	3.711e-05	0	4.3505e-05	3	0	2	0	1.25	3.95e-05	0	4.412e-05	0	4.181e-05	2	0	1	0	0.75
CTBP2	gi|145580575|ref|NP_073713.2|:C-terminal-binding protein 2 isoform 2 [Homo sapiens] ;gi|578818970|ref|XP_006717706.1|:PREDICTED: C-terminal-binding protein 2 isoform X16 [Homo sapiens] ;	1.04006	0.819449	0.0566715	0.0864782	0.00030001	0.00019577	0.0002045	0.00018523	0.000221378	42.3019	27.7778	25.8462	18.7	28.6565	0.00025012	0.00014718	0.00020694	0.00024716	0.00021285	29.7	11.6667	11	5	14.3417
NOC2L	nucleolar complex protein 2 homolog [Homo sapiens]	1.03967	0.761696	0.056131	0.118218	0.00028913	0.0002039	0.00033296	0.00031264	0.000284657	31	22	32	24	27.25	0.00023257	0.00026544	0.00027214	0.00032503	0.000273795	21	16	11	5	13.25
FASN	fatty acid synthase [Homo sapiens]	1.03772	0.741107	0.0534181	0.130119	0.00173044	0.00150396	0.00132839	0.0013289	0.00147292	622	544	428	342	484	0.00110008	0.0016776	0.00138739	0.00151246	0.00141938	333	339	188	78	234.5
GFM2	gi|19923640|ref|NP_115756.2|:ribosome-releasing factor 2, mitochondrial isoform 1 [Homo sapiens] ;gi|526479814|ref|NP_001268231.1|:ribosome-releasing factor 2, mitochondrial isoform 4 [Homo sapiens] ;gi|578810631|ref|XP_006714784.1|:PREDICTED: ribosome-releasing factor 2, mitochondrial isoform X1 [Homo sapiens] ;	1.03767	0.918827	0.053346	0.0367662	5.381e-05	8.911e-05	0.00012005	3.757e-05	7.5135e-05	6	10	12	3	7.75	5.324e-05	6.381e-05	4.757e-05	0.00012501	7.24075e-05	5	4	2	2	3.25
SYAP1	synapse-associated protein 1 [Homo sapiens]	1.03688	0.472883	0.0522553	0.325246	9.923e-05	0.00017749	0.00026568	0.00033262	0.000218755	5	9	12	12	9.5	0.00028279	0.00021181	0	0.00013832	0.000210973	12	6	0	1	4.75
TRMT1	gi|209862871|ref|NP_001129507.1|:tRNA (guanine(26)-N(2))-dimethyltransferase isoform 1 [Homo sapiens] ;gi|530415005|ref|XP_005260040.1|:PREDICTED: tRNA (guanine(26)-N(2))-dimethyltransferase isoform X1 [Homo sapiens] ;	1.03667	0.608638	0.0519634	0.215641	4.24e-05	0	0	0	4.24e-05	4	0	0	0	1	6.294e-05	1.886e-05	0	0	4.09e-05	5	1	0	0	1.5
PELO	protein pelota homolog [Homo sapiens]	1.0347	0.882105	0.0492144	0.0544798	0.0003629	0.0002885	0.0002834	0.0003548	0.0003224	20	16	14	14	16	0.00017237	0.00048413	0.00033692	0.00025293	0.000311588	8	15	7	2	8
VARS	gi|530428457|ref|XP_005275078.1|:PREDICTED: valine--tRNA ligase isoform X1 [Homo sapiens] ;gi|530429033|ref|XP_005275347.1|:PREDICTED: valine--tRNA ligase isoform X1 [Homo sapiens] ;gi|5454158|ref|NP_006286.1|:valine--tRNA ligase [Homo sapiens] ;	1.03339	0.832266	0.047383	0.0797377	0.00047492	0.00042256	0.00038813	0.00026995	0.00038889	86	77	63	35	65.25	0.00043279	0.00039292	0.00041016	0.00026943	0.000376325	66	40	28	7	35.25
MCM2	DNA replication licensing factor MCM2 [Homo sapiens]	1.03328	0.859558	0.0472315	0.065725	0.00030138	0.00035324	0.00029312	0.00020507	0.000288203	39	46	34	19	34.5	0.00018352	0.00028866	0.00026648	0.00037702	0.00027892	20	21	13	7	15.25
VPS26A	vacuolar protein sorting-associated protein 26A isoform 1 [Homo sapiens]	1.03195	0.267152	0.0453702	0.573242	2.136e-05	0.00010615	9.533e-05	8.951e-05	7.80875e-05	1	5	4	3	3.25	0	3.8e-05	0.00011334	0	7.567e-05	0	1	2	0	0.75
	gi|578835948|ref|XP_006723836.1|:PREDICTED: mitochondrial ribosome-associated GTPase 2 isoform X3 [Homo sapiens] ;gi|578835950|ref|XP_006723837.1|:PREDICTED: mitochondrial ribosome-associated GTPase 2 isoform X4 [Homo sapiens] ;gi|578835952|ref|XP_006723838.1|:PREDICTED: mitochondrial ribosome-associated GTPase 2 isoform X5 [Homo sapiens] ;	1.02957	0.266896	0.0420457	0.573657	0	4.799e-05	1.796e-05	2.248e-05	2.94767e-05	0	3	1	1	1.25	0	2.863e-05	0	0	2.863e-05	0	1	0	0	0.25
TXLNA	alpha-taxilin [Homo sapiens]	1.02902	0.885407	0.0412682	0.052857	0.00015353	8.9e-05	8.564e-05	7.148e-05	9.99125e-05	12	7	6	4	7.25	0.00010635	9.103e-05	0.00010182	8.918e-05	9.7095e-05	7	4	3	1	3.75
CNIH4	gi|467094898|ref|NP_001264129.1|:protein cornichon homolog 4 isoform 5 [Homo sapiens] ;gi|578802213|ref|XP_006711831.1|:PREDICTED: protein cornichon homolog 4 isoform X1 [Homo sapiens] ;gi|7661824|ref|NP_054903.1|:protein cornichon homolog 4 isoform 1 [Homo sapiens] ;	1.02859	0.0944076	0.0406743	1.02499	0.00020396	0	0	0	0.00020396	4	0	0	0	1	0.0001211	0.0001814	0.00013526	0.0003554	0.00019829	2	2	1	1	1.5
	gi|578845914|ref|XP_006726658.1|:PREDICTED: pyridoxal-dependent decarboxylase domain-containing protein 1-like isoform X1 [Homo sapiens] ;gi|578845916|ref|XP_006726659.1|:PREDICTED: pyridoxal-dependent decarboxylase domain-containing protein 1-like isoform X2 [Homo sapiens] ;gi|578845918|ref|XP_006726660.1|:PREDICTED: pyridoxal-dependent decarboxylase domain-containing protein 1-like isoform X3 […	1.02825	0.938075	0.0401841	0.0277626	0.00010401	0.00012919	0.00014504	4.842e-05	0.000106665	12	15	15	4	11.5	0.00015438	0.00015417	4.598e-05	6.041e-05	0.000103735	15	10	2	1	7
	PREDICTED: serpin H1 isoform X3 [Homo sapiens]	1.02804	0.896137	0.0398921	0.0476256	0.00040109	0.00069752	0.00089494	0.00060689	0.00065011	24	42	48	26	35	0.0007938	0.00041619	0.00062064	0.00069889	0.00063238	40	14	14	6	18.5
NEFL	neurofilament light polypeptide [Homo sapiens]	1.02639	0.60369	0.0375766	0.219186	0	5.122e-05	8.612e-05	3.594e-05	5.776e-05	0	4.00617	6	2	3.00154	0	2.288e-05	0	8.967e-05	5.6275e-05	0	1	0	1	0.5
RPL29	60S ribosomal protein L29 [Homo sapiens]	1.02631	0.442443	0.0374651	0.354143	0.00035148	0.00026196	0.00024508	0.00024546	0.000275995	8	6	5	4	5.75	0.00041737	0.0001563	0.00023309	0	0.00026892	8	2	2	0	3
EIF4E	gi|194578907|ref|NP_001124150.1|:eukaryotic translation initiation factor 4E isoform 3 [Homo sapiens] ;gi|194578909|ref|NP_001124151.1|:eukaryotic translation initiation factor 4E isoform 2 [Homo sapiens] ;gi|4503535|ref|NP_001959.1|:eukaryotic translation initiation factor 4E isoform 1 [Homo sapiens] ;gi|578808863|ref|XP_006714189.1|:PREDICTED: eukaryotic translation initiation factor 4E isoform…	1.02558	0.949873	0.0364464	0.0223343	0.0001179	0.00023433	0.00052614	0.00016467	0.00026076	4	8	16	4	8	0.00021	0.00036702	0.00023456	0.00020544	0.000254255	6	7	3	1	4.25
RPAP3	RNA polymerase II-associated protein 3 isoform 1 [Homo sapiens]	1.02477	0.822767	0.0352981	0.0847233	0.00047272	0.00049064	0.00039846	0.00039615	0.000439492	45	47	34	27	38.25	0.00037422	0.00035503	0.00047371	0.00051252	0.00042887	30	19	17	7	18.25
WDR61	PREDICTED: WD repeat-containing protein 61 isoform X2 [Homo sapiens]	1.02402	0.169344	0.0342403	0.771231	0.00013742	0.0001138	0.00010221	6.398e-05	0.000104353	6	5	4	2	4.25	8.159e-05	0.00012222	0	0	0.000101905	3	3	0	0	1.5
FNBP1	gi|38524622|ref|NP_055848.1|:formin-binding protein 1 [Homo sapiens] ;gi|530390757|ref|XP_005251872.1|:PREDICTED: formin-binding protein 1 isoform X1 [Homo sapiens] ;gi|530390759|ref|XP_005251873.1|:PREDICTED: formin-binding protein 1 isoform X2 [Homo sapiens] ;gi|530390761|ref|XP_005251874.1|:PREDICTED: formin-binding protein 1 isoform X3 [Homo sapiens] ;gi|530390763|ref|XP_005251875.1|:PREDICTE…	1.02343	0.500035	0.0334132	0.300999	5.661e-05	3.375e-05	6.316e-05	1.581e-05	4.23325e-05	5	3	5	1	3.5	5.378e-05	4.028e-05	3.003e-05	0	4.13633e-05	4	2	1	0	1.75
KRT19	keratin, type I cytoskeletal 19 [Homo sapiens]	1.02292	0.870365	0.0326903	0.0602985	0.00127302	0.00164344	0.00128397	0.00153817	0.00143465	72.8925	94.6952	65.9004	63.0597	74.137	0.00114661	0.0016285	0.0017394	0.00109552	0.00140251	55.2903	52.4218	37.5468	9	38.5647
	PREDICTED: cyclin-dependent kinase 1 isoform X3 [Homo sapiens]	1.02243	0.708973	0.0320007	0.14937	0.00237092	0.00240367	0.00214641	0.00245812	0.00234478	100.8	102.836	81.7978	74.825	90.0648	0.00200812	0.00233998	0.00255199	0.00227328	0.00229334	71.8987	55.9286	40.9024	13.8667	45.6491
RPL28	gi|13904866|ref|NP_000982.2|:60S ribosomal protein L28 isoform 2 [Homo sapiens] ;gi|209915581|ref|NP_001129606.1|:60S ribosomal protein L28 isoform 1 [Homo sapiens] ;gi|209915584|ref|NP_001129607.1|:60S ribosomal protein L28 isoform 3 [Homo sapiens] ;gi|530416988|ref|XP_005259189.1|:PREDICTED: 60S ribosomal protein L28 isoform X1 [Homo sapiens] ;	1.0224	0.265536	0.0319566	0.575877	0.00015297	0.00025336	0.00034132	0.00042731	0.00029374	3	5	6	6	5	0.0001211	0.00045351	0	0	0.000287305	2	5	0	0	1.75
AP2B1	gi|4557469|ref|NP_001273.1|:AP-2 complex subunit beta isoform b [Homo sapiens] ;gi|530410947|ref|XP_005257995.1|:PREDICTED: AP-2 complex subunit beta isoform X2 [Homo sapiens] ;	1.02167	0.909231	0.030924	0.0413259	0.00023062	0.00021089	0.00018536	0.00026907	0.000223985	30.9333	28.4651	22.2857	25.84	26.881	0.00015935	0.00029956	0.00015821	0.00025982	0.000219235	18	22.5882	8	5	13.3971
MCM7	DNA replication licensing factor MCM7 isoform 1 [Homo sapiens]	1.02163	0.849433	0.0308667	0.0708711	0.00091329	0.00118758	0.00112728	0.00085492	0.00102077	94	123	104	63	96	0.0010268	0.00101967	0.00079895	0.00115122	0.00099916	89	59	31	17	49
PDLIM5	PDZ and LIM domain protein 5 isoform a [Homo sapiens]	1.01864	0.855256	0.0266449	0.0679041	0.00048056	0.00055909	0.00058843	0.00049112	0.0005298	41	48	45	30	41	0.00052889	0.00052123	0.00062183	0.00040847	0.000520105	38	25	20	5	22
PLK1	serine/threonine-protein kinase PLK1 [Homo sapiens]	1.01735	0.914423	0.0248121	0.0388528	0.00020853	0.00026479	0.00024556	0.00030743	0.000256577	18	23	19	19	19.75	0.00027513	0.00016486	0.00024584	0.00032298	0.000252202	20	8	8	4	10
KIF5B	kinesin-1 heavy chain [Homo sapiens]	1.01682	0.898561	0.0240692	0.0464523	0.00031406	0.00038206	0.00043793	0.00035461	0.000372165	43.2941	53	54.1136	35	46.3519	0.00041347	0.00041291	0.00038485	0.0002528	0.000366008	48	32	20	5	26.25
RPL32	60S ribosomal protein L32 [Homo sapiens]	1.01658	0.461085	0.023722	0.336219	0.00041397	0.00020569	0.00046183	0.00057819	0.00041492	8	4	8	8	7	0.00030723	0.00036818	0.00054905	0	0.000408153	5	4	4	0	3.25
NEURL4	gi|53829368|ref|NP_001005408.1|:neuralized-like protein 4 isoform 2 [Homo sapiens] ;gi|53829370|ref|NP_115818.2|:neuralized-like protein 4 isoform 1 [Homo sapiens] ;	1.01559	0.985665	0.0223201	0.00627061	0	8.9e-06	9.99e-06	0	9.445e-06	0	2	2	0	1	1.063e-05	7.97e-06	0	0	9.3e-06	2	1	0	0	0.75
MYO1D	unconventional myosin-Id [Homo sapiens]	1.01555	0.940169	0.0222578	0.026794	0.00028471	0.00023462	0.00020917	0.00033946	0.00026699	41	34	27	35	34.25	0.00032983	0.00014822	0.00033156	0.000242	0.000262902	40	12	18	5	18.75
PRDX4	peroxiredoxin-4 precursor [Homo sapiens]	1.01536	0.89481	0.0219926	0.0482692	0.00064444	0.00069164	0.00063268	0.00050405	0.000618202	25	27	22	14	22	0.0006428	0.00045853	0.0006154	0.00071867	0.00060885	21	10	9	4	11
SNAP29	synaptosomal-associated protein 29 [Homo sapiens]	1.01529	0.546344	0.0218973	0.262534	8.123e-05	0.00010763	0.00012083	0.00018909	0.000124695	3	4	4	5	4	3.215e-05	0.00019265	0.00014365	0	0.000122817	1	4	2	0	1.75
DRG2	developmentally-regulated GTP-binding protein 2 [Homo sapiens]	1.01476	0.960211	0.021136	0.0176332	0.00024949	0.00041957	0.00017128	0.00024124	0.000270395	13	22	8	9	13	0.00027347	0.00013655	0.00025454	0.00040129	0.000266463	12	4	5	3	6
CCZ1	vacuolar fusion protein CCZ1 homolog [Homo sapiens]	1.01404	0.290709	0.0201177	0.536542	5.797e-05	1.44e-05	3.234e-05	0	3.49033e-05	4	1	2	0	1.75	3.442e-05	0	0	0	3.442e-05	2	0	0	0	0.5
BLVRA	biliverdin reductase A precursor [Homo sapiens]	1.01311	0.942611	0.0187867	0.0256676	0.00070801	0.00056287	0.00107949	0.00072518	0.000768887	30	24	41	22	29.25	0.00064456	0.0006297	0.00093904	0.00082246	0.00075894	23	15	15	5	14.5
NOMO2	gi|27734709|ref|NP_775885.1|:nodal modulator 2 isoform 2 precursor [Homo sapiens] ;gi|51944953|ref|NP_055102.3|:nodal modulator 1 precursor [Homo sapiens] ;gi|51944969|ref|NP_001004067.1|:nodal modulator 3 precursor [Homo sapiens] ;gi|51944971|ref|NP_001004060.1|:nodal modulator 2 isoform 1 precursor [Homo sapiens] ;gi|578840012|ref|XP_006725258.1|:PREDICTED: nodal modulator 2 isoform X1 [Homo sa…	1.01163	0.524126	0.0166787	0.280564	5.145e-05	9.089e-05	3.827e-05	4.791e-05	5.713e-05	9	16	6	6	9.25	8.825e-05	5.084e-05	3.033e-05	0	5.64733e-05	13	5	2	0	5
DYNLL2	dynein light chain 2, cytoplasmic [Homo sapiens]	1.0114	0.57607	0.0163489	0.239525	0.00215401	0.00091	0.00074073	0.00063784	0.00111064	27.4426	11.6667	8.45902	5.81818	13.3466	0	0.00055848	0.00136822	0.00136769	0.00109813	0	4	6.57143	2.5	3.26786
VIPAS39	spermatogenesis-defective protein 39 homolog isoform 1 [Homo sapiens]	1.0106	0.966316	0.0152158	0.0148809	0.00021255	0.00016897	0.00012647	7.916e-05	0.000146788	15	12	8	4	9.75	0.00016826	0.00012603	0.00018794	9.876e-05	0.000145247	10	5	5	1	5.25
GLO1	lactoylglutathione lyase [Homo sapiens]	1.01039	0.959842	0.0149175	0.0178001	0.00144271	0.00139595	0.00122831	0.00100751	0.00126862	38	37	29	19	30.75	0.00135247	0.0008104	0.00100709	0.00185232	0.00125557	30	12	10	7	14.75
ARPC5	actin-related protein 2/3 complex subunit 5 isoform 1 [Homo sapiens]	1.0096	0.125909	0.0137767	0.899942	4.626e-05	0.00022987	0.00015484	6.462e-05	0.000123897	1	5	3	1	2.5	0	0	0.00012272	0	0.00012272	0	0	1	0	0.25
CHMP4B	charged multivesicular body protein 4b [Homo sapiens]	1.00806	0.529804	0.0115836	0.275885	0.00046779	0.0003409	0.00069584	0.0003049	0.000452357	15	11	20	7	13.25	0.00018516	0.00049926	0.0006618	0	0.00044874	5	9	8	0	5.5
ACLY	gi|530412282|ref|XP_005257450.1|:PREDICTED: ATP-citrate synthase isoform X1 [Homo sapiens] ;gi|530412286|ref|XP_005257452.1|:PREDICTED: ATP-citrate synthase isoform X3 [Homo sapiens] ;	1.00761	0.383381	0.0109366	0.41637	0.00078627	0.00057099	0.00077597	0.00066736	0.000700147	130	95	115	79	104.75	0.0007972	0.00052932	0.00075806	0	0.00069486	111	49.2	47.25	0	51.8625
VPS45	gi|18105063|ref|NP_009190.2|:vacuolar protein sorting-associated protein 45 isoform 1 [Homo sapiens] ;gi|525342526|ref|NP_001266283.1|:vacuolar protein sorting-associated protein 45 isoform 3 [Homo sapiens] ;	1.00708	0.893879	0.0101756	0.0487212	0.00057602	0.00063331	0.00056058	0.00058199	0.000587975	47	52	41	34	43.5	0.00050935	0.0006104	0.00061768	0.00059794	0.000583843	35	28	19	7	22.25
SLC25A3	phosphate carrier protein, mitochondrial isoform b precursor [Homo sapiens]	1.00528	0.983313	0.00759144	0.00730834	0.00085145	0.00138456	0.00103624	0.00127029	0.00113564	44	72	48	47	52.75	0.00055148	0.0011359	0.00107795	0.00175337	0.00112967	24	33	21	13	22.75
CEP41	centrosomal protein of 41 kDa isoform 1 [Homo sapiens]	1.00449	0.495576	0.0064631	0.304889	9.364e-05	0	0.00014626	0.00010463	0.000114843	5	0	7	4	4	4.448e-05	0.00013326	0.00014904	0.00013054	0.00011433	2	4	3	1	2.5
CFL1	cofilin-1 [Homo sapiens]	1.00419	0.98277	0.00602579	0.00754802	0.00315621	0.00330475	0.00264413	0.00164574	0.00268771	75	79.0244	56.32	28	59.5861	0.00331089	0.00284453	0.00279073	0.00175987	0.00267651	66.2564	38	25	6	33.8141
IKBKAP	elongator complex protein 1 [Homo sapiens]	1.00324	0.994683	0.00466005	0.00231549	0.00011014	8.86e-05	4.681e-05	3.663e-05	7.0545e-05	21	17	8	5	12.75	1.868e-05	7.463e-05	4.174e-05	0.00014622	7.03175e-05	3	8	3	4	4.5
ATG2A	gi|239047271|ref|NP_055919.2|:autophagy-related protein 2 homolog A [Homo sapiens] ;gi|530396478|ref|XP_005273906.1|:PREDICTED: autophagy-related protein 2 homolog A isoform X1 [Homo sapiens] ;gi|530396480|ref|XP_005273907.1|:PREDICTED: autophagy-related protein 2 homolog A isoform X2 [Homo sapiens] ;	1.00019	0.999649	0.000277308	0.000152562	2.523e-05	2.149e-05	3.217e-05	2.517e-05	2.6015e-05	7	6	8	5	6.5	5.641e-05	1.282e-05	9.69e-06	2.512e-05	2.601e-05	13.1793	2	1.01333	1	4.29816
TPD52L2	gi|40805860|ref|NP_003279.2|:tumor protein D54 isoform e [Homo sapiens] ;gi|40805864|ref|NP_955392.1|:tumor protein D54 isoform a [Homo sapiens] ;gi|40805868|ref|NP_955394.1|:tumor protein D54 isoform c [Homo sapiens] ;	0.998357	0.995516	-0.00237269	0.00195182	0.00096647	0.00111207	0.0011728	0.00073414	0.00099637	28.5	33	31	15.5	27	0.00080536	0.00130293	0.00152921	0.00035454	0.00099801	20	21.6	17	1.5	15.025
IRF3	gi|308199448|ref|NP_001184052.1|:interferon regulatory factor 3 isoform 3 [Homo sapiens] ;gi|308199454|ref|NP_001184054.1|:interferon regulatory factor 3 isoform 5 [Homo sapiens] ;gi|578834421|ref|XP_006723262.1|:PREDICTED: interferon regulatory factor 3 isoform X3 [Homo sapiens] ;	0.997614	0.143309	-0.00344689	0.843728	0.00019603	0.00014167	5.964e-05	2.489e-05	0.000105558	11	8	3	1	5.75	0.00010581	0	0	0	0.00010581	5	0	0	0	1.25
STRIP1	gi|399154157|ref|NP_001257697.1|:striatin-interacting protein 1 isoform 2 [Homo sapiens] ;gi|56790935|ref|NP_149079.2|:striatin-interacting protein 1 isoform 1 [Homo sapiens] ;gi|578799988|ref|XP_006711057.1|:PREDICTED: striatin-interacting protein 1 isoform X1 [Homo sapiens] ;	0.997512	0.992643	-0.00359461	0.00320671	5.649e-05	8.42e-05	7.352e-05	2.63e-05	6.01275e-05	6	9	7	2	6	6.708e-05	3.349e-05	7.492e-05	6.562e-05	6.02775e-05	6	2	3	1	3
MYH10	gi|367460087|ref|NP_005955.3|:myosin-10 isoform 2 [Homo sapiens] ;gi|367460090|ref|NP_001243024.1|:myosin-10 isoform 3 [Homo sapiens] ;gi|530410341|ref|XP_005256708.1|:PREDICTED: myosin-10 isoform X1 [Homo sapiens] ;gi|530410343|ref|XP_005256709.1|:PREDICTED: myosin-10 isoform X2 [Homo sapiens] ;gi|530410345|ref|XP_005256710.1|:PREDICTED: myosin-10 isoform X3 [Homo sapiens] ;	0.995944	0.988959	-0.00586318	0.00482181	0.00012239	5.874e-05	7.265e-05	7.036e-05	8.1035e-05	34.6196	16.7205	18.4193	14.2497	21.0023	0.00013381	6.312e-05	7.477e-05	5.376e-05	8.1365e-05	31.8757	10.0366	7.97297	2.18182	13.0168
IDI1	gi|40018633|ref|NP_004499.2|:isopentenyl-diphosphate Delta-isomerase 1 [Homo sapiens] ;gi|530392146|ref|XP_005252502.1|:PREDICTED: isopentenyl-diphosphate Delta-isomerase 1 isoform X1 [Homo sapiens] ;	0.995554	0.990775	-0.00642892	0.00402478	0.00041816	0.0003911	0.0006586	0.00034355	0.000452853	17	16	24	10	16.75	0.0003505	0.00048129	0.0001305	0.00085721	0.000454875	12	11	2	5	7.5
PHB2	prohibitin-2 isoform 1 [Homo sapiens]	0.994261	0.960847	-0.00830325	0.0173459	0.00249991	0.001602	0.00182455	0.00192528	0.00196294	107	69	70	59	76.25	0.0021917	0.00207794	0.00167332	0.0019541	0.00197426	79	50	27	12	42
EEF2	elongation factor 2 [Homo sapiens]	0.99218	0.944824	-0.0113261	0.024649	0.00138412	0.00113273	0.00105366	0.00135237	0.00123072	170	140	116	118.924	136.231	0.00150821	0.00130344	0.00101507	0.00113496	0.00124042	156	90	47	20	78.25
PDK3	gi|215422338|ref|NP_001135858.1|:pyruvate dehydrogenase kinase, isozyme 3 isoform 1 precursor [Homo sapiens] ;gi|4885545|ref|NP_005382.1|:pyruvate dehydrogenase kinase, isozyme 3 isoform 2 precursor [Homo sapiens] ;	0.992008	0.983296	-0.011577	0.00731586	0.000101	3.346e-05	0.00011268	4.702e-05	7.354e-05	6	2	6	2	4	5.997e-05	2.994e-05	8.93e-05	0.00011732	7.41325e-05	3	1	2	1	1.75
AP3S1	AP-3 complex subunit sigma-1 [Homo sapiens]	0.990825	0.56538	-0.0132982	0.24766	0	0.00025178	0.0002019	0.00030332	0.000252333	0	7	5	6	4.5	0.00012894	0.00019315	0.00019203	0.00050456	0.00025467	3	3	2	2	2.5
TMED9	transmembrane emp24 domain-containing protein 9 precursor [Homo sapiens]	0.988444	0.981994	-0.0167691	0.00789129	0	0.00017724	0.00013265	0.00020759	0.000172493	0	6	4	5	3.75	0	0.00015863	0.00015771	0.00020719	0.00017451	0	3	2	1	1.5
CDKN2A	cyclin-dependent kinase inhibitor 2A isoform p14ARF [Homo sapiens]	0.985042	0.0847262	-0.0217426	1.07198	0.00010584	0.00010518	0.00023616	0.00029566	0.00018571	2	2	4	4	3	0.00018853	0	0	0	0.00018853	3	0	0	0	0.75
SH3PXD2B	SH3 and PX domain-containing protein 2B [Homo sapiens]	0.983522	0.210656	-0.0239711	0.676427	0	0	1.711e-05	0	1.711e-05	0	0	2	0	0.5	1.821e-05	1.364e-05	2.034e-05	0	1.73967e-05	2	1	1	0	1
PICALM	gi|530397456|ref|XP_005274385.1|:PREDICTED: phosphatidylinositol-binding clathrin assembly protein isoform X7 [Homo sapiens] ;gi|530397458|ref|XP_005274386.1|:PREDICTED: phosphatidylinositol-binding clathrin assembly protein isoform X8 [Homo sapiens] ;gi|530397468|ref|XP_005274391.1|:PREDICTED: phosphatidylinositol-binding clathrin assembly protein isoform X13 [Homo sapiens] ;gi|530397472|ref|XP_…	0.982172	0.526815	-0.0259528	0.278342	3.2e-05	5.829e-05	5.949e-05	4.469e-05	4.86175e-05	3	5.5	5	3	4.125	4.433e-05	7.588e-05	2.829e-05	0	4.95e-05	3.5	4	1	0	2.125
SEC63	translocation protein SEC63 homolog [Homo sapiens]	0.980778	0.934802	-0.0280012	0.0292803	0.00041363	0.00025576	0.00031789	0.00016689	0.000288542	45	28	31	13	29.25	0.00031653	0.00027795	0.00039011	0.0001922	0.000294198	29	17	16	3	16.25
CCDC6	coiled-coil domain-containing protein 6 [Homo sapiens]	0.980012	0.970011	-0.0291287	0.0132233	0	7.323e-05	8.221e-05	4.117e-05	6.55367e-05	0	5	5	2	3	7e-05	5.243e-05	7.819e-05	0	6.68733e-05	4	2	2	0	2
RPL23	60S ribosomal protein L23 [Homo sapiens]	0.979482	0.945187	-0.0299087	0.0244823	0.00608757	0.00347101	0.0028947	0.00285738	0.00382767	122	70	52	41	71.25	0.00610288	0.00284025	0.00251485	0.0041734	0.00390785	103	32	19	12	41.5
PIGU	phosphatidylinositol glycan anchor biosynthesis class U protein precursor [Homo sapiens]	0.979234	0.648063	-0.0302746	0.188383	9.635e-05	3.192e-05	5.375e-05	0	6.06733e-05	6	2	3	0	2.75	9.535e-05	2.857e-05	0	0	6.196e-05	5	1	0	0	1.5
EIF5	eukaryotic translation initiation factor 5 [Homo sapiens]	0.97822	0.931811	-0.031769	0.0306721	9.725e-05	0.0002416	0.00016274	0.0001811	0.000170673	6	15	9	8	9.5	0.00015397	0.00017299	0.00025796	0.00011297	0.000174473	8	6	6	1	5.25
KPNA2	importin subunit alpha-1 [Homo sapiens]	0.977604	0.880003	-0.0326784	0.0555157	0.00025091	0.00032807	0.00026518	0.00029511	0.000284817	19	25	18	16	19.5	0.00036066	0.00030537	0.00031526	0.00018408	0.000291342	23	13	9	2	11.75
RPL7	60S ribosomal protein L7 [Homo sapiens]	0.974539	0.930706	-0.0372079	0.0311874	0.00042252	0.00083976	0.00069135	0.00074751	0.000675285	15	30	22	19	21.5	0.00066897	0.00055116	0.0003736	0.00117798	0.000692927	20	11	5	6	10.5
	PREDICTED: tropomodulin-3 isoform X1 [Homo sapiens]	0.97448	0.936229	-0.0372949	0.0286179	0.00017861	0.00051118	0.00042067	0.00013859	0.000312263	9	25.92	19	5	14.73	0.00042418	0.00031771	0.00026322	0.00027665	0.00032044	18	9	5	2	8.5
HK1	gi|15991827|ref|NP_277031.1|:hexokinase-1 isoform HKI-R [Homo sapiens] ;gi|188497750|ref|NP_277035.2|:hexokinase-1 isoform HKI-td [Homo sapiens] ;gi|188497754|ref|NP_000179.2|:hexokinase-1 isoform HKI [Homo sapiens] ;gi|530393496|ref|XP_005269792.1|:PREDICTED: hexokinase-1 isoform X1 [Homo sapiens] ;gi|530393498|ref|XP_005269793.1|:PREDICTED: hexokinase-1 isoform X2 [Homo sapiens] ;gi|530393500|r…	0.973526	0.591642	-0.0387093	0.227941	0	5.305e-05	2.552e-05	0	3.9285e-05	0	7	3	0	2.5	5.434e-05	1.357e-05	0	5.315e-05	4.03533e-05	6	1	0	1	2
PRDX1	peroxiredoxin-1 [Homo sapiens]	0.972731	0.933518	-0.0398873	0.0298773	0.00052656	0.00068219	0.00097396	0.0007948	0.000744378	15	19.5556	24.8696	16.2105	18.9089	0.00066695	0.0013113	0.00083806	0.00024467	0.000765245	16	21	9	1	11.75
NEDD4L	gi|21361472|ref|NP_056092.2|:E3 ubiquitin-protein ligase NEDD4-like isoform 3 [Homo sapiens] ;gi|222352086|ref|NP_001138439.1|:E3 ubiquitin-protein ligase NEDD4-like isoform 1 [Homo sapiens] ;gi|222352088|ref|NP_001138440.1|:E3 ubiquitin-protein ligase NEDD4-like isoform 4 [Homo sapiens] ;gi|222352090|ref|NP_001138441.1|:E3 ubiquitin-protein ligase NEDD4-like isoform 5 [Homo sapiens] ;gi|34547867…	0.971999	0.639033	-0.0409727	0.194476	1.463e-05	4.361e-05	4.896e-05	2.043e-05	3.19075e-05	2	6	6	2	4	8.69e-06	0	3.881e-05	5.098e-05	3.28267e-05	1	0	2	1	1
NME1	gi|38045913|ref|NP_937818.1|:nucleoside diphosphate kinase A isoform a [Homo sapiens] ;gi|4557797|ref|NP_000260.1|:nucleoside diphosphate kinase A isoform b [Homo sapiens] ;	0.968874	0.292715	-0.0456194	0.533555	0.00013814	0.00020918	0	0.00041343	0.000253583	3.5	5.33333	0	7.5	4.08333	0	0	0.00026173	0	0.00026173	0	0	2.5	0	0.625
NUP188	nucleoporin NUP188 homolog [Homo sapiens]	0.968607	0.908209	-0.0460163	0.0418144	5.991e-05	5.557e-05	4.456e-05	2.231e-05	4.55875e-05	15	14	10	4	10.75	6.166e-05	4.973e-05	2.119e-05	5.568e-05	4.7065e-05	13	7	2	2	6
VPS16	vacuolar protein sorting-associated protein 16 homolog isoform 1 [Homo sapiens]	0.967809	0.437848	-0.0472052	0.358676	2.498e-05	7.447e-05	4.644e-05	0	4.863e-05	3	9	5	0	4.25	3.955e-05	5.924e-05	4.417e-05	5.803e-05	5.02475e-05	4	4	2	1	2.75
GGA1	gi|289577051|ref|NP_001166158.1|:ADP-ribosylation factor-binding protein GGA1 isoform 4 [Homo sapiens] ;gi|530419903|ref|XP_005261574.1|:PREDICTED: ADP-ribosylation factor-binding protein GGA1 isoform X1 [Homo sapiens] ;gi|530419905|ref|XP_005261575.1|:PREDICTED: ADP-ribosylation factor-binding protein GGA1 isoform X2 [Homo sapiens] ;gi|578837166|ref|XP_006724291.1|:PREDICTED: ADP-ribosylation fa…	0.967503	0.900463	-0.0476617	0.0455343	5.501e-05	4.373e-05	6.137e-05	3.073e-05	4.771e-05	5	4	5	2	4	5.225e-05	3.914e-05	2.918e-05	7.668e-05	4.93125e-05	4	2	1	1	2
HS1BP3	HCLS1-binding protein 3 [Homo sapiens]	0.965267	0.519549	-0.0510002	0.284374	0.00010692	0.00015938	0.00013917	0	0.000135157	6	9	7	0	5.5	0.00016929	9.51e-05	4.727e-05	0.00024842	0.00014002	8	3	1	2	3.5
ARCN1	coatomer subunit delta isoform 1 [Homo sapiens]	0.964256	0.847128	-0.0525116	0.072051	0.00061518	0.0009102	0.00105234	0.00080194	0.000844915	45	67	69	42	55.75	0.0005844	0.00114291	0.00101537	0.00076226	0.000876235	36	47	28	8	29.75
TOE1	gi|156564398|ref|NP_079353.3|:target of EGR1 protein 1 [Homo sapiens] ;gi|530361682|ref|XP_005270469.1|:PREDICTED: target of EGR1 protein 1 isoform X1 [Homo sapiens] ;gi|530361684|ref|XP_005270470.1|:PREDICTED: target of EGR1 protein 1 isoform X2 [Homo sapiens] ;	0.963672	0.235028	-0.0533858	0.62888	6.849e-05	5.445e-05	3.056e-05	5.739e-05	5.27225e-05	5	4	2	3	3.5	0	7.309e-05	3.633e-05	0	5.471e-05	0	3	1	0	1
DLD	dihydrolipoyl dehydrogenase, mitochondrial precursor [Homo sapiens]	0.962586	0.873582	-0.0550128	0.0586964	0.0005627	0.00107744	0.00084212	0.0011693	0.00091289	41	79	55	61	59	0.0005378	0.0009521	0.00134701	0.00095658	0.000948372	33	39	37	10	29.75
MIA3	gi|122891870|ref|NP_940953.2|:melanoma inhibitory activity protein 3 precursor [Homo sapiens] ;gi|530366181|ref|XP_005273178.1|:PREDICTED: melanoma inhibitory activity protein 3 isoform X1 [Homo sapiens] ;gi|578800895|ref|XP_006711367.1|:PREDICTED: melanoma inhibitory activity protein 3 isoform X3 [Homo sapiens] ;	0.961969	0.895967	-0.0559384	0.0477082	1.465e-05	4.004e-05	3.678e-05	3.07e-05	3.05425e-05	4	11	9	6	7.5	3.045e-05	2.606e-05	1.943e-05	5.106e-05	3.175e-05	7	4	2	2	3.75
	gi|578840738|ref|XP_006725512.1|:PREDICTED: general transcription factor IIH subunit 2 isoform X2 [Homo sapiens] ;gi|578840740|ref|XP_006725513.1|:PREDICTED: general transcription factor IIH subunit 2 isoform X3 [Homo sapiens] ;	0.960135	0.59277	-0.0586904	0.227114	8.843e-05	6.151e-05	7.892e-05	4.94e-05	6.9565e-05	5	3.5	4	2	3.625	0	4.719e-05	4.691e-05	0.00012326	7.24533e-05	0	1.5	1	1	0.875
ATXN7L3B	putative ataxin-7-like protein 3B [Homo sapiens]	0.959994	0.89845	-0.0589024	0.0465059	0.00050413	0.0002147	0.00040172	0.00020117	0.00033043	7	3	5	2	4.25	0.00042759	0.00025621	0.00019104	0.00050196	0.0003442	5	2	1	1	2.25
FLJ44635	gi|254553403|ref|NP_997305.2|:TPT1-like protein [Homo sapiens] ;gi|4507669|ref|NP_003286.1|:translationally-controlled tumor protein isoform 2 [Homo sapiens] ;gi|555943820|ref|NP_001273202.1|:translationally-controlled tumor protein isoform 3 [Homo sapiens] ;gi|555943903|ref|NP_001273201.1|:translationally-controlled tumor protein isoform 1 [Homo sapiens] ;	0.958766	0.0733392	-0.0607499	1.13466	0.00024949	0	0	0	0.00024949	5	0	0	0	1.25	0.0001185	0.00017752	0.00039708	0.00034778	0.00026022	2	2	3	1	2
SND1	staphylococcal nuclease domain-containing protein 1 [Homo sapiens]	0.957996	0.912053	-0.0619078	0.0399802	0.00011515	0.00012969	8.564e-05	2.144e-05	8.798e-05	15	17	10	2	11	6.381e-05	8.193e-05	6.109e-05	0.00016052	9.18375e-05	7	6	3	3	4.75
BRCC3	gi|13236583|ref|NP_077308.1|:lys-63-specific deubiquitinase BRCC36 isoform 1 [Homo sapiens] ;gi|336285487|ref|NP_001229569.1|:lys-63-specific deubiquitinase BRCC36 isoform 3 [Homo sapiens] ;gi|530422945|ref|XP_005274808.1|:PREDICTED: lys-63-specific deubiquitinase BRCC36 isoform X3 [Homo sapiens] ;gi|64762484|ref|NP_001018065.1|:lys-63-specific deubiquitinase BRCC36 isoform 2 [Homo sapiens] ;	0.95709	0.517722	-0.0632736	0.285904	0	4.394e-05	0	0	4.394e-05	0	2	0	0	0.5	5.25e-05	3.932e-05	0	0	4.591e-05	2	1	0	0	0.75
	gi|557947952|ref|NP_001273675.1|:protein aurora borealis isoform 2 [Homo sapiens] ;gi|557948045|ref|NP_079084.3|:protein aurora borealis isoform 1 [Homo sapiens] ;gi|578825016|ref|XP_006719931.1|:PREDICTED: protein aurora borealis isoform X1 [Homo sapiens] ;	0.956959	0.517649	-0.0634714	0.285965	0	2.19e-05	0	0	2.19e-05	0	2	0	0	0.5	2.617e-05	1.96e-05	0	0	2.2885e-05	2	1	0	0	0.75
SLC25A5	ADP/ATP translocase 2 [Homo sapiens]	0.956766	0.706665	-0.0637618	0.150787	0.00291095	0.00183257	0.00203189	0.00221004	0.00224636	124.177	78.6667	77.6941	67.5	87.0093	0.0022775	0.00262699	0.00236294	0.00212405	0.00234787	81.8182	63	38	13	48.9545
DPYSL3	dihydropyrimidinase-related protein 3 isoform 1 [Homo sapiens]	0.954452	0.701286	-0.0672558	0.154105	0.00061278	0.00068631	0.00070662	0.00042609	0.00060795	60	67.623	62.0174	29.871	54.8778	0.00060065	0.00065628	0.00072145	0.00056947	0.000636962	49.5285	36.125	26.6304	8	30.071
CTBP1	gi|4557497|ref|NP_001319.1|:C-terminal-binding protein 1 isoform 1 [Homo sapiens] ;gi|530427319|ref|XP_005272318.1|:PREDICTED: C-terminal-binding protein 1 isoform X3 [Homo sapiens] ;gi|530427323|ref|XP_005272320.1|:PREDICTED: C-terminal-binding protein 1 isoform X5 [Homo sapiens] ;gi|61743967|ref|NP_001012632.1|:C-terminal-binding protein 1 isoform 2 [Homo sapiens] ;	0.954008	0.360827	-0.0679274	0.442701	0.00026511	0.00019283	0.000109	7.318e-05	0.00016003	16.6981	12.2222	6.15385	3.3	9.59355	0.00026959	6.59e-05	0	0	0.000167745	14.3	2.33333	0	0	4.15833
ARHGEF18	gi|195972857|ref|NP_001124427.1|:rho guanine nucleotide exchange factor 18 isoform b [Homo sapiens] ;gi|530427472|ref|XP_005272521.1|:PREDICTED: rho guanine nucleotide exchange factor 18 isoform X2 [Homo sapiens] ;gi|530427474|ref|XP_005272522.1|:PREDICTED: rho guanine nucleotide exchange factor 18 isoform X3 [Homo sapiens] ;gi|578833128|ref|XP_006722769.1|:PREDICTED: rho guanine nucleotide excha…	0.953215	0.905176	-0.0691265	0.0432669	3.573e-05	6.51e-05	4.651e-05	8.32e-06	3.8915e-05	6	11	7	1	6.25	4.243e-05	6.356e-05	1.58e-05	4.151e-05	4.0825e-05	6	6	1	1	3.5
EIF4A3	eukaryotic initiation factor 4A-III [Homo sapiens]	0.953185	0.808645	-0.0691712	0.0922419	0.0005951	0.0003899	0.00050021	0.00027458	0.000439947	35.0122	23.0837	26.3793	11.5663	24.0104	0.00043684	0.00037479	0.0004291	0.00060549	0.000461555	21.6438	12.3962	9.51724	5.11111	12.1671
LAMP1	lysosome-associated membrane glycoprotein 1 precursor [Homo sapiens]	0.953011	0.223988	-0.0694352	0.649776	0.00013402	9.989e-05	7.476e-05	7.019e-05	9.4715e-05	8	6	4	3	5.25	7.957e-05	0.0001192	0	0	9.9385e-05	4	4	0	0	2
TPD52	gi|4827038|ref|NP_005070.1|:tumor protein D52 isoform 3 [Homo sapiens] ;gi|560575149|ref|NP_001274072.1|:tumor protein D52 isoform 6 [Homo sapiens] ;gi|560575325|ref|NP_001274071.1|:tumor protein D52 isoform 5 [Homo sapiens] ;gi|560575997|ref|NP_001274069.1|:tumor protein D52 isoform 4 [Homo sapiens] ;gi|70608172|ref|NP_001020423.1|:tumor protein D52 isoform 1 [Homo sapiens] ;gi|70608174|ref|NP_0…	0.952503	0.873336	-0.0702051	0.0588188	0.00037966	0.00067911	0.00080476	0.0007954	0.000664732	10	18	19	15	15.5	0.00067624	0.00074286	0.0011078	0.00026462	0.00069788	15	11	11	1	9.5
RPL7A	60S ribosomal protein L7a [Homo sapiens]	0.952008	0.811186	-0.0709544	0.0908796	0.00160199	0.00138318	0.00128914	0.00135716	0.00140787	61	53	44	37	48.75	0.0014345	0.00172844	0.00202024	0.00073218	0.00147884	46	37	29	4	29
DCXR	gi|304571975|ref|NP_001182147.1|:L-xylulose reductase isoform 2 [Homo sapiens] ;gi|7705925|ref|NP_057370.1|:L-xylulose reductase isoform 1 [Homo sapiens] ;	0.950285	0.304631	-0.0735683	0.516226	8.66e-05	2.869e-05	6.441e-05	8.064e-05	6.5085e-05	3	1	2	2	2	3.428e-05	0.0001027	0	0	6.849e-05	1	2	0	0	0.75
PDHA1	gi|291084742|ref|NP_001166925.1|:pyruvate dehydrogenase E1 component subunit alpha, somatic form, mitochondrial isoform 2 precursor [Homo sapiens] ;gi|4505685|ref|NP_000275.1|:pyruvate dehydrogenase E1 component subunit alpha, somatic form, mitochondrial isoform 1 precursor [Homo sapiens] ;	0.949574	0.774086	-0.0746479	0.111211	0.00045701	0.00045415	0.00078298	0.00056991	0.000566013	28	28	43	25	31	0.00048453	0.00055163	0.00077932	0.0005688	0.00059607	25	19	18	5	16.75
PSMD3	26S proteasome non-ATPase regulatory subunit 3 [Homo sapiens]	0.947612	0.768827	-0.0776321	0.114171	0.00054944	0.000676	0.00070053	0.00049333	0.000604825	42	52	48	27	42.25	0.00071457	0.00081444	0.00065932	0.00036472	0.000638263	46	35	19	4	26
SCAMP3	secretory carrier-associated membrane protein 3 isoform 1 [Homo sapiens]	0.947474	0.592017	-0.0778419	0.227665	4.026e-05	0.00014004	0.00015722	0.00019683	0.000133588	2	7	7	7	5.75	0.00011953	0.00014324	0.00016021	0	0.000140993	5	4	3	0	3
	gi|578812808|ref|XP_006715567.1|:PREDICTED: phosphoacetylglucosamine mutase isoform X3 [Homo sapiens] ;gi|7661568|ref|NP_056414.1|:phosphoacetylglucosamine mutase isoform 2 [Homo sapiens] ;	0.945344	0.929787	-0.081089	0.0316165	7.353e-05	4.872e-05	5.469e-05	0	5.898e-05	6	4	4	0	3.5	1.455e-05	8.72e-05	0	8.542e-05	6.239e-05	1	4	0	1	1.5
TMEM33	PREDICTED: transmembrane protein 33 isoform X2 [Homo sapiens]	0.944949	0.344923	-0.0816917	0.462278	0	0.00016863	0.00025242	0.00015801	0.00019302	0	6	8	4	4.5	0.00026867	0.00020123	0.00015004	0.00019712	0.000204265	8	4	2	1	3.75
DNAAF2	protein kintoun isoform 1 [Homo sapiens]	0.94359	0.94961	-0.0837677	0.0224548	7.512e-05	4.147e-05	0	0	5.8295e-05	9	5	0	0	3.5	7.928e-05	0	4.428e-05	0	6.178e-05	8	0	2	0	2.5
RPS16	40S ribosomal protein S16 [Homo sapiens]	0.943193	0.850487	-0.0843744	0.0703321	0.00129188	0.00038038	0.00122773	0.00053463	0.000858655	27	8	23	8	16.5	0.00119314	0.00076599	0.00101537	0.00066698	0.00091037	21	9	8	2	10
ATP5B	ATP synthase subunit beta, mitochondrial precursor [Homo sapiens]	0.940681	0.659571	-0.0882231	0.180738	0.00165069	0.00123355	0.00125225	0.00103287	0.00129234	125	94	85	56	90	0.00142696	0.00108053	0.00133111	0.00165674	0.00137383	91	46	38	18	48.25
DNAJC2	gi|193788632|ref|NP_001123359.1|:dnaJ homolog subfamily C member 2 isoform 2 [Homo sapiens] ;gi|94538370|ref|NP_055192.1|:dnaJ homolog subfamily C member 2 isoform 1 [Homo sapiens] ;	0.939726	0.966391	-0.0896879	0.0148472	0	0	1.372e-05	0	1.372e-05	0	0	1	0	0.25	1.46e-05	0	0	0	1.46e-05	1	0	0	0	0.25
SNTB1	gi|11321640|ref|NP_066301.1|:beta-1-syntrophin [Homo sapiens] ;gi|530389257|ref|XP_005251088.1|:PREDICTED: beta-1-syntrophin isoform X1 [Homo sapiens] ;	0.939689	0.966369	-0.0897452	0.0148568	0	0	1.449e-05	0	1.449e-05	0	0	1	0	0.25	1.542e-05	0	0	0	1.542e-05	1	0	0	0	0.25
SLC38A1	gi|508083057|ref|NP_001265318.1|:sodium-coupled neutral amino acid transporter 1 isoform 1 [Homo sapiens] ;gi|508083059|ref|NP_001265319.1|:sodium-coupled neutral amino acid transporter 1 isoform 2 [Homo sapiens] ;	0.939518	0.966272	-0.0900065	0.0149007	0	0	1.6e-05	0	1.6e-05	0	0	1	0	0.25	1.703e-05	0	0	0	1.703e-05	1	0	0	0	0.25
TMEM11	transmembrane protein 11, mitochondrial [Homo sapiens]	0.939475	0.966247	-0.0900739	0.0149121	0	0	8.118e-05	0	8.118e-05	0	0	2	0	0.5	8.641e-05	0	0	0	8.641e-05	2	0	0	0	0.5
	gi|578819516|ref|XP_006717937.1|:PREDICTED: activating signal cointegrator 1 complex subunit 1 isoform X4 [Homo sapiens] ;gi|578819518|ref|XP_006717938.1|:PREDICTED: activating signal cointegrator 1 complex subunit 1 isoform X5 [Homo sapiens] ;	0.939329	0.966163	-0.0902979	0.0149497	0	0	2.183e-05	0	2.183e-05	0	0	1	0	0.25	2.324e-05	0	0	0	2.324e-05	1	0	0	0	0.25
NR2F2	gi|14149746|ref|NP_066285.1|:COUP transcription factor 2 isoform a [Homo sapiens] ;gi|5032173|ref|NP_005645.1|:COUP transcription factor 1 [Homo sapiens] ;	0.939122	0.966044	-0.0906159	0.0150031	0	0	1.882e-05	0	1.882e-05	0	0	1	0	0.25	2.004e-05	0	0	0	2.004e-05	1	0	0	0	0.25
	gi|578815110|ref|XP_006716326.1|:PREDICTED: tankyrase-1 isoform X1 [Homo sapiens] ;gi|87239981|ref|NP_003738.2|:tankyrase-1 [Homo sapiens] ;	0.938937	0.965938	-0.0908992	0.0150507	0	0	1.184e-05	0	1.184e-05	0	0	2	0	0.5	1.261e-05	0	0	0	1.261e-05	2	0	0	0	0.5
WARS	gi|47419920|ref|NP_998811.1|:tryptophan--tRNA ligase, cytoplasmic isoform b [Homo sapiens] ;gi|578826104|ref|XP_006720312.1|:PREDICTED: tryptophan--tRNA ligase, cytoplasmic isoform X5 [Homo sapiens] ;	0.937633	0.876175	-0.0929053	0.0574092	0.0001787	0.00032288	0.00027186	0.00049919	0.000318158	11	20	15	22	17	0.00030866	0.00028898	0.00064641	0.00011323	0.00033932	16	10	15	1	10.5
	PREDICTED: heat shock cognate 71 kDa protein isoform X1 [Homo sapiens]	0.936418	0.453242	-0.0947751	0.34367	0.00352355	0.00277673	0.00326712	0.00379114	0.00333964	325.838	258.393	270.813	251.009	276.513	0.00383159	0.00309708	0.00345803	0.00387887	0.00356639	298.391	161.009	120.552	51.4636	157.854
ERGIC2	endoplasmic reticulum-Golgi intermediate compartment protein 2 [Homo sapiens]	0.93617	0.617312	-0.0951579	0.209495	0.00011118	0.0001289	8.269e-05	0.0001294	0.000113043	6	7	4	5	5.5	0.00019803	6.592e-05	9.83e-05	0	0.00012075	9	2	2	0	3.25
DDX21	nucleolar RNA helicase 2 isoform 1 [Homo sapiens]	0.935276	0.623561	-0.0965354	0.205121	0.00186994	0.001206	0.00143382	0.00130591	0.00145392	209.594	136.026	144.055	104.8	148.619	0.00170751	0.0015917	0.00173743	0.00118149	0.00155453	161.176	100.297	73.4146	19	88.4718
PRKAG1	gi|332000015|ref|NP_001193638.1|:5'-AMP-activated protein kinase subunit gamma-1 isoform 3 [Homo sapiens] ;gi|4506061|ref|NP_002724.1|:5'-AMP-activated protein kinase subunit gamma-1 isoform 1 [Homo sapiens] ;gi|530400558|ref|XP_005269076.1|:PREDICTED: 5'-AMP-activated protein kinase subunit gamma-1 isoform X1 [Homo sapiens] ;gi|578823977|ref|XP_006719562.1|:PREDICTED: 5'-AMP-activated protein ki…	0.935248	0.775272	-0.0965798	0.110546	0.0002671	0.00010209	0.00011461	8.609e-05	0.000142472	13	5	5	3	6.5	0.00036596	3.655e-05	5.45e-05	0	0.000152337	15	1	1	0	4.25
RBBP9	putative hydrolase RBBP9 [Homo sapiens]	0.933012	0.742358	-0.100032	0.129386	0.00060092	0.00067181	0.0005447	0.0003672	0.000546157	16	18	13	7	13.5	0.00062437	0.00033403	0.00059776	0.00078532	0.00058537	14	5	6	3	7
MSH2	DNA mismatch repair protein Msh2 isoform 1 [Homo sapiens]	0.930944	0.738967	-0.103233	0.131375	0.00038893	0.00028244	0.0002086	0.00041785	0.000324455	52	38	25	40	38.75	0.00047071	0.00037252	0.00023808	0.00031278	0.000348522	53	28	12	6	24.75
ACTG1	gi|316659409|ref|NP_001186883.1|:actin, cytoplasmic 2 [Homo sapiens] ;gi|4501885|ref|NP_001092.1|:actin, cytoplasmic 1 [Homo sapiens] ;gi|578831328|ref|XP_006722111.1|:PREDICTED: actin, cytoplasmic 2 isoform X1 [Homo sapiens] ;	0.928932	0.787875	-0.106355	0.103543	0.00061474	0.00102367	0.00095733	0.00107095	0.000916673	33	55.2973	46.0645	41.1613	43.8808	0.000517	0.00133373	0.00141482	0.00068166	0.000986802	23.3721	40.25	28.6316	5.25	24.3759
DNAJB1	dnaJ homolog subfamily B member 1 [Homo sapiens]	0.92817	0.710079	-0.107539	0.148693	0.00043147	0.00032668	0.00043551	0.00051654	0.00042755	21	16	19	18	18.5	0.00046355	0.00043857	0.00065402	0.00028641	0.000460637	19	12	12	2	11.25
EFHD2	EF-hand domain-containing protein D2 [Homo sapiens]	0.927698	0.707868	-0.108273	0.150048	0.00032018	0.00017355	0.00022731	0.00016262	0.000220915	11	6	7	4	7	0.00020738	0.00031065	0.00023163	0.00020287	0.000238133	6	6	3	1	4
BAG2	BAG family molecular chaperone regulator 2 [Homo sapiens]	0.927562	0.710227	-0.108484	0.148603	0.0004304	0.00098702	0.00099726	0.00101731	0.000857997	13	30	27	22	23	0.0008649	0.00100115	0.00114169	0.00069227	0.000925003	22	17	13	3	13.75
ARHGDIA	rho GDP-dissociation inhibitor 1 isoform a [Homo sapiens]	0.926805	0.706465	-0.109663	0.15091	0.00013698	0.00023821	0.00015281	4.783e-05	0.000143958	4	7	4	1	4	4.066e-05	0.00024365	0.00018167	0	0.000155327	1	4	2	0	1.75
DHCR7	7-dehydrocholesterol reductase [Homo sapiens]	0.926176	0.663836	-0.110642	0.177939	0.00017648	0.00014615	0.00016407	0.00018487	0.000167893	12	10	10	9	10.25	0.0001921	0.00023544	0.00019506	0.0001025	0.000181275	11	9	5	1	6.5
HSDL2	hydroxysteroid dehydrogenase-like protein 2 isoform 1 [Homo sapiens]	0.925777	0.800538	-0.111263	0.0966182	0.00038438	0.00023251	0.00027967	0.00016339	0.000264987	23	14	15	7	14.75	9.922e-05	0.00029728	0.00039898	0.00034945	0.000286233	5	10	9	3	6.75
NDUFA5	gi|4826848|ref|NP_004991.1|:NADH dehydrogenase [ubiquinone] 1 alpha subcomplex subunit 5 isoform 1 [Homo sapiens] ;gi|530385957|ref|XP_005250428.1|:PREDICTED: NADH dehydrogenase [ubiquinone] 1 alpha subcomplex subunit 5 isoform X1 [Homo sapiens] ;gi|538921154|ref|NP_001269348.1|:NADH dehydrogenase [ubiquinone] 1 alpha subcomplex subunit 5 isoform 2 [Homo sapiens] ;gi|538921298|ref|NP_001269349.1|…	0.925675	0.60585	-0.111423	0.217635	0.00018067	0	0	8.411e-05	0.00013239	3	0	0	1	1	0.00014302	0	0	0	0.00014302	2	0	0	0	0.5
HIP1R	gi|48762942|ref|NP_003950.1|:huntingtin-interacting protein 1-related protein [Homo sapiens] ;gi|530401784|ref|XP_005253684.1|:PREDICTED: huntingtin-interacting protein 1-related protein isoform X1 [Homo sapiens] ;	0.923664	0.763312	-0.114559	0.117298	7.195e-05	4.55e-05	4.378e-05	2.741e-05	4.716e-05	11	7	6	3	6.75	3.107e-05	5.817e-05	6.94e-05	4.559e-05	5.10575e-05	4	5	4	1	3.5
ILK	gi|510785740|ref|NP_001265370.1|:integrin-linked protein kinase isoform 2 [Homo sapiens] ;gi|530395319|ref|XP_005252961.1|:PREDICTED: integrin-linked protein kinase isoform X3 [Homo sapiens] ;	0.923609	0.65307	-0.114646	0.18504	7.147e-05	3.551e-05	3.986e-05	0	4.89467e-05	4	2	2	0	2	4.243e-05	6.356e-05	0	0	5.2995e-05	2	2	0	0	1
EEF1G	elongation factor 1-gamma [Homo sapiens]	0.923492	0.603072	-0.114828	0.219631	0.00076731	0.00065131	0.00062419	0.00064748	0.000672572	48	41	35	29	38.25	0.00070234	0.00085305	0.00046644	0.00089134	0.000728293	37	30	11	8	21.5
DDX54	gi|164419743|ref|NP_001104792.1|:ATP-dependent RNA helicase DDX54 isoform 1 [Homo sapiens] ;gi|51094101|ref|NP_076977.3|:ATP-dependent RNA helicase DDX54 isoform 2 [Homo sapiens] ;	0.923114	0.76447	-0.115419	0.116639	0.00021385	0.00022825	0.00018556	0.000177	0.000201165	27	29	21	16	23.25	0.00017869	0.00022542	0.00035716	0.00011041	0.00021792	19	16	17	2	13.5
EIF2B3	translation initiation factor eIF-2B subunit gamma isoform 1 [Homo sapiens]	0.921343	0.774556	-0.11819	0.110947	0.00017001	0.00026109	0.00022415	0.0001511	0.000201587	11	17	13	7	12	0.00033034	0.00024742	8.199e-05	0.00021544	0.000218797	18	9	2	2	7.75
HRNR	gi|57864582|ref|NP_001009931.1|:hornerin [Homo sapiens] ;gi|578800920|ref|XP_006711378.1|:PREDICTED: hornerin isoform X1 [Homo sapiens] ;	0.921075	0.865203	-0.118609	0.0628818	4.902e-05	0.00010961	0.00011212	5.135e-05	8.0525e-05	20	45	41	15	30.25	1.746e-05	4.36e-05	0.00016905	0.00011959	8.7425e-05	6	10	26	7	12.25
GRWD1	glutamate-rich WD repeat-containing protein 1 [Homo sapiens]	0.920981	0.183898	-0.118756	0.735422	9.398e-05	0	0	0	9.398e-05	6	0	0	0	1.5	0.00011159	0.00011144	8.31e-05	0	0.000102043	6	4	2	0	3
ATL2	gi|208610002|ref|NP_001129145.1|:atlastin-2 isoform 2 [Homo sapiens] ;gi|578803082|ref|XP_006712133.1|:PREDICTED: atlastin-2 isoform X1 [Homo sapiens] ;gi|578803084|ref|XP_006712134.1|:PREDICTED: atlastin-2 isoform X2 [Homo sapiens] ;gi|578803086|ref|XP_006712135.1|:PREDICTED: atlastin-2 isoform X3 [Homo sapiens] ;	0.920002	0.0458191	-0.120291	1.33895	5.392e-05	4.763e-05	5.347e-05	3.347e-05	4.71225e-05	4.5	4	4	2	3.625	5.122e-05	0	0	0	5.122e-05	3.6	0	0	0	0.9
MLXIP	gi|111955326|ref|NP_055753.3|:MLX-interacting protein [Homo sapiens] ;gi|578823439|ref|XP_006719353.1|:PREDICTED: MLX-interacting protein isoform X1 [Homo sapiens] ;gi|578823441|ref|XP_006719354.1|:PREDICTED: MLX-interacting protein isoform X2 [Homo sapiens] ;gi|578823443|ref|XP_006719355.1|:PREDICTED: MLX-interacting protein isoform X3 [Homo sapiens] ;	0.91931	0.91718	-0.121376	0.0375456	0	4.532e-05	7.632e-05	2.123e-05	4.76233e-05	0	6	9	2	4.25	2.708e-05	0.00010817	2.016e-05	0	5.18033e-05	3	8	1	0	3
ANKRD50	ankyrin repeat domain-containing protein 50 isoform 1 [Homo sapiens]	0.919173	0.537269	-0.121592	0.269808	1.467e-05	0	0	0	1.467e-05	3	0	0	0	0.75	2.322e-05	8.7e-06	0	0	1.596e-05	4	1	0	0	1.25
	gi|578819671|ref|XP_006717996.1|:PREDICTED: delta-1-pyrroline-5-carboxylate synthase isoform X1 [Homo sapiens] ;gi|62912457|ref|NP_001017423.1|:delta-1-pyrroline-5-carboxylate synthase isoform 2 [Homo sapiens] ;	0.918583	0.412436	-0.122517	0.384643	0.0014938	0.00130108	0.00141164	0.00141138	0.00140448	170	149	144	115	144.5	0.00149209	0.00178186	0.00167823	0.00116365	0.00152896	143	114	72	19	87
GNL3	gi|45593130|ref|NP_055181.3|:guanine nucleotide-binding protein-like 3 isoform 1 [Homo sapiens] ;gi|45643129|ref|NP_996562.1|:guanine nucleotide-binding protein-like 3 isoform 2 [Homo sapiens] ;	0.917899	0.814076	-0.123592	0.0893348	0.00077619	0.00035406	0.00052524	0.0006398	0.000573823	61	28	37	36	40.5	0.00116344	0.00061112	0.00037128	0.00035475	0.000625148	77	27	11	4	29.75
HSP90B1	endoplasmin precursor [Homo sapiens]	0.916823	0.750523	-0.125285	0.124636	5.309e-05	0.00013212	0.00015704	0.00012257	0.000116205	6.10309	15.2824	16.1808	10.0877	11.9135	8.531e-05	9.503e-05	0.00014475	0.0001819	0.000126748	8.25806	6.14118	6.27273	3	5.91799
LOC101060399	PREDICTED: cerebellar degeneration-related protein 2-like [Homo sapiens]	0.916463	0.713615	-0.125852	0.146536	0.00080013	0.00056576	0.00053215	0.00040833	0.000576593	52	37	31	19	34.75	0.00091357	0.00068426	0.00048979	0.00042898	0.00062915	50	25	12	4	22.75
KPRP	keratinocyte proline-rich protein [Homo sapiens]	0.915624	0.399792	-0.127172	0.398166	6.033e-05	3.597e-05	1.346e-05	3.37e-05	3.5865e-05	5	3	1	2	2.75	1.433e-05	0	6.401e-05	0	3.917e-05	1	0	2	0	0.75
CAMK4	calcium/calmodulin-dependent protein kinase type IV [Homo sapiens]	0.914812	0.932932	-0.128453	0.03015	0	1.468e-05	4.943e-05	0	3.2055e-05	0	1	3	0	1	1.754e-05	5.254e-05	0	0	3.504e-05	1	2	0	0	0.75
SNIP1	smad nuclear-interacting protein 1 [Homo sapiens]	0.914025	0.467768	-0.129694	0.32997	5.292e-05	0	3.936e-05	0	4.614e-05	3	0	2	0	1.25	4.189e-05	6.276e-05	4.679e-05	0	5.048e-05	2	2	1	0	1.25
ALG5	gi|215276969|ref|NP_001135836.1|:dolichyl-phosphate beta-glucosyltransferase isoform 2 [Homo sapiens] ;gi|7019323|ref|NP_037470.1|:dolichyl-phosphate beta-glucosyltransferase isoform 1 [Homo sapiens] ;	0.913837	0.0795225	-0.129991	1.09951	0.00014257	9.445e-05	7.952e-05	0.00019912	0.000128915	6	4	3	6	4.75	0.00014107	0	0	0	0.00014107	5	0	0	0	1.25
TRIM25	E3 ubiquitin/ISG15 ligase TRIM25 [Homo sapiens]	0.913637	0.221229	-0.130307	0.655159	0.00041027	0.00050688	0.00044534	0.00046461	0.000456775	37	46	36	30	37.25	0.00055301	0.00045365	0.00052944	0.00046371	0.000499952	42	23	18	6	22.25
UQCRQ	cytochrome b-c1 complex subunit 8 [Homo sapiens]	0.913567	0.731155	-0.130418	0.135991	0.00042596	0.00025398	0.00038017	0.00035696	0.000354267	5	3	4	3	3.75	0.00020232	0.00030308	0.00045196	0.00059378	0.000387785	2	2	2	1	1.75
CTSC	dipeptidyl peptidase 1 isoform a preproprotein [Homo sapiens]	0.912487	0.697596	-0.132123	0.156396	4.526e-05	8.996e-05	0.00015149	0.00012644	0.000103288	3	6	9	6	6	7.166e-05	0.00018787	8.005e-05	0	0.000113193	4	7	2	0	3.25
TTK	gi|23308722|ref|NP_003309.2|:dual specificity protein kinase TTK isoform 1 [Homo sapiens] ;gi|262399361|ref|NP_001160163.1|:dual specificity protein kinase TTK isoform 2 [Homo sapiens] ;	0.912316	0.685397	-0.132394	0.164058	0.00023639	0.00025921	0.00024553	0.00015939	0.00022513	29	32	27	14	25.5	0.00030974	0.00026099	0.00030271	0.00011363	0.000246768	32	18	14	2	16.5
DHX40	gi|261878478|ref|NP_078888.4|:probable ATP-dependent RNA helicase DHX40 isoform 1 [Homo sapiens] ;gi|578831405|ref|XP_006722146.1|:PREDICTED: probable ATP-dependent RNA helicase DHX40 isoform X1 [Homo sapiens] ;	0.912164	0.62616	-0.132634	0.203315	0.00010761	0.00016041	0.00011005	0.00011272	0.000122697	12	18	11	9	12.5	0.00012778	0.00012761	9.515e-05	0.00018751	0.000134512	12	8	4	3	6.75
UBA2	gi|4885649|ref|NP_005490.1|:SUMO-activating enzyme subunit 2 [Homo sapiens] ;gi|530415469|ref|XP_005258460.1|:PREDICTED: SUMO-activating enzyme subunit 2 isoform X1 [Homo sapiens] ;gi|578833817|ref|XP_006723025.1|:PREDICTED: SUMO-activating enzyme subunit 2 isoform X3 [Homo sapiens] ;	0.91184	0.761406	-0.133147	0.118383	0.00019647	0.00020609	9.742e-05	7.623e-05	0.000144052	18	19	8	5	12.5	0.00020738	0.00017474	0.00017372	7.608e-05	0.00015798	16	9	6	1	8
CAP1	adenylyl cyclase-associated protein 1 [Homo sapiens]	0.910807	0.638292	-0.134783	0.194981	0.00038238	0.00020461	0.00024611	0.00022595	0.000264762	26	14	15	11	16.5	0.00027942	0.00036624	0.00031209	0.00020501	0.00029069	16	14	8	2	10
DST	gi|221316618|ref|NP_001138241.1|:dystonin isoform 2 [Homo sapiens] ;gi|221316622|ref|NP_001138242.1|:dystonin isoform 3 [Homo sapiens] ;gi|34577047|ref|NP_899236.1|:dystonin isoform 1 [Homo sapiens] ;gi|530382418|ref|XP_005249367.1|:PREDICTED: dystonin isoform X1 [Homo sapiens] ;gi|530382420|ref|XP_005249368.1|:PREDICTED: dystonin isoform X2 [Homo sapiens] ;gi|530382422|ref|XP_005249369.1|:PREDIC…	0.910553	0.720963	-0.135184	0.142087	9.725e-05	8.441e-05	7.416e-05	4.642e-05	7.556e-05	79	69	54	27	57.25	6.578e-05	5.255e-05	8.49e-05	0.0001287	8.29825e-05	45	24	26	15	27.5
CHMP5	charged multivesicular body protein 5 isoform 1 [Homo sapiens]	0.906503	0.619843	-0.141616	0.207718	0	3.17e-05	7.117e-05	0	5.1435e-05	0	1	2	0	0.75	0	5.674e-05	0	0	5.674e-05	0	1	0	0	0.25
PIH1D1	PIH1 domain-containing protein 1 [Homo sapiens]	0.905598	0.706193	-0.143058	0.151077	0.00050586	0.00100539	0.00080622	0.00084111	0.000789645	21	42	30	25	29.5	0.00054348	0.00064273	0.00095847	0.00134316	0.00087196	19	15	15	8	14.25
CSNK1E	casein kinase I isoform epsilon [Homo sapiens]	0.905061	0.730614	-0.143913	0.136312	0.00015113	0.0001335	0.00011241	9.382e-05	0.000122715	9	8	6	4	6.75	9.97e-05	0.00011948	8.909e-05	0.00023408	0.000135588	5	4	2	2	3.25
	MMS19 nucleotide excision repair protein homolog isoform 1 [Homo sapiens]	0.903507	0.840844	-0.146392	0.0752846	0.00012208	6.74e-05	5.296e-05	4.736e-05	7.245e-05	18	10	7	5	10	0.00017718	6.032e-05	3.598e-05	4.727e-05	8.01875e-05	22	5	2	1	7.5
NDUFS1	gi|316983156|ref|NP_001186912.1|:NADH-ubiquinone oxidoreductase 75 kDa subunit, mitochondrial isoform 4 [Homo sapiens] ;gi|316983160|ref|NP_001186913.1|:NADH-ubiquinone oxidoreductase 75 kDa subunit, mitochondrial isoform 5 [Homo sapiens] ;gi|33519475|ref|NP_004997.4|:NADH-ubiquinone oxidoreductase 75 kDa subunit, mitochondrial isoform 1 precursor [Homo sapiens] ;	0.901707	0.439016	-0.14927	0.357519	0	5.181e-05	3.49e-05	2.913e-05	3.86133e-05	0	5	3	2	2.5	2.476e-05	1.855e-05	5.531e-05	7.267e-05	4.28225e-05	2	1	2	1	1.5
FLNA	filamin-A isoform 2 [Homo sapiens]	0.901655	0.416846	-0.149353	0.380024	0.00953658	0.00609805	0.00627967	0.00666336	0.00714442	3613.55	2325.2	2132.86	1807.73	2469.84	0.00891443	0.00810741	0.00754443	0.00712842	0.00792367	2844.61	1727.03	1077.69	387.534	1509.22
EIF2B4	gi|187607323|ref|NP_751945.2|:translation initiation factor eIF-2B subunit delta isoform 1 [Homo sapiens] ;gi|530368258|ref|XP_005264689.1|:PREDICTED: translation initiation factor eIF-2B subunit delta isoform X1 [Homo sapiens] ;gi|578803252|ref|XP_006712195.1|:PREDICTED: translation initiation factor eIF-2B subunit delta isoform X2 [Homo sapiens] ;gi|78000156|ref|NP_056451.3|:translation initiat…	0.900929	0.571086	-0.150514	0.243299	7.719e-05	2.557e-05	0	0	5.138e-05	6	2	0	0	2	4.583e-05	2.288e-05	0.00010238	0	5.703e-05	3	1	3	0	1.75
CALD1	gi|15149463|ref|NP_149130.1|:caldesmon isoform 4 [Homo sapiens] ;gi|578814641|ref|XP_006716200.1|:PREDICTED: caldesmon isoform X2 [Homo sapiens] ;	0.900609	0.447171	-0.151026	0.349527	0.00016525	0.0002426	0	0	0.000203925	13.2	19.5	0	0	8.175	0.00024529	0	0.00021586	0.00021814	0.00022643	16.5	0	6.5	2.5	6.375
NSF	gi|156564401|ref|NP_006169.2|:vesicle-fusing ATPase [Homo sapiens] ;gi|578841198|ref|XP_006725689.1|:PREDICTED: vesicle-fusing ATPase isoform X1 [Homo sapiens] ;	0.898759	0.733712	-0.153994	0.134474	5.634e-05	0.00010264	9.428e-05	3.934e-05	7.315e-05	6	11	9	3	7.25	7.805e-05	6.681e-05	4.981e-05	0.00013089	8.139e-05	7	4	2	2	3.75
FASTKD5	FAST kinase domain-containing protein 5 [Homo sapiens]	0.898728	0.76263	-0.154044	0.117686	7.315e-05	3.635e-05	2.04e-05	1.277e-05	3.56675e-05	8	4	2	1	3.75	5.429e-05	1.626e-05	4.851e-05	0	3.96867e-05	5	1	2	0	2
UFD1L	ubiquitin fusion degradation protein 1 homolog isoform A [Homo sapiens]	0.898502	0.391071	-0.154407	0.407744	0.00015928	6.784e-05	0.0001777	3.178e-05	0.00010915	7	3	7	1	4.5	8.106e-05	0.0001619	0	0	0.00012148	3	4	0	0	1.75
VPS4B	gi|17865802|ref|NP_004860.2|:vacuolar protein sorting-associated protein 4B [Homo sapiens] ;gi|578832790|ref|XP_006722645.1|:PREDICTED: vacuolar protein sorting-associated protein 4B isoform X1 [Homo sapiens] ;	0.897678	0.381722	-0.15573	0.418252	0	0	8.776e-05	0	8.776e-05	0	0	5	0	1.25	2.18e-05	0	5.217e-05	0.00021932	9.77633e-05	1.16667	0	1.25	2	1.10417
TELO2	gi|225545550|ref|NP_057195.2|:telomere length regulation protein TEL2 homolog [Homo sapiens] ;gi|578828385|ref|XP_006721056.1|:PREDICTED: telomere length regulation protein TEL2 homolog isoform X1 [Homo sapiens] ;	0.897036	0.700767	-0.156762	0.154426	4.173e-05	1.659e-05	2.793e-05	0	2.875e-05	5	2	3	0	2.5	1.982e-05	0	4.428e-05	0	3.205e-05	2	0	2	0	1
SORBS1	gi|530392879|ref|XP_005269497.1|:PREDICTED: sorbin and SH3 domain-containing protein 1 isoform X38 [Homo sapiens] ;gi|578818796|ref|XP_006717640.1|:PREDICTED: sorbin and SH3 domain-containing protein 1 isoform X56 [Homo sapiens] ;gi|578818818|ref|XP_006717651.1|:PREDICTED: sorbin and SH3 domain-containing protein 1 isoform X67 [Homo sapiens] ;gi|578818828|ref|XP_006717656.1|:PREDICTED: sorbin and…	0.89591	0.758163	-0.158575	0.120237	7.461e-05	0.0001761	0.00014567	6.513e-05	0.000115377	8	19	14	5	11.5	0.00011075	0.00021567	0.0001237	6.501e-05	0.000128783	10	13	5	1	7.25
PRKDC	DNA-dependent protein kinase catalytic subunit isoform 1 [Homo sapiens]	0.89458	0.493831	-0.160718	0.306421	0.00053645	0.00056505	0.00040402	0.00044436	0.00048747	317	336	214	188	263.75	0.00069126	0.00060204	0.00052072	0.00036564	0.000544915	344	200	116	31	172.75
C1QBP	complement component 1 Q subcomponent-binding protein, mitochondrial precursor [Homo sapiens]	0.893769	0.747739	-0.162026	0.12625	0.00066885	0.00091083	0.00052509	0.00048439	0.00064729	27	37	19	14	24.25	0.0013237	0.00066096	0.00039426	0.00051798	0.000724225	45	15	6	3	17.25
CIAPIN1	anamorsin [Homo sapiens]	0.892598	0.597635	-0.163917	0.223564	0.00118668	0.0012015	0.00144878	0.00075053	0.00114687	53	54	58	24	47.25	0.00071785	0.00135413	0.00166299	0.00140451	0.00128487	27	34	28	9	24.5
PSMA4	proteasome subunit alpha type-4 isoform 1 [Homo sapiens]	0.891369	0.744358	-0.165905	0.128218	0.00032118	0.00037237	0.00032846	0.00011215	0.00028354	12	14	11	3	10	0.00019069	0.00023805	0.00028399	0.00055965	0.000318095	6	5	4	3	4.5
CBX6	gi|46852392|ref|NP_055107.3|:chromobox protein homolog 6 [Homo sapiens] ;gi|530419686|ref|XP_005261469.1|:PREDICTED: chromobox protein homolog 6 isoform X1 [Homo sapiens] ;	0.891207	0.605771	-0.166167	0.217691	1.696e-05	0	1.892e-05	0	1.794e-05	1	0	1	0	0.5	2.013e-05	0	0	0	2.013e-05	1	0	0	0	0.25
ORC5	gi|32454754|ref|NP_859531.1|:origin recognition complex subunit 5 isoform 2 [Homo sapiens] ;gi|4505525|ref|NP_002544.1|:origin recognition complex subunit 5 isoform 1 [Homo sapiens] ;	0.888281	0.607874	-0.170912	0.216187	0	2.143e-05	2.405e-05	0	2.274e-05	0	1	1	0	0.5	2.56e-05	0	0	0	2.56e-05	1	0	0	0	0.25
ZBTB3	zinc finger and BTB domain-containing protein 3 [Homo sapiens]	0.888235	0.607915	-0.170986	0.216157	0	1.209e-05	1.358e-05	0	1.2835e-05	0	1	1	0	0.5	1.445e-05	0	0	0	1.445e-05	1	0	0	0	0.25
PBK	gi|525507092|ref|NP_001265874.1|:lymphokine-activated killer T-cell-originated protein kinase isoform 2 [Homo sapiens] ;gi|578815394|ref|XP_006716431.1|:PREDICTED: lymphokine-activated killer T-cell-originated protein kinase isoform X1 [Homo sapiens] ;	0.888198	0.607937	-0.171048	0.216141	0	4.169e-05	4.681e-05	0	4.425e-05	0	2	2	0	1	4.982e-05	0	0	0	4.982e-05	2	0	0	0	0.5
ZWILCH	gi|110578655|ref|NP_060445.3|:protein zwilch homolog isoform 1 [Homo sapiens] ;gi|568215455|ref|NP_001274751.1|:protein zwilch homolog isoform 2 [Homo sapiens] ;	0.888177	0.60795	-0.171081	0.216132	0	1.175e-05	1.319e-05	0	1.247e-05	0	1	1	0	0.5	1.404e-05	0	0	0	1.404e-05	1	0	0	0	0.25
MOCS3	adenylyltransferase and sulfurtransferase MOCS3 [Homo sapiens]	0.887996	0.608077	-0.171376	0.216042	0	3.018e-05	3.388e-05	0	3.203e-05	0	2	2	0	1	3.607e-05	0	0	0	3.607e-05	2	0	0	0	0.5
SNCA	gi|225690604|ref|NP_001139527.1|:alpha-synuclein isoform NACP140 [Homo sapiens] ;gi|6806898|ref|NP_009292.1|:alpha-synuclein isoform NACP112 [Homo sapiens] ;	0.88559	0.717897	-0.175289	0.143938	0	4.959e-05	0.00022267	0.00013938	0.000137213	0	1	4	2	1.75	0	0.00017752	0.00013236	0	0.00015494	0	2	1	0	0.75
PKP4	gi|53829374|ref|NP_003619.2|:plakophilin-4 isoform a [Homo sapiens] ;gi|53829376|ref|NP_001005476.1|:plakophilin-4 isoform b [Homo sapiens] ;	0.88558	0.165344	-0.175306	0.781613	0	4.077e-05	5.884e-05	0	4.9805e-05	0	7	9	0	4	9.047e-05	6.255e-05	3.109e-05	4.085e-05	5.624e-05	13	6	2	1	5.5
PSMC2	26S protease regulatory subunit 7 isoform 1 [Homo sapiens]	0.885553	0.401218	-0.17535	0.396619	0.0005808	0.00068939	0.00062995	0.0006084	0.000627135	36	43	35	27	35.25	0.0007663	0.00080354	0.00081311	0.00044979	0.000708185	40	28	19	4	22.75
ZNF185	gi|296010977|ref|NP_001171584.1|:zinc finger protein 185 isoform 7 [Homo sapiens] ;gi|296010981|ref|NP_001171586.1|:zinc finger protein 185 isoform 9 [Homo sapiens] ;gi|530422903|ref|XP_005274787.1|:PREDICTED: zinc finger protein 185 isoform X1 [Homo sapiens] ;gi|530422905|ref|XP_005274788.1|:PREDICTED: zinc finger protein 185 isoform X2 [Homo sapiens] ;gi|530422907|ref|XP_005274789.1|:PREDICTED:…	0.882631	0.735522	-0.180118	0.133405	0.00011941	0.00010383	8.326e-05	2.085e-05	8.18375e-05	8	7	5	1	5.25	5.317e-05	0.00010621	0.00011878	0	9.272e-05	3	4	3	0	2.5
AP2A1	gi|19913414|ref|NP_055018.2|:AP-2 complex subunit alpha-1 isoform 1 [Homo sapiens] ;gi|19913416|ref|NP_570603.2|:AP-2 complex subunit alpha-1 isoform 2 [Homo sapiens] ;	0.882184	0.664673	-0.180849	0.177392	0.00015095	0.00010031	7.977e-05	5.287e-05	9.5975e-05	21.1111	14.1176	10	5.29412	12.6307	0.00013585	0.00014646	8.309e-05	6.977e-05	0.000108793	16	11.5152	4.38095	1.4	8.32403
	PREDICTED: 60S ribosomal protein L6 isoform X5 [Homo sapiens]	0.881935	0.571002	-0.181256	0.243363	0.00089747	0.00053029	0.00064945	0.00091471	0.00074798	37	22	24	27	27.5	0.00095049	0.00077663	0.00115815	0.00050718	0.000848112	33	18	18	3	18
ACTN1	gi|194097350|ref|NP_001123476.1|:alpha-actinin-1 isoform a [Homo sapiens] ;gi|194097352|ref|NP_001123477.1|:alpha-actinin-1 isoform c [Homo sapiens] ;gi|4501891|ref|NP_001093.1|:alpha-actinin-1 isoform b [Homo sapiens] ;	0.880885	0.893364	-0.182974	0.0489718	0	2.309e-05	2.387e-05	0	2.348e-05	0	3.04	2.8	0	1.46	3.858e-05	1.473e-05	0	0	2.6655e-05	4.25121	1.08333	0	0	1.33364
WDR34	WD repeat-containing protein 34 [Homo sapiens]	0.880214	0.475858	-0.184073	0.322522	3.91e-05	1.295e-05	0	0	2.6025e-05	3	1	0	0	1	3.095e-05	2.318e-05	3.457e-05	0	2.95667e-05	2	1	1	0	1
HIST1H2BB	gi|10800140|ref|NP_066406.1|:histone H2B type 1-B [Homo sapiens] ;gi|16306566|ref|NP_003518.2|:histone H2B type 1-O [Homo sapiens] ;gi|20336754|ref|NP_066402.2|:histone H2B type 1-J [Homo sapiens] ;gi|28173554|ref|NP_778225.1|:histone H2B type 3-B [Homo sapiens] ;gi|4504277|ref|NP_003519.1|:histone H2B type 2-E [Homo sapiens] ;	0.878281	0.75894	-0.187246	0.119793	0.00022177	0.00033057	0.00049482	0.00030974	0.000339225	4	6	8	4	5.5	0.00032917	0.00029586	0.00014707	0.00077285	0.000386237	5	3	1	2	2.75
CAPZA1	F-actin-capping protein subunit alpha-1 [Homo sapiens]	0.877274	0.561979	-0.188901	0.25028	0.00031404	0.00055827	0.00061842	0.00029475	0.00044637	12.8571	23	22.6944	8.64	16.7979	0.00044383	0.00067344	0.00040726	0.00051073	0.000508815	15.3023	15.5	6.28571	3	10.022
RAD21	double-strand-break repair protein rad21 homolog [Homo sapiens]	0.877031	0.770402	-0.1893	0.113283	0.00017713	8.801e-05	6.175e-05	3.093e-05	8.9455e-05	16	8	5	2	7.75	0.00014461	3.939e-05	0.00014683	7.716e-05	0.000101998	11	2	5	1	4.75
ERCC6L	DNA excision repair protein ERCC-6-like [Homo sapiens]	0.876563	0.366964	-0.190071	0.435377	0.00043032	0.00051093	0.00046761	0.00032783	0.000434172	77	92	75	42	71.5	0.00049107	0.00062628	0.00047438	0.00038952	0.000495312	74	63	32	10	44.75
RRAGA	ras-related GTP-binding protein A [Homo sapiens]	0.873736	0.701943	-0.194731	0.153698	0.00011159	6.654e-05	9.96e-05	0	9.25767e-05	5	3	4	0	3	0.00013251	7.94e-05	0	0	0.000105955	5	2	0	0	1.75
COPB1	coatomer subunit beta [Homo sapiens]	0.873472	0.514148	-0.195167	0.288912	0.00049113	0.00058275	0.00061333	0.00049143	0.00054466	67	80	75	48	67.5	0.00053096	0.00080841	0.00079722	0.00035764	0.000623558	61	62	41	7	42.75
SURF4	gi|19557691|ref|NP_149351.1|:surfeit locus protein 4 isoform 1 [Homo sapiens] ;gi|526118147|ref|NP_001267717.1|:surfeit locus protein 4 isoform 2 [Homo sapiens] ;gi|526118153|ref|NP_001267718.1|:surfeit locus protein 4 isoform 3 [Homo sapiens] ;gi|578817821|ref|XP_006717320.1|:PREDICTED: surfeit locus protein 4 isoform X1 [Homo sapiens] ;	0.873444	0.701386	-0.195214	0.154043	7.791e-05	0.00012903	0.0002028	0.00018136	0.000147775	3	5	7	5	5	0.00018502	0.00018477	0.00013777	0	0.000169187	6	4	2	0	3
	gi|578813710|ref|XP_006715869.1|:PREDICTED: septin-7 isoform X1 [Homo sapiens] ;gi|578813712|ref|XP_006715870.1|:PREDICTED: septin-7 isoform X2 [Homo sapiens] ;gi|578813714|ref|XP_006715871.1|:PREDICTED: septin-7 isoform X3 [Homo sapiens] ;gi|578813716|ref|XP_006715872.1|:PREDICTED: septin-7 isoform X4 [Homo sapiens] ;gi|578813718|ref|XP_006715873.1|:PREDICTED: septin-7 isoform X5 [Homo sapiens] ;	0.873163	0.106782	-0.195677	0.971501	0.00057695	0.00054234	0.0004523	0.00047913	0.00051268	37	35	26	22	30	0.00062954	0.00063795	0.00053771	0.00054341	0.000587153	34	23	13	5	18.75
CCSER2	serine-rich coiled-coil domain-containing protein 2 isoform 1 [Homo sapiens]	0.872896	0.269508	-0.196119	0.569428	6.67e-06	6.63e-06	7.44e-06	0	6.91333e-06	1	1	1	0	0.75	7.92e-06	0	0	0	7.92e-06	1	0	0	0	0.25
RPL13A	60S ribosomal protein L13a isoform 1 [Homo sapiens]	0.872711	0.692982	-0.196424	0.159278	0.00030971	0.00041037	0.00026874	0.00043257	0.000355348	9	12	7	9	9.25	0.00036777	0.00030606	0.0005477	0	0.000407177	9	5	6	0	5
PPP3CA	gi|194688147|ref|NP_001124163.1|:serine/threonine-protein phosphatase 2B catalytic subunit alpha isoform isoform 2 [Homo sapiens] ;gi|194688149|ref|NP_001124164.1|:serine/threonine-protein phosphatase 2B catalytic subunit alpha isoform isoform 3 [Homo sapiens] ;gi|6715568|ref|NP_000935.1|:serine/threonine-protein phosphatase 2B catalytic subunit alpha isoform isoform 1 [Homo sapiens] ;	0.872703	0.269625	-0.196437	0.569239	2.734e-05	2.717e-05	3.05e-05	0	2.83367e-05	2	2	2	0	1.5	3.247e-05	0	0	0	3.247e-05	2	0	0	0	0.5
COPA	coatomer subunit alpha isoform 2 [Homo sapiens]	0.87233	0.221488	-0.197055	0.654649	0.00029107	0.00042537	0.00041387	0.00039857	0.00038222	51	75	65	50	60.25	0.00039307	0.0005076	0.00045418	0.00039779	0.00043816	58	50	30	10	37
PIK3AP1	gi|45505139|ref|NP_689522.2|:phosphoinositide 3-kinase adapter protein 1 [Homo sapiens] ;gi|530393003|ref|XP_005269556.1|:PREDICTED: phosphoinositide 3-kinase adapter protein 1 isoform X2 [Homo sapiens] ;	0.872085	0.631781	-0.197459	0.199434	0	1.725e-05	9.68e-06	0	1.3465e-05	0	2	1	0	0.75	0	1.544e-05	0	0	1.544e-05	0	1	0	0	0.25
PEX1	gi|4505725|ref|NP_000457.1|:peroxisome biogenesis factor 1 isoform 1 [Homo sapiens] ;gi|530386077|ref|XP_005250486.1|:PREDICTED: peroxisome biogenesis factor 1 isoform X1 [Homo sapiens] ;gi|544186102|ref|NP_001269606.1|:peroxisome biogenesis factor 1 isoform 2 [Homo sapiens] ;	0.871781	0.78232	-0.197963	0.106616	7.623e-05	4.329e-05	6.074e-05	7.6e-06	4.6965e-05	14	8	10	1	8.25	0.00010991	3.874e-05	2.889e-05	3.795e-05	5.38725e-05	17	4	2	1	6
PEX14	gi|4758896|ref|NP_004556.1|:peroxisomal membrane protein PEX14 [Homo sapiens] ;gi|530360585|ref|XP_005263527.1|:PREDICTED: peroxisomal membrane protein PEX14 isoform X3 [Homo sapiens] ;gi|578799236|ref|XP_006710748.1|:PREDICTED: peroxisomal membrane protein PEX14 isoform X4 [Homo sapiens] ;	0.870905	0.767532	-0.199413	0.114903	0	0.00014731	4.134e-05	2.588e-05	7.151e-05	0	8	2	1	2.75	0	6.592e-05	9.83e-05	0	8.211e-05	0	2	2	0	1
VPS33B	vacuolar protein sorting-associated protein 33B isoform 1 [Homo sapiens]	0.870719	0.665477	-0.199722	0.176867	0.00011322	0.00022502	0.00035367	0.00017395	0.000216465	10	20	28	11	17.25	0.00018822	0.0002014	0.00021023	0.00039457	0.000248605	14	10	7	5	9
AHNAK	gi|530397283|ref|XP_005274299.1|:PREDICTED: neuroblast differentiation-associated protein AHNAK isoform X3 [Homo sapiens] ;gi|530397291|ref|XP_005274303.1|:PREDICTED: neuroblast differentiation-associated protein AHNAK isoform X7 [Homo sapiens] ;	0.870051	0.281685	-0.200827	0.550236	0.00021742	0.00010562	0	0.00010019	0.000141077	179.333	87.6667	0	59.1667	81.5417	0.00017923	0.00016641	0.00019028	0.00011267	0.000162148	124.5	77.1667	59.1667	13.3333	68.5417
	PREDICTED: E3 ubiquitin-protein ligase XIAP isoform X1 [Homo sapiens]	0.869972	0.790793	-0.200959	0.101937	1.406e-05	0.00011174	0.00010977	3.926e-05	6.87075e-05	1	8	7	2	4.5	5.007e-05	7.501e-05	0.00011185	0	7.89767e-05	3	3	3	0	2.25
PSMC4	26S protease regulatory subunit 6B isoform 1 [Homo sapiens]	0.869798	0.685799	-0.201248	0.163803	0.00053479	0.00033215	0.00022373	0.00025676	0.000336858	32	20	12	11	18.75	0.00063504	0.00023782	0.00044331	0.00023296	0.000387282	32	8	10	2	13
APOOL	gi|116812610|ref|NP_940852.3|:apolipoprotein O-like precursor [Homo sapiens] ;gi|530421945|ref|XP_005262137.1|:PREDICTED: apolipoprotein O-like isoform X1 [Homo sapiens] ;	0.868013	0.415229	-0.204212	0.381712	2.607e-05	2.59e-05	0	0.00010922	5.373e-05	1	1	0	3	1.25	6.19e-05	0	0	0	6.19e-05	2	0	0	0	0.5
	PREDICTED: putative ATP-dependent RNA helicase DHX30 isoform X1 [Homo sapiens]	0.867421	0.421812	-0.205195	0.374881	0.00021152	0.00027836	0.00022322	0.00018364	0.000224185	37	49	35	23	36	0.00024437	0.00020337	0.00022746	0.0003586	0.00025845	36	20	15	9	20
TBK1	PREDICTED: serine/threonine-protein kinase TBK1 isoform X2 [Homo sapiens]	0.86593	0.824302	-0.207677	0.0839139	0.0001629	0.00010475	5.345e-05	1.338e-05	8.362e-05	17	11	5	1	8.5	0.00017068	6.818e-05	5.084e-05	0	9.65667e-05	15	4	2	0	5.25
ABCF2	gi|27881506|ref|NP_009120.1|:ATP-binding cassette sub-family F member 2 isoform a [Homo sapiens] ;gi|578813848|ref|XP_006715887.1|:PREDICTED: ATP-binding cassette sub-family F member 2 isoform X2 [Homo sapiens] ;	0.864593	0.0884968	-0.209906	1.05307	0.00050459	0.00047914	0.00050038	0.00045417	0.00048457	45	43	40	29	39.25	0.00049265	0.00061831	0.00050565	0.00062523	0.00056046	37	31	17	8	23.25
WASL	neural Wiskott-Aldrich syndrome protein [Homo sapiens]	0.86378	0.796139	-0.211265	0.0990112	0.00019366	6.873e-05	0.00012346	5.796e-05	0.000110953	14	5	8	3	7.5	0.00021354	9.842e-05	7.339e-05	0	0.00012845	13	4	2	0	4.75
PSMC1	26S protease regulatory subunit 4 [Homo sapiens]	0.86362	0.181147	-0.211532	0.741969	0.00046042	0.00045754	0.00038967	0.00028827	0.000398975	29	29	22	13	23.25	0.00049017	0.00045186	0.00046326	0.00044263	0.00046198	26	16	11	4	14.25
ARGLU1	arginine and glutamate-rich protein 1 [Homo sapiens]	0.861713	0.192424	-0.214721	0.715741	0.00010236	0	0	0	0.00010236	4	0	0	0	1	0.00015193	0.00013655	6.788e-05	0	0.000118787	5	3	1	0	2.25
MAPRE1	microtubule-associated protein RP/EB family member 1 [Homo sapiens]	0.86164	0.635574	-0.214844	0.196834	0.00025886	0.00040032	0.00061068	0.00029125	0.000390278	9.93103	15.4545	21	8	13.5964	0.00045102	0.00062594	0.00055315	0.00018168	0.000452948	14.5714	13.5	8	1	9.26786
SDF2	stromal cell-derived factor 2 precursor [Homo sapiens]	0.86153	0.53373	-0.215027	0.272678	0.00052972	0.00036191	0.00070178	0.00060114	0.000548637	16	11	19	13	14.75	0.0005897	0.00053002	0.00096604	0.00046151	0.000636817	15	9	11	2	9.25
LLPH	protein LLP homolog [Homo sapiens]	0.860708	0.654596	-0.216405	0.184027	0.00064984	0.00021526	0.00072497	0.00052944	0.000529878	12	4	12	7	8.75	0.00102886	0.00048163	0.00057459	0.00037744	0.00061563	16	5	4	1	6.5
FASTKD2	FAST kinase domain-containing protein 2 [Homo sapiens]	0.857612	0.758045	-0.221603	0.120305	2.952e-05	1.955e-05	1.098e-05	0	2.00167e-05	3	2	1	0	1.5	1.168e-05	3.5e-05	0	0	2.334e-05	1	2	0	0	0.75
CORO1B	coronin-1B [Homo sapiens]	0.85717	0.552891	-0.222347	0.257361	0.0002	0.00026973	0.00023906	5.986e-05	0.000192163	14	19	15	3	12.75	0.00025445	0.00017788	0.00026526	0.00019914	0.000224182	15	7	7	2	7.75
PSMD10	26S proteasome non-ATPase regulatory subunit 10 isoform 1 [Homo sapiens]	0.85621	0.304812	-0.223964	0.515967	6.182e-05	9.215e-05	6.897e-05	4.317e-05	6.65275e-05	2	3	2	1	2	7.341e-05	0	8.199e-05	0	7.77e-05	2	0	1	0	0.75
PYGL	gi|255653002|ref|NP_001157412.1|:glycogen phosphorylase, liver form isoform 2 [Homo sapiens] ;gi|71037379|ref|NP_002854.3|:glycogen phosphorylase, liver form isoform 1 [Homo sapiens] ;	0.85606	0.780646	-0.224216	0.107546	6.015e-05	7.685e-05	8.627e-05	1.5e-05	5.95675e-05	7	9	9	1.25	6.5625	9.183e-05	7.133e-05	4.559e-05	0	6.95833e-05	9	4.66667	2	0	3.91667
PRIM1	DNA primase small subunit [Homo sapiens]	0.855859	0.0741136	-0.224555	1.1301	8.316e-05	0.00014876	0.00014845	9.292e-05	0.000118323	5	9	8	4	6.5	0.00013825	0	0	0	0.00013825	7	0	0	0	1.75
PSMC6	26S protease regulatory subunit 10B [Homo sapiens]	0.855338	0.40446	-0.225433	0.393125	0	5.168e-05	0.00013537	2.421e-05	7.042e-05	0	3	7	1	2.75	8.233e-05	0	0	0	8.233e-05	4	0	0	0	1
GBF1	gi|313747582|ref|NP_001186307.1|:Golgi-specific brefeldin A-resistance guanine nucleotide exchange factor 1 isoform 2 [Homo sapiens] ;gi|313747584|ref|NP_001186308.1|:Golgi-specific brefeldin A-resistance guanine nucleotide exchange factor 1 isoform 3 [Homo sapiens] ;gi|4758416|ref|NP_004184.1|:Golgi-specific brefeldin A-resistance guanine nucleotide exchange factor 1 isoform 1 [Homo sapiens] ;gi…	0.855038	0.572707	-0.225939	0.242068	3.764e-05	8.977e-05	7.558e-05	2.628e-05	5.73175e-05	10	24	18	5	14.25	7.598e-05	5.356e-05	5.99e-05	7.87e-05	6.7035e-05	17	8	6	3	8.5
AAK1	AP2-associated protein kinase 1 [Homo sapiens]	0.853916	0.121923	-0.227834	0.913915	0.00015265	0.0001517	0.00018652	0.00018275	0.000168405	21	21	23	18	20.75	0.00018127	0.00023139	0.00017354	0.00020266	0.000197215	21	17.8947	9	4	12.9737
IGBP1	immunoglobulin-binding protein 1 [Homo sapiens]	0.851664	0.6183	-0.231643	0.208801	4.121e-05	8.191e-05	0.00011495	0.00014391	9.5495e-05	2	4	5	5	4	4.894e-05	0.00014662	0.00010932	0.00014363	0.000112128	2	4	2	1	2.25
ARHGEF28	gi|295148070|ref|NP_001171164.1|:rho guanine nucleotide exchange factor 28 isoform 2 [Homo sapiens] ;gi|295148073|ref|NP_001073948.2|:rho guanine nucleotide exchange factor 28 isoform 1 [Homo sapiens] ;gi|346986273|ref|NP_001231293.1|:rho guanine nucleotide exchange factor 28 isoform 3 [Homo sapiens] ;gi|530379434|ref|XP_005248625.1|:PREDICTED: rho guanine nucleotide exchange factor 28 isoform X1…	0.850211	0.800396	-0.234108	0.0966951	1.639e-05	2.036e-05	1.371e-05	0	1.682e-05	4	5	3	0	3	1.946e-05	7.29e-06	3.26e-05	0	1.97833e-05	4	1	3	0	2
GARS	glycine--tRNA ligase precursor [Homo sapiens]	0.850184	0.268215	-0.234153	0.571517	0.00054827	0.00039454	0.00036911	0.0004621	0.000443505	58	42	35	35	42.5	0.00050512	0.00038674	0.0006018	0.00059297	0.000521657	45	23	24	9	25.25
TUBB	tubulin beta chain [Homo sapiens]	0.850009	0.143294	-0.23445	0.843771	0.00551249	0.00728661	0.00732245	0.00821008	0.00708291	350.364	466.04	417.168	373.61	401.795	0.00938698	0.00885169	0.0078302	0.00726211	0.00833275	502.439	316.282	187.616	66.223	268.14
FSCN1	fascin [Homo sapiens]	0.849728	0.295293	-0.234928	0.529747	0.00015587	0.00021122	0.00028455	0.00031665	0.000242073	11	15	18	16	15	0.00030287	0.00027726	0.00026311	0.00029629	0.000284882	18	11	7	3	9.75
OSBPL8	gi|530399707|ref|XP_005268678.1|:PREDICTED: oxysterol-binding protein-related protein 8 isoform X1 [Homo sapiens] ;gi|530399709|ref|XP_005268679.1|:PREDICTED: oxysterol-binding protein-related protein 8 isoform X2 [Homo sapiens] ;gi|578823265|ref|XP_006719285.1|:PREDICTED: oxysterol-binding protein-related protein 8 isoform X4 [Homo sapiens] ;gi|578823267|ref|XP_006719286.1|:PREDICTED: oxysterol-…	0.849498	0.414207	-0.235318	0.382783	0.00022002	0.00013275	0.00024546	0.00010975	0.000176995	28	17	28	10	20.75	0.00022394	0.00022364	0.00016675	0.00021908	0.000208352	24	16	8	4	13
COPG1	coatomer subunit gamma-1 [Homo sapiens]	0.846821	0.508951	-0.239871	0.293324	0.00025334	0.00030094	0.00027032	0.00021942	0.000261005	31.6957	37.8889	30.3158	19.6552	29.8889	0.00044727	0.00038525	0.00023322	0.00016713	0.000308217	47.125	27.0968	11	3	22.0554
EIF3M	eukaryotic translation initiation factor 3 subunit M [Homo sapiens]	0.846798	0.749073	-0.23991	0.125476	7.471e-05	0.0002413	0.00037508	7.826e-05	0.000192338	4	13	18	3	9.5	0.00013308	0.00019935	0.00044592	0.00013019	0.000227135	6	6	9	1	5.5
ATP6V1H	gi|47717104|ref|NP_057025.2|:V-type proton ATPase subunit H isoform 1 [Homo sapiens] ;gi|578815670|ref|XP_006716518.1|:PREDICTED: V-type proton ATPase subunit H isoform X1 [Homo sapiens] ;	0.844818	0.789722	-0.243288	0.102526	0.0001591	0.0001581	6.454e-05	0.000101	0.000120685	11	11	4	5	7.75	0.00017174	0.00018009	7.673e-05	0	0.000142853	10	7	2	0	4.75
BCKDHA	gi|11386135|ref|NP_000700.1|:2-oxoisovalerate dehydrogenase subunit alpha, mitochondrial isoform 1 precursor [Homo sapiens] ;gi|258645172|ref|NP_001158255.1|:2-oxoisovalerate dehydrogenase subunit alpha, mitochondrial isoform 2 precursor [Homo sapiens] ;	0.844655	0.210428	-0.243565	0.676896	1.57e-05	0.0001092	0.00010508	2.193e-05	6.29775e-05	1	7	6	1	3.75	7.456e-05	0	0	0	7.456e-05	4	0	0	0	1
MYO9A	gi|156119615|ref|NP_008832.2|:unconventional myosin-IXa [Homo sapiens] ;gi|530405896|ref|XP_005254461.1|:PREDICTED: unconventional myosin-IXa isoform X1 [Homo sapiens] ;gi|578827005|ref|XP_006720603.1|:PREDICTED: unconventional myosin-IXa isoform X3 [Homo sapiens] ;	0.844072	0.586608	-0.244562	0.231652	1.097e-05	3.269e-05	1.529e-05	0	1.965e-05	4	12	5	0	5.25	6.186e-05	4.88e-06	7.27e-06	1.911e-05	2.328e-05	19	1	1	1	5.5
	gi|578831012|ref|XP_006721994.1|:PREDICTED: hematological and neurological expressed 1 protein isoform X1 [Homo sapiens] ;gi|7705877|ref|NP_057269.1|:hematological and neurological expressed 1 protein isoform 1 [Homo sapiens] ;	0.843468	0.749765	-0.245595	0.125075	0.00041537	0.00063791	0.00105316	0.00168768	0.00094853	11	17	25	32	21.25	0.00049323	0.00107469	0.00240395	0.00052637	0.00112456	11	16	24	2	13.25
JMY	gi|289547556|ref|NP_689618.4|:junction-mediating and -regulatory protein [Homo sapiens] ;gi|530379146|ref|XP_005248487.1|:PREDICTED: junction-mediating and -regulatory protein isoform X1 [Homo sapiens] ;gi|578810125|ref|XP_006714593.1|:PREDICTED: junction-mediating and -regulatory protein isoform X2 [Homo sapiens] ;	0.84334	0.908584	-0.245814	0.0416349	2.121e-05	0	0	0	2.121e-05	3	0	0	0	0.75	0	2.515e-05	0	0	2.515e-05	0	2	0	0	0.5
PGAM1	phosphoglycerate mutase 1 [Homo sapiens]	0.843069	0.441818	-0.246277	0.354757	0.00082509	0.00073793	0.00076707	0.00026889	0.000649745	30	27	25	7	22.25	0.00068582	0.00063598	0.0008025	0.00095846	0.00077069	21	13	11	5	12.5
GMPS	GMP synthase [glutamine-hydrolyzing] [Homo sapiens]	0.842702	0.525995	-0.246905	0.279018	0.00016129	0.0002304	0.00038236	0.00038014	0.000288548	16	23	34	27	25	0.00017955	0.00034069	0.00042783	0.00042156	0.000342407	15	19	16	6	14
AMZ2	gi|530412360|ref|XP_005257489.1|:PREDICTED: archaemetzincin-2 isoform X1 [Homo sapiens] ;gi|573459738|ref|NP_001275985.1|:archaemetzincin-2 isoform 1 [Homo sapiens] ;gi|578831034|ref|XP_006722003.1|:PREDICTED: archaemetzincin-2 isoform X8 [Homo sapiens] ;gi|75812976|ref|NP_001028746.1|:archaemetzincin-2 isoform 2 [Homo sapiens] ;	0.842536	0.908081	-0.24719	0.0418753	1.648e-05	0	0	0	1.648e-05	1	0	0	0	0.25	1.956e-05	0	0	0	1.956e-05	1	0	0	0	0.25
GC	gi|324021743|ref|NP_001191235.1|:vitamin D-binding protein isoform 1 precursor [Homo sapiens] ;gi|324021745|ref|NP_001191236.1|:vitamin D-binding protein isoform 3 precursor [Homo sapiens] ;gi|578809023|ref|XP_006714240.1|:PREDICTED: vitamin D-binding protein isoform X1 [Homo sapiens] ;	0.842286	0.907925	-0.247618	0.0419501	1.474e-05	0	0	0	1.474e-05	1	0	0	0	0.25	1.75e-05	0	0	0	1.75e-05	1	0	0	0	0.25
DCAF12	gi|22218619|ref|NP_056212.1|:DDB1- and CUL4-associated factor 12 [Homo sapiens] ;gi|578816454|ref|XP_006716815.1|:PREDICTED: DDB1- and CUL4-associated factor 12 isoform X1 [Homo sapiens] ;	0.842163	0.907848	-0.247829	0.0419869	3.084e-05	0	0	0	3.084e-05	2	0	0	0	0.5	3.662e-05	0	0	0	3.662e-05	2	0	0	0	0.5
MRPS5	28S ribosomal protein S5, mitochondrial [Homo sapiens]	0.842146	0.907838	-0.247857	0.0419919	3.249e-05	0	0	0	3.249e-05	2	0	0	0	0.5	3.858e-05	0	0	0	3.858e-05	2	0	0	0	0.5
EDEM3	gi|163310725|ref|NP_079467.3|:ER degradation-enhancing alpha-mannosidase-like protein 3 precursor [Homo sapiens] ;gi|530365404|ref|XP_005245556.1|:PREDICTED: ER degradation-enhancing alpha-mannosidase-like protein 3 isoform X2 [Homo sapiens] ;	0.842135	0.90783	-0.247877	0.0419953	1.499e-05	0	0	0	1.499e-05	2	0	0	0	0.5	1.78e-05	0	0	0	1.78e-05	2	0	0	0	0.5
	gi|571026606|ref|NP_001275685.1|:BRISC and BRCA1-A complex member 1 isoform 1 [Homo sapiens] ;gi|571026657|ref|NP_001275686.1|:BRISC and BRCA1-A complex member 1 isoform 2 [Homo sapiens] ;	0.842126	0.907825	-0.247892	0.0419979	2.123e-05	0	0	0	2.123e-05	1	0	0	0	0.25	2.521e-05	0	0	0	2.521e-05	1	0	0	0	0.25
DERL2	gi|31455614|ref|NP_057125.2|:derlin-2 [Homo sapiens] ;gi|530410384|ref|XP_005256729.1|:PREDICTED: derlin-2 isoform X1 [Homo sapiens] ;gi|578829936|ref|XP_006721602.1|:PREDICTED: derlin-2 isoform X2 [Homo sapiens] ;	0.84212	0.907821	-0.247902	0.0419996	2.923e-05	0	0	0	2.923e-05	1	0	0	0	0.25	3.471e-05	0	0	0	3.471e-05	1	0	0	0	0.25
AMFR	E3 ubiquitin-protein ligase AMFR [Homo sapiens]	0.842119	0.90782	-0.247904	0.0420001	3.259e-05	0	0	0	3.259e-05	3	0	0	0	0.75	3.87e-05	0	0	0	3.87e-05	3	0	0	0	0.75
RUNX1	gi|169790837|ref|NP_001116079.1|:runt-related transcription factor 1 isoform AML1a [Homo sapiens] ;gi|19923198|ref|NP_001745.2|:runt-related transcription factor 1 isoform AML1c [Homo sapiens] ;gi|49574546|ref|NP_001001890.1|:runt-related transcription factor 1 isoform AML1b [Homo sapiens] ;gi|530419106|ref|XP_005261125.1|:PREDICTED: runt-related transcription factor 1 isoform X2 [Homo sapiens] ;…	0.842074	0.907792	-0.247982	0.0420136	2.794e-05	0	0	0	2.794e-05	1	0	0	0	0.25	3.318e-05	0	0	0	3.318e-05	1	0	0	0	0.25
AGPAT1	gi|530429494|ref|XP_005275561.1|:PREDICTED: 1-acyl-sn-glycerol-3-phosphate acyltransferase alpha isoform X1 [Homo sapiens] ;gi|530429496|ref|XP_005275562.1|:PREDICTED: 1-acyl-sn-glycerol-3-phosphate acyltransferase alpha isoform X2 [Homo sapiens] ;	0.842069	0.907789	-0.24799	0.042015	4.868e-05	0	0	0	4.868e-05	2	0	0	0	0.5	5.781e-05	0	0	0	5.781e-05	2	0	0	0	0.5
INA	alpha-internexin [Homo sapiens]	0.842021	0.658415	-0.248073	0.1815	0.00011211	0.000209	0.0003436	0.00015642	0.000205282	8.00841	15.0231	22	8	13.2579	0.00016679	0.00037353	0.00033577	9.91e-05	0.000243797	10.0334	15	9.04186	1.01562	8.77273
	PREDICTED: AP-3 complex subunit mu-1 isoform X2 [Homo sapiens]	0.841818	0.612921	-0.24842	0.212596	0.00043452	0.00023251	0.00018645	0.00014005	0.000248383	26	14	10	6	14	0.00035721	0.00011891	0.00035465	0.00034945	0.000295055	18	4	8	3	8.25
SYDE2	gi|149274655|ref|NP_115560.1|:rho GTPase-activating protein SYDE2 [Homo sapiens] ;gi|530363440|ref|XP_005271313.1|:PREDICTED: rho GTPase-activating protein SYDE2 isoform X5 [Homo sapiens] ;	0.841727	0.907575	-0.248576	0.0421175	5.85e-06	0	0	0	5.85e-06	1	0	0	0	0.25	6.95e-06	0	0	0	6.95e-06	1	0	0	0	0.25
ARAP1	gi|206597513|ref|NP_056057.2|:arf-GAP with Rho-GAP domain, ANK repeat and PH domain-containing protein 1 isoform a [Homo sapiens] ;gi|206597515|ref|NP_001128662.1|:arf-GAP with Rho-GAP domain, ANK repeat and PH domain-containing protein 1 isoform d [Homo sapiens] ;gi|92091600|ref|NP_001035207.1|:arf-GAP with Rho-GAP domain, ANK repeat and PH domain-containing protein 1 isoform c [Homo sapiens] ;	0.841685	0.907549	-0.248648	0.04213	1.159e-05	0	0	0	1.159e-05	2	0	0	0	0.5	1.377e-05	0	0	0	1.377e-05	2	0	0	0	0.5
GGCX	gi|21361163|ref|NP_000812.2|:vitamin K-dependent gamma-carboxylase isoform 1 [Homo sapiens] ;gi|214010149|ref|NP_001135741.1|:vitamin K-dependent gamma-carboxylase isoform 2 [Homo sapiens] ;gi|530367471|ref|XP_005264316.1|:PREDICTED: vitamin K-dependent gamma-carboxylase isoform X1 [Homo sapiens] ;	0.841672	0.658198	-0.24867	0.181643	1.843e-05	9.16e-06	0	0	1.3795e-05	2	1	0	0	0.75	0	1.639e-05	0	0	1.639e-05	0	1	0	0	0.25
TTC3	gi|49640011|ref|NP_001001894.1|:E3 ubiquitin-protein ligase TTC3 [Homo sapiens] ;gi|530419060|ref|XP_005261102.1|:PREDICTED: E3 ubiquitin-protein ligase TTC3 isoform X1 [Homo sapiens] ;gi|530419062|ref|XP_005261103.1|:PREDICTED: E3 ubiquitin-protein ligase TTC3 isoform X2 [Homo sapiens] ;gi|530419064|ref|XP_005261104.1|:PREDICTED: E3 ubiquitin-protein ligase TTC3 isoform X3 [Homo sapiens] ;gi|530…	0.841463	0.90741	-0.249028	0.0421964	3.45e-06	0	0	0	3.45e-06	1	0	0	0	0.25	4.1e-06	0	0	0	4.1e-06	1	0	0	0	0.25
PSTPIP2	proline-serine-threonine phosphatase-interacting protein 2 [Homo sapiens]	0.841204	0.907248	-0.249472	0.0422741	0	0	4.667e-05	0	4.667e-05	0	0	2	0	0.5	0	0	5.548e-05	0	5.548e-05	0	0	1	0	0.25
EIF2D	eukaryotic translation initiation factor 2D isoform 1 [Homo sapiens]	0.841201	0.69419	-0.249477	0.158522	1.196e-05	0.00013076	0.0001201	6.683e-05	8.24125e-05	1	11	9	4	6.25	0.00012784	0.00014894	3.173e-05	8.337e-05	9.797e-05	9	7	1	1	4.5
PLA2G4A	gi|23943920|ref|NP_077734.1|:cytosolic phospholipase A2 [Homo sapiens] ;gi|530364929|ref|XP_005245324.1|:PREDICTED: cytosolic phospholipase A2 isoform X1 [Homo sapiens] ;gi|530364931|ref|XP_005245325.1|:PREDICTED: cytosolic phospholipase A2 isoform X2 [Homo sapiens] ;	0.840858	0.676462	-0.250066	0.169757	2.798e-05	9.27e-06	0	0	1.8625e-05	3	1	0	0	1	2.215e-05	0	0	0	2.215e-05	2	0	0	0	0.5
KIAA1430	gi|530378016|ref|XP_005263211.1|:PREDICTED: UPF0501 protein KIAA1430 isoform X1 [Homo sapiens] ;gi|578809291|ref|XP_006714343.1|:PREDICTED: UPF0501 protein KIAA1430 isoform X3 [Homo sapiens] ;	0.839641	0.643074	-0.252156	0.191739	1.313e-05	1.305e-05	0	0	1.309e-05	1	1	0	0	0.5	1.559e-05	0	0	0	1.559e-05	1	0	0	0	0.25
DVL1	PREDICTED: segment polarity protein dishevelled homolog DVL-1 isoform X1 [Homo sapiens]	0.839608	0.560386	-0.252212	0.251513	0.00048242	0.00055181	0.00037218	0.00087174	0.000569538	47.9951	55.2446	33.19	62.0951	49.6312	0.00050272	0.00052052	0.00109462	0.00059549	0.000678337	42.1199	29.1132	41.0545	8.5	30.1969
CCRN4L	nocturnin [Homo sapiens]	0.839481	0.643197	-0.252431	0.191656	1.621e-05	1.611e-05	0	0	1.616e-05	1	1	0	0	0.5	1.925e-05	0	0	0	1.925e-05	1	0	0	0	0.25
SCYL2	PREDICTED: SCY1-like protein 2 isoform X2 [Homo sapiens]	0.839475	0.33452	-0.25244	0.475578	9.776e-05	0.00010462	0.00010906	8.402e-05	9.8865e-05	13	14	13	8	12	8.036e-05	0.00013376	9.973e-05	0.00015723	0.00011777	9	10	5	3	6.75
DHX9	ATP-dependent RNA helicase A [Homo sapiens]	0.838878	0.124408	-0.253467	0.905151	0.00151266	0.00115882	0.00108003	0.00112166	0.00121829	275	212	176	146	202.25	0.00137164	0.00129153	0.00145909	0.00168689	0.00145229	210	132	100	44	121.5
CC2D1A	coiled-coil and C2 domain-containing protein 1A [Homo sapiens]	0.8386	0.685884	-0.253946	0.163749	0.00011631	2.555e-05	0.00016663	0.00017612	0.000121153	15.8333	3.5	20.3333	17.1667	14.2083	1.745e-05	0.00019817	0.0001916	0.00017066	0.00014447	2	15.1667	9.83333	3.33333	7.58333
ACADS	short-chain specific acyl-CoA dehydrogenase, mitochondrial precursor [Homo sapiens]	0.838217	0.67769	-0.254604	0.168969	1.696e-05	5.055e-05	0	0	3.3755e-05	1	3	0	0	1	4.027e-05	0	0	0	4.027e-05	2	0	0	0	0.5
SH3BP4	SH3 domain-binding protein 4 [Homo sapiens]	0.837398	0.904861	-0.256014	0.0434181	0	7.21e-06	0	0	7.21e-06	0	1	0	0	0.25	8.61e-06	0	0	0	8.61e-06	1	0	0	0	0.25
BRAP	gi|188497705|ref|NP_006759.3|:BRCA1-associated protein [Homo sapiens] ;gi|530401440|ref|XP_005254001.1|:PREDICTED: BRCA1-associated protein isoform X1 [Homo sapiens] ;	0.837259	0.904774	-0.256254	0.0434601	0	1.173e-05	0	0	1.173e-05	0	1	0	0	0.25	1.401e-05	0	0	0	1.401e-05	1	0	0	0	0.25
GUF1	translation factor GUF1, mitochondrial [Homo sapiens]	0.837097	0.904672	-0.256534	0.0435091	0	1.038e-05	0	0	1.038e-05	0	1	0	0	0.25	1.24e-05	0	0	0	1.24e-05	1	0	0	0	0.25
LMNB2	lamin-B2 [Homo sapiens]	0.83707	0.904655	-0.256579	0.0435171	0	1.12e-05	0	0	1.12e-05	0	1	0	0	0.25	1.338e-05	0	0	0	1.338e-05	1	0	0	0	0.25
CIRH1A	gi|186928847|ref|NP_116219.2|:cirhin [Homo sapiens] ;gi|530424436|ref|XP_005256261.1|:PREDICTED: cirhin isoform X1 [Homo sapiens] ;gi|530424438|ref|XP_005256262.1|:PREDICTED: cirhin isoform X2 [Homo sapiens] ;	0.837055	0.904646	-0.256605	0.0435215	0	2.024e-05	0	0	2.024e-05	0	2	0	0	0.5	2.418e-05	0	0	0	2.418e-05	2	0	0	0	0.5
RPL36AL	60S ribosomal protein L36a-like [Homo sapiens]	0.837047	0.814633	-0.256619	0.0890378	0.00043935	0.00042569	0.0006372	0.00030682	0.000452265	6.66667	6.5	8.66667	3.33333	6.29167	0.00037172	0.00037513	0.00087408	0	0.00054031	4.75	3.2	5	0	3.2375
RPL18A	60S ribosomal protein L18a [Homo sapiens]	0.836859	0.388636	-0.256944	0.410457	0.00115106	0.00067054	0.00066421	0.00066524	0.000787763	29	17	15	12	18.25	0.00075411	0.00091784	0.00126344	0.00082994	0.000941332	16	13	12	3	11
COASY	gi|110227603|ref|NP_079509.5|:bifunctional coenzyme A synthase isoform a precursor [Homo sapiens] ;gi|578831479|ref|XP_006722179.1|:PREDICTED: bifunctional coenzyme A synthase isoform X1 [Homo sapiens] ;	0.836846	0.904514	-0.256966	0.0435848	0	2.462e-05	0	0	2.462e-05	0	2	0	0	0.5	2.942e-05	0	0	0	2.942e-05	2	0	0	0	0.5
MYO19	gi|254939537|ref|NP_001157207.1|:unconventional myosin-XIX isoform 2 [Homo sapiens] ;gi|578831458|ref|XP_006722170.1|:PREDICTED: unconventional myosin-XIX isoform X3 [Homo sapiens] ;gi|578831460|ref|XP_006722171.1|:PREDICTED: unconventional myosin-XIX isoform X4 [Homo sapiens] ;gi|578840416|ref|XP_006725414.1|:PREDICTED: unconventional myosin-XIX isoform X1 [Homo sapiens] ;gi|578840418|ref|XP_006…	0.836842	0.904512	-0.256973	0.0435859	0	1.431e-05	0	0	1.431e-05	0	2	0	0	0.5	1.71e-05	0	0	0	1.71e-05	2	0	0	0	0.5
EIF4EBP2	eukaryotic translation initiation factor 4E-binding protein 2 [Homo sapiens]	0.836829	0.904503	-0.256995	0.0435898	0	5.785e-05	0	0	5.785e-05	0	1	0	0	0.25	6.913e-05	0	0	0	6.913e-05	1	0	0	0	0.25
RPF1	ribosome production factor 1 [Homo sapiens]	0.836769	0.904466	-0.257099	0.0436079	0	1.989e-05	0	0	1.989e-05	0	1	0	0	0.25	2.377e-05	0	0	0	2.377e-05	1	0	0	0	0.25
MTMR9	myotubularin-related protein 9 [Homo sapiens]	0.836753	0.904455	-0.257127	0.0436129	0	3.793e-05	0	0	3.793e-05	0	3	0	0	0.75	4.533e-05	0	0	0	4.533e-05	3	0	0	0	0.75
SLC33A1	gi|300360496|ref|NP_001177921.1|:acetyl-coenzyme A transporter 1 [Homo sapiens] ;gi|578807895|ref|XP_006713885.1|:PREDICTED: acetyl-coenzyme A transporter 1 isoform X1 [Homo sapiens] ;	0.836532	0.904317	-0.257507	0.0436794	0	1.264e-05	0	0	1.264e-05	0	1	0	0	0.25	1.511e-05	0	0	0	1.511e-05	1	0	0	0	0.25
NAA10	N-alpha-acetyltransferase 10 isoform 1 [Homo sapiens]	0.836264	0.541432	-0.25797	0.266456	0.00118906	0.00056127	0.00079592	0.00070582	0.000813018	40	19	24	17	25	0.00091776	0.00121617	0.0013405	0.00041438	0.000972202	26	23	17	2	17
MYL12B	gi|222144326|ref|NP_001138417.1|:myosin regulatory light chain 12B [Homo sapiens] ;gi|530424791|ref|XP_005258134.1|:PREDICTED: myosin regulatory light chain 12A isoform X2 [Homo sapiens] ;gi|530424793|ref|XP_005258135.1|:PREDICTED: myosin regulatory light chain 12A isoform X3 [Homo sapiens] ;	0.83614	0.79051	-0.258183	0.102093	0.00020307	0.00028252	0.00018124	0.00017018	0.000209253	5	7	4	3	4.75	0	0.00014449	0.00032321	0.00028308	0.00025026	0	2	3	1	1.5
PASK	gi|355477262|ref|NP_001239048.1|:PAS domain-containing serine/threonine-protein kinase isoform 1 [Homo sapiens] ;gi|355477264|ref|NP_001239049.1|:PAS domain-containing serine/threonine-protein kinase isoform 2 [Homo sapiens] ;gi|355477267|ref|NP_001239051.1|:PAS domain-containing serine/threonine-protein kinase isoform 3 [Homo sapiens] ;gi|530371547|ref|XP_005247047.1|:PREDICTED: PAS domain-conta…	0.83613	0.863067	-0.2582	0.0639556	0	1.044e-05	2.344e-05	0	1.694e-05	0	2	4	0	1.5	3.118e-05	9.34e-06	0	0	2.026e-05	5	1	0	0	1.5
HERC2	gi|126032348|ref|NP_004658.3|:E3 ubiquitin-protein ligase HERC2 [Homo sapiens] ;gi|530405222|ref|XP_005268334.1|:PREDICTED: E3 ubiquitin-protein ligase HERC2 isoform X3 [Homo sapiens] ;gi|578827505|ref|XP_006720789.1|:PREDICTED: E3 ubiquitin-protein ligase HERC2 isoform X4 [Homo sapiens] ;	0.835851	0.871565	-0.258682	0.0597002	1.734e-05	1.149e-05	6.45e-06	1.009e-05	1.13425e-05	12	8	4	5	7.25	2.917e-05	7.71e-06	3.83e-06	0	1.357e-05	17	3	1	0	5.25
C2CD5	gi|29789060|ref|NP_055617.1|:C2 domain-containing protein 5 isoform e [Homo sapiens] ;gi|530399509|ref|XP_005253595.1|:PREDICTED: C2 domain-containing protein 5 isoform X7 [Homo sapiens] ;gi|530399511|ref|XP_005253596.1|:PREDICTED: C2 domain-containing protein 5 isoform X8 [Homo sapiens] ;gi|555290021|ref|NP_001273106.1|:C2 domain-containing protein 5 isoform d [Homo sapiens] ;gi|555290077|ref|NP…	0.835477	0.47431	-0.259328	0.323938	0	0	1.559e-05	0	1.559e-05	0	0	2	0	0.5	2.489e-05	1.243e-05	0	0	1.866e-05	3	1	0	0	1
NSA2	ribosome biogenesis protein NSA2 homolog isoform 1 [Homo sapiens]	0.834645	0.271251	-0.260766	0.566629	0.00045676	0.0004005	0.00053954	0.00052537	0.000480543	17	15	18	14	16	0.00038285	0.00071689	0.00064144	0.0005618	0.000575745	12	15	9	3	9.75
PLOD1	procollagen-lysine,2-oxoglutarate 5-dioxygenase 1 precursor [Homo sapiens]	0.833775	0.491547	-0.26227	0.308435	0.00026905	0.00024827	0.00024656	0.00021473	0.000244652	28	26	23	16	23.25	0.00015974	0.00023929	0.00030587	0.00046881	0.000293428	14	14	12	7	11.75
ELP6	gi|530372680|ref|XP_005265297.1|:PREDICTED: elongator complex protein 6 isoform X1 [Homo sapiens] ;gi|530372686|ref|XP_005265300.1|:PREDICTED: elongator complex protein 6 isoform X4 [Homo sapiens] ;gi|578806244|ref|XP_006713273.1|:PREDICTED: elongator complex protein 6 isoform X5 [Homo sapiens] ;gi|578806248|ref|XP_006713274.1|:PREDICTED: elongator complex protein 6 isoform X6 [Homo sapiens] ;gi|…	0.83326	0.42762	-0.263162	0.368942	5.312e-05	7.919e-05	5.927e-05	0.00014839	8.49925e-05	2	3	2	4	2.75	6.308e-05	0	0.00014092	0	0.000102	2	0	2	0	1
DSP	desmoplakin isoform I [Homo sapiens]	0.832563	0.0661443	-0.264368	1.17951	0.00027252	0.00035302	0.00030946	0.00023789	0.000293223	112	146	114	70	110.5	0.00033805	0.00037655	0.00035499	0.00033918	0.000352193	117	87	55	20	69.75
DHX36	gi|167830433|ref|NP_065916.2|:probable ATP-dependent RNA helicase DHX36 isoform 1 [Homo sapiens] ;gi|167830436|ref|NP_001107869.1|:probable ATP-dependent RNA helicase DHX36 isoform 2 [Homo sapiens] ;	0.83237	0.821609	-0.264704	0.0853348	1.571e-05	6.887e-05	6.185e-05	4.84e-05	4.87075e-05	2.26667	10	8	5	6.31667	8.133e-05	4.52e-05	4.902e-05	0	5.85167e-05	9.88235	3.66667	2.66667	0	4.05392
PLS3	gi|209862851|ref|NP_001129497.1|:plastin-3 isoform 1 [Homo sapiens] ;gi|288915539|ref|NP_001165806.1|:plastin-3 isoform 2 [Homo sapiens] ;gi|537544624|ref|NP_001269266.1|:plastin-3 isoform 3 [Homo sapiens] ;gi|537544626|ref|NP_001269267.1|:plastin-3 isoform 4 [Homo sapiens] ;	0.831845	0.852198	-0.265613	0.0694596	4.435e-05	5.51e-05	8.659e-05	2.323e-05	5.23175e-05	4	5	7	1.5	4.375	5.079e-05	0.00010848	2.941e-05	0	6.28933e-05	3.85714	5.5	1	0	2.58929
PRMT7	gi|296317343|ref|NP_001171753.1|:protein arginine N-methyltransferase 7 isoform 2 [Homo sapiens] ;gi|578828997|ref|XP_006721260.1|:PREDICTED: protein arginine N-methyltransferase 7 isoform X9 [Homo sapiens] ;	0.830895	0.31916	-0.267262	0.495991	0.00054406	0.00045415	0.0004006	0.00045593	0.000463685	50	42	33	30	38.75	0.00076233	0.00060001	0.00049068	0.0003792	0.000558055	59	31	17	5	28
RABL5	rab-like protein 5 isoform a [Homo sapiens]	0.830871	0.311595	-0.267304	0.50641	0.00041537	0.00037524	0.00042127	0.00031644	0.00038208	11	10	10	6	9.25	0.00053807	0.00053734	0.00050082	0.00026319	0.000459855	12	8	5	1	6.5
TNIK	gi|239735580|ref|NP_001155032.1|:TRAF2 and NCK-interacting protein kinase isoform 2 [Homo sapiens] ;gi|239735582|ref|NP_001155033.1|:TRAF2 and NCK-interacting protein kinase isoform 3 [Homo sapiens] ;gi|239735584|ref|NP_001155034.1|:TRAF2 and NCK-interacting protein kinase isoform 4 [Homo sapiens] ;gi|239735586|ref|NP_001155035.1|:TRAF2 and NCK-interacting protein kinase isoform 5 [Homo sapiens] …	0.830706	0.559792	-0.267591	0.251973	0.00010851	8.729e-05	4.035e-05	2.887e-05	6.6255e-05	21	17	7	4	12.25	5.522e-05	7.353e-05	8.224e-05	0.00010804	7.97575e-05	9	8	6	3	6.5
OSGEP	probable tRNA N6-adenosine threonylcarbamoyltransferase [Homo sapiens]	0.829292	0.762284	-0.270048	0.117883	0	6.217e-05	6.979e-05	2.913e-05	5.36967e-05	0	3	3	1	1.75	0	7.419e-05	5.531e-05	0	6.475e-05	0	2	1	0	0.75
PFKL	gi|48762920|ref|NP_002617.3|:6-phosphofructokinase, liver type [Homo sapiens] ;gi|530419267|ref|XP_005261192.1|:PREDICTED: 6-phosphofructokinase, liver type isoform X2 [Homo sapiens] ;	0.829017	0.206093	-0.270526	0.685936	0.00044512	0.00040869	0.00059142	0.00050199	0.000486805	49.7	45.9199	59.1923	40.1304	48.7357	0.00042772	0.0005898	0.00070708	0.00062423	0.000587208	40.2188	37.0222	29.7632	10	29.251
ZNF267	gi|190194429|ref|NP_003405.3|:zinc finger protein 267 isoform 1 [Homo sapiens] ;gi|388240759|ref|NP_001252517.1|:zinc finger protein 267 isoform 2 [Homo sapiens] ;	0.828514	0.789286	-0.271402	0.102766	0	1.869e-05	1.049e-05	2.626e-05	1.848e-05	0	2	1	2	1.25	1.116e-05	3.345e-05	0	0	2.2305e-05	1	2	0	0	0.75
PPP1CC	gi|350276247|ref|NP_001231903.1|:serine/threonine-protein phosphatase PP1-gamma catalytic subunit isoform 2 [Homo sapiens] ;gi|4506007|ref|NP_002701.1|:serine/threonine-protein phosphatase PP1-gamma catalytic subunit isoform 1 [Homo sapiens] ;gi|578823908|ref|XP_006719532.1|:PREDICTED: serine/threonine-protein phosphatase PP1-gamma catalytic subunit isoform X1 [Homo sapiens] ;	0.82813	0.780719	-0.272072	0.107505	0	0.00097229	0.00052727	0.00070772	0.00073576	0	47.2	22.8	24.4444	23.6111	0	0.00130246	0.00047446	0	0.00088846	0	35.3231	8.62857	0	10.9879
FHL1	gi|228480205|ref|NP_001153171.1|:four and a half LIM domains protein 1 isoform 5 [Homo sapiens] ;gi|228480209|ref|NP_001153173.1|:four and a half LIM domains protein 1 isoform 3 precursor [Homo sapiens] ;gi|578838653|ref|XP_006724810.1|:PREDICTED: four and a half LIM domains protein 1 isoform X5 [Homo sapiens] ;	0.82795	0.5165	-0.272384	0.28693	0.00103842	0.00075049	0.00105316	0.00069221	0.00088357	44	32	40	21	34.25	0.0008127	0.00121742	0.00169028	0.00054831	0.00106718	29	29	27	3.33333	22.0833
TRAPPC9	gi|238624122|ref|NP_113654.4|:trafficking protein particle complex subunit 9 isoform a [Homo sapiens] ;gi|530389349|ref|XP_005251134.1|:PREDICTED: trafficking protein particle complex subunit 9 isoform X1 [Homo sapiens] ;gi|578816197|ref|XP_006716727.1|:PREDICTED: trafficking protein particle complex subunit 9 isoform X2 [Homo sapiens] ;	0.827698	0.336756	-0.272823	0.472685	0	1.114e-05	6.25e-06	1.566e-05	1.10167e-05	0	2	1	2	1.25	1.331e-05	0	0	0	1.331e-05	2	0	0	0	0.5
HEXB	beta-hexosaminidase subunit beta preproprotein [Homo sapiens]	0.827681	0.654083	-0.272853	0.184367	6.282e-05	0.00012486	0.0001682	3.51e-05	9.7745e-05	5	10	12	2	7.25	2.984e-05	0.00013409	0.00013331	0.00017514	0.000118095	2	6	4	2	3.5
ASCC3	activating signal cointegrator 1 complex subunit 3 isoform a [Homo sapiens]	0.825403	0.293773	-0.276829	0.531988	0.00012373	0.00012926	9.556e-05	7.976e-05	0.000107078	39	41	27	18	31.25	0.00016952	0.00012415	9.257e-05	0.00013267	0.000129728	45	22	11	6	21
CORO7	gi|168229161|ref|NP_078811.3|:coronin-7 isoform 1 [Homo sapiens] ;gi|319918855|ref|NP_001188401.1|:coronin-7 isoform 2 [Homo sapiens] ;gi|319918857|ref|NP_001188402.1|:coronin-7 isoform 3 [Homo sapiens] ;gi|319918873|ref|NP_001188408.1|:CORO7-PAM16 protein [Homo sapiens] ;	0.825027	0.775951	-0.277487	0.110166	0	2.251e-05	1.685e-05	1.055e-05	1.66367e-05	0	3	2	1	1.5	2.69e-05	1.343e-05	0	0	2.0165e-05	3	1	0	0	1
DCAF13	DDB1- and CUL4-associated factor 13 [Homo sapiens]	0.823275	0.166995	-0.280554	0.777296	3.51e-05	6.977e-05	6.527e-05	0	5.67133e-05	3	6	5	0	3.5	6.947e-05	6.244e-05	6.208e-05	8.156e-05	6.88875e-05	5	3	2	1	2.75
EIF3C	gi|389616156|ref|NP_001254503.1|:eukaryotic translation initiation factor 3 subunit C isoform a [Homo sapiens] ;gi|530409009|ref|XP_005255592.1|:PREDICTED: eukaryotic translation initiation factor 3 subunit C-like protein isoform X1 [Homo sapiens] ;	0.823201	0.445975	-0.280683	0.350689	0.00050499	0.00037257	0.00032437	0.00033129	0.000383305	66	49	38	31	46	0.00050879	0.00065329	0.00048711	0.00021332	0.000465627	56	48	24	4	33
MAP2K2	dual specificity mitogen-activated protein kinase kinase 2 [Homo sapiens]	0.822703	0.693448	-0.281556	0.158986	0.00016437	0.00019235	0.00019873	8.537e-05	0.000160205	9.41176	11.0833	10.2	3.5	8.54877	0.00040359	8.284e-05	0.00023163	6.086e-05	0.00019473	19.4615	2.66667	5	0.5	6.90705
RANBP1	gi|4506407|ref|NP_002873.1|:ran-specific GTPase-activating protein isoform 2 [Homo sapiens] ;gi|520975484|ref|NP_001265569.1|:ran-specific GTPase-activating protein isoform 3 [Homo sapiens] ;	0.822255	0.47879	-0.282343	0.319855	0.00111216	0.00131242	0.00108565	0.00106792	0.00114454	32	38	28	22	30	0.00066031	0.00148371	0.00221259	0.00121119	0.00139195	16	24	24	5	17.25
VMP1	vacuole membrane protein 1 [Homo sapiens]	0.820843	0.172124	-0.284822	0.764158	0.00012044	8.549e-05	3.839e-05	2.403e-05	6.70875e-05	7	5	2	1	3.75	8.173e-05	0	0	0	8.173e-05	4	0	0	0	1
SNX2	sorting nexin-2 isoform 1 [Homo sapiens]	0.820588	0.566265	-0.28527	0.24698	0.00010768	0.00021244	0.0002264	0.00014476	0.00017282	8	15.8824	15.0769	7.7	11.6648	0.00014385	0.00018049	0.00014282	0.00037526	0.000210605	9	7.53846	4	4	6.13462
	gi|578833363|ref|XP_006722848.1|:PREDICTED: kelch-like protein 26 isoform X1 [Homo sapiens] ;gi|8922854|ref|NP_060786.1|:kelch-like protein 26 [Homo sapiens] ;	0.818068	0.795928	-0.289707	0.0991261	1.157e-05	3.448e-05	1.29e-05	0	1.965e-05	1	3	1	0	1.25	2.747e-05	2.057e-05	0	0	2.402e-05	2	1	0	0	0.75
AIMP2	aminoacyl tRNA synthase complex-interacting multifunctional protein 2 [Homo sapiens]	0.817996	0.216235	-0.289834	0.665075	0.00017464	0.00023863	0.00024354	0.00015245	0.000202315	8	11	10	5	8.5	0.00025922	0.00019416	0.00023163	0.00030431	0.00024733	10	5	4	2	5.25
GLA	alpha-galactosidase A precursor [Homo sapiens]	0.817463	0.137083	-0.290775	0.863017	3.257e-05	9.709e-05	0.000109	4.549e-05	7.10375e-05	2	6	6	2	4	0	8.69e-05	0	0	8.69e-05	0	3	0	0	0.75
AKAP12	gi|530384245|ref|XP_005267290.1|:PREDICTED: A-kinase anchor protein 12 isoform X1 [Homo sapiens] ;gi|530384247|ref|XP_005267291.1|:PREDICTED: A-kinase anchor protein 12 isoform X2 [Homo sapiens] ;gi|530384249|ref|XP_005267292.1|:PREDICTED: A-kinase anchor protein 12 isoform X3 [Homo sapiens] ;	0.817179	0.874881	-0.291277	0.0580511	0.00017249	7.791e-05	5.685e-05	7.118e-05	9.46075e-05	44	20	13	13	22.5	0.00019085	8.368e-05	7.279e-05	0	0.000115773	41	12	7	0	15
LTV1	protein LTV1 homolog [Homo sapiens]	0.817142	0.603195	-0.291341	0.219542	0.00047062	0.00024845	0.00039377	0.00065731	0.000442537	32	17	24	32	26.25	0.0005763	0.00086329	0.00062418	0.0001025	0.000541568	33	33	16	1	20.75
PSMD2	26S proteasome non-ATPase regulatory subunit 2 isoform 1 [Homo sapiens]	0.817035	0.307766	-0.291531	0.51178	0.00090014	0.00058869	0.00048065	0.0004728	0.00061057	117	77	56	44	73.5	0.00091357	0.00061583	0.00081632	0.00064348	0.0007473	100	45	40	12	49.25
EIF4A1	eukaryotic initiation factor 4A-I isoform 1 [Homo sapiens]	0.816194	0.559922	-0.293016	0.251873	0.00507911	0.00390951	0.0031216	0.00260586	0.00367902	295.19	228.646	162.621	108.434	198.723	0.00667975	0.0065682	0.00273774	0.00204444	0.00450753	326.934	214.604	59.9834	17.0476	154.642
GPHN	gi|10880983|ref|NP_065857.1|:gephyrin isoform 1 [Homo sapiens] ;gi|530402924|ref|XP_005267307.1|:PREDICTED: gephyrin isoform X1 [Homo sapiens] ;gi|530402930|ref|XP_005267310.1|:PREDICTED: gephyrin isoform X4 [Homo sapiens] ;gi|530402932|ref|XP_005267311.1|:PREDICTED: gephyrin isoform X5 [Homo sapiens] ;gi|578825413|ref|XP_006720066.1|:PREDICTED: gephyrin isoform X6 [Homo sapiens] ;gi|66932975|ref…	0.816049	0.0780533	-0.293273	1.10761	2.725e-05	4.514e-05	3.04e-05	3.806e-05	3.52125e-05	3	5	3	3	3.5	4.315e-05	0	0	0	4.315e-05	4	0	0	0	1
FAR1	fatty acyl-CoA reductase 1 [Homo sapiens]	0.815933	0.733008	-0.293477	0.134891	8.139e-05	9.436e-05	0.00018159	3.789e-05	9.88075e-05	6	7	12	2	6.75	8.054e-05	4.826e-05	7.196e-05	0.00028363	0.000121097	5	2	2	3	3
SMC1A	structural maintenance of chromosomes protein 1A isoform 1 [Homo sapiens]	0.815083	0.229211	-0.294982	0.639765	0.0001813	0.00023084	0.00016434	0.00015826	0.000183685	32	41	26	20	29.75	0.00022201	0.0001814	0.00030058	0.00019744	0.000225358	33	18	20	5	19
PALLD	PREDICTED: palladin isoform X2 [Homo sapiens]	0.815019	0.25946	-0.295094	0.58593	0.00127794	0.00086838	0.00090726	0.00078309	0.000959168	253	173	161	111	174.5	0.00130309	0.00080864	0.00115229	0.00144344	0.00117687	217.256	90	86	41	108.564
UBE2O	ubiquitin-conjugating enzyme E2 O [Homo sapiens]	0.81374	0.229262	-0.29736	0.639667	0.00014058	0.00012895	0.00012667	9.062e-05	0.000121705	26	24	21	12	20.75	0.00019261	0.0001635	0.00012908	0.00011306	0.000149563	30	17	9	3	14.75
RPL14	60S ribosomal protein L14 [Homo sapiens]	0.813075	0.823131	-0.298539	0.0845313	0.00029243	0.00041975	0.00032624	0.00031767	0.000339022	9	13	9	7	9.5	0.00050157	0.00040457	0.00034475	0	0.000416963	13	7	4	0	6
NKIRAS2	gi|222136630|ref|NP_001138400.1|:NF-kappa-B inhibitor-interacting Ras-like protein 2 isoform b [Homo sapiens] ;gi|530411984|ref|XP_005257308.1|:PREDICTED: NF-kappa-B inhibitor-interacting Ras-like protein 2 isoform X1 [Homo sapiens] ;	0.811333	0.827268	-0.301634	0.0823538	0.00010349	0	5.773e-05	0	8.061e-05	2	0	1	0	0.75	6.145e-05	0	0.00013726	0	9.9355e-05	1	0	1	0	0.5
MAPRE2	gi|10346135|ref|NP_055083.1|:microtubule-associated protein RP/EB family member 2 isoform 1 [Homo sapiens] ;gi|219842325|ref|NP_001137298.1|:microtubule-associated protein RP/EB family member 2 isoform 2 [Homo sapiens] ;gi|219842327|ref|NP_001137299.1|:microtubule-associated protein RP/EB family member 2 isoform 3 [Homo sapiens] ;gi|578832288|ref|XP_006722438.1|:PREDICTED: microtubule-associated …	0.810078	0.171115	-0.303867	0.766713	0.00047146	0.00039371	0.00054816	0.00041773	0.000457765	22.069	18.5455	23	14	19.4036	0.00049285	0.000513	0.00051001	0.00074449	0.000565087	19.4286	13.5	9	5	11.7321
KLC1	gi|110735431|ref|NP_891553.2|:kinesin light chain 1 isoform 2 [Homo sapiens] ;gi|194306559|ref|NP_001123579.1|:kinesin light chain 1 isoform 3 [Homo sapiens] ;gi|33620730|ref|NP_005543.2|:kinesin light chain 1 isoform 1 [Homo sapiens] ;	0.807736	0.648332	-0.308044	0.188203	0.000209	0.00018173	0.00012555	0.00011352	0.00015745	17.1429	15	9.23077	6.66667	12.0101	8.066e-05	0.00039848	0.0002156	8.497e-05	0.000194927	5.57143	18.375	6.66667	1	7.90327
MCM4	gi|33469919|ref|NP_005905.2|:DNA replication licensing factor MCM4 [Homo sapiens] ;gi|530388425|ref|XP_005251291.1|:PREDICTED: DNA replication licensing factor MCM4 isoform X1 [Homo sapiens] ;	0.807357	0.116483	-0.308721	0.933739	0.00083376	0.00086071	0.00083082	0.00075749	0.000820695	103	107	92	67	92.25	0.00100926	0.00096471	0.00079447	0.00129764	0.00101652	105	67	37	23	58
DPYSL5	dihydropyrimidinase-related protein 5 [Homo sapiens]	0.806208	0.616692	-0.310776	0.209931	0.00013625	0.00013539	0.00029018	0.00017299	0.000183703	11	11	21	10	13.25	7.354e-05	0.00017626	0.00022999	0.00043165	0.00022786	5	8	7	5	6.25
SHMT2	gi|19923315|ref|NP_005403.2|:serine hydroxymethyltransferase, mitochondrial isoform 1 precursor [Homo sapiens] ;gi|261862346|ref|NP_001159828.1|:serine hydroxymethyltransferase, mitochondrial isoform 2 precursor [Homo sapiens] ;gi|261862352|ref|NP_001159831.1|:serine hydroxymethyltransferase, mitochondrial isoform 3 [Homo sapiens] ;	0.806009	0.535438	-0.311133	0.271291	2.772e-05	5.51e-05	0.00017009	3.872e-05	7.29075e-05	2	4	11	2	4.75	8.229e-05	9.862e-05	0	0	9.0455e-05	5	4	0	0	2.25
NME4	gi|4826862|ref|NP_005000.1|:nucleoside diphosphate kinase, mitochondrial isoform a precursor [Homo sapiens] ;gi|556695465|ref|NP_001273364.1|:nucleoside diphosphate kinase, mitochondrial isoform c [Homo sapiens] ;	0.806004	0.480685	-0.311141	0.318139	0.00011207	0.00011137	0.00020838	0.00010435	0.000134042	3	3	5	2	3.25	0.00026616	6.645e-05	0	0	0.000166305	6	1	0	0	1.75
DDX17	gi|148613856|ref|NP_001091974.1|:probable ATP-dependent RNA helicase DDX17 isoform 3 [Homo sapiens] ;gi|38201710|ref|NP_006377.2|:probable ATP-dependent RNA helicase DDX17 isoform 1 [Homo sapiens] ;	0.805654	0.457099	-0.311768	0.33999	0.00017953	0.0002592	0.00046101	0.00024134	0.00028527	18.7865	27.2943	43.2414	18.0815	26.8509	0.00020488	0.00036436	0.000342	0.0005051	0.000354085	18.0544	21.4348	13.4912	7.58333	15.1409
FYTTD1	UAP56-interacting factor isoform 1 [Homo sapiens]	0.805252	0.395767	-0.312488	0.40256	0	2.183e-05	7.352e-05	3.068e-05	4.201e-05	0	1	3	1	1.25	5.217e-05	0	0	0	5.217e-05	2	0	0	0	0.5
DDX19A	ATP-dependent RNA helicase DDX19A [Homo sapiens]	0.804827	0.840591	-0.313249	0.0754154	0.00036536	0.00050831	0.00053804	0.00040824	0.000454988	25	35	33	20	28.25	0.00055533	0.00059791	0.00054273	0	0.000565323	32	23	14	0	17.25
TBC1D4	gi|114688046|ref|NP_055647.2|:TBC1 domain family member 4 isoform 1 [Homo sapiens] ;gi|530402814|ref|XP_005266660.1|:PREDICTED: TBC1 domain family member 4 isoform X2 [Homo sapiens] ;gi|557786174|ref|NP_001273588.1|:TBC1 domain family member 4 isoform 3 [Homo sapiens] ;gi|557786188|ref|NP_001273587.1|:TBC1 domain family member 4 isoform 2 [Homo sapiens] ;gi|578825102|ref|XP_006719965.1|:PREDICTED…	0.804735	0.479409	-0.313415	0.319294	4.844e-05	8.557e-05	7.805e-05	3.608e-05	6.2035e-05	9	16	13	4.8	10.7	7.03e-05	0.00011488	8.566e-05	3.751e-05	7.70875e-05	11	12	6	1	7.5
DARS2	aspartate--tRNA ligase, mitochondrial [Homo sapiens]	0.803716	0.366157	-0.315242	0.436333	0.00020578	0.00023678	0.00030207	0.00019665	0.00023532	19	22	25	13	19.75	0.00025721	0.00023118	0.00022984	0.00045293	0.00029279	20	12	8	6	11.5
MRPS11	gi|16554609|ref|NP_073750.2|:28S ribosomal protein S11, mitochondrial isoform a [Homo sapiens] ;gi|530407272|ref|XP_005255034.1|:PREDICTED: 28S ribosomal protein S11, mitochondrial isoform X1 [Homo sapiens] ;gi|530407274|ref|XP_005255035.1|:PREDICTED: 28S ribosomal protein S11, mitochondrial isoform X2 [Homo sapiens] ;	0.803328	0.50308	-0.315938	0.298363	0.00025206	0.00017892	0.00032138	0.00010059	0.000213238	7	5	8	2	5.5	0.00042759	0.00019216	0.00019104	0.00025098	0.000265442	10	3	2	1	4
MYO6	PREDICTED: unconventional myosin-VI isoform X8 [Homo sapiens]	0.803086	0.193381	-0.316374	0.713587	0.00012823	0.00021607	0.00019281	0.00019467	0.000182945	23	39	31	25	29.5	0.00015889	0.00026776	0.00025141	0.00023315	0.000227802	24	27	17	6	18.5
AIMP1	gi|215490009|ref|NP_001135887.1|:aminoacyl tRNA synthase complex-interacting multifunctional protein 1 isoform a precursor [Homo sapiens] ;gi|215490011|ref|NP_001135888.1|:aminoacyl tRNA synthase complex-interacting multifunctional protein 1 isoform b precursor [Homo sapiens] ;	0.803029	0.591278	-0.316475	0.228209	0.00017912	0.00011125	0.00029975	0.00012509	0.000178802	8	5	12	4	7.25	0.00015952	0.00015931	0.00041575	0.00015606	0.00022266	6	4	7	1	4.5
	gi|578830862|ref|XP_006721934.1|:PREDICTED: junction plakoglobin isoform X2 [Homo sapiens] ;gi|578830864|ref|XP_006721935.1|:PREDICTED: junction plakoglobin isoform X3 [Homo sapiens] ;gi|578830876|ref|XP_006721941.1|:PREDICTED: junction plakoglobin isoform X9 [Homo sapiens] ;	0.800101	0.421091	-0.321745	0.375624	5.353e-05	0.00017555	0.00016921	7.477e-05	0.000118265	6	19.8	17	6	12.2	0.00013461	0.0001419	0.00012819	0.00018655	0.000147812	12.7059	8.94118	5.41667	3	7.51593
ASS1	gi|530427176|ref|XP_005272256.1|:PREDICTED: argininosuccinate synthase isoform X1 [Homo sapiens] ;gi|530427178|ref|XP_005272257.1|:PREDICTED: argininosuccinate synthase isoform X2 [Homo sapiens] ;	0.799534	0.363216	-0.322768	0.439835	0.00036187	0.00020326	0.0002984	0.00024173	0.000276315	23	13	17	11	16	0.00052312	0.00027987	0.00025041	0.00032898	0.000345595	28	10	6	3	11.75
NDUFV3	NADH dehydrogenase [ubiquinone] flavoprotein 3, mitochondrial isoform a precursor [Homo sapiens]	0.799253	0.405712	-0.323276	0.391782	2.954e-05	1.468e-05	0	0	2.211e-05	2	1	0	0	0.75	1.754e-05	2.627e-05	3.918e-05	0	2.76633e-05	1	1	1	0	0.75
EIF4G2	eukaryotic translation initiation factor 4 gamma 2 isoform 1 [Homo sapiens]	0.799221	0.149335	-0.323333	0.82584	0.00048523	0.0004975	0.00042103	0.00039802	0.000450445	63	65	49	37	53.5	0.00062856	0.00065761	0.00059248	0.00037577	0.000563605	68.7273	48	29	7	38.1818
VPS51	vacuolar protein sorting-associated protein 51 homolog [Homo sapiens]	0.79911	0.302718	-0.323535	0.518962	0.00047346	0.0003906	0.00022922	0.00026201	0.000338823	53	44	23	21	35.25	0.0005622	0.00033369	0.00042653	0.00037358	0.000424	53	21	18	6	24.5
CYBA	cytochrome b-245 light chain [Homo sapiens]	0.798085	0.920114	-0.325386	0.0361585	0.00017912	3.56e-05	3.997e-05	5.004e-05	7.61825e-05	5	1	1	1	2	0.00012762	6.372e-05	9.503e-05	0	9.54567e-05	3	1	1	0	1.25
HACL1	gi|548923675|ref|NP_001271345.1|:2-hydroxyacyl-CoA lyase 1 isoform d [Homo sapiens] ;gi|548923681|ref|NP_001271344.1|:2-hydroxyacyl-CoA lyase 1 isoform c [Homo sapiens] ;gi|548923731|ref|NP_001271342.1|:2-hydroxyacyl-CoA lyase 1 isoform b [Homo sapiens] ;gi|93004078|ref|NP_036392.2|:2-hydroxyacyl-CoA lyase 1 isoform a [Homo sapiens] ;	0.797485	0.403654	-0.32647	0.393991	1.408e-05	2.799e-05	0	0	2.1035e-05	1	2	0	0	0.75	1.672e-05	2.505e-05	3.736e-05	0	2.63767e-05	1	1	1	0	0.75
CASP7	gi|15718698|ref|NP_203124.1|:caspase-7 isoform delta [Homo sapiens] ;gi|388596698|ref|NP_001253985.1|:caspase-7 isoform alpha precursor [Homo sapiens] ;gi|388596700|ref|NP_001253986.1|:caspase-7 isoform e [Homo sapiens] ;gi|388596702|ref|NP_001253987.1|:caspase-7 isoform f [Homo sapiens] ;gi|578819888|ref|XP_006718079.1|:PREDICTED: caspase-7 isoform X1 [Homo sapiens] ;gi|578819890|ref|XP_00671808…	0.796759	0.587803	-0.327784	0.230768	2.079e-05	0.00012396	0.00020875	2.904e-05	9.5635e-05	1	6	9	1	4.25	0	0.00018491	5.515e-05	0	0.00012003	0	5	1	0	1.5
PRPS1	ribose-phosphate pyrophosphokinase 1 isoform 1 [Homo sapiens]	0.796638	0.874127	-0.328003	0.0584253	0.0009617	0.00081863	0.00087002	0.00042955	0.000769975	43.7778	37.5	35.5	14	32.6944	0.00083473	0.00101597	0.00104889	0	0.00096653	32	26	18	0	19
USP32	ubiquitin carboxyl-terminal hydrolase 32 [Homo sapiens]	0.795797	0.424387	-0.329527	0.372238	8.71e-06	0	0	0	8.71e-06	2	0	0	0	0.5	1.034e-05	0	1.155e-05	0	1.0945e-05	2	0	1	0	0.75
SLC25A20	mitochondrial carnitine/acylcarnitine carrier protein [Homo sapiens]	0.79524	0.679276	-0.330537	0.167954	0	4.613e-05	5.178e-05	0	4.8955e-05	0	2	2	0	1	0	0	6.156e-05	0	6.156e-05	0	0	1	0	0.25
PRKAR2A	gi|530372834|ref|XP_005265370.1|:PREDICTED: cAMP-dependent protein kinase type II-alpha regulatory subunit isoform X1 [Homo sapiens] ;gi|530372836|ref|XP_005265371.1|:PREDICTED: cAMP-dependent protein kinase type II-alpha regulatory subunit isoform X2 [Homo sapiens] ;	0.794905	0.273003	-0.331146	0.563832	0.0010029	0.0008699	0.00081335	0.00081473	0.00087522	58	50.625	42.1628	33.7353	46.1308	0.00156439	0.00107959	0.0006755	0.00108467	0.00110104	76.1905	35.1	14.7273	9	33.7544
CAD	gi|18105007|ref|NP_004332.2|:CAD protein [Homo sapiens] ;gi|530368092|ref|XP_005264612.1|:PREDICTED: CAD protein isoform X1 [Homo sapiens] ;gi|530368094|ref|XP_005264613.1|:PREDICTED: CAD protein isoform X2 [Homo sapiens] ;gi|530368096|ref|XP_005264614.1|:PREDICTED: CAD protein isoform X3 [Homo sapiens] ;gi|530368098|ref|XP_005264615.1|:PREDICTED: CAD protein isoform X4 [Homo sapiens] ;gi|5788031…	0.794459	0.459927	-0.331955	0.337311	0.00012245	0.00018096	0.00014711	0.00014909	0.000149902	39	58	42	34	43.25	0.00010066	0.00012286	0.00022486	0.00030636	0.000188685	27	22	27	14	22.5
RAB3GAP1	rab3 GTPase-activating protein catalytic subunit isoform 2 [Homo sapiens]	0.794142	0.319217	-0.332531	0.495914	0.00065514	0.00065103	0.00057994	0.00075589	0.0006605	92	92	73	76	83.25	0.00055809	0.00059534	0.00098225	0.00119118	0.000831715	66	47	52	24	47.25
DDX3X	gi|301171467|ref|NP_001180345.1|:ATP-dependent RNA helicase DDX3X isoform 2 [Homo sapiens] ;gi|301171475|ref|NP_001180346.1|:ATP-dependent RNA helicase DDX3X isoform 3 [Homo sapiens] ;gi|87196351|ref|NP_001347.3|:ATP-dependent RNA helicase DDX3X isoform 1 [Homo sapiens] ;	0.793502	0.0191951	-0.333694	1.71681	0.00258737	0.00251759	0.00251134	0.00228552	0.00247546	244.82	239.718	213	154.837	213.094	0.00305536	0.00263185	0.00355035	0.00324107	0.00311966	243.466	140	126.645	44	138.528
HSPA14	heat shock 70 kDa protein 14 isoform 1 [Homo sapiens]	0.793384	0.640922	-0.333909	0.193195	0.00023332	8.183e-05	9.187e-05	1.917e-05	0.000106548	17	6	6	1	7.5	0.00016297	0.00014648	3.641e-05	0.00019132	0.000134295	10	6	1	2	4.75
HUWE1	gi|530426348|ref|XP_005262024.1|:PREDICTED: E3 ubiquitin-protein ligase HUWE1 isoform X3 [Homo sapiens] ;gi|530426350|ref|XP_005262025.1|:PREDICTED: E3 ubiquitin-protein ligase HUWE1 isoform X4 [Homo sapiens] ;gi|530426356|ref|XP_005262028.1|:PREDICTED: E3 ubiquitin-protein ligase HUWE1 isoform X7 [Homo sapiens] ;gi|530426358|ref|XP_005262029.1|:PREDICTED: E3 ubiquitin-protein ligase HUWE1 isofor…	0.793162	0.502041	-0.334313	0.299261	7.986e-05	0.00012697	8.552e-05	8.253e-05	9.372e-05	50	80	48	37	53.75	0.00011758	0.00019034	0.00013133	3.339e-05	0.00011816	62	67	31	3	40.75
STXBP3	syntaxin-binding protein 3 [Homo sapiens]	0.793101	0.721614	-0.334424	0.141695	0	0.00011726	6.582e-05	1.648e-05	6.652e-05	0	10	5	1	4	8.407e-05	0.00010495	6.26e-05	0	8.38733e-05	6	5	2	0	3.25
CAPZA2	F-actin-capping protein subunit alpha-2 [Homo sapiens]	0.792241	0.215552	-0.335989	0.666449	0.00100494	0.00055827	0.00055332	0.00062635	0.00068572	41.1429	23	20.3056	18.36	25.7021	0.00091936	0.00067344	0.00101816	0.00085122	0.000865545	31.6977	15.5	15.7143	5	16.978
ABCD3	gi|4506341|ref|NP_002849.1|:ATP-binding cassette sub-family D member 3 isoform a [Homo sapiens] ;gi|530363092|ref|XP_005271145.1|:PREDICTED: ATP-binding cassette sub-family D member 3 isoform X2 [Homo sapiens] ;	0.79089	0.202102	-0.338451	0.69443	0.00038162	0.00023175	0.000272	0.00032572	0.000302772	36	22	23	22	25.75	0.00039021	0.00033941	0.00050614	0.00029554	0.000382825	31	18	18	4	17.75
CNOT1	CCR4-NOT transcription complex subunit 1 isoform c [Homo sapiens]	0.790067	0.821791	-0.339954	0.0852388	0	0.00024594	0.00010518	0.00013374	0.00016162	0	84	32	32.5	37.125	0.0002554	0.00015373	0	0	0.000204565	73	29.3333	0	0	25.5833
NDUFA11	NADH dehydrogenase [ubiquinone] 1 alpha subcomplex subunit 11 isoform 1 [Homo sapiens]	0.789642	0.115351	-0.340729	0.937977	0.00019818	0.00054158	0.00033163	0.00041519	0.000371645	4	11	6	6	6.75	0.00047065	0	0	0	0.00047065	8	0	0	0	2
ZADH2	zinc-binding alcohol dehydrogenase domain-containing protein 2 [Homo sapiens]	0.78964	0.528729	-0.340734	0.276767	0.00029648	0.0001289	0.00010336	7.764e-05	0.000151595	16	7	5	3	7.75	0.00013202	0.00013184	0.00024576	0.0002583	0.00019198	6	4	5	2	4.25
RPL3	60S ribosomal protein L3 isoform a [Homo sapiens]	0.789602	0.218292	-0.340802	0.660961	0.00135208	0.0014642	0.00175821	0.0018158	0.00159757	78	85	90.9176	75	82.2294	0.00117326	0.00215838	0.00234505	0.00241636	0.00202326	57	70	51	20	49.5
	PREDICTED: mitochondrial thiamine pyrophosphate carrier isoform X5 [Homo sapiens]	0.787849	0.923681	-0.34401	0.0344778	2.183e-05	2.169e-05	2.435e-05	6.098e-05	3.22125e-05	1	1	1	2	1.25	2.592e-05	3.883e-05	5.791e-05	0	4.08867e-05	1	1	1	0	0.75
PLEC	gi|41322908|ref|NP_958781.1|:plectin isoform 1e [Homo sapiens] ;gi|41322910|ref|NP_958783.1|:plectin isoform 1d [Homo sapiens] ;gi|41322912|ref|NP_958780.1|:plectin isoform 1f [Homo sapiens] ;gi|41322916|ref|NP_958782.1|:plectin isoform 1 [Homo sapiens] ;gi|47607492|ref|NP_000436.2|:plectin isoform 1c [Homo sapiens] ;gi|530389143|ref|XP_005251033.1|:PREDICTED: plectin isoform X1 [Homo sapiens] ;g…	0.787395	0.158486	-0.34484	0.800008	4.885e-05	6.941e-05	5.008e-05	3.343e-05	5.04425e-05	31.6445	45.2412	29.0747	15.5042	30.3662	5.555e-05	6.553e-05	7.491e-05	6.026e-05	6.40625e-05	30.3009	23.864	18.292	5.6	19.5142
ALDH1B1	aldehyde dehydrogenase X, mitochondrial precursor [Homo sapiens]	0.786162	0.415317	-0.347101	0.381621	0.00024129	0.00010742	0.00019597	9.436e-05	0.00015976	17.8571	8	13	5	10.9643	0.00028443	0.00022433	0.00018638	0.00011772	0.000203215	17.7273	9.33333	5.2	1.25	8.37765
SKP1	gi|25777711|ref|NP_008861.2|:S-phase kinase-associated protein 1 isoform a [Homo sapiens] ;gi|25777713|ref|NP_733779.1|:S-phase kinase-associated protein 1 isoform b [Homo sapiens] ;	0.785941	0.475039	-0.347507	0.323271	0.00026197	0	9.742e-05	0	0.000179695	6	0	2	0	2	0.00041476	0.00015533	0.00011582	0	0.000228637	8	2	1	0	2.75
SKA1	spindle and kinetochore-associated protein 1 [Homo sapiens]	0.785927	0.486763	-0.347533	0.312682	0.0005753	0.00035391	0.000489	0.00042089	0.000459775	21	13	16	11	15.25	0.00052048	0.0009746	0.00065402	0.00019094	0.00058501	16	20	9	1	11.5
DDX39A	ATP-dependent RNA helicase DDX39A [Homo sapiens]	0.785857	0.245105	-0.347662	0.610648	0.00064505	0.00059921	0.00052808	0.00057125	0.000585897	39.4286	36.8571	28.9333	25	32.5548	0.00057417	0.00072752	0.00058586	0.00109466	0.000745552	29.5556	25	13.5	9.6	19.4139
TSR3	ribosome biogenesis protein TSR3 homolog [Homo sapiens]	0.785185	0.871383	-0.348895	0.0597909	0	0	0	6.254e-05	6.254e-05	0	0	0	2	0.5	0	7.965e-05	0	0	7.965e-05	0	2	0	0	0.5
CASC3	PREDICTED: protein CASC3 isoform X1 [Homo sapiens]	0.785068	0.871306	-0.349111	0.0598291	0	0	0	1.388e-05	1.388e-05	0	0	0	1	0.25	0	1.768e-05	0	0	1.768e-05	0	1	0	0	0.25
CCDC47	PREDICTED: coiled-coil domain-containing protein 47 isoform X1 [Homo sapiens]	0.784494	0.932331	-0.350165	0.0304297	5.785e-05	0.00017247	0.00016135	2.02e-05	0.000102967	4	12	10	1	6.75	0.00013739	0.00010291	0.00015346	0	0.000131253	8	4	4	0	4
	gi|578836065|ref|XP_006723886.1|:PREDICTED: ADP-ribosylation factor GTPase-activating protein 1 isoform X1 [Homo sapiens] ;gi|8922652|ref|NP_060679.1|:ADP-ribosylation factor GTPase-activating protein 1 isoform a [Homo sapiens] ;	0.783088	0.0985249	-0.352753	1.00645	0.00031125	0.0004124	0.0004051	0.00057962	0.000427092	18	24	21	24	21.75	0.00059545	0.00055364	0.00055041	0.00048208	0.000545395	29	18	12	4	15.75
PPME1	gi|409971401|ref|NP_001258522.1|:protein phosphatase methylesterase 1 isoform b [Homo sapiens] ;gi|7706645|ref|NP_057231.1|:protein phosphatase methylesterase 1 isoform a [Homo sapiens] ;	0.781751	0.166316	-0.355219	0.779065	0	0	3.897e-05	7.318e-05	5.6075e-05	0	0	2	3	1.25	4.148e-05	3.107e-05	9.265e-05	0.00012172	7.173e-05	2	1	2	1	1.5
CRTC1	gi|148596965|ref|NP_056136.2|:CREB-regulated transcription coactivator 1 isoform 1 [Homo sapiens] ;gi|148596988|ref|NP_001091952.1|:CREB-regulated transcription coactivator 1 isoform 3 [Homo sapiens] ;gi|530414691|ref|XP_005259890.1|:PREDICTED: CREB-regulated transcription coactivator 1 isoform X1 [Homo sapiens] ;gi|530414693|ref|XP_005259891.1|:PREDICTED: CREB-regulated transcription coactivator…	0.781373	0.956099	-0.355917	0.0194974	8.815e-05	2.19e-05	1.229e-05	1.539e-05	3.44325e-05	8	2	1	1	3	2.617e-05	0	2.923e-05	7.68e-05	4.40667e-05	2	0	1	1	1
IARS2	isoleucine--tRNA ligase, mitochondrial precursor [Homo sapiens]	0.780192	0.165617	-0.358098	0.780894	0.00020018	0.00013719	0.00015402	0.00010605	0.00014936	29	20	20	11	20	0.00016394	0.00019646	0.0001648	0.00024056	0.00019144	20	16	9	5	12.5
	PREDICTED: 60S ribosomal protein L34 isoform X2 [Homo sapiens]	0.779687	0.142598	-0.359032	0.845887	0	0	0.00013322	0	0.00013322	0	0	2	0	0.5	0.0001418	0.00021241	0.00015838	0	0.000170863	2	2	1	0	1.25
	PREDICTED: choline/ethanolaminephosphotransferase 1 isoform X2 [Homo sapiens]	0.778292	0.700379	-0.361616	0.154667	5.038e-05	6.675e-05	3.747e-05	0	5.15333e-05	3	4	2	0	2.25	1.994e-05	8.961e-05	8.909e-05	0	6.62133e-05	1	3	2	0	1.5
COPG2	coatomer subunit gamma-2 [Homo sapiens]	0.778188	0.47157	-0.36181	0.326454	0.00017889	0.00013638	0.00015823	0.0002055	0.00016975	22.3043	17.1111	17.6842	18.3448	18.8611	0.00037976	0.00018408	8.51e-05	0.0002236	0.000218135	39.875	12.9032	4	4	15.1946
IKBKG	gi|223671870|ref|NP_001093326.2|:NF-kappa-B essential modulator isoform b [Homo sapiens] ;gi|530422963|ref|XP_005274817.1|:PREDICTED: NF-kappa-B essential modulator isoform X1 [Homo sapiens] ;gi|530422965|ref|XP_005274818.1|:PREDICTED: NF-kappa-B essential modulator isoform X2 [Homo sapiens] ;gi|530422969|ref|XP_005274820.1|:PREDICTED: NF-kappa-B essential modulator isoform X4 [Homo sapiens] ;gi|…	0.777776	0.960396	-0.362573	0.0175498	2.869e-05	0.00011404	0.00017603	6.01e-05	9.4715e-05	2	8	11	3	6	3.407e-05	0.00025516	7.61e-05	0	0.000121777	2	10	2	0	3.5
WNK3	gi|50845418|ref|NP_065973.2|:serine/threonine-protein kinase WNK3 isoform 1 [Homo sapiens] ;gi|578838231|ref|XP_006724657.1|:PREDICTED: serine/threonine-protein kinase WNK3 isoform X2 [Homo sapiens] ;	0.777679	0.952477	-0.362753	0.0211455	7.92e-06	2.82e-05	4.07e-05	1.084e-05	2.1915e-05	2.04082	7.31111	9.4	2	5.18798	9.58e-06	4.322e-05	3.174e-05	0	2.818e-05	2.07843	6.26087	3.08333	0	2.85566
PPP1R12A	protein phosphatase 1 regulatory subunit 12A isoform a [Homo sapiens]	0.777432	0.336652	-0.363212	0.472819	0.00018312	0.00032351	0.00021186	8.525e-05	0.000200935	27	48	28	9	28	0.00029798	0.0003016	0.0001979	0.00023636	0.00025846	37	25	11	5	19.5
GLUD1	glutamate dehydrogenase 1, mitochondrial precursor [Homo sapiens]	0.776813	0.236513	-0.364361	0.626144	0.00037558	0.00043543	0.00053073	0.00038468	0.000431605	30	35	38	22	31.25	0.00041625	0.00042311	0.00059776	0.00078532	0.00055561	28	19	18	9	18.5
DAZAP1	gi|25470886|ref|NP_061832.2|:DAZ-associated protein 1 isoform b [Homo sapiens] ;gi|25470890|ref|NP_733829.1|:DAZ-associated protein 1 isoform a [Homo sapiens] ;gi|530425185|ref|XP_005259587.1|:PREDICTED: DAZ-associated protein 1 isoform X1 [Homo sapiens] ;gi|530425187|ref|XP_005259588.1|:PREDICTED: DAZ-associated protein 1 isoform X2 [Homo sapiens] ;gi|530425189|ref|XP_005259589.1|:PREDICTED: DAZ…	0.776687	0.961517	-0.364596	0.0170429	6.866e-05	8.528e-05	9.574e-05	7.192e-05	8.04e-05	4	5	5	3	4.25	4.076e-05	3.053e-05	0	0.00023926	0.000103517	2	1	0	2	1.25
NDUFA6	NADH dehydrogenase [ubiquinone] 1 alpha subcomplex subunit 6 [Homo sapiens]	0.776209	0.83349	-0.365482	0.0790997	9.072e-05	9.016e-05	0.00010121	0	9.403e-05	2	2	2	0	1.5	0.00016159	8.069e-05	0	0	0.00012114	3	1	0	0	1
AHNAK	gi|530397283|ref|XP_005274299.1|:PREDICTED: neuroblast differentiation-associated protein AHNAK isoform X3 [Homo sapiens] ;gi|530397291|ref|XP_005274303.1|:PREDICTED: neuroblast differentiation-associated protein AHNAK isoform X7 [Homo sapiens] ;	0.775343	0.145964	-0.367094	0.835754	0.00020051	9.886e-05	0	0.00010105	0.000133473	129.333	64.1667	0	46.6667	60.0417	0.00019606	0.00017557	0.00018369	0.00013327	0.000172147	106.5	63.6667	44.6667	12.3333	56.7917
MAP2K3	gi|21618349|ref|NP_659731.1|:dual specificity mitogen-activated protein kinase kinase 3 isoform B [Homo sapiens] ;gi|530410483|ref|XP_005256778.1|:PREDICTED: dual specificity mitogen-activated protein kinase kinase 3 isoform X2 [Homo sapiens] ;gi|530410487|ref|XP_005256780.1|:PREDICTED: dual specificity mitogen-activated protein kinase kinase 3 isoform X4 [Homo sapiens] ;	0.773608	0.413563	-0.370326	0.383459	6.04e-05	0.00014004	6.738e-05	0.00011247	9.50725e-05	3	7	3	4	4.25	4.781e-05	0.00014324	0.00016021	0.00014032	0.000122895	2	4	3	1	2.5
GMDS	GDP-mannose 4,6 dehydratase isoform 1 [Homo sapiens]	0.77356	0.208897	-0.370416	0.680069	0.00037558	0.0003359	0.00035615	0.00023605	0.00032592	20	18	17	9	16	0.00049057	0.00053446	0.0003985	0.00026177	0.000421325	22	16	8	2	12
URB2	gi|197333811|ref|NP_055592.2|:unhealthy ribosome biogenesis protein 2 homolog [Homo sapiens] ;gi|530366678|ref|XP_005273417.1|:PREDICTED: unhealthy ribosome biogenesis protein 2 homolog isoform X1 [Homo sapiens] ;	0.773542	0.698415	-0.370449	0.155886	1.834e-05	0	1.534e-05	0	1.684e-05	4	0	3	0	1.75	2.177e-05	0	0	0	2.177e-05	4	0	0	0	1
FAM107B	gi|40254982|ref|NP_113641.2|:protein FAM107B isoform b [Homo sapiens] ;gi|544186082|ref|NP_001269626.1|:protein FAM107B isoform a [Homo sapiens] ;	0.773477	0.85569	-0.37057	0.0676838	9.132e-05	4.537e-05	5.094e-05	0	6.25433e-05	4	2	2	0	2	0	4.061e-05	0.00012111	0	8.086e-05	0	1	2	0	0.75
DPYSL2	dihydropyrimidinase-related protein 2 isoform 1 [Homo sapiens]	0.772525	0.176102	-0.372347	0.754235	0.00074294	0.0005986	0.00067899	0.00052069	0.000635305	72	58.377	58.9826	36.129	56.3722	0.00098601	0.00104392	0.00061229	0.00064728	0.000822375	80.4715	56.875	22.3696	9	42.179
RPL18	gi|395132436|ref|NP_001257419.1|:60S ribosomal protein L18 isoform 2 [Homo sapiens] ;gi|4506607|ref|NP_000970.1|:60S ribosomal protein L18 isoform 1 [Homo sapiens] ;	0.772211	0.720479	-0.372933	0.142379	0.00013181	0.00026196	0.00024508	0	0.00021295	3	6	5	0	3.5	5.217e-05	0.00046891	0	0.00030622	0.000275767	1	6	0	1	2
PRKAR2B	cAMP-dependent protein kinase type II-beta regulatory subunit [Homo sapiens]	0.771582	0.656044	-0.374108	0.183067	0	5.605e-05	0.00012748	7.62e-05	8.65767e-05	0	3.375	6.83721	3.26471	3.36923	7.56e-05	0.00011594	0.00014508	0	0.000112207	3.80952	3.9	3.27273	0	2.74556
RPL13	60S ribosomal protein L13 isoform 1 [Homo sapiens]	0.77154	0.17561	-0.374188	0.75545	0.0004304	0.00055931	0.00040629	0.0005549	0.000487725	13	17	11	12	13.25	0.00051108	0.00076559	0.0007904	0.00046151	0.000632145	13	13	9	2	9.25
ANKFY1	gi|110815813|ref|NP_057460.3|:ankyrin repeat and FYVE domain-containing protein 1 isoform 1 [Homo sapiens] ;gi|384367970|ref|NP_001244928.1|:ankyrin repeat and FYVE domain-containing protein 1 isoform 3 [Homo sapiens] ;gi|530410398|ref|XP_005256736.1|:PREDICTED: ankyrin repeat and FYVE domain-containing protein 1 isoform X1 [Homo sapiens] ;gi|578829949|ref|XP_006721607.1|:PREDICTED: ankyrin repea…	0.770903	0.705834	-0.375379	0.151297	2.388e-05	0	2.664e-05	5.837e-05	3.62967e-05	4	0	4	7	3.75	1.418e-05	6.372e-05	6.335e-05	0	4.70833e-05	2	6	4	0	3
PDCD2L	programmed cell death protein 2-like [Homo sapiens]	0.770671	0.436729	-0.375812	0.359788	9.757e-05	1.939e-05	4.354e-05	0	5.35e-05	5	1	2	0	2	0	6.942e-05	0	0	6.942e-05	0	2	0	0	0.5
BCR	breakpoint cluster region protein isoform 1 [Homo sapiens]	0.770476	0.14168	-0.376178	0.848692	0.00038474	0.00038192	0.00036156	0.00045292	0.000395285	70	69.9242	58.9655	59	64.4724	0.00038506	0.00046928	0.00069981	0.00049801	0.00051304	59	48	48	13	42
RPL36	60S ribosomal protein L36 [Homo sapiens]	0.770069	0.37227	-0.37694	0.429142	0.00013306	6.611e-05	7.422e-05	0	9.113e-05	2	1	1	0	1	0	0.00011834	0	0	0.00011834	0	1	0	0	0.25
ETF1	eukaryotic peptide chain release factor subunit 1 isoform 1 [Homo sapiens]	0.768812	0.206604	-0.379298	0.684861	0.00054351	0.00036537	0.00041018	0.00037956	0.000424655	34	23	23	17	24.25	0.00055048	0.00045496	0.00042404	0.00077993	0.000552352	29	16	10	7	15.5
ACOT8	gi|34577075|ref|NP_005460.2|:acyl-coenzyme A thioesterase 8 [Homo sapiens] ;gi|530417752|ref|XP_005260297.1|:PREDICTED: acyl-coenzyme A thioesterase 8 isoform X2 [Homo sapiens] ;	0.768079	0.968447	-0.380674	0.0139239	4.38e-05	8.705e-05	9.772e-05	3.059e-05	6.479e-05	2	4	4	1	2.75	0.00015602	3.895e-05	5.809e-05	0	8.43533e-05	6	1	1	0	2
URI1	gi|19924159|ref|NP_003787.2|:unconventional prefoldin RPB5 interactor 1 isoform a [Homo sapiens] ;gi|358001077|ref|NP_001239570.1|:unconventional prefoldin RPB5 interactor 1 isoform c [Homo sapiens] ;gi|530417471|ref|XP_005259419.1|:PREDICTED: unconventional prefoldin RPB5 interactor 1 isoform X1 [Homo sapiens] ;gi|530417473|ref|XP_005259420.1|:PREDICTED: unconventional prefoldin RPB5 interactor …	0.767394	0.97417	-0.38196	0.0113653	7.834e-05	9.083e-05	0.00014567	7.295e-05	9.69475e-05	6	7	10	4	6.75	3.101e-05	0.00027872	6.927e-05	0	0.000126333	2	12	2	0	4
RPL31	gi|148746199|ref|NP_001092047.1|:60S ribosomal protein L31 isoform 2 [Homo sapiens] ;gi|153252132|ref|NP_001093163.1|:60S ribosomal protein L31 isoform 3 [Homo sapiens] ;gi|4506633|ref|NP_000984.1|:60S ribosomal protein L31 isoform 1 [Homo sapiens] ;	0.76609	0.205273	-0.384414	0.687668	0.00180101	0.00195244	0.00194835	0.00160074	0.00182563	33	36	32	21	30.5	0.00136093	0.00223281	0.00289538	0.0030431	0.00238305	21	23	20	8	18
COPS7A	PREDICTED: COP9 signalosome complex subunit 7a isoform X2 [Homo sapiens]	0.765936	0.959349	-0.384704	0.0180233	0.00025403	0.00020195	0.0001417	0.00010644	0.00017603	10	8	5	3	6.5	0.00024131	0.00027111	0	0.00017705	0.000229823	8	6	0	1	3.75
UBAP1	gi|283945558|ref|NP_001164672.1|:ubiquitin-associated protein 1 isoform 2 [Homo sapiens] ;gi|578816520|ref|XP_006716842.1|:PREDICTED: ubiquitin-associated protein 1 isoform X1 [Homo sapiens] ;	0.765537	0.863923	-0.385456	0.063525	0	8.586e-05	0.00012392	1.724e-05	7.56733e-05	0	7	9	1	4.25	8.793e-05	0.00010977	0	0	9.885e-05	6	5	0	0	2.75
RPL9	PREDICTED: 60S ribosomal protein L9 isoform X1 [Homo sapiens]	0.762761	0.162283	-0.390698	0.789726	0.00422055	0.00343485	0.00345021	0.00355721	0.00366571	116	95	85	70	91.5	0.0032403	0.00414203	0.00550123	0.0063398	0.00480584	75	64	57	25	55.25
IRS4	gi|4504733|ref|NP_003595.1|:insulin receptor substrate 4 [Homo sapiens] ;gi|530422231|ref|XP_005262277.1|:PREDICTED: insulin receptor substrate 4 isoform X1 [Homo sapiens] ;gi|578838539|ref|XP_006724776.1|:PREDICTED: insulin receptor substrate 4 isoform X2 [Homo sapiens] ;	0.762129	0.0484606	-0.391893	1.31461	0.00061132	0.00051361	0.0004588	0.00057439	0.00053953	110	93	74	74	87.75	0.00059393	0.00062279	0.00084028	0.0007747	0.000707925	90	63	57	20	57.5
NOP58	nucleolar protein 58 [Homo sapiens]	0.762066	0.138662	-0.392012	0.858043	0.00013206	0.00010498	7.366e-05	0	0.000103567	10	8	5	0	5.75	0.00012545	9.396e-05	0.00014012	0.00018408	0.000135903	8	4	4	2	4.5
POLD1	gi|379030588|ref|NP_001243778.1|:DNA polymerase delta catalytic subunit [Homo sapiens] ;gi|530416733|ref|XP_005259064.1|:PREDICTED: DNA polymerase delta catalytic subunit isoform X2 [Homo sapiens] ;gi|530416735|ref|XP_005259065.1|:PREDICTED: DNA polymerase delta catalytic subunit isoform X3 [Homo sapiens] ;gi|578834563|ref|XP_006723311.1|:PREDICTED: DNA polymerase delta catalytic subunit isoform …	0.761727	0.974359	-0.392654	0.0112808	6.942e-05	5.644e-05	6.336e-05	8.814e-05	6.934e-05	11	9	9	10	9.75	0.00010491	0.0001347	3.348e-05	0	9.103e-05	14	12	2	0	7
C2orf47	uncharacterized protein C2orf47, mitochondrial precursor [Homo sapiens]	0.761224	0.97427	-0.393607	0.0113206	9.602e-05	9.542e-05	5.356e-05	0.00013412	9.478e-05	4	4	2	4	3.5	0.00014253	0	6.368e-05	0.00016732	0.00012451	5	0	1	1	1.75
CHUK	inhibitor of nuclear factor kappa-B kinase subunit alpha [Homo sapiens]	0.761208	0.180464	-0.393637	0.743609	0.00015941	0.00012114	0.00010461	5.239e-05	0.000109387	17	13	10	4	11	0.00014475	0.00015011	0.00014924	0.00013071	0.000143703	13	9	6	2	7.5
SMAP1	gi|113204622|ref|NP_001037770.1|:stromal membrane-associated protein 1 isoform A [Homo sapiens] ;gi|21264558|ref|NP_068759.2|:stromal membrane-associated protein 1 isoform B [Homo sapiens] ;gi|527122088|ref|NP_001268368.1|:stromal membrane-associated protein 1 isoform C [Homo sapiens] ;gi|530383226|ref|XP_005248817.1|:PREDICTED: stromal membrane-associated protein 1 isoform X1 [Homo sapiens] ;gi|…	0.760697	0.971246	-0.394606	0.0126708	0.00019446	0.00014865	0.00015019	0.0002925	0.00019645	13	10	9	14	11.5	0.00023091	0.00026608	0.00027776	0	0.00025825	13	10	7	0	7.5
AVEN	gi|530406230|ref|XP_005254620.1|:PREDICTED: cell death regulator Aven isoform X1 [Homo sapiens] ;gi|9966841|ref|NP_065104.1|:cell death regulator Aven [Homo sapiens] ;	0.760442	0.620692	-0.39509	0.207124	7.458e-05	4.941e-05	8.32e-05	0	6.90633e-05	3	2	3	0	2	0.00011808	8.844e-05	6.594e-05	0	9.082e-05	4	2	1	0	1.75
AGPAT4	gi|530383870|ref|XP_005267109.1|:PREDICTED: 1-acyl-sn-glycerol-3-phosphate acyltransferase delta isoform X1 [Homo sapiens] ;gi|530383874|ref|XP_005267111.1|:PREDICTED: 1-acyl-sn-glycerol-3-phosphate acyltransferase delta isoform X3 [Homo sapiens] ;gi|578812834|ref|XP_006715576.1|:PREDICTED: 1-acyl-sn-glycerol-3-phosphate acyltransferase delta isoform X6 [Homo sapiens] ;gi|578812839|ref|XP_0067155…	0.759898	0.434241	-0.396122	0.362269	9.702e-05	0	0	0	9.702e-05	4	0	0	0	1	0	8.629e-05	0	0.00016906	0.000127675	0	2	0	1	0.75
SRPRB	signal recognition particle receptor subunit beta [Homo sapiens]	0.758586	0.202214	-0.398615	0.694189	0.00028355	0.00066602	0.00057516	0.00054005	0.000516195	11	26	20	15	18	0.00052036	0.00068779	0.0006154	0.00089833	0.00068047	17	15	9	5	11.5
RAF1	gi|530372922|ref|XP_005265412.1|:PREDICTED: RAF proto-oncogene serine/threonine-protein kinase isoform X1 [Homo sapiens] ;gi|530372926|ref|XP_005265414.1|:PREDICTED: RAF proto-oncogene serine/threonine-protein kinase isoform X3 [Homo sapiens] ;gi|530372928|ref|XP_005265415.1|:PREDICTED: RAF proto-oncogene serine/threonine-protein kinase isoform X4 [Homo sapiens] ;gi|530372930|ref|XP_005265416.1|:…	0.75834	0.982851	-0.399084	0.00751239	5.39e-05	0.00014179	0.00015918	0.00012161	0.00011912	5	13.2353	13.2353	8.07692	9.88688	0	0.00025312	0.00014298	7.514e-05	0.00015708	0	13.2	5	1	4.8
RAB5A	ras-related protein Rab-5A [Homo sapiens]	0.757848	0.404485	-0.400019	0.393098	0	7.749e-05	0	0	7.749e-05	0	2.4	0	0	0.6	1.929e-05	2.89e-05	0.00025856	0	0.00010225	0.5	0.5	3	0	1
HNRNPU	heterogeneous nuclear ribonucleoprotein U isoform a [Homo sapiens]	0.756965	0.0251595	-0.401701	1.5993	0.00093143	0.00068158	0.00059513	0.00070959	0.000729432	110	81	63	60	78.5	0.00091498	0.00093384	0.00094337	0.00106232	0.000963628	91	62	42	18	53.25
RPS11	40S ribosomal protein S11 [Homo sapiens]	0.756941	0.295144	-0.401747	0.529966	0.00309495	0.00224078	0.00226897	0.00277887	0.00259589	70	51	46	45	53	0.00267756	0.00188751	0.00422213	0.0049306	0.00342945	51	24	36	16	31.75
	PREDICTED: microtubule-associated protein 4 isoform X41 [Homo sapiens]	0.756923	0.151592	-0.401781	0.819325	0.00060746	0.00046783	0.00041	0.00039876	0.000471012	200	155	121	94	142.5	0.00085116	0.00054567	0.00049952	0.00059274	0.000622273	236	101	62	28	106.75
GNB1L	guanine nucleotide-binding protein subunit beta-like protein 1 [Homo sapiens]	0.756308	0.391998	-0.402953	0.406716	0	2.123e-05	4.767e-05	5.968e-05	4.286e-05	0	1	2	2	1.25	0	0	5.667e-05	0	5.667e-05	0	0	1	0	0.25
MARS	methionine--tRNA ligase, cytoplasmic [Homo sapiens]	0.75621	0.147911	-0.403141	0.83	0.00020181	0.00026225	0.00040699	0.000477	0.000337012	26	34	47	44	37.75	0.00041476	0.00042801	0.00045297	0.0004869	0.00044566	45	31	22	9	26.75
HSPA9	stress-70 protein, mitochondrial precursor [Homo sapiens]	0.755893	0.0395664	-0.403747	1.40267	0.00063787	0.00066455	0.00053946	0.00079032	0.00065805	62	65	47	55	57.25	0.00083074	0.00100653	0.00092789	0.00071708	0.00087056	68	55	34	10	41.75
SLC25A33	gi|14150082|ref|NP_115691.1|:solute carrier family 25 member 33 [Homo sapiens] ;gi|157388989|ref|NP_001098117.1|:solute carrier family 25 member 36 isoform a [Homo sapiens] ;gi|157388991|ref|NP_060625.2|:solute carrier family 25 member 36 isoform b [Homo sapiens] ;gi|530360655|ref|XP_005263560.1|:PREDICTED: solute carrier family 25 member 33 isoform X1 [Homo sapiens] ;	0.755067	0.129051	-0.405324	0.889237	2.176e-05	4.325e-05	4.856e-05	6.079e-05	4.359e-05	1	2	2	2	1.75	0	0	5.773e-05	0	5.773e-05	0	0	1	0	0.25
SNTB2	beta-2-syntrophin [Homo sapiens]	0.755042	0.0656229	-0.405371	1.18294	0	5.142e-05	4.33e-05	0	4.736e-05	0	4	3	0	1.75	4.608e-05	4.602e-05	6.863e-05	9.017e-05	6.2725e-05	3	2	2	1	2
STXBP5	gi|189217897|ref|NP_640337.3|:syntaxin-binding protein 5 isoform a [Homo sapiens] ;gi|189217915|ref|NP_001121187.1|:syntaxin-binding protein 5 isoform b [Homo sapiens] ;gi|578812400|ref|XP_006715402.1|:PREDICTED: syntaxin-binding protein 5 isoform X4 [Homo sapiens] ;	0.75347	0.196747	-0.408378	0.706092	1.253e-05	4.358e-05	2.097e-05	0	2.56933e-05	2	7	3	0	3	3.72e-05	2.229e-05	3.324e-05	4.367e-05	3.41e-05	5	2	2	1	2.5
NOP56	nucleolar protein 56 [Homo sapiens]	0.752294	0.412184	-0.410632	0.384909	0	0	1.312e-05	0	1.312e-05	0	0	1	0	0.25	1.396e-05	2.092e-05	0	0	1.744e-05	1	1	0	0	0.5
YME1L1	gi|21327685|ref|NP_647473.1|:ATP-dependent zinc metalloprotease YME1L1 isoform 1 [Homo sapiens] ;gi|359718987|ref|NP_001240795.1|:ATP-dependent zinc metalloprotease YME1L1 isoform 4 [Homo sapiens] ;gi|7657689|ref|NP_055078.1|:ATP-dependent zinc metalloprotease YME1L1 isoform 3 [Homo sapiens] ;	0.751958	0.412011	-0.411276	0.385091	0	0	1.008e-05	0	1.008e-05	0	0	1	0	0.25	1.073e-05	1.608e-05	0	0	1.3405e-05	1	1	0	0	0.5
AP2M1	gi|14917109|ref|NP_004059.2|:AP-2 complex subunit mu isoform a [Homo sapiens] ;gi|68799814|ref|NP_001020376.1|:AP-2 complex subunit mu isoform b [Homo sapiens] ;	0.751908	0.0417557	-0.411371	1.37928	0.00028906	0.00030321	0.00019707	0.0002243	0.00025341	18	19	11	10	14.5	0.00034325	0.00028566	0.00038339	0.00033579	0.000337023	18	10	9	3	10
ZC3HC1	gi|532524944|ref|NP_001269120.1|:nuclear-interacting partner of ALK isoform 3 [Homo sapiens] ;gi|532524948|ref|NP_001269119.1|:nuclear-interacting partner of ALK isoform 2 [Homo sapiens] ;gi|66348045|ref|NP_057562.3|:nuclear-interacting partner of ALK isoform 1 [Homo sapiens] ;	0.751447	0.310408	-0.412256	0.508067	8.104e-05	0.00014496	0.00010849	6.791e-05	0.0001006	5	9	6	3	5.75	0.00013472	0.00020182	8.599e-05	0.00011297	0.000133875	7	7	2	1	4.25
MFN2	PREDICTED: mitofusin-2 isoform X6 [Homo sapiens]	0.751392	0.264889	-0.412362	0.576937	9.228e-05	8.253e-05	6.177e-05	3.867e-05	6.88125e-05	10	9	6	3	7	6.575e-05	9.849e-05	7.344e-05	0.00012864	9.158e-05	6	6	3	2	4.25
TAB1	TGF-beta-activated kinase 1 and MAP3K7-binding protein 1 isoform alpha [Homo sapiens]	0.751338	0.133331	-0.412466	0.875069	0.0008455	0.00055095	0.00057214	0.00073564	0.000676058	61	40	37	38	44	0.0009546	0.00103551	0.00102947	0.00057964	0.000899805	58	42	28	6	33.5
DDX52	probable ATP-dependent RNA helicase DDX52 [Homo sapiens]	0.75064	0.999079	-0.413807	0.000400001	0.00013995	0.00013907	7.806e-05	6.515e-05	0.000105557	12	12	6	4	8.5	0.00031851	4.149e-05	6.187e-05	0	0.000140623	23	2	2	0	6.75
TCEB2	gi|46276893|ref|NP_996896.1|:transcription elongation factor B polypeptide 2 isoform b [Homo sapiens] ;gi|6005890|ref|NP_009039.1|:transcription elongation factor B polypeptide 2 isoform a [Homo sapiens] ;	0.750498	0.460269	-0.414079	0.336988	0.00039051	0.0009486	0.00111335	0.00090903	0.000840372	9	22	23	15	17.25	0.00046371	0.00084899	0.00195663	0.00120968	0.00111975	9	11	17	4	10.25
DPP3	gi|375331941|ref|NP_001243599.1|:dipeptidyl peptidase 3 isoform 2 [Homo sapiens] ;gi|86792661|ref|NP_569710.2|:dipeptidyl peptidase 3 isoform 1 [Homo sapiens] ;	0.750426	0.725071	-0.414218	0.139619	1.976e-05	0	3.307e-05	0	2.6415e-05	2	0	3	0	1.25	3.52e-05	0	0	0	3.52e-05	3	0	0	0	0.75
[truncated: 1,690 more rows]

## Sheet: Figure 2C labelled proteins
Notes: enrichment ratio of proteins detected only in IC2-BioID was set to 1024 for graphing purposes only.
[truncated: 23 more rows]
