# Supplementary material for: The human cytoplasmic dynein interactome reveals novel activators of motility
Source: eLife. 2017 Jul 18;6:e28257. doi: 10.7554/eLife.28257 (PMC5533585; doi:10.7554/eLife.28257)
Supplement: Supplementary file 3. — The blue tabs contain the BioID interactome data for IC1, IC2, LIC1, LIC2, TcTex, RB, and p62. Only the data for dynein and dynactin subunits and known (BICD2, HOOK1 and HOOK3) and suspected (BICD1) activators are shown. The blue tab titled ‘mapping color code’ lists the dynein and dynactin subunits enriched in the BioID experiments and graphically displayed in Figure 3C. Shading indicates enrichment value: light gray (2–3 fold) or dark gray (≥3 fold), p<0.05 (Student’s two-tailed t-test). The entire datasets can be found in Supplementary file 1 (pink tabs in Supplementary file 1). The pink tabs in this excel file contain all of the significant hits from each BioID tagged dynein and dynactin subunit. Significance was defined as >3 fold enrichment, p-values<0.05 (Students two-tailed t-test), and average spectral counts > 2. This data was used to generate the network shown in Figure 3—figure supplement 1. The pink tab titled ‘core hits’ lists the gene names for all hits, specific hits (unique to each tagged subunit), and hits shared by at least two datasets, for the dynein and dynactin BioID tagged subunits. The pink tab titled ‘core Venn’ contains the output from the Venn analysis (http://bioinformatics.psb.ugent.be/webtools/Venn/) of the dynein and dynactin core subunit interactomes used to generate the network shown in Figure 3—figure supplement 1. Proteins found in only one dataset are listed in the excel file, but not shown in the network. DOI: http://dx.doi.org/10.7554/eLife.28257.019 [file elife-28257-supp3.xlsx]

## Sheet: IC1-mapping
				IC1-BioID										BioID control
				distributed normalized spectral abundance factor (dNSAF)					distributed Spectral Counts					distributed normalized spectral abundance factor (dNSAF)					distributed Spectral Counts
NCBI_Gene	Description	enrichment ratio	p-value	dNSAF 1	dNSAF 2	dNSAF 3	dNSAF 4	avg dNSAF	dSC 1	dSC 2	dSC 3	dSC 4	avg dSCs	dNSAF 1	dNSAF 2	dNSAF 3	dNSAF 4	avg dNSAF	dSC 1	dSC 2	dSC 3	dSC 4	avg dSCs
DYNC1I1	cytoplasmic dynein 1 intermediate chain 1 isoform b [Homo sapiens]	∞	4.07437e-07	0.0417568	0.0425682	0.0486649	0.0401932	0.0432958	657.809	666.168	644.055	584.742	638.193	0	0	0	0	0	0	0	0	0	0
BICD1	protein bicaudal D homolog 1 isoform 1 [Homo sapiens]	∞	0.000175674	0.00043205	0.00038742	0.00025453	0.00047027	0.000386067	10.567	9.41284	5.22989	10.622	8.95794	0	0	0	0	0	0	0	0	0	0
DYNLT3	dynein light chain Tctex-type 3 [Homo sapiens]	∞	0.00134479	0.0017183	0.00138377	0.0012272	0.00260488	0.00173354	5	4	3	7	4.75	0	0	0	0	0	0	0	0	0	0
DCTN4	dynactin subunit 4 isoform b [Homo sapiens]	∞	0.00497881	0.00034665	0.00026171	0.00061894	0.00075072	0.000494505	4	3	6	8	5.25	0	0	0	0	0	0	0	0	0	0
ACTR10	actin-related protein 10 [Homo sapiens]	∞	0.0164594	0.00038239	0.00019247	0.00011379	0.00051759	0.00030156	4	2	1	5	3	0	0	0	0	0	0	0	0	0	0
ACTR1B	beta-centractin [Homo sapiens]	∞	0.355918	0	0	0	0.00031065	0.00031065	0	0	0	2.70588	0.676471	0	0	0	0	0	0	0	0	0	0
DCTN3	1 genes:DCTN3.gi|526479822|ref|NP_001268354.1|:DCTN3:dynactin subunit 3 isoform 3 [Homo sapiens] ;gi|6005745|ref|NP_009165.1|:DCTN3:dynactin subunit 3 isoform 1 [Homo sapiens] ;	∞	0.355918	0	0	0	0.00054641	0.00054641	0	0	0	2	0.5	0	0	0	0	0	0	0	0	0	0
DYNC1LI1	cytoplasmic dynein 1 light intermediate chain 1 [Homo sapiens]	63.0491	0.000433874	0.00826631	0.00860241	0.0146983	0.0103317	0.0104747	108.449	112.114	162	125.177	126.935	8.44e-05	0.00026241	0.00017386	0.00014387	0.000166135	2.11111	4	3	2	2.77778
DYNC1I2	PREDICTED: cytoplasmic dynein 1 intermediate chain 2 isoform X5 [Homo sapiens]	44.3085	0.000119624	0.00165207	0.00265612	0.0023985	0.00179345	0.00212503	26.1915	41.8316	31.9451	26.2579	31.5565	0	0	4.796e-05	0	4.796e-05	0	0	1	0	0.25
DYNLRB1	dynein light chain roadblock-type 1 isoform a [Homo sapiens]	35.5349	0.000203929	0.034051	0.0238267	0.0197716	0.0229323	0.0251454	82	57	40	51	57.5	0	0	0.00063145	0.0007838	0.000707625	0	0	2	2	1
DYNC1H1	cytoplasmic dynein 1 heavy chain 1 [Homo sapiens]	28.9291	1.87532e-08	0.0118667	0.0107794	0.011337	0.0119856	0.0114922	1383	1248	1110	1290	1257.75	0.00020252	0.00045048	0.00045014	0.00048587	0.000397253	45	61	69	60	58.75
DYNC1LI2	cytoplasmic dynein 1 light intermediate chain 2 isoform 1 [Homo sapiens]	18.039	1.09442e-05	0.00701283	0.00863641	0.00983757	0.00919686	0.00867092	86.5508	105.886	102	104.823	99.8149	0.00071775	0.00041841	0	0.00030587	0.000480677	16.8889	6	0	4	6.72222
DCTN1	1 genes:DCTN1.gi|13259510|ref|NP_004073.2|:DCTN1:dynactin subunit 1 isoform 1 [Homo sapiens] ;gi|205277392|ref|NP_001128512.1|:DCTN1:dynactin subunit 1 isoform 3 [Homo sapiens] ;gi|299890871|ref|NP_001177765.1|:DCTN1:dynactin subunit 1 isoform 5 [Homo sapiens] ;gi|299890875|ref|NP_001177766.1|:DCTN1:dynactin subunit 1 isoform 6 [Homo sapiens] ;	9.08679	9.44416e-06	0.0013101	0.001727	0.00144806	0.00141862	0.00147594	42	55	39	42	44.5	6.544e-05	0.00024162	0.00016602	0.00017663	0.000162427	4	9	7	6	6.5
DCTN2	dynactin subunit 2 isoform 3 [Homo sapiens]	8.16358	2.12202e-06	0.00198826	0.00180131	0.00165667	0.00172236	0.00179215	20	18	14	16	17	0.00026071	0.00017112	0.00022676	0	0.00021953	5	2	3	0	2.5
DYNLT1	dynein light chain Tctex-type 1 [Homo sapiens]	7.24087	0.00904596	0.00670289	0.00177563	0.00377935	0.00382005	0.00401948	19	5	9	10	10.75	0.00055511	0	0	0	0.00055511	3	0	0	0	0.75
BICD2	protein bicaudal D homolog 2 isoform 1 [Homo sapiens]	6.95635	4.26204e-07	0.00906548	0.0102593	0.0098106	0.0106719	0.00995183	194.433	218.587	176.77	211.378	200.292	0.00180967	0.0014045	0.0012762	0.00123207	0.00143061	74	35	36	28	43.25
ACTR1A	alpha-centractin [Homo sapiens]	5.16704	0.00635796	0.00148432	0.00096054	0.00252403	0.00232986	0.00182469	14	9	20	20.2941	15.8235	0	0.00045625	0.00040305	0.00020012	0.00035314	0	5	5	2	3
DYNLL1	dynein light chain 1, cytoplasmic [Homo sapiens]	4.24202	0.0954005	0	0.00828511	0.00836661	0.00634254	0.00766475	0	18.375	15.6923	13.0769	11.7861	0.00164453	0.00222736	0.00229877	0.0010568	0.00180686	7	5.77778	6.75	2.5	5.50694
HOOK1	PREDICTED: protein Hook homolog 1 isoform X1 [Homo sapiens]	2.49655	0.0026569	0.00098566	0.00110245	0.00143398	0.00088942	0.00110288	18	20	22	15	18.75	0.00045954	0.00061268	0.00033307	0.00036175	0.00044176	16	13	8	7	11
HOOK3	protein Hook homolog 3 [Homo sapiens]	2.19058	0.228427	0.00027761	0.00016767	0	6.012e-05	0.000168467	5	3	0	1	2.25	5.824e-05	9.557e-05	0	0	7.6905e-05	2	2	0	0	1
CAPZA1	F-actin-capping protein subunit alpha-1 [Homo sapiens]	1.84136	0.124731	0.00083632	0.00042094	0.00116141	0.00113199	0.000887665	6	3	7	7.5	5.875	0.001062	0	0.00012112	0.00026309	0.00048207	14.5263	0	1.14286	2	4.41729
CAPZB	1 genes:CAPZB.gi|4826659|ref|NP_004921.1|:CAPZB:F-actin-capping protein subunit beta isoform 1 [Homo sapiens] ;gi|531990816|ref|NP_001269091.1|:CAPZB:F-actin-capping protein subunit beta isoform 4 [Homo sapiens] ;	0.993178	0.654503	0.00117249	0.00029507	0.00034891	0.0006348	0.000612818	8	2	2	4	4	0.00115307	0.00025228	0.00044573	0	0.000617027	15	2	4	0	5.25
DYNLL2	dynein light chain 2, cytoplasmic [Homo sapiens]	0.777713	0.542972	0.00089583	0.00118359	0.00069722	0.00190276	0.00116985	2	2.625	1.30769	3.92308	2.46394	0.0014096	0.00278421	0.00076626	0.0010568	0.00150422	6	7.22222	2.25	2.5	4.49306
CAPZA2	F-actin-capping protein subunit alpha-2 [Homo sapiens]	0.675433	0.0798791	0.00083632	0.00042094	0	0.00037733	0.000544863	6	3	0	2.5	2.875	0.0006195	0.00095972	0.00072671	0.00092082	0.000806688	8.47368	8	6.85714	7	7.58271

## Sheet: IC2-mapping
				IC2-BioID										BioID control
				distributed normalized spectral abundance factor (dNSAF)					distributed Spectral Counts					distributed normalized spectral abundance factor (dNSAF)					distributed Spectral Counts
NCBI_Gene	Description	enrichment ratio	p-value	dNSAF 1	dNSAF 2	dNSAF 3	dNSAF 4	avg dNSAF	dSC 1	dSC 2	dSC 3	dSC 4	avg dSCs	dNSAF 1	dNSAF 2	dNSAF 3	dNSAF 4	avg dNSAF	dSC 1	dSC 2	dSC 3	dSC 4	avg dSCs
ACTR10	actin-related protein 10 [Homo sapiens]	∞	1.81581e-05	0.00068234	0.00053877	0.00073506	0.0008051	0.000690318	11	4	8	6	7.25	0	0	0	0	#DIV/0!	0	0	0	0	0
DYNLT3	dynein light chain Tctex-type 3 [Homo sapiens]	∞	0.000326747	0.0144944	0.00774718	0.0115606	0.0149533	0.0121889	65	16	35	31	36.75	0	0	0	0	#DIV/0!	0	0	0	0	0
DCTN4	dynactin subunit 4 isoform b [Homo sapiens]	∞	0.00415002	0.00056232	0.00146523	0.00074964	0.00145968	0.00105922	10	12	9	12	10.75	0	0	0	0	#DIV/0!	0	0	0	0	0
BICD1	protein bicaudal D homolog 1 isoform 1 [Homo sapiens]	∞	0.0569739	0.00011563	0	4.074e-05	0.00012104	9.247e-05	4.35849	0	1.03659	2.10909	1.87604	0	0	0	0	#DIV/0!	0	0	0	0	0
DCTN3	1 genes:DCTN3.gi|526479822|ref|NP_001268354.1|:DCTN3:dynactin subunit 3 isoform 3 [Homo sapiens] ;gi|6005745|ref|NP_009165.1|:DCTN3:dynactin subunit 3 isoform 1 [Homo sapiens] ;	∞	0.148287	0.00163714	0	0	0.00106242	0.00134978	10	0	0	3	3.25	0	0	0	0	#DIV/0!	0	0	0	0	0
ACTR1B	beta-centractin [Homo sapiens]	∞	0.355918	0.00023766	0	0	0	0.00023766	3.45455	0	0	0	0.863636	0	0	0	0	#DIV/0!	0	0	0	0	0
BICD2	protein bicaudal D homolog 2 isoform 1 [Homo sapiens]	5.20146	3.56133e-07	0.00685674	0.0078831	0.00757175	0.00745344	0.00744126	226.642	120	168.963	113.891	157.374	0.00180967	0.0014045	0.0012762	0.00123207	0.00143061	74	35	36	28	43.25
DCTN1	1 genes:DCTN1.gi|13259510|ref|NP_004073.2|:DCTN1:dynactin subunit 1 isoform 1 [Homo sapiens] ;gi|205277392|ref|NP_001128512.1|:DCTN1:dynactin subunit 1 isoform 3 [Homo sapiens] ;gi|299890871|ref|NP_001177765.1|:DCTN1:dynactin subunit 1 isoform 5 [Homo sapiens] ;gi|299890875|ref|NP_001177766.1|:DCTN1:dynactin subunit 1 isoform 6 [Homo sapiens] ;	6.46744	3.49434e-05	0.00125489	0.00096688	0.0009294	0.00105079	0.00105049	62	22	31	24	34.75	6.544e-05	0.00024162	0.00016602	0.00017663	0.000162427	4	9	7	6	6.5
DYNC1LI1	cytoplasmic dynein 1 light intermediate chain 1 [Homo sapiens]	65.0039	5.78315e-05	0.00853292	0.0136052	0.0109712	0.0100885	0.0107994	172.526	126.685	149.756	94.2959	135.816	8.44e-05	0.00026241	0.00017386	0.00014387	0.000166135	2.11111	4	3	2	2.77778
DYNC1H1	cytoplasmic dynein 1 heavy chain 1 [Homo sapiens]	37.3813	9.36814e-05	0.0108679	0.0183395	0.0142341	0.0159577	0.0148498	1952	1517	1726	1325	1630	0.00020252	0.00045048	0.00045014	0.00048587	0.000397253	45	61	69	60	58.75
DYNC1LI2	cytoplasmic dynein 1 light intermediate chain 2 isoform 1 [Homo sapiens]	19.6754	0.000111574	0.00659677	0.00951132	0.0106102	0.0111117	0.0094575	125.474	83.3152	136.244	97.7041	110.684	0.00071775	0.00041841	0	0.00030587	0.000480677	16.8889	6	0	4	6.72222
DYNC1I2	PREDICTED: cytoplasmic dynein 1 intermediate chain 2 isoform X5 [Homo sapiens]	1157.8	0.000191162	0.0409286	0.0740303	0.0545626	0.05259	0.0555279	1000	833	900	594	831.75	0	0	4.796e-05	0	4.796e-05	0	0	1	0	0.25
DYNLT1	dynein light chain Tctex-type 1 [Homo sapiens]	31.9953	0.000415378	0.0224332	0.0109352	0.0203443	0.017331	0.0177609	98	22	60	35	53.75	0.00055511	0	0	0	0.00055511	3	0	0	0	0.75
ACTR1A	alpha-centractin [Homo sapiens]	4.76674	0.000881836	0.00106945	0.00194195	0.00193613	0.00178578	0.00168333	15.5455	13	19	12	14.8864	0	0.00045625	0.00040305	0.00020012	0.00035314	0	5	5	2	3
DCTN2	dynactin subunit 2 isoform 3 [Homo sapiens]	11.2456	0.00273063	0.00251573	0.00168081	0.00191098	0.0037675	0.00246875	39	12	20	27	24.5	0.00026071	0.00017112	0.00022676	0	0.00021953	5	2	3	0	2.5
DYNLL1	dynein light chain 1, cytoplasmic [Homo sapiens]	6.21528	0.00299909	0.00860667	0.0073436	0.0154982	0.0134722	0.0112302	29.6129	11.6364	36	21.4286	24.6695	0.00164453	0.00222736	0.00229877	0.0010568	0.00180686	7	5.77778	6.75	2.5	5.50694
DYNLL2	dynein light chain 2, cytoplasmic [Homo sapiens]	5.7085	0.144044	0.0210385	0.00275385	0.00516608	0.00538886	0.00858683	72.3871	4.36364	12	8.57143	24.3305	0.0014096	0.00278421	0.00076626	0.0010568	0.00150422	6	7.22222	2.25	2.5	4.49306
DYNLRB1	dynein light chain roadblock-type 1 isoform a [Homo sapiens]	4.93089	0.238357	0.00754451	0.00234029	0	0.00058286	0.00348922	28	4	0	1	8.25	0	0	0.00063145	0.0007838	0.000707625	0	0	2	2	1
HOOK3	protein Hook homolog 3 [Homo sapiens]	2.95478	0.015446	0.00025218	7.823e-05	0.00026682	0.00031172	0.000227237	7	1	5	4	4.25	5.824e-05	9.557e-05	0	0	7.6905e-05	2	2	0	0	1
HOOK1	PREDICTED: protein Hook homolog 1 isoform X1 [Homo sapiens]	2.56219	0.0323141	0.00177657	0.00084868	0.0012105	0.00069174	0.00113187	50	11	23	9	23.25	0.00045954	0.00061268	0.00033307	0.00036175	0.00044176	16	13	8	7	11
CAPZA1	F-actin-capping protein subunit alpha-1 [Homo sapiens]	1.88224	0.400337	0.00119386	0.00058916	0	0.00093909	0.00090737	13.2	3	0	4.8	5.25	0.001062	0	0.00012112	0.00026309	0.00048207	14.5263	0	1.14286	2	4.41729
CAPZB	1 genes:CAPZB.gi|4826659|ref|NP_004921.1|:CAPZB:F-actin-capping protein subunit beta isoform 1 [Homo sapiens] ;gi|531990816|ref|NP_001269091.1|:CAPZB:F-actin-capping protein subunit beta isoform 4 [Homo sapiens] ;	1.33166	0.66878	0.00114119	0.00061949	0.00070432	0	0.000821667	12	3	5	0	5	0.00115307	0.00025228	0.00044573	0	0.000617027	15	2	4	0	5.25
CAPZA2	F-actin-capping protein subunit alpha-2 [Homo sapiens]	1.32249	0.310376	0.0007959	0.00058916	0.00147366	0.00140864	0.00106684	8.8	3	11	7.2	7.5	0.0006195	0.00095972	0.00072671	0.00092082	0.000806688	8.47368	8	6.85714	7	7.58271

## Sheet: LIC1-mapping
				LIC1-BioID										BioID control
				distributed normalized spectral abundance factor (dNSAF)					distributed Spectral Counts					distributed normalized spectral abundance factor (dNSAF)					distributed Spectral Counts
NCBI_Gene	Description	enrichment ratio	p-value	dNSAF 1	dNSAF 2	dNSAF 3	dNSAF 4	avg dNSAF	dSC 1	dSC 2	dSC 3	dSC 4	avg dSCs	dNSAF 1	dNSAF 2	dNSAF 3	dNSAF 4	avg dNSAF	dSC 1	dSC 2	dSC 3	dSC 4	avg dSCs
DYNLT3	dynein light chain Tctex-type 3 [Homo sapiens]	∞	0.0325713	0.00065659	0	0.00041439	0.00045186	0.000507613	2	0	1	1	1	0	0	0	0	#DIV/0!	0	0	0	0	0
BICD1	protein bicaudal D homolog 1 isoform 1 [Homo sapiens]	∞	0.044706	8.313e-05	0.00027913	9.86e-05	5.445e-05	0.000128828	2.12844	5	2	1.01282	2.53532	0	0	0	0	#DIV/0!	0	0	0	0	0
DCTN4	dynactin subunit 4 isoform b [Homo sapiens]	∞	0.134574	0	0	0.000209	0.00022789	0.000218445	0	0	2	2	1	0	0	0	0	#DIV/0!	0	0	0	0	0
ACTR10	actin-related protein 10 [Homo sapiens]	∞	0.134574	0	0	0.00023055	0.00025139	0.00024097	0	0	2	2	1	0	0	0	0	#DIV/0!	0	0	0	0	0
ACTR1B	beta-centractin [Homo sapiens]	∞	0.355918	0	0	0	6.97e-05	6.97e-05	0	0	0	0.5	0.125	0	0	0	0	#DIV/0!	0	0	0	0	0
DCTN3	1 genes:DCTN3.gi|526479822|ref|NP_001268354.1|:DCTN3:dynactin subunit 3 isoform 3 [Homo sapiens] ;gi|6005745|ref|NP_009165.1|:DCTN3:dynactin subunit 3 isoform 1 [Homo sapiens] ;	∞	0.355918	0.00048205	0	0	0	0.00048205	2	0	0	0	0.5	0	0	0	0	#DIV/0!	0	0	0	0	0
DYNC1LI1	cytoplasmic dynein 1 light intermediate chain 1 [Homo sapiens]	768.281	7.71112e-06	0.103458	0.139051	0.14336	0.124685	0.127638	1420.84	1336.07	1559.77	1244.1	1390.2	8.44e-05	0.00026241	0.00017386	0.00014387	0.000166135	2.11111	4	3	2	2.77778
DYNC1H1	cytoplasmic dynein 1 heavy chain 1 [Homo sapiens]	37.9041	1.09684e-07	0.0160001	0.0140002	0.0144125	0.0158172	0.0150575	1952	1195	1393	1402	1485.5	0.00020252	0.00045048	0.00045014	0.00048587	0.000397253	45	61	69	60	58.75
DYNC1I2	PREDICTED: cytoplasmic dynein 1 intermediate chain 2 isoform X5 [Homo sapiens]	36.9791	2.54548e-08	0.0018077	0.00163637	0.00182541	0.00182459	0.00177352	30	19	24	22	23.75	0	0	4.796e-05	0	4.796e-05	0	0	1	0	0.25
HOOK3	protein Hook homolog 3 [Homo sapiens]	7.59993	0.000870822	0.00053039	0.0008339	0.00053559	0.00043801	0.000584473	10	11	8	6	8.75	5.824e-05	9.557e-05	0	0	7.6905e-05	2	2	0	0	1
BICD2	protein bicaudal D homolog 2 isoform 1 [Homo sapiens]	6.19332	3.49218e-05	0.0102386	0.00725746	0.00832075	0.00962407	0.00886022	229.872	114	148	156.987	162.215	0.00180967	0.0014045	0.0012762	0.00123207	0.00143061	74	35	36	28	43.25
DCTN1	1 genes:DCTN1.gi|13259510|ref|NP_004073.2|:DCTN1:dynactin subunit 1 isoform 1 [Homo sapiens] ;gi|205277392|ref|NP_001128512.1|:DCTN1:dynactin subunit 1 isoform 3 [Homo sapiens] ;gi|299890871|ref|NP_001177765.1|:DCTN1:dynactin subunit 1 isoform 5 [Homo sapiens] ;gi|299890875|ref|NP_001177766.1|:DCTN1:dynactin subunit 1 isoform 6 [Homo sapiens] ;	2.82052	0.028428	0.00074496	0.00038332	0.00037613	0.00032811	0.00045813	25	9	10	8	13	6.544e-05	0.00024162	0.00016602	0.00017663	0.000162427	4	9	7	6	6.5
DCTN2	dynactin subunit 2 isoform 3 [Homo sapiens]	2.56944	0.0937832	9.497e-05	0.00040721	0.00083911	0.00091499	0.00056407	1	3	7	7	4.5	0.00026071	0.00017112	0.00022676	0	0.00021953	5	2	3	0	2.5
HOOK1	PREDICTED: protein Hook homolog 1 isoform X1 [Homo sapiens]	1.97821	0.0116442	0.00104621	0.00067291	0.00105647	0.00071999	0.000873895	20	9	16	10	13.75	0.00045954	0.00061268	0.00033307	0.00036175	0.00044176	16	13	8	7	11
DYNC1LI2	cytoplasmic dynein 1 light intermediate chain 2 isoform 1 [Homo sapiens]	1.68344	0.138102	0.0005545	0.00087722	0.00138998	0.00041506	0.00080919	7.16388	7.9292	14.2268	3.89594	8.30395	0.00071775	0.00041841	0	0.00030587	0.000480677	16.8889	6	0	4	6.72222
CAPZA2	F-actin-capping protein subunit alpha-2 [Homo sapiens]	1.35965	0.0124087	0.00106524	0.00114191	0.00108048	0.00109963	0.00109682	8	6	6.42857	6	6.60714	0.0006195	0.00095972	0.00072671	0.00092082	0.000806688	8.47368	8	6.85714	7	7.58271
DYNLRB1	dynein light chain roadblock-type 1 isoform a [Homo sapiens]	1.18706	0.852275	0	0.00113398	0	0.000546	0.00083999	0	2	0	1	0.75	0	0	0.00063145	0.0007838	0.000707625	0	0	2	2	1
CAPZB	1 genes:CAPZB.gi|4826659|ref|NP_004921.1|:CAPZB:F-actin-capping protein subunit beta isoform 1 [Homo sapiens] ;gi|531990816|ref|NP_001269091.1|:CAPZB:F-actin-capping protein subunit beta isoform 4 [Homo sapiens] ;	1.05375	0.67381	0.00070004	0.00060034	0	0	0.00065019	5	3	0	0	2	0.00115307	0.00025228	0.00044573	0	0.000617027	15	2	4	0	5.25
CAPZA1	F-actin-capping protein subunit alpha-1 [Homo sapiens]	0.887833	0.793296	0.00053262	0.00038064	0.00043219	0.00036654	0.000427998	4	2	2.57143	2	2.64286	0.001062	0	0.00012112	0.00026309	0.00048207	14.5263	0	1.14286	2	4.41729
DYNLT1	dynein light chain Tctex-type 1 [Homo sapiens]	0.851669	0.63396	0	0.00048169	0	0.00046385	0.00047277	0	1	0	1	0.5	0.00055511	0	0	0	0.00055511	3	0	0	0	0.75
DYNLL1	dynein light chain 1, cytoplasmic [Homo sapiens]	0.770886	0.508336	0.00275072	0.00061158	0.00162031	0.00058894	0.00139289	6.42857	1	3	1	2.85714	0.00164453	0.00222736	0.00229877	0.0010568	0.00180686	7	5.77778	6.75	2.5	5.50694
ACTR1A	alpha-centractin [Homo sapiens]	0.691341	0.888179	0.00050641	0.00014476	0.00025569	6.97e-05	0.00024414	5	1	2	0.5	2.125	0	0.00045625	0.00040305	0.00020012	0.00035314	0	5	5	2	3
DYNLL2	dynein light chain 2, cytoplasmic [Homo sapiens]	0.569023	0.0838965	0.00110029	0.00061158	0	0	0.000855935	2.57143	1	0	0	0.892857	0.0014096	0.00278421	0.00076626	0.0010568	0.00150422	6	7.22222	2.25	2.5	4.49306

## Sheet: LIC2-mapping
				LIC2-BioID										BioID control
				distributed normalized spectral abundance factor (dNSAF)					distributed Spectral Counts					distributed normalized spectral abundance factor (dNSAF)					distributed Spectral Counts
NCBI_Gene	Description	enrichment ratio	p-value	dNSAF 1	dNSAF 2	dNSAF 3	dNSAF 4	avg dNSAF	dSC 1	dSC 2	dSC 3	dSC 4	avg dSCs	dNSAF 1	dNSAF 2	dNSAF 3	dNSAF 4	avg dNSAF	dSC 1	dSC 2	dSC 3	dSC 4	avg dSCs
DCTN3	1 genes:DCTN3.gi|526479822|ref|NP_001268354.1|:DCTN3:dynactin subunit 3 isoform 3 [Homo sapiens] ;gi|6005745|ref|NP_009165.1|:DCTN3:dynactin subunit 3 isoform 1 [Homo sapiens] ;	∞	0.0309282	0	0.00023196	0.00035221	0.00025139	0.00027852	0	1	1	1	0.75	0	0	0	0	#DIV/0!	0	0	0	0	0
DCTN4	dynactin subunit 4 isoform b [Homo sapiens]	∞	0.134494	0	7.967e-05	0	8.635e-05	8.301e-05	0	1	0	1	0.5	0	0	0	0	#DIV/0!	0	0	0	0	0
ACTR10	actin-related protein 10 [Homo sapiens]	∞	0.147368	0	8.789e-05	0.00013345	0	0.00011067	0	1	1	0	0.5	0	0	0	0	#DIV/0!	0	0	0	0	0
BICD1	protein bicaudal D homolog 1 isoform 1 [Homo sapiens]	∞	0.176437	0	3.809e-05	0	8.343e-05	6.076e-05	0	1.01333	0	2.0479	0.765309	0	0	0	0	#DIV/0!	0	0	0	0	0
DYNC1LI2	cytoplasmic dynein 1 light intermediate chain 2 isoform 1 [Homo sapiens]	270.324	1.89906e-05	0.151712	0.136172	0.10074	0.13113	0.129939	1771.39	1828.07	890.659	1624.28	1528.6	0.00071775	0.00041841	0	0.00030587	0.000480677	16.8889	6	0	4	6.72222
DYNC1I2	PREDICTED: cytoplasmic dynein 1 intermediate chain 2 isoform X5 [Homo sapiens]	19.3752	0.00125061	0.00080008	0.00075385	0.00140883	0.00075417	0.000929233	12	13	16	12	13.25	0	0	4.796e-05	0	4.796e-05	0	0	1	0	0.25
HOOK3	protein Hook homolog 3 [Homo sapiens]	5.23487	0.00318006	0.00035213	0.00030626	0.00062004	0.00033192	0.000402587	6	6	8	6	6.5	5.824e-05	9.557e-05	0	0	7.6905e-05	2	2	0	0	1
DYNC1H1	cytoplasmic dynein 1 heavy chain 1 [Homo sapiens]	5.00929	6.24445e-07	0.00203161	0.00189319	0.00200029	0.00203472	0.00198995	224	240	167	238	217.25	0.00020252	0.00045048	0.00045014	0.00048587	0.000397253	45	61	69	60	58.75
BICD2	protein bicaudal D homolog 2 isoform 1 [Homo sapiens]	4.45471	0.000587335	0.00433698	0.00647193	0.00683405	0.00784883	0.00637295	88	150.987	105	168.952	128.235	0.00180967	0.0014045	0.0012762	0.00123207	0.00143061	74	35	36	28	43.25
DCTN2	dynactin subunit 2 isoform 3 [Homo sapiens]	3.86478	0.00674227	0.00073557	0.00091394	0.00124897	0.00049526	0.000848435	7	10	9	5	7.75	0.00026071	0.00017112	0.00022676	0	0.00021953	5	2	3	0	2.5
DCTN1	1 genes:DCTN1.gi|13259510|ref|NP_004073.2|:DCTN1:dynactin subunit 1 isoform 1 [Homo sapiens] ;gi|205277392|ref|NP_001128512.1|:DCTN1:dynactin subunit 1 isoform 3 [Homo sapiens] ;gi|299890871|ref|NP_001177765.1|:DCTN1:dynactin subunit 1 isoform 5 [Homo sapiens] ;gi|299890875|ref|NP_001177766.1|:DCTN1:dynactin subunit 1 isoform 6 [Homo sapiens] ;	2.89041	0.0532185	0.00013189	0.00045883	0.0006967	0.00059051	0.000469483	4	16	16	19	13.75	6.544e-05	0.00024162	0.00016602	0.00017663	0.000162427	4	9	7	6	6.5
HOOK1	PREDICTED: protein Hook homolog 1 isoform X1 [Homo sapiens]	2.47984	0.00528984	0.00086822	0.00130889	0.00084085	0.00136401	0.00109549	15	26	11	25	19.25	0.00045954	0.00061268	0.00033307	0.00036175	0.00044176	16	13	8	7	11
DYNC1LI1	cytoplasmic dynein 1 light intermediate chain 1 [Homo sapiens]	2.09202	0.02167	0.00029087	0.00041564	0.00024906	0.00043466	0.000347558	3.61017	5.93144	2.34076	5.72331	4.40142	8.44e-05	0.00026241	0.00017386	0.00014387	0.000166135	2.11111	4	3	2	2.77778
DYNLRB1	dynein light chain roadblock-type 1 isoform a [Homo sapiens]	1.86087	0.951565	0.0013168	0	0	0	0.0013168	3	0	0	0	0.75	0	0	0.00063145	0.0007838	0.000707625	0	0	2	2	1
DYNLT1	dynein light chain Tctex-type 1 [Homo sapiens]	1.26643	0.874278	0	0	0	0.00070301	0.00070301	0	0	0	2	0.5	0.00055511	0	0	0	0.00055511	3	0	0	0	0.75
CAPZA1	F-actin-capping protein subunit alpha-1 [Homo sapiens]	0.965041	0.694504	0.00039289	0.00038443	0.00038915	0.0006944	0.000465217	2.66667	3	2	5	3.16667	0.001062	0	0.00012112	0.00026309	0.00048207	14.5263	0	1.14286	2	4.41729
DYNLL2	dynein light chain 2, cytoplasmic [Homo sapiens]	0.652878	0.114273	0	0	0.00062527	0.00133887	0.00098207	0	0	1	3	1	0.0014096	0.00278421	0.00076626	0.0010568	0.00150422	6	7.22222	2.25	2.5	4.49306
CAPZB	1 genes:CAPZB.gi|4826659|ref|NP_004921.1|:CAPZB:F-actin-capping protein subunit beta isoform 1 [Homo sapiens] ;gi|531990816|ref|NP_001269091.1|:CAPZB:F-actin-capping protein subunit beta isoform 4 [Homo sapiens] ;	0.627854	0.814553	0.00092951	0.00026948	0.00020459	0.00014603	0.000387402	6	2	1	1	2.5	0.00115307	0.00025228	0.00044573	0	0.000617027	15	2	4	0	5.25
CAPZA2	F-actin-capping protein subunit alpha-2 [Homo sapiens]	0.510999	0.0370083	0.00078578	0.00025629	0.00019458	0	0.000412217	5.33333	2	1	0	2.08333	0.0006195	0.00095972	0.00072671	0.00092082	0.000806688	8.47368	8	6.85714	7	7.58271
ACTR1A	alpha-centractin [Homo sapiens]	0.482026	0.41536	0.00022414	9.747e-05	0.000148	0.00021128	0.000170222	2	1	1	2	1.5	0	0.00045625	0.00040305	0.00020012	0.00035314	0	5	5	2	3
DYNLL1	dynein light chain 1, cytoplasmic [Homo sapiens]	0.408953	0.0131141	0.00094691	0.00082357	0	0.00044629	0.000738923	2	2	0	1	1.25	0.00164453	0.00222736	0.00229877	0.0010568	0.00180686	7	5.77778	6.75	2.5	5.50694

## Sheet: TcTex-mapping
				BioID-TcTex										BioID control
				distributed normalized spectral abundance factor (dNSAF)					distributed Spectral Counts					distributed normalized spectral abundance factor (dNSAF)					distributed Spectral Counts
NCBI_Gene	Description	enrichment ratio	p-value	dNSAF 1	dNSAF 2	dNSAF 3	dNSAF 4	avg dNSAF	dSC 1	dSC 2	dSC 3	dSC 4	avg dSCs	dNSAF 1	dNSAF 2	dNSAF 3	dNSAF 4	avg dNSAF	dSC 1	dSC 2	dSC 3	dSC 4	avg dSCs
DYNLT3	dynein light chain Tctex-type 3 [Homo sapiens]	∞	0.000744926	0.0020105	0.00165049	0.00226142	0.00099715	0.00172989	6	4	7	2	4.75	0	0	0	0	#DIV/0!	0	0	0	0	0
DYNC1I1	cytoplasmic dynein 1 intermediate chain 1 isoform b [Homo sapiens]	∞	0.00283989	0.00043326	0.00015243	0.00036518	0.00049413	0.00036125	7	2	6.11966	5.3655	5.12129	0	0	0	0	#DIV/0!	0	0	0	0	0
ACTR1B	beta-centractin [Homo sapiens]	∞	0.355918	0	0	0	7.691e-05	7.691e-05	0	0	0	0.5	0.125	0	0	0	0	#DIV/0!	0	0	0	0	0
DCTN4	dynactin subunit 4 isoform b [Homo sapiens]	∞	0.355918	0.000169	0	0	0	0.000169	2	0	0	0	0.5	0	0	0	0	#DIV/0!	0	0	0	0	0
DYNC1I2	PREDICTED: cytoplasmic dynein 1 intermediate chain 2 isoform X5 [Homo sapiens]	563.708	3.77634e-05	0.0276762	0.0265071	0.020865	0.0330934	0.0270354	450	350	351.88	361.635	378.379	0	0	4.796e-05	0	4.796e-05	0	0	1	0	0.25
DYNLT1	dynein light chain Tctex-type 1 [Homo sapiens]	50.1918	0.000238626	0.0295822	0.0211788	0.0371433	0.0235434	0.0278619	86	50	112	46	73.5	0.00055511	0	0	0	0.00055511	3	0	0	0	0.75
DYNC1LI2	cytoplasmic dynein 1 light intermediate chain 2 isoform 1 [Homo sapiens]	7.46239	0.000226463	0.00300213	0.0030543	0.00363852	0.00465303	0.00358699	38	31.3953	47.7692	39.5833	39.187	0.00071775	0.00041841	0	0.00030587	0.000480677	16.8889	6	0	4	6.72222
DCTN1	1 genes:DCTN1.gi|13259510|ref|NP_004073.2|:DCTN1:dynactin subunit 1 isoform 1 [Homo sapiens] ;gi|205277392|ref|NP_001128512.1|:DCTN1:dynactin subunit 1 isoform 3 [Homo sapiens] ;gi|299890871|ref|NP_001177765.1|:DCTN1:dynactin subunit 1 isoform 5 [Homo sapiens] ;gi|299890875|ref|NP_001177766.1|:DCTN1:dynactin subunit 1 isoform 6 [Homo sapiens] ;	7.40704	4.50608e-06	0.00136865	0.00112357	0.0011436	0.00117661	0.00120311	45	30	39	26	35	6.544e-05	0.00024162	0.00016602	0.00017663	0.000162427	4	9	7	6	6.5
DYNC1LI1	cytoplasmic dynein 1 light intermediate chain 1 [Homo sapiens]	5.95638	0.00453042	0.00111481	0.00124508	0.00044646	0.0011519	0.000989562	15	13.6047	6.23077	10.4167	11.313	8.44e-05	0.00026241	0.00017386	0.00014387	0.000166135	2.11111	4	3	2	2.77778
DYNLL1	dynein light chain 1, cytoplasmic [Homo sapiens]	2.95031	0.00342844	0.00336288	0.00552141	0.00581073	0.00662825	0.00533082	7.7	10.2667	13.8	10.2	10.4917	0.00164453	0.00222736	0.00229877	0.0010568	0.00180686	7	5.77778	6.75	2.5	5.50694
DYNC1H1	cytoplasmic dynein 1 heavy chain 1 [Homo sapiens]	2.90875	0.000240529	0.00117964	0.00097871	0.0013309	0.00113279	0.00115551	141	95	165	91	123	0.00020252	0.00045048	0.00045014	0.00048587	0.000397253	45	61	69	60	58.75
DYNLL2	dynein light chain 2, cytoplasmic [Homo sapiens]	2.66652	0.0625358	0.00144124	0.00631019	0.00387382	0.00441884	0.00401102	3.3	11.7333	9.2	6.8	7.75833	0.0014096	0.00278421	0.00076626	0.0010568	0.00150422	6	7.22222	2.25	2.5	4.49306
CAPZA1	F-actin-capping protein subunit alpha-1 [Homo sapiens]	1.16417	0.88058	0.00022651	0.00128865	0.00016847	0	0.00056121	1.66667	7.7	1.28571	0	2.6631	0.001062	0	0.00012112	0.00026309	0.00048207	14.5263	0	1.14286	2	4.41729
DCTN2	dynactin subunit 2 isoform 3 [Homo sapiens]	1.08741	0.253682	0	0.00023872	0	0	0.00023872	0	2	0	0	0.5	0.00026071	0.00017112	0.00022676	0	0.00021953	5	2	3	0	2.5
CAPZA2	F-actin-capping protein subunit alpha-2 [Homo sapiens]	0.875494	0.527294	0.00045303	0.00055228	0.00101081	0.00080888	0.00070625	3.33333	3.3	7.71429	4	4.5869	0.0006195	0.00095972	0.00072671	0.00092082	0.000806688	8.47368	8	6.85714	7	7.58271
CAPZB	1 genes:CAPZB.gi|4826659|ref|NP_004921.1|:CAPZB:F-actin-capping protein subunit beta isoform 1 [Homo sapiens] ;gi|531990816|ref|NP_001269091.1|:CAPZB:F-actin-capping protein subunit beta isoform 4 [Homo sapiens] ;	0.855571	0.282947	0	0.00052791	0	0	0.00052791	0	3	0	0	0.75	0.00115307	0.00025228	0.00044573	0	0.000617027	15	2	4	0	5.25
ACTR1A	alpha-centractin [Homo sapiens]	0.592725	0.64522	0.00020675	0.0002546	0.000299	7.691e-05	0.000209315	2	2	3	0.5	1.875	0	0.00045625	0.00040305	0.00020012	0.00035314	0	5	5	2	3
BICD2	protein bicaudal D homolog 2 isoform 1 [Homo sapiens]	0.589404	0.0432923	0.00136385	0.00055982	0.0005698	0.00087936	0.000843208	30	10	13	13	16.5	0.00180967	0.0014045	0.0012762	0.00123207	0.00143061	74	35	36	28	43.25
HOOK1	PREDICTED: protein Hook homolog 1 isoform X1 [Homo sapiens]	0.349579	0.00158537	0	0	0.00015443	0	0.00015443	0	0	3	0	0.75	0.00045954	0.00061268	0.00033307	0.00036175	0.00044176	16	13	8	7	11

## Sheet: RB-mapping
				BioID-Roadblock										BioID control
				distributed normalized spectral abundance factor (dNSAF)					distributed Spectral Counts					distributed normalized spectral abundance factor (dNSAF)					distributed Spectral Counts
NCBI_Gene	Description	enrichment ratio	p-value	dNSAF 1	dNSAF 2	dNSAF 3	dNSAF 4	avg dNSAF	dSC 1	dSC 2	dSC 3	dSC 4	avg dSCs	dNSAF 1	dNSAF 2	dNSAF 3	dNSAF 4	avg dNSAF	dSC 1	dSC 2	dSC 3	dSC 4	avg dSCs
DCTN4	dynactin subunit 4 isoform b [Homo sapiens]	∞	0.13489	0	9.56e-05	8.59e-05	0	9.075e-05	0	1	1	0	0.5	0	0	0	0	#DIV/0!	0	0	0	0	0
BICD1	protein bicaudal D homolog 1 isoform 1 [Homo sapiens]	∞	0.355918	0	0	0	4.703e-05	4.703e-05	0	0	0	1.03448	0.258621	0	0	0	0	#DIV/0!	0	0	0	0	0
DYNLT3	dynein light chain Tctex-type 3 [Homo sapiens]	∞	0.355918	0	0	0.00034064	0	0.00034064	0	0	1	0	0.25	0	0	0	0	#DIV/0!	0	0	0	0	0
DYNLRB1	dynein light chain roadblock-type 1 isoform a [Homo sapiens]	83.5358	0.000128732	0.0788915	0.0558863	0.0485701	0.0531003	0.059112	173	122	118	115	132	0	0	0.00063145	0.0007838	0.000707625	0	0	2	2	1
DYNC1I2	PREDICTED: cytoplasmic dynein 1 intermediate chain 2 isoform X5 [Homo sapiens]	14.7801	0.0690861	0.00027708	0.00097415	0.00087533	0	0.000708853	4	14	14	0	8	0	0	4.796e-05	0	4.796e-05	0	0	1	0	0.25
DYNC1LI1	cytoplasmic dynein 1 light intermediate chain 1 [Homo sapiens]	5.79763	8.26563e-05	0.00100083	0.00084084	0.00116353	0.00084756	0.00096319	11.9565	10	15.4	10	11.8391	8.44e-05	0.00026241	0.00017386	0.00014387	0.000166135	2.11111	4	3	2	2.77778
DYNC1H1	cytoplasmic dynein 1 heavy chain 1 [Homo sapiens]	2.98216	0.000144839	0.00130976	0.00126836	0.00113968	0.00102088	0.00118467	139	134	134	107	128.5	0.00020252	0.00045048	0.00045014	0.00048587	0.000397253	45	61	69	60	58.75
DYNC1LI2	cytoplasmic dynein 1 light intermediate chain 2 isoform 1 [Homo sapiens]	1.90539	0.0402401	0.0011606	0.00116197	0.00053007	0.00081086	0.000915875	13.0435	13	6.6	9	10.4109	0.00071775	0.00041841	0	0.00030587	0.000480677	16.8889	6	0	4	6.72222
CAPZA1	F-actin-capping protein subunit alpha-1 [Homo sapiens]	1.88298	0.42923	0.00139949	0.00079078	0.00053292	0	0.00090773	9.14286	5.14286	3.85714	0	4.53571	0.001062	0	0.00012112	0.00026309	0.00048207	14.5263	0	1.14286	2	4.41729
DCTN1	1 genes:DCTN1.gi|13259510|ref|NP_004073.2|:DCTN1:dynactin subunit 1 isoform 1 [Homo sapiens] ;gi|205277392|ref|NP_001128512.1|:DCTN1:dynactin subunit 1 isoform 3 [Homo sapiens] ;gi|299890871|ref|NP_001177765.1|:DCTN1:dynactin subunit 1 isoform 5 [Homo sapiens] ;gi|299890875|ref|NP_001177766.1|:DCTN1:dynactin subunit 1 isoform 6 [Homo sapiens] ;	1.4386	0.329562	0.00037681	0.00020646	0.00024735	0.00010405	0.000233667	11	6	8	3	7	6.544e-05	0.00024162	0.00016602	0.00017663	0.000162427	4	9	7	6	6.5
DYNLL1	dynein light chain 1, cytoplasmic [Homo sapiens]	1.29987	0.340885	0.00147566	0.00352938	0.00239752	0.00199223	0.0023487	3	7.14286	5.4	4	4.88571	0.00164453	0.00222736	0.00229877	0.0010568	0.00180686	7	5.77778	6.75	2.5	5.50694
BICD2	protein bicaudal D homolog 2 isoform 1 [Homo sapiens]	1.2213	0.242843	0.00163847	0.00149159	0.00235702	0.00150171	0.0017472	32	29	51	28.9655	35.2414	0.00180967	0.0014045	0.0012762	0.00123207	0.00143061	74	35	36	28	43.25
DYNLT1	dynein light chain Tctex-type 1 [Homo sapiens]	1.11998	0.195424	0.00038742	0.00077834	0.00069937	0	0.00062171	1	2	2	0	1.25	0.00055511	0	0	0	0.00055511	3	0	0	0	0.75
DYNLL2	dynein light chain 2, cytoplasmic [Homo sapiens]	1.10304	0.689902	0.00196755	0.00141175	0.00159835	0	0.00165922	4	2.85714	3.6	0	2.61429	0.0014096	0.00278421	0.00076626	0.0010568	0.00150422	6	7.22222	2.25	2.5	4.49306
ACTR1A	alpha-centractin [Homo sapiens]	0.997876	0.997696	0.00023286	0.00011696	0	0.00070735	0.00035239	2	1	0	6	2.25	0	0.00045625	0.00040305	0.00020012	0.00035314	0	5	5	2	3
HOOK1	PREDICTED: protein Hook homolog 1 isoform X1 [Homo sapiens]	0.87921	0.629573	0.00054121	0.00036244	0.00016284	0.00048711	0.0003884	9	6	3	8	6.5	0.00045954	0.00061268	0.00033307	0.00036175	0.00044176	16	13	8	7	11
CAPZA2	F-actin-capping protein subunit alpha-2 [Homo sapiens]	0.82536	0.44653	0.00104962	0.00059308	0.00071055	0.00030998	0.000665807	6.85714	3.85714	5.14286	2	4.46429	0.0006195	0.00095972	0.00072671	0.00092082	0.000806688	8.47368	8	6.85714	7	7.58271
DCTN2	dynactin subunit 2 isoform 3 [Homo sapiens]	0.747073	0.330221	0.00021834	0.00010967	0	0	0.000164005	2	1	0	0	0.75	0.00026071	0.00017112	0.00022676	0	0.00021953	5	2	3	0	2.5
CAPZB	1 genes:CAPZB.gi|4826659|ref|NP_004921.1|:CAPZB:F-actin-capping protein subunit beta isoform 1 [Homo sapiens] ;gi|531990816|ref|NP_001269091.1|:CAPZB:F-actin-capping protein subunit beta isoform 4 [Homo sapiens] ;	0.706323	0.238671	0	0	0.00043582	0	0.00043582	0	0	3	0	0.75	0.00115307	0.00025228	0.00044573	0	0.000617027	15	2	4	0	5.25

## Sheet: p62-mapping
				p62-BioID										BioID control
				distributed normalized spectral abundance factor (dNSAF)					distributed Spectral Counts					distributed normalized spectral abundance factor (dNSAF)					distributed Spectral Counts
NCBI_Gene	Description	enrichment ratio	p-value	dNSAF 1	dNSAF 2	dNSAF 3	dNSAF 4	avg dNSAF	dSC 1	dSC 2	dSC 3	dSC 4	avg dSCs	dNSAF 1	dNSAF 2	dNSAF 3	dNSAF 4	avg dNSAF	dSC 1	dSC 2	dSC 3	dSC 4	avg dSCs
ACTR10	actin-related protein 10 [Homo sapiens]	∞	6.70804e-06	0.00501526	0.00649503	0.00543324	0.00481396	0.00543937	51	53	54	47	51.25	0	0	0	0	#DIV/0!	0	0	0	0	0
DCTN4	dynactin subunit 4 isoform b [Homo sapiens]	∞	0.000241465	0.0254958	0.048214	0.0349335	0.035933	0.0361441	286	434	383	387	372.5	0	0	0	0	#DIV/0!	0	0	0	0	0
BICD1	protein bicaudal D homolog 1 isoform 1 [Homo sapiens]	∞	0.000320237	0.00021974	0.0002761	0.00013627	0.00023808	0.000217547	5.22472	5.26786	3.16667	5.43478	4.77351	0	0	0	0	#DIV/0!	0	0	0	0	0
DCTN3	1 genes:DCTN3.gi|526479822|ref|NP_001268354.1|:DCTN3:dynactin subunit 3 isoform 3 [Homo sapiens] ;gi|6005745|ref|NP_009165.1|:DCTN3:dynactin subunit 3 isoform 1 [Homo sapiens] ;	∞	0.00126095	0.00129769	0.00129373	0.0005311	0.00135162	0.00111853	5	4	2	5	4	0	0	0	0	#DIV/0!	0	0	0	0	0
ACTR1B	beta-centractin [Homo sapiens]	∞	0.00243715	0.00411887	0.00239203	0.00333709	0.00150752	0.00283888	37.7665	17.6	29.9058	13.2712	24.6359	0	0	0	0	#DIV/0!	0	0	0	0	0
DCTN5	1 genes:DCTN5.gi|14210488|ref|NP_115875.1|:DCTN5:dynactin subunit 5 isoform 1 [Homo sapiens] ;gi|312261189|ref|NP_001185940.1|:DCTN5:dynactin subunit 5 isoform 2 [Homo sapiens] ;gi|317008627|ref|NP_001186672.1|:DCTN5:dynactin subunit 5 isoform 3 [Homo sapiens] ;	∞	0.355918	0.00045063	0	0	0	0.00045063	2	0	0	0	0.5	0	0	0	0	#DIV/0!	0	0	0	0	0
DCTN6	dynactin subunit 6 [Homo sapiens]	∞	0.355918	0	0	0.00066247	0	0.00066247	0	0	3	0	0.75	0	0	0	0	#DIV/0!	0	0	0	0	0
ACTR1A	alpha-centractin [Homo sapiens]	81.563	0.000398247	0.036452	0.0334884	0.0270145	0.0182577	0.0288032	334.234	246.4	242.094	160.729	245.864	0	0.00045625	0.00040305	0.00020012	0.00035314	0	5	5	2	3
DCTN2	dynactin subunit 2 isoform 3 [Homo sapiens]	30.5716	9.41545e-06	0.00582895	0.00802856	0.00627781	0.00671022	0.00671138	57	63	60	63	60.75	0.00026071	0.00017112	0.00022676	0	0.00021953	5	2	3	0	2.5
CAPZB	1 genes:CAPZB.gi|4826659|ref|NP_004921.1|:CAPZB:F-actin-capping protein subunit beta isoform 1 [Homo sapiens] ;gi|531990816|ref|NP_001269091.1|:CAPZB:F-actin-capping protein subunit beta isoform 4 [Homo sapiens] ;	7.92556	0.00139669	0.00542742	0.00544842	0.00601585	0.00266944	0.00489028	36	29	39	17	30.25	0.00115307	0.00025228	0.00044573	0	0.000617027	15	2	4	0	5.25
CAPZA1	F-actin-capping protein subunit alpha-1 [Homo sapiens]	6.19894	0.0103146	0.00271122	0.00448324	0.00346749	0.00129135	0.00298833	18.9091	25.0909	23.6364	8.64706	19.0709	0.001062	0	0.00012112	0.00026309	0.00048207	14.5263	0	1.14286	2	4.41729
DCTN1	1 genes:DCTN1.gi|13259510|ref|NP_004073.2|:DCTN1:dynactin subunit 1 isoform 1 [Homo sapiens] ;gi|205277392|ref|NP_001128512.1|:DCTN1:dynactin subunit 1 isoform 3 [Homo sapiens] ;gi|299890871|ref|NP_001177765.1|:DCTN1:dynactin subunit 1 isoform 5 [Homo sapiens] ;gi|299890875|ref|NP_001177766.1|:DCTN1:dynactin subunit 1 isoform 6 [Homo sapiens] ;	2.88129	0.0266795	0.000738	0.00043985	0.00042679	0.00026736	0.000468	23	11	13	8	13.75	6.544e-05	0.00024162	0.00016602	0.00017663	0.000162427	4	9	7	6	6.5
CAPZA2	F-actin-capping protein subunit alpha-2 [Homo sapiens]	2.76704	0.00116892	0.00288067	0.00194923	0.00225387	0.00184478	0.00223214	20.0909	10.9091	15.3636	12.3529	14.6791	0.0006195	0.00095972	0.00072671	0.00092082	0.000806688	8.47368	8	6.85714	7	7.58271
BICD2	protein bicaudal D homolog 2 isoform 1 [Homo sapiens]	2.69167	0.000335129	0.00420984	0.00321151	0.00450646	0.0034751	0.00385073	87.7753	53.7321	91.8333	69.5652	75.7265	0.00180967	0.0014045	0.0012762	0.00123207	0.00143061	74	35	36	28	43.25
DYNC1LI1	cytoplasmic dynein 1 light intermediate chain 1 [Homo sapiens]	2.23439	0.0986062	0.00062726	0.00029313	0.00040112	0.00016333	0.00037121	8	3	5	2	4.5	8.44e-05	0.00026241	0.00017386	0.00014387	0.000166135	2.11111	4	3	2	2.77778
DYNLT1	dynein light chain Tctex-type 1 [Homo sapiens]	1.69624	0.420298	0	0	0.0003713	0.0015119	0.0009416	0	0	1	4	1.25	0.00055511	0	0	0	0.00055511	3	0	0	0	0.75
DYNC1LI2	cytoplasmic dynein 1 light intermediate chain 2 isoform 1 [Homo sapiens]	1.05634	0.412377	0.00066678	0.00041547	0.00034111	0.00060768	0.00050776	8	4	4	7	5.75	0.00071775	0.00041841	0	0.00030587	0.000480677	16.8889	6	0	4	6.72222
DYNC1H1	cytoplasmic dynein 1 heavy chain 1 [Homo sapiens]	0.926577	0.707374	0.00044132	0.00027498	0.00038832	0.00036772	0.000368085	50	25	43	40	39.5	0.00020252	0.00045048	0.00045014	0.00048587	0.000397253	45	61	69	60	58.75
HOOK1	PREDICTED: protein Hook homolog 1 isoform X1 [Homo sapiens]	0.89642	0.735271	0.00028164	0.00014039	0.00063396	0.00052802	0.000396003	5	2	11	9	6.75	0.00045954	0.00061268	0.00033307	0.00036175	0.00044176	16	13	8	7	11
HOOK3	protein Hook homolog 3 [Homo sapiens]	0.773552	0.428656	0	0	0	5.949e-05	5.949e-05	0	0	0	1	0.25	5.824e-05	9.557e-05	0	0	7.6905e-05	2	2	0	0	1
DYNLL1	dynein light chain 1, cytoplasmic [Homo sapiens]	0.701266	0.179525	0.00184302	0.00172255	0.00023571	0	0.00126709	4	3	0.5	0	1.875	0.00164453	0.00222736	0.00229877	0.0010568	0.00180686	7	5.77778	6.75	2.5	5.50694
DYNLL2	dynein light chain 2, cytoplasmic [Homo sapiens]	0.485779	0.12644	0.00138226	0.00057418	0.00023571	0	0.000730717	3	1	0.5	0	1.125	0.0014096	0.00278421	0.00076626	0.0010568	0.00150422	6	7.22222	2.25	2.5	4.49306

## Sheet: mapping color code
IC1	IC2	LIC1	LIC2	TcTex	RB	p62
DYNC1I1	ACTR10	DYNLT3	DCTN3	DYNLT3	DYNC1LI1	ACTR10
BICD1	DYNLT3	BICD1	DYNC1LI2	DYNC1I1	DYNLRB1	DCTN4
DYNLT3	DCTN4	DYNC1I2	DYNC1I2	DCTN1	DYNC1H1	BICD1
DCTN4	BICD2	DYNC1H1	HOOK3	DYNC1I2		DCTN3
ACTR10	DCTN1	DYNC1LI1	DYNC1H1	DYNC1LI2		ACTR1B
DYNC1H1	DYNC1LI1	BICD2	BICD2	DYNLT1		ACTR1A
BICD2	DYNC1H1	HOOK3	DCTN2	DYNC1LI1		DCTN2
DCTN2	DYNC1LI2	DCTN1	HOOK1	DYNLL1		CAPZB
DCTN1	DYNC1I2		DYNC1LI1	DYNC1H1		CAPZA1
DYNC1LI2	DYNLT1					DCTN1
DYNC1I2	ACTR1A					CAPZA2
DYNLRB1	DCTN2					BICD2
DYNC1LI1	DYNLL1
ACTR1A	HOOK3
DYNLT1	HOOK1
HOOK1

## Sheet: IC1 network
				IC1-BioID										BioID control
				distributed normalized spectral abundance factor (dNSAF)					distributed Spectral Counts					distributed normalized spectral abundance factor (dNSAF)					distributed Spectral Counts
NCBI_Gene	Description	enrichment ratio	p-value	dNSAF 1	dNSAF 2	dNSAF 3	dNSAF 4	avg dNSAF	dSC 1	dSC 2	dSC 3	dSC 4	avg dSCs	dNSAF 1	dNSAF 2	dNSAF 3	dNSAF 4	avg dNSAF	dSC 1	dSC 2	dSC 3	dSC 4	avg dSCs
DNAJC7	1 genes:DNAJC7. 2 proteins in this group did not match any genes. gi|221219056|ref|NP_001138238.1|:DNAJC7:dnaJ homolog subfamily C member 7 isoform 2 [Homo sapiens] ;gi|262206280|ref|NP_003306.3|:DNAJC7:dnaJ homolog subfamily C member 7 isoform 1 [Homo sapiens] ;gi|578831332|ref|XP_006722113.1|:PREDICTED: dnaJ homolog subfamily C member 7 isoform X1 [Homo sapiens] ;gi|578831338|ref|XP_006722116.1…	∞	0.0131495	9.102e-05	0.00036648	0.00043335	0.00019711	0.00027199	1	4	4	2	2.75	0	0	0	0	0	0	0	0	0	0
	AH receptor-interacting protein [Homo sapiens]	∞	0.0335929	0.00036241	0.00060802	0.00043138	0	0.00046727	3	5	3	0	2.75	0	0	0	0	0	0	0	0	0	0
ACTR10	actin-related protein 10 [Homo sapiens]	∞	0.0164594	0.00038239	0.00019247	0.00011379	0.00051759	0.00030156	4	2	1	5	3	0	0	0	0	0	0	0	0	0	0
FKBP4	peptidyl-prolyl cis-trans isomerase FKBP4 [Homo sapiens]	∞	0.0258401	0.0001737	0.00017486	0.00020676	0.00056427	0.000279897	2	2	2	6	3	0	0	0	0	0	0	0	0	0	0
PFDN1	1 genes:PFDN1.gi|21536449|ref|NP_002613.2|:PFDN1:prefoldin subunit 1 [Homo sapiens] ;gi|530380590|ref|XP_005268522.1|:PFDN1:PREDICTED: prefoldin subunit 1 isoform X1 [Homo sapiens] ;	∞	0.00400418	0.00065352	0.00131571	0.00194475	0.00212295	0.00150923	2	4	5	6	4.25	0	0	0	0	0	0	0	0	0	0
DBT	lipoamide acyltransferase component of branched-chain alpha-keto acid dehydrogenase complex, mitochondrial precursor [Homo sapiens]	∞	0.0052464	0.00016541	0.00049953	0.00029534	0.00053734	0.000374405	2	6	3	6	4.25	0	0	0	0	0	0	0	0	0	0
DYNLT3	dynein light chain Tctex-type 3 [Homo sapiens]	∞	0.00134479	0.0017183	0.00138377	0.0012272	0.00260488	0.00173354	5	4	3	7	4.75	0	0	0	0	0	0	0	0	0	0
DCTN4	dynactin subunit 4 isoform b [Homo sapiens]	∞	0.00497881	0.00034665	0.00026171	0.00061894	0.00075072	0.000494505	4	3	6	8	5.25	0	0	0	0	0	0	0	0	0	0
BICD1	protein bicaudal D homolog 1 isoform 1 [Homo sapiens]	∞	0.000175674	0.00043205	0.00038742	0.00025453	0.00047027	0.000386067	10.567	9.41284	5.22989	10.622	8.95794	0	0	0	0	0	0	0	0	0	0
DYNC1I1	cytoplasmic dynein 1 intermediate chain 1 isoform b [Homo sapiens]	∞	4.07437e-07	0.0417568	0.0425682	0.0486649	0.0401932	0.0432958	657.809	666.168	644.055	584.742	638.193	0	0	0	0	0	0	0	0	0	0
DYNC1LI1	cytoplasmic dynein 1 light intermediate chain 1 [Homo sapiens]	63.0491	0.000433874	0.00826631	0.00860241	0.0146983	0.0103317	0.0104747	108.449	112.114	162	125.177	126.935	8.44e-05	0.00026241	0.00017386	0.00014387	0.000166135	2.11111	4	3	2	2.77778
DYNC1I2	PREDICTED: cytoplasmic dynein 1 intermediate chain 2 isoform X5 [Homo sapiens]	44.3085	0.000119624	0.00165207	0.00265612	0.0023985	0.00179345	0.00212503	26.1915	41.8316	31.9451	26.2579	31.5565	0	0	4.796e-05	0	4.796e-05	0	0	1	0	0.25
PFDN6	prefoldin subunit 6 [Homo sapiens]	40.5625	0.00250116	0.0105069	0.00528835	0.00514981	0.005354	0.00657478	34	17	14	16	20.25	0.00016209	0	0	0	0.00016209	1	0	0	0	0.25
PFDN5	prefoldin subunit 5 isoform alpha [Homo sapiens]	39.3165	0.000408844	0.0243329	0.0304878	0.0194121	0.0159772	0.0225525	94	117	63	57	82.75	0.00095041	0	0.00019682	0	0.000573615	7	0	1	0	2
DYNLRB1	dynein light chain roadblock-type 1 isoform a [Homo sapiens]	35.5349	0.000203929	0.034051	0.0238267	0.0197716	0.0229323	0.0251454	82	57	40	51	57.5	0	0	0.00063145	0.0007838	0.000707625	0	0	2	2	1
DYNC1H1	cytoplasmic dynein 1 heavy chain 1 [Homo sapiens]	28.9291	1.87532e-08	0.0118667	0.0107794	0.011337	0.0119856	0.0114922	1383	1248	1110	1290	1257.75	0.00020252	0.00045048	0.00045014	0.00048587	0.000397253	45	61	69	60	58.75
PFDN4	prefoldin subunit 4 [Homo sapiens]	23.8213	0.00428892	0.0116024	0.00479155	0.00637413	0.00547636	0.0070611	39	16	18	17	22.5	0.00031208	0	0	0.00028076	0.00029642	2	0	0	1	0.75
PFDN2	prefoldin subunit 2 [Homo sapiens]	21.4483	8.80108e-06	0.00828355	0.0112049	0.00893573	0.00896969	0.00934847	32	43	29	32	34	0.00027155	0.00044558	0.00059045	0	0.00043586	2	2	3	0	1.75
DYNC1LI2	cytoplasmic dynein 1 light intermediate chain 2 isoform 1 [Homo sapiens]	18.039	1.09442e-05	0.00701283	0.00863641	0.00983757	0.00919686	0.00867092	86.5508	105.886	102	104.823	99.8149	0.00071775	0.00041841	0	0.00030587	0.000480677	16.8889	6	0	4	6.72222
CCT2	T-complex protein 1 subunit beta isoform 1 [Homo sapiens]	17.6094	3.75892e-07	0.0151262	0.0145515	0.0125947	0.0141199	0.0140981	203	194	142	175	178.5	0.00121155	0.00070544	0.00079315	0.00049225	0.000800597	31	11	14	7	15.75
VBP1	prefoldin subunit 3 [Homo sapiens]	15.7115	2.51985e-06	0.0109273	0.0128332	0.0108392	0.0100795	0.0111698	54	63	45	46	52	0.00095524	0.00104497	0.00046157	0.00038195	0.000710933	9	6	3	2	5
CCT7	T-complex protein 1 subunit eta isoform a [Homo sapiens]	12.204	1.92738e-05	0.00660739	0.0051732	0.0052433	0.00500828	0.00550804	90	70	60	63	70.75	0.00100117	0.0004423	0.00022328	0.00013857	0.00045133	26	7	4	2	9.75
CCT8	T-complex protein 1 subunit theta isoform 1 [Homo sapiens]	11.5752	2.64409e-05	0.02888	0.0213827	0.0256309	0.0311146	0.0267521	397	292	296	395	345	0.00301426	0.00187828	0.00188053	0.00247153	0.00231115	79	30	34	36	44.75
DCTN1	1 genes:DCTN1.gi|13259510|ref|NP_004073.2|:DCTN1:dynactin subunit 1 isoform 1 [Homo sapiens] ;gi|205277392|ref|NP_001128512.1|:DCTN1:dynactin subunit 1 isoform 3 [Homo sapiens] ;gi|299890871|ref|NP_001177765.1|:DCTN1:dynactin subunit 1 isoform 5 [Homo sapiens] ;gi|299890875|ref|NP_001177766.1|:DCTN1:dynactin subunit 1 isoform 6 [Homo sapiens] ;	9.08679	9.44416e-06	0.0013101	0.001727	0.00144806	0.00141862	0.00147594	42	55	39	42	44.5	6.544e-05	0.00024162	0.00016602	0.00017663	0.000162427	4	9	7	6	6.5
DCTN2	dynactin subunit 2 isoform 3 [Homo sapiens]	8.16358	2.12202e-06	0.00198826	0.00180131	0.00165667	0.00172236	0.00179215	20	18	14	16	17	0.00026071	0.00017112	0.00022676	0	0.00021953	5	2	3	0	2.5
DYNLT1	dynein light chain Tctex-type 1 [Homo sapiens]	7.24087	0.00904596	0.00670289	0.00177563	0.00377935	0.00382005	0.00401948	19	5	9	10	10.75	0.00055511	0	0	0	0.00055511	3	0	0	0	0.75
RAD50	DNA repair protein RAD50 [Homo sapiens]	7.21008	0.00647899	0.00057731	0.00171283	0.00173604	0.00121735	0.00131088	19	56	48	37	40	7.968e-05	0.00031381	0.00016171	0.00017205	0.000181812	5	12	7	6	7.5
BICD2	protein bicaudal D homolog 2 isoform 1 [Homo sapiens]	6.95635	4.26204e-07	0.00906548	0.0102593	0.0098106	0.0106719	0.00995183	194.433	218.587	176.77	211.378	200.292	0.00180967	0.0014045	0.0012762	0.00123207	0.00143061	74	35	36	28	43.25
CCT5	T-complex protein 1 subunit epsilon [Homo sapiens]	6.66087	9.93137e-05	0.018348	0.0226237	0.0148232	0.0168358	0.0181577	249	305	169	211	233.5	0.00367165	0.00190259	0.00240909	0.00292076	0.00272602	95	30	43	42	52.5
CCT6A	T-complex protein 1 subunit zeta isoform a [Homo sapiens]	6.41707	4.33726e-05	0.0169668	0.0172306	0.0122365	0.0143761	0.0152025	226	228	136.93	176.843	191.943	0.00145694	0.00284301	0.0026257	0.00255066	0.00236908	37	44	46	36	40.75
STUB1	E3 ubiquitin-protein ligase CHIP [Homo sapiens]	5.93859	6.19687e-05	0.00131566	0.0013244	0.00140946	0.00170957	0.00143977	10	10	9	12	10.25	0.00041404	0.00011323	0.00020006	0	0.000242443	6	1	2	0	2.25
	PREDICTED: C-Jun-amino-terminal kinase-interacting protein 3 isoform X2 [Homo sapiens]	5.58729	0.008235	2.995e-05	9.045e-05	8.913e-05	0.00012973	8.4815e-05	1	3	2.5	4	2.625	0	0	1.518e-05	0	1.518e-05	0	0	0.666667	0	0.166667
RPL28	1 genes:RPL28. 1 proteins in this group did not match any genes. gi|13904866|ref|NP_000982.2|:RPL28:60S ribosomal protein L28 isoform 2 [Homo sapiens] ;gi|209915581|ref|NP_001129606.1|:RPL28:60S ribosomal protein L28 isoform 1 [Homo sapiens] ;gi|209915584|ref|NP_001129607.1|:RPL28:60S ribosomal protein L28 isoform 3 [Homo sapiens] ;gi|530416988|ref|XP_005259189.1|:PREDICTED: 60S ribosomal protein…	5.25878	0.00156095	0.00116393	0.00234331	0.00242455	0.00220559	0.00203434	4	8	7	7	6.5	0.00030524	0.00025044	0.00044248	0.00054923	0.000386848	2	1	2	2	1.75
ACTR1A	alpha-centractin [Homo sapiens]	5.16704	0.00635796	0.00148432	0.00096054	0.00252403	0.00232986	0.00182469	14	9	20	20.2941	15.8235	0	0.00045625	0.00040305	0.00020012	0.00035314	0	5	5	2	3
KRT19	keratin, type I cytoskeletal 19 [Homo sapiens]	4.9477	0.0100108	0.00089695	0.00153351	0.00216292	0.00217943	0.0016932	9	15.2857	18.2326	20.1955	15.6784	0.00014811	0.00012866	0.00015155	0.00094056	0.00034222	2.83333	1.5	2	10	4.08333
HSP90AA1	heat shock protein HSP 90-alpha isoform 1 [Homo sapiens]	4.86833	0.001024	0.00052515	0.00085291	0.00058841	0.0006617	0.000657042	11.25	18.1509	10.5897	13.0909	13.2704	0.00016202	0.00027075	4.947e-05	5.761e-05	0.000134963	6.61765	6.73913	1.39394	1.30769	4.0146
SUGT1	suppressor of G2 allele of SKP1 homolog isoform SGT1B [Homo sapiens]	4.51937	0.00385888	0.00109218	0.00241875	0.00234009	0.00165571	0.00187668	10	22	18	14	16	0.00068742	0	0.00024912	0.00030922	0.000415253	12	0	3	3	4.5
NIN	1 genes:NIN.gi|148536869|ref|NP_065972.3|:NIN:ninein isoform 2 [Homo sapiens] ;gi|33946321|ref|NP_891991.1|:NIN:ninein isoform 5 [Homo sapiens] ;	4.39046	0.00152381	3.738e-05	7.525e-05	8.899e-05	8.095e-05	7.06425e-05	2	4	4	4	3.5	0	1.609e-05	0	0	1.609e-05	0	1	0	0	0.25
CALD1	1 genes:CALD1. 1 proteins in this group did not match any genes. gi|15149463|ref|NP_149130.1|:CALD1:caldesmon isoform 4 [Homo sapiens] ;gi|15149465|ref|NP_149131.1|:CALD1:caldesmon isoform 5 [Homo sapiens] ;gi|578814641|ref|XP_006716200.1|:PREDICTED: caldesmon isoform X2 [Homo sapiens] ;	4.17703	0.000425731	0.00042865	0.00057533	0.00059527	0.00061888	0.000554533	6	8	7	8	7.25	0.00022483	0.00018446	5.432e-05	6.742e-05	0.000132758	6	3	1	1	2.75
PPM1A	1 genes:PPM1A. 1 proteins in this group did not match any genes. gi|193211600|ref|NP_808821.2|:PPM1A:protein phosphatase 1A isoform 3 [Homo sapiens] ;gi|578825910|ref|XP_006720243.1|:PREDICTED: protein phosphatase 1A isoform X7 [Homo sapiens] ;	4.12626	0.0069852	0.00026284	0.00035278	0.00010429	0.00037949	0.00027485	3	4	1	4	3	0	0	6.661e-05	0	6.661e-05	0	0	1	0	0.25
CCT4	T-complex protein 1 subunit delta isoform a [Homo sapiens]	4.02786	0.000403685	0.00391989	0.00312695	0.00510613	0.0047251	0.00421952	53	42	58	59	53	0.00096981	0.00114579	0.00123713	0.0008376	0.00104758	25	18	22	12	19.25
EIF4E	1 genes:EIF4E.gi|194578907|ref|NP_001124150.1|:EIF4E:eukaryotic translation initiation factor 4E isoform 3 [Homo sapiens] ;gi|194578909|ref|NP_001124151.1|:EIF4E:eukaryotic translation initiation factor 4E isoform 2 [Homo sapiens] ;gi|4503535|ref|NP_001959.1|:EIF4E:eukaryotic translation initiation factor 4E isoform 1 [Homo sapiens] ;gi|578808863|ref|XP_006714189.1|:EIF4E:PREDICTED: eukaryotic tr…	4.00876	0.00148612	0.00084102	0.00067729	0.00120131	0.00109283	0.000953112	5	4	6	6	5.25	8.822e-05	0.00028954	0.00025578	0.00031749	0.000237758	1	2	2	2	1.75
TTC1	tetratricopeptide repeat protein 1 [Homo sapiens]	3.95865	0.00267999	0.00027305	0.00054972	0.00065003	0.00059132	0.00051603	2	4	4	4	3.5	0.00014321	0.0001175	0	0	0.000130355	2	1	0	0	0.75
HLCS	1 genes:HLCS. 2 proteins in this group did not match any genes. gi|530418853|ref|XP_005261010.1|:HLCS:PREDICTED: biotin--protein ligase isoform X1 [Homo sapiens] ;gi|578836517|ref|XP_006724056.1|:PREDICTED: biotin--protein ligase isoform X5 [Homo sapiens] ;gi|578836525|ref|XP_006724059.1|:PREDICTED: biotin--protein ligase isoform X8 [Homo sapiens] ;	3.65464	0.00470123	0.00041097	0.00050564	0.00021742	0.00044502	0.000394763	9	11	4	9	8.25	7.185e-05	7.86e-05	0.0001736	0	0.000108017	3	2	5	0	2.5
BTF3L4	transcription factor BTF3 homolog 4 isoform 1 [Homo sapiens]	3.61415	0.0406624	0.00050461	0.00177788	0.00090098	0.00054641	0.00093247	2	7	3	2	3.5	0.00013234	0	0.00038367	0	0.000258005	1	0	2	0	0.75
SYNJ1	1 genes:SYNJ1. 5 proteins in this group did not match any genes. gi|237757310|ref|NP_003886.3|:SYNJ1:synaptojanin-1 isoform a [Homo sapiens] ;gi|237757326|ref|NP_001153778.1|:SYNJ1:synaptojanin-1 isoform d [Homo sapiens] ;gi|530419122|ref|XP_005261133.1|:PREDICTED: synaptojanin-1 isoform X2 [Homo sapiens] ;gi|578836711|ref|XP_006724121.1|:PREDICTED: synaptojanin-1 isoform X8 [Homo sapiens] ;gi|57…	3.34425	0.0324674	9.892e-05	9.958e-05	0.00014718	2.678e-05	9.3115e-05	4	4	5	1	3.5	3.891e-05	2.128e-05	0	2.334e-05	2.78433e-05	3	1	0	1	1.25
BTF3	transcription factor BTF3 isoform B [Homo sapiens]	3.28418	0.0499712	0.00086127	0.00198169	0.0023433	0.00399691	0.00229579	3.5	8	8	15	8.625	0.00051627	0.00074126	0.00084194	0.00069671	0.000699045	4	3.5	4.5	3	3.75
RUVBL1	ruvB-like 1 [Homo sapiens]	3.27412	1.90959e-06	0.0187084	0.0189206	0.0163376	0.0180807	0.0180118	214	215	157	191	194.25	0.00518141	0.0063955	0.00465281	0.00577534	0.00550126	113	85	70	70	84.5
TCP1	T-complex protein 1 subunit alpha isoform a [Homo sapiens]	3.09976	0.000483178	0.0103963	0.00642356	0.00861985	0.00908362	0.00863084	145	89	101	117	113	0.00259483	0.00228322	0.00294375	0.00331563	0.00278436	69	37	54	49	52.25
SEPT7	1 genes:SEPT7. 4 proteins in this group did not match any genes. gi|148352329|ref|NP_001011553.2|:SEPT7:septin-7 isoform 2 [Homo sapiens] ;gi|148352331|ref|NP_001779.3|:SEPT7:septin-7 isoform 1 [Homo sapiens] ;gi|578813710|ref|XP_006715869.1|:SEPT7:PREDICTED: septin-7 isoform X1 [Homo sapiens] ;gi|578813712|ref|XP_006715870.1|:PREDICTED: septin-7 isoform X2 [Homo sapiens] ;gi|578813714|ref|XP_006…	3.0921	0.00104321	0.00073146	0.00073632	0.00087068	0.00089105	0.000807378	8	8	8	9	8.25	0.00038365	0.00015739	0.00041711	8.629e-05	0.00026111	8	2	6	1	4.25
NUDC	nuclear migration protein nudC [Homo sapiens]	3.04384	0.00203526	0.0036131	0.00412204	0.00501756	0.00586857	0.00465532	30	34	35	45	36	0.00252677	0.00103656	0.00119041	0.00136395	0.00152942	40	10	13	12	18.75

## Sheet: IC2 network
				IC2-BioID										BioID control
				distributed normalized spectral abundance factor (dNSAF)					distributed Spectral Counts					distributed normalized spectral abundance factor (dNSAF)					distributed Spectral Counts
NCBI_Gene	Description	enrichment ratio	p-value	dNSAF 1	dNSAF 2	dNSAF 3	dNSAF 4	avg dNSAF	dSC 1	dSC 2	dSC 3	dSC 4	avg dSCs	dNSAF 1	dNSAF 2	dNSAF 3	dNSAF 4	avg dNSAF	dSC 1	dSC 2	dSC 3	dSC 4	avg dSCs
NOB1	RNA-binding protein NOB1 [Homo sapiens]	∞	0.00178744	0.00025113	0.00013633	0.00027899	0.00013581	0.000200565	4	1	3	1	2.25	0	0	0	0	0	0	0	0	0	0
	AH receptor-interacting protein [Homo sapiens]	∞	3.84568e-05	0.00031354	0.00034041	0.00046443	0.00033912	0.000364375	4	2	4	2	3	0	0	0	0	0	0	0	0	0	0
DNAH7	dynein heavy chain 7, axonemal [Homo sapiens]	∞	1.26858e-05	3.214e-05	2.792e-05	3.809e-05	2.781e-05	3.149e-05	5	2	4	2	3.25	0	0	0	0	0	0	0	0	0	0
ACTR10	actin-related protein 10 [Homo sapiens]	∞	1.81581e-05	0.00068234	0.00053877	0.00073506	0.0008051	0.000690318	11	4	8	6	7.25	0	0	0	0	0	0	0	0	0	0
DCTN4	dynactin subunit 4 isoform b [Homo sapiens]	∞	0.00415002	0.00056232	0.00146523	0.00074964	0.00145968	0.00105922	10	12	9	12	10.75	0	0	0	0	0	0	0	0	0	0
DYNLT3	dynein light chain Tctex-type 3 [Homo sapiens]	∞	0.000326747	0.0144944	0.00774718	0.0115606	0.0149533	0.0121889	65	16	35	31	36.75	0	0	0	0	0	0	0	0	0	0
DYNC1I2	PREDICTED: cytoplasmic dynein 1 intermediate chain 2 isoform X5 [Homo sapiens]	1157.8	0.000191162	0.0409286	0.0740303	0.0545626	0.05259	0.0555279	1000	833	900	594	831.75	0	0	4.796e-05	0	4.796e-05	0	0	1	0	0.25
DYNC1LI1	cytoplasmic dynein 1 light intermediate chain 1 [Homo sapiens]	65.0039	5.78315e-05	0.00853292	0.0136052	0.0109712	0.0100885	0.0107994	172.526	126.685	149.756	94.2959	135.816	8.44e-05	0.00026241	0.00017386	0.00014387	0.000166135	2.11111	4	3	2	2.77778
DYNC1H1	cytoplasmic dynein 1 heavy chain 1 [Homo sapiens]	37.3813	9.36814e-05	0.0108679	0.0183395	0.0142341	0.0159577	0.0148498	1952	1517	1726	1325	1630	0.00020252	0.00045048	0.00045014	0.00048587	0.000397253	45	61	69	60	58.75
DYNLT1	dynein light chain Tctex-type 1 [Homo sapiens]	31.9953	0.000415378	0.0224332	0.0109352	0.0203443	0.017331	0.0177609	98	22	60	35	53.75	0.00055511	0	0	0	0.00055511	3	0	0	0	0.75
DYNC1LI2	cytoplasmic dynein 1 light intermediate chain 2 isoform 1 [Homo sapiens]	19.6754	0.000111574	0.00659677	0.00951132	0.0106102	0.0111117	0.0094575	125.474	83.3152	136.244	97.7041	110.684	0.00071775	0.00041841	0	0.00030587	0.000480677	16.8889	6	0	4	6.72222
DCTN2	dynactin subunit 2 isoform 3 [Homo sapiens]	11.2456	0.00273063	0.00251573	0.00168081	0.00191098	0.0037675	0.00246875	39	12	20	27	24.5	0.00026071	0.00017112	0.00022676	0	0.00021953	5	2	3	0	2.5
NIN	1 genes:NIN.gi|148536869|ref|NP_065972.3|:NIN:ninein isoform 2 [Homo sapiens] ;gi|33946321|ref|NP_891991.1|:NIN:ninein isoform 5 [Homo sapiens] ;	10.5121	0.00227923	8.489e-05	0.00015799	0.00019759	0.00023609	0.00016914	7	6	11	9	8.25	0	1.609e-05	0	0	1.609e-05	0	1	0	0	0.25
VBP1	prefoldin subunit 3 [Homo sapiens]	10.2151	0.000670222	0.00643389	0.00997892	0.00525131	0.00738484	0.00726224	49	35	27	26	34.25	0.00095524	0.00104497	0.00046157	0.00038195	0.000710933	9	6	3	2	5
CCT8	T-complex protein 1 subunit theta isoform 1 [Homo sapiens]	10.1097	9.65984e-06	0.027283	0.0241887	0.0214648	0.0205234	0.023365	578	236	307	201	330.5	0.00301426	0.00187828	0.00188053	0.00247153	0.00231115	79	30	34	36	44.75
CCT5	T-complex protein 1 subunit epsilon [Homo sapiens]	8.6871	1.90824e-05	0.0223287	0.0266819	0.0195471	0.0261672	0.0236812	467	257	276	253	313.25	0.00367165	0.00190259	0.00240909	0.00292076	0.00272602	95	30	43	42	52.5
PFDN5	prefoldin subunit 5 isoform alpha [Homo sapiens]	8.65109	0.0113031	0.00823037	0.00218833	0.00398079	0.0054501	0.0049624	49	6	16	15	21.5	0.00095041	0	0.00019682	0	0.000573615	7	0	1	0	2
PFDN2	prefoldin subunit 2 [Homo sapiens]	7.32806	0.00141009	0.00419917	0.00182361	0.00348319	0.00327006	0.00319401	25	5	14	9	13.25	0.00027155	0.00044558	0.00059045	0	0.00043586	2	2	3	0	1.75
DCTN1	1 genes:DCTN1.gi|13259510|ref|NP_004073.2|:DCTN1:dynactin subunit 1 isoform 1 [Homo sapiens] ;gi|205277392|ref|NP_001128512.1|:DCTN1:dynactin subunit 1 isoform 3 [Homo sapiens] ;gi|299890871|ref|NP_001177765.1|:DCTN1:dynactin subunit 1 isoform 5 [Homo sapiens] ;gi|299890875|ref|NP_001177766.1|:DCTN1:dynactin subunit 1 isoform 6 [Homo sapiens] ;	6.46744	3.49434e-05	0.00125489	0.00096688	0.0009294	0.00105079	0.00105049	62	22	31	24	34.75	6.544e-05	0.00024162	0.00016602	0.00017663	0.000162427	4	9	7	6	6.5
KRT19	keratin, type I cytoskeletal 19 [Homo sapiens]	6.27772	0.00273237	0.00209326	0.00195045	0.00301099	0.00153875	0.00214836	32.3697	13.8903	31.4339	11	22.1735	0.00014811	0.00012866	0.00015155	0.00094056	0.00034222	2.83333	1.5	2	10	4.08333
DYNLL1	dynein light chain 1, cytoplasmic [Homo sapiens]	6.21528	0.00299909	0.00860667	0.0073436	0.0154982	0.0134722	0.0112302	29.6129	11.6364	36	21.4286	24.6695	0.00164453	0.00222736	0.00229877	0.0010568	0.00180686	7	5.77778	6.75	2.5	5.50694
CCT6A	T-complex protein 1 subunit zeta isoform a [Homo sapiens]	6.17454	0.00185794	0.0174394	0.0194628	0.00959681	0.0120128	0.014628	358	184	133	114	197.25	0.00145694	0.00284301	0.0026257	0.00255066	0.00236908	37	44	46	36	40.75
CCT2	T-complex protein 1 subunit beta isoform 1 [Homo sapiens]	6.09108	0.044707	0.00836443	0.00682403	0.00243498	0.00188258	0.0048765	173	65	34	18	72.5	0.00121155	0.00070544	0.00079315	0.00049225	0.000800597	31	11	14	7	15.75
BICD2	protein bicaudal D homolog 2 isoform 1 [Homo sapiens]	5.20146	3.56133e-07	0.00685674	0.0078831	0.00757175	0.00745344	0.00744126	226.642	120	168.963	113.891	157.374	0.00180967	0.0014045	0.0012762	0.00123207	0.00143061	74	35	36	28	43.25
ACTR1A	alpha-centractin [Homo sapiens]	4.76674	0.000881836	0.00106945	0.00194195	0.00193613	0.00178578	0.00168333	15.5455	13	19	12	14.8864	0	0.00045625	0.00040305	0.00020012	0.00035314	0	5	5	2	3
FAM160A1	PREDICTED: protein FAM160A1 isoform X1 [Homo sapiens]	3.5336	0.00237931	0.0004477	0.00064808	0.00036841	0.00043042	0.000473652	18	12	10	8	12	0.00016084	9.897e-05	0.00020401	7.235e-05	0.000134042	8	3	7	2	5
BTF3L4	transcription factor BTF3 homolog 4 isoform 1 [Homo sapiens]	3.37642	0.00114148	0.00098229	0.00106646	0.0007275	0.00070828	0.000871133	6	3	3	2	3.5	0.00013234	0	0.00038367	0	0.000258005	1	0	2	0	0.75
RPL28	1 genes:RPL28. 1 proteins in this group did not match any genes. gi|13904866|ref|NP_000982.2|:RPL28:60S ribosomal protein L28 isoform 2 [Homo sapiens] ;gi|209915581|ref|NP_001129606.1|:RPL28:60S ribosomal protein L28 isoform 1 [Homo sapiens] ;gi|209915584|ref|NP_001129607.1|:RPL28:60S ribosomal protein L28 isoform 3 [Homo sapiens] ;gi|530416988|ref|XP_005259189.1|:PREDICTED: 60S ribosomal protein…	3.2812	0.00180726	0.00094405	0.00122994	0.00167803	0.00122528	0.00126932	5	3	6	3	4.25	0.00030524	0.00025044	0.00044248	0.00054923	0.000386848	2	1	2	2	1.75
CFI	1 genes:CFI. 1 proteins in this group did not match any genes. gi|119392081|ref|NP_000195.2|:CFI:complement factor I preproprotein [Homo sapiens] ;gi|530377645|ref|XP_005263032.1|:PREDICTED: complement factor I isoform X1 [Homo sapiens] ;gi|530377647|ref|XP_005263033.1|:CFI:PREDICTED: complement factor I isoform X2 [Homo sapiens] ;gi|578809101|ref|XP_006714272.1|:CFI:PREDICTED: complement factor …	3.05381	0.0327619	8.874e-05	0.00019268	6.572e-05	0.00028793	0.000158767	2	2	1	3	2	0	0	5.199e-05	0	5.199e-05	0	0	1	0	0.25

[truncated: 7 more sheets: LIC1 network, LIC2 network, TcTex network, RB  network, p62 network, core hits, core Venn]
