# Supplementary material for: The human cytoplasmic dynein interactome reveals novel activators of motility
Source: eLife. 2017 Jul 18;6:e28257. doi: 10.7554/eLife.28257 (PMC5533585; doi:10.7554/eLife.28257)
Supplement: Supplementary file 5. — This excel file contains gene ontology analyses using the ‘cellular component’ option (GO, geneontology.org). The GO terms with p-values<0.05 are shown for hits that were shared in at least three C-terminal BioID datasets; C-terminal hits that were specific to BICD2, HOOK1, HOOK3, NIN, and NINL; and C-terminal hits that were shared by activator family members BICD1 and BICD2, HOOK1 and HOOK3, and NIN and NINL. DOI: http://dx.doi.org/10.7554/eLife.28257.021 [file elife-28257-supp5.xlsx]

## Sheet: CT HITS_SEP_NETWORK_ANALYSIS
This is the GO analysis for hits that are shared in at least three C-terminal BioID data sets. Corresponding to data analysis outlined in Figure 6B.
Analysis Type:	PANTHER Overrepresentation Test (release 20170413)
Annotation Version and Release Date:	GO Ontology database Released 2017-04-24
Analyzed List:	upload_1 (Homo sapiens)
Reference List:	Homo sapiens (all genes in database)
Bonferroni correction:	TRUE
Bonferroni count:	1287
GO cellular component complete	Homo sapiens - REFLIST (20972)	upload_1 (20)	upload_1 (expected)	upload_1 (over/under)	upload_1 (fold Enrichment)	upload_1 (P-value)
F-actin capping protein complex (GO:0008290)	8	2	0.01	+	> 100	0.0354
intraciliary transport particle B (GO:0030992)	20	3	0.02	+	> 100	0.00126
intraciliary transport particle (GO:0030990)	31	3	0.03	+	> 100	0.00465
ciliary tip (GO:0097542)	45	3	0.04	+	69.91	0.0141
ciliary basal body (GO:0036064)	107	4	0.1	+	39.2	0.00396
microtubule organizing center part (GO:0044450)	163	4	0.16	+	25.73	0.0206
centrosome (GO:0005813)	459	7	0.44	+	15.99	0.000187
ciliary part (GO:0044441)	399	5	0.38	+	13.14	0.0392
microtubule organizing center (GO:0005815)	664	8	0.63	+	12.63	0.000116
cytoskeletal part (GO:0044430)	1549	12	1.48	+	8.12	2.43e-06
microtubule cytoskeleton (GO:0015630)	1096	8	1.05	+	7.65	0.00511
cytoskeleton (GO:0005856)	2044	12	1.95	+	6.16	5.61e-05
Unclassified (UNCLASSIFIED)	2570	3	2.45	+	1.22	0

## Sheet: BICD2
This is the GO analysis for hits that are only in BICD2-BioID data set. Corresponding to data analysis outlined in Figure 6-Figure Supplement 1.
Analysis Type:	PANTHER Overrepresentation Test (release 20170413)
Annotation Version and Release Date:	GO Ontology database Released 2017-04-24
Analyzed List:	upload_1 (Homo sapiens)
Reference List:	Homo sapiens (all genes in database)
Bonferroni correction:	TRUE
Bonferroni count:	1287
GO cellular component complete	Homo sapiens - REFLIST (20972)	upload_1 (139)	upload_1 (expected)	upload_1 (over/under)	upload_1 (fold Enrichment)	upload_1 (P-value)
septin complex (GO:0031105)	6	3	0.04	+	75.44	0.0128
septin cytoskeleton (GO:0032156)	7	3	0.05	+	64.66	0.0203
Arp2/3 protein complex (GO:0005885)	12	4	0.08	+	50.29	0.00193
exosome (RNase complex) (GO:0000178)	23	4	0.15	+	26.24	0.0246
exoribonuclease complex (GO:1905354)	23	4	0.15	+	26.24	0.0246
actin filament bundle (GO:0032432)	63	6	0.42	+	14.37	0.00603
contractile actin filament bundle (GO:0097517)	55	5	0.36	+	13.72	0.0479
stress fiber (GO:0001725)	55	5	0.36	+	13.72	0.0479
cell-cell adherens junction (GO:0005913)	87	7	0.58	+	12.14	0.00288
actin filament (GO:0005884)	89	7	0.59	+	11.87	0.00334
actin cytoskeleton (GO:0015629)	457	20	3.03	+	6.6	4.42e-08
cell leading edge (GO:0031252)	362	14	2.4	+	5.84	0.000208
adherens junction (GO:0005912)	495	18	3.28	+	5.49	8.09e-06
focal adhesion (GO:0005925)	393	14	2.6	+	5.37	0.000554
cell-substrate adherens junction (GO:0005924)	396	14	2.62	+	5.33	0.000606
anchoring junction (GO:0070161)	515	18	3.41	+	5.27	1.48e-05
cell-substrate junction (GO:0030055)	401	14	2.66	+	5.27	0.000702
cell-cell junction (GO:0005911)	417	13	2.76	+	4.7	0.00617
polymeric cytoskeletal fiber (GO:0099513)	683	18	4.53	+	3.98	0.000936
supramolecular fiber (GO:0099512)	901	20	5.97	+	3.35	0.003
supramolecular polymer (GO:0099081)	908	20	6.02	+	3.32	0.00337
supramolecular complex (GO:0099080)	909	20	6.02	+	3.32	0.00343
cytoskeletal part (GO:0044430)	1549	33	10.27	+	3.21	2.2e-06
cytoskeleton (GO:0005856)	2044	42	13.55	+	3.1	1.96e-08
cell junction (GO:0030054)	1208	24	8.01	+	3	0.00183
cytosol (GO:0005829)	4796	93	31.79	+	2.93	3.79e-25
plasma membrane bounded cell projection (GO:0120025)	1758	29	11.65	+	2.49	0.00518
cell projection (GO:0042995)	1872	30	12.41	+	2.42	0.00606
intracellular non-membrane-bounded organelle (GO:0043232)	3977	58	26.36	+	2.2	7.02e-07
non-membrane-bounded organelle (GO:0043228)	3977	58	26.36	+	2.2	7.02e-07
extracellular exosome (GO:0070062)	2752	37	18.24	+	2.03	0.0211
extracellular vesicle (GO:1903561)	2767	37	18.34	+	2.02	0.0239
extracellular organelle (GO:0043230)	2768	37	18.35	+	2.02	0.0241
vesicle (GO:0031982)	4218	50	27.96	+	1.79	0.0135
cytoplasmic part (GO:0044444)	9218	107	61.1	+	1.75	2.83e-12
cytoplasm (GO:0005737)	11177	125	74.08	+	1.69	1.39e-17
intracellular organelle part (GO:0044446)	8705	85	57.7	+	1.47	0.00311
organelle part (GO:0044422)	8914	85	59.08	+	1.44	0.00952
intracellular part (GO:0044424)	14061	130	93.19	+	1.39	7.52e-11
intracellular (GO:0005622)	14391	131	95.38	+	1.37	1.47e-10
intracellular organelle (GO:0043229)	12289	111	81.45	+	1.36	0.000114
organelle (GO:0043226)	13287	113	88.06	+	1.28	0.00412
cell part (GO:0044464)	17440	133	115.59	+	1.15	0.00744
cell (GO:0005623)	17464	133	115.75	+	1.15	0.0086
Unclassified (UNCLASSIFIED)	2570	4	17.03	-	0.23	0
integral component of membrane (GO:0016021)	5732	8	37.99	-	0.21	9.18e-08
intrinsic component of membrane (GO:0031224)	5854	8	38.8	-	0.21	3.77e-08

## Sheet: HOOK1
This is the GO analysis for hits that are only in HOOK1-BioID data set. Corresponding to data analysis outlined in Figure 6-Figure Supplement 1.
Analysis Type:	PANTHER Overrepresentation Test (release 20170413)
Annotation Version and Release Date:	GO Ontology database Released 2017-04-24
Analyzed List:	upload_1 (Homo sapiens)
Reference List:	Homo sapiens (all genes in database)
Bonferroni correction:	TRUE
Bonferroni count:	1287
GO cellular component complete	Homo sapiens - REFLIST (20972)	upload_1 (21)	upload_1 (expected)	upload_1 (over/under)	upload_1 (fold Enrichment)	upload_1 (P-value)
zona pellucida receptor complex (GO:0002199)	9	2	0.01	+	> 100	0.0495
endosome lumen (GO:0031904)	32	3	0.03	+	93.62	0.00596
microtubule (GO:0005874)	393	5	0.39	+	12.71	0.0471
cytosol (GO:0005829)	4796	14	4.8	+	2.92	0.03
Unclassified (UNCLASSIFIED)	2570	1	2.57	-	0.39	0

## Sheet: HOOK3
This is the GO analysis for hits that are only in HOOK3-BioID data set. Corresponding to data analysis outlined in Figure 6-Figure Supplement 1.
Analysis Type:	PANTHER Overrepresentation Test (release 20170413)
Annotation Version and Release Date:	GO Ontology database Released 2017-04-24
Analyzed List:	upload_1 (Homo sapiens)
Reference List:	Homo sapiens (all genes in database)
Bonferroni correction:	TRUE
Bonferroni count:	1287
GO cellular component complete	Homo sapiens - REFLIST (20972)	upload_1 (24)	upload_1 (expected)	upload_1 (over/under)	upload_1 (fold Enrichment)	upload_1 (P-value)
AP-1 adaptor complex (GO:0030121)	6	2	0.01	+	> 100	0.029
clathrin coat (GO:0030118)	48	3	0.05	+	54.61	0.0301
membrane (GO:0016020)	9488	21	10.86	+	1.93	0.028
Unclassified (UNCLASSIFIED)	2570	1	2.94	-	0.34	0

## Sheet: NIN
This is the GO analysis for hits that are only in NIN-BioID data set. Corresponding to data analysis outlined in Figure 6-Figure Supplement 1.
Analysis Type:	PANTHER Overrepresentation Test (release 20170413)
Annotation Version and Release Date:	GO Ontology database Released 2017-04-24
Analyzed List:	upload_1 (Homo sapiens)
Reference List:	Homo sapiens (all genes in database)
Bonferroni correction:	TRUE
Bonferroni count:	1287
GO cellular component complete	Homo sapiens - REFLIST (20972)	upload_1 (49)	upload_1 (expected)	upload_1 (over/under)	upload_1 (fold Enrichment)	upload_1 (P-value)
dynactin complex (GO:0005869)	8	5	0.02	+	> 100	1.95e-08
microtubule plus-end (GO:0035371)	19	3	0.04	+	67.58	0.0171
microtubule end (GO:1990752)	24	3	0.06	+	53.5	0.0342
microtubule associated complex (GO:0005875)	146	7	0.34	+	20.52	6.78e-05
centriole (GO:0005814)	118	5	0.28	+	18.14	0.0113
kinetochore (GO:0000776)	131	5	0.31	+	16.34	0.0186
spindle pole (GO:0000922)	134	5	0.31	+	15.97	0.0207
centrosome (GO:0005813)	459	17	1.07	+	15.85	2.6e-13
microtubule organizing center part (GO:0044450)	163	6	0.38	+	15.75	0.00298
spindle (GO:0005819)	304	9	0.71	+	12.67	4.42e-05
microtubule organizing center (GO:0005815)	664	19	1.55	+	12.25	3.14e-13
microtubule (GO:0005874)	393	8	0.92	+	8.71	0.00445
microtubule cytoskeleton (GO:0015630)	1096	22	2.56	+	8.59	1.01e-12
cytoskeletal part (GO:0044430)	1549	25	3.62	+	6.91	7.14e-13
polymeric cytoskeletal fiber (GO:0099513)	683	11	1.6	+	6.89	0.000521
cytoskeleton (GO:0005856)	2044	26	4.78	+	5.44	4.01e-11
supramolecular fiber (GO:0099512)	901	11	2.11	+	5.23	0.00756
supramolecular polymer (GO:0099081)	908	11	2.12	+	5.19	0.00814
supramolecular complex (GO:0099080)	909	11	2.12	+	5.18	0.00822
intracellular non-membrane-bounded organelle (GO:0043232)	3977	30	9.29	+	3.23	1.13e-07
non-membrane-bounded organelle (GO:0043228)	3977	30	9.29	+	3.23	1.13e-07
protein complex (GO:0043234)	3118	19	7.29	+	2.61	0.0488
cytosol (GO:0005829)	4796	26	11.21	+	2.32	0.00556
organelle part (GO:0044422)	8914	37	20.83	+	1.78	0.00358
intracellular organelle part (GO:0044446)	8705	36	20.34	+	1.77	0.00748
cytoplasm (GO:0005737)	11177	40	26.11	+	1.53	0.043
intracellular part (GO:0044424)	14061	47	32.85	+	1.43	0.00124
intracellular (GO:0005622)	14391	47	33.62	+	1.4	0.00336
Unclassified (UNCLASSIFIED)	2570	1	6	-	< 0.2	0
integral component of membrane (GO:0016021)	5732	2	13.39	-	< 0.2	0.0384
intrinsic component of membrane (GO:0031224)	5854	2	13.68	-	< 0.2	0.0274

## Sheet: NINL
This is the GO analysis for hits that are only in NINL-BioID data set. Corresponding to data analysis outlined in Figure 6-Figure Supplement 1.
Analysis Type:	PANTHER Overrepresentation Test (release 20170413)
Annotation Version and Release Date:	GO Ontology database Released 2017-04-24
Analyzed List:	upload_1 (Homo sapiens)
Reference List:	Homo sapiens (all genes in database)
Bonferroni correction:	TRUE
Bonferroni count:	1287
GO cellular component complete	Homo sapiens - REFLIST (20972)	upload_1 (41)	upload_1 (expected)	upload_1 (over/under)	upload_1 (fold Enrichment)	upload_1 (P-value)
spindle (GO:0005819)	304	6	0.59	+	10.1	0.0347
microtubule (GO:0005874)	393	7	0.77	+	9.11	0.0134
microtubule organizing center (GO:0005815)	664	10	1.3	+	7.7	0.000593
microtubule cytoskeleton (GO:0015630)	1096	15	2.14	+	7	1.31e-06
polymeric cytoskeletal fiber (GO:0099513)	683	9	1.34	+	6.74	0.00721
cytoskeletal part (GO:0044430)	1549	17	3.03	+	5.61	2e-06
nucleoplasm part (GO:0044451)	1065	10	2.08	+	4.8	0.0384
cytoskeleton (GO:0005856)	2044	17	4	+	4.25	0.000125
intracellular non-membrane-bounded organelle (GO:0043232)	3977	23	7.77	+	2.96	0.000176
non-membrane-bounded organelle (GO:0043228)	3977	23	7.77	+	2.96	0.000176
nucleoplasm (GO:0005654)	3281	18	6.41	+	2.81	0.021
intracellular organelle part (GO:0044446)	8705	32	17.02	+	1.88	0.00268
organelle part (GO:0044422)	8914	32	17.43	+	1.84	0.00495
Unclassified (UNCLASSIFIED)	2570	3	5.02	-	0.6	0
integral component of membrane (GO:0016021)	5732	1	11.21	-	< 0.2	0.0437
intrinsic component of membrane (GO:0031224)	5854	1	11.44	-	< 0.2	0.0323

## Sheet: BICD1_BICD2
This is the GO analysis for hits that are in both the BICD1-BioID and BICD2-BioID data sets. Corresponding to data analysis outlined in Figure 6-Figure Supplement 1.
Analysis Type:	PANTHER Overrepresentation Test (release 20170413)
Annotation Version and Release Date:	GO Ontology database Released 2017-04-24
Analyzed List:	upload_1 (Homo sapiens)
Reference List:	Homo sapiens (all genes in database)
Bonferroni correction:	TRUE
Bonferroni count:	1287
GO cellular component complete	Homo sapiens - REFLIST (20972)	upload_1 (45)	upload_1 (expected)	upload_1 (over/under)	upload_1 (fold Enrichment)	upload_1 (P-value)
actin cap (GO:0030478)	4	2	0.01	+	> 100	0.0461
podosome (GO:0002102)	32	4	0.07	+	58.26	0.000989
ruffle (GO:0001726)	159	5	0.34	+	14.66	0.0306
actin cytoskeleton (GO:0015629)	457	12	0.98	+	12.24	2.17e-07
cell cortex (GO:0005938)	240	6	0.51	+	11.65	0.0161
cell leading edge (GO:0031252)	362	7	0.78	+	9.01	0.015
focal adhesion (GO:0005925)	393	7	0.84	+	8.3	0.0254
cell-substrate adherens junction (GO:0005924)	396	7	0.85	+	8.24	0.0266
cell-substrate junction (GO:0030055)	401	7	0.86	+	8.14	0.0288
adherens junction (GO:0005912)	495	8	1.06	+	7.53	0.0122
anchoring junction (GO:0070161)	515	8	1.11	+	7.24	0.0163
cell junction (GO:0030054)	1208	13	2.59	+	5.02	0.00125
cell projection (GO:0042995)	1872	20	4.02	+	4.98	4.59e-07
cytoskeleton (GO:0005856)	2044	21	4.39	+	4.79	2.74e-07
plasma membrane bounded cell projection (GO:0120025)	1758	18	3.77	+	4.77	9.95e-06
cytoskeletal part (GO:0044430)	1549	14	3.32	+	4.21	0.00342
cytosol (GO:0005829)	4796	33	10.29	+	3.21	1.31e-09
intracellular non-membrane-bounded organelle (GO:0043232)	3977	23	8.53	+	2.7	0.00162
non-membrane-bounded organelle (GO:0043228)	3977	23	8.53	+	2.7	0.00162
cytoplasmic part (GO:0044444)	9218	39	19.78	+	1.97	4.38e-06
cytoplasm (GO:0005737)	11177	41	23.98	+	1.71	6.35e-05
Unclassified (UNCLASSIFIED)	2570	1	5.51	-	< 0.2	0

## Sheet: HOOK1_HOOK3
This is the GO analysis for hits that are in both the HOOK1-BioID and HOOK3-BioID data sets. Corresponding to data analysis outlined in Figure 6-Figure Supplement 1.
Analysis Type:	PANTHER Overrepresentation Test (release 20170413)
Annotation Version and Release Date:	GO Ontology database Released 2017-04-24
Analyzed List:	upload_1 (Homo sapiens)
Reference List:	Homo sapiens (all genes in database)
Bonferroni correction:	TRUE
Bonferroni count:	1287
GO cellular component complete	Homo sapiens - REFLIST (20972)	upload_1 (15)	upload_1 (expected)	upload_1 (over/under)	upload_1 (fold Enrichment)	upload_1 (P-value)
ciliary rootlet (GO:0035253)	10	2	0.01	+	> 100	0.0306
kinesin complex (GO:0005871)	55	5	0.04	+	> 100	4.69e-07
microtubule associated complex (GO:0005875)	146	5	0.1	+	47.88	5.96e-05
microtubule (GO:0005874)	393	5	0.28	+	17.79	0.00763
Unclassified (UNCLASSIFIED)	2570	2	1.84	+	1.09	0

## Sheet: NIN_NINL
This is the GO analysis for hits that are in both the NIN-BioID and NINL-BioID data sets. Corresponding to data analysis outlined in Figure 6-Figure Supplement 1.
Analysis Type:	PANTHER Overrepresentation Test (release 20170413)
Annotation Version and Release Date:	GO Ontology database Released 2017-04-24
Analyzed List:	upload_1 (Homo sapiens)
Reference List:	Homo sapiens (all genes in database)
Bonferroni correction:	TRUE
Bonferroni count:	1287
GO cellular component complete	Homo sapiens - REFLIST (20972)	upload_1 (26)	upload_1 (expected)	upload_1 (over/under)	upload_1 (fold Enrichment)	upload_1 (P-value)
axonemal microtubule (GO:0005879)	6	2	0.01	+	> 100	0.0341
centriole (GO:0005814)	118	6	0.15	+	41.01	8.54e-06
microtubule organizing center part (GO:0044450)	163	8	0.2	+	39.59	2.36e-08
spindle pole (GO:0000922)	134	5	0.17	+	30.1	0.000806
centrosome (GO:0005813)	459	16	0.57	+	28.12	1.54e-17
spindle (GO:0005819)	304	9	0.38	+	23.88	9.09e-08
microtubule organizing center (GO:0005815)	664	19	0.82	+	23.08	2.21e-20
microtubule cytoskeleton (GO:0015630)	1096	20	1.36	+	14.72	5.04e-18
microtubule (GO:0005874)	393	7	0.49	+	14.37	0.000502
cytoskeletal part (GO:0044430)	1549	20	1.92	+	10.41	4.47e-15
polymeric cytoskeletal fiber (GO:0099513)	683	8	0.85	+	9.45	0.0015
cytoskeleton (GO:0005856)	2044	21	2.53	+	8.29	3.03e-14
supramolecular fiber (GO:0099512)	901	8	1.12	+	7.16	0.0116
supramolecular polymer (GO:0099081)	908	8	1.13	+	7.11	0.0123
supramolecular complex (GO:0099080)	909	8	1.13	+	7.1	0.0124
intracellular non-membrane-bounded organelle (GO:0043232)	3977	21	4.93	+	4.26	2.14e-08
non-membrane-bounded organelle (GO:0043228)	3977	21	4.93	+	4.26	2.14e-08
cytosol (GO:0005829)	4796	16	5.95	+	2.69	0.0343
intracellular organelle part (GO:0044446)	8705	22	10.79	+	2.04	0.0101
organelle part (GO:0044422)	8914	22	11.05	+	1.99	0.0161
Unclassified (UNCLASSIFIED)	2570	2	3.19	-	0.63	0
